# Supplementary material for: Systematic review of Indigenous cultural safety training interventions for healthcare professionals in Australia, Canada, New Zealand and the United States
Source: PubMed Central journal article supplement — BMJ Open. 2023 Oct 4;13(10):e073320. doi: 10.1136/bmjopen-2023-073320 (PMC10551980; doi:10.1136/bmjopen-2023-073320), 2023-10-04
Supplement: bmjopen-2023-073320.draft_revisions.pdf [file bmjopen-2023-073320.draft_revisions.pdf]

# BMJ Open

BMJ Open is committed to open peer review. As part of this commitment we make the peer review history of every article we publish publicly available.

When an article is published we post the peer reviewers' comments and the authors' responses online. We also post the versions of the paper that were used during peer review. These are the versions that the peer review comments apply to.

The versions of the paper that follow are the versions that were submitted during the peer review process. They are not the versions of record or the final published versions. They should not be cited or distributed as the published version of this manuscript.

BMJ Open is an open access journal and the full, final, typeset and author-corrected version of record of the manuscript is available on our site with no access controls, subscription charges or pay-per-view fees (<http://bmjopen.bmj.com>).

If you have any questions on BMJ Open's open peer review process please email [info.bmjopen@bmj.com](mailto:info.bmjopen@bmj.com)

# BMJ Open

## Systematic review of Indigenous cultural safety training interventions for health care professionals

|                               |                                                                                                                                                                                                                                                                                                                                                                                                                                                                                                                                                                                                                                                                          |
|-------------------------------|--------------------------------------------------------------------------------------------------------------------------------------------------------------------------------------------------------------------------------------------------------------------------------------------------------------------------------------------------------------------------------------------------------------------------------------------------------------------------------------------------------------------------------------------------------------------------------------------------------------------------------------------------------------------------|
| Journal:                      | <i>BMJ Open</i>                                                                                                                                                                                                                                                                                                                                                                                                                                                                                                                                                                                                                                                          |
| Manuscript ID                 | bmjopen-2023-073320                                                                                                                                                                                                                                                                                                                                                                                                                                                                                                                                                                                                                                                      |
| Article Type:                 | Original research                                                                                                                                                                                                                                                                                                                                                                                                                                                                                                                                                                                                                                                        |
| Date Submitted by the Author: | 06-Mar-2023                                                                                                                                                                                                                                                                                                                                                                                                                                                                                                                                                                                                                                                              |
| Complete List of Authors:     | Hardy, Billie-Jo; University of Toronto - St George Campus, Dalla Lana School of Public Health; Unity Health Toronto, Well Living House, Li Ka Shing Knowledge Institute<br>Filipenko, Sam; Unity Health Toronto, Well Living House, Li Ka Shing Knowledge Institute<br>Smylie, Diane; Provincial Health Services Authority, San'yas Indigenous Cultural Safety Learning Programs, Indigenous Health<br>Ziegler, Carolyn; Unity Health Toronto, Health Sciences Library, St. Michael's Hospital<br>Smylie, Janet; Unity Health Toronto, Well Living House, Li Ka Shing Knowledge Institute; University of Toronto - St George Campus, Dalla Lana School of Public Health |
| Keywords:                     | EDUCATION & TRAINING (see Medical Education & Training), Health Equity, Health policy < HEALTH SERVICES ADMINISTRATION & MANAGEMENT, Quality in health care < HEALTH SERVICES ADMINISTRATION & MANAGEMENT, Systematic Review                                                                                                                                                                                                                                                                                                                                                                                                                                             |
|                               |                                                                                                                                                                                                                                                                                                                                                                                                                                                                                                                                                                                                                                                                          |

SCHOLARONE™  
Manuscripts

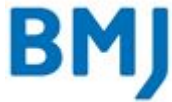

I, the Submitting Author has the right to grant and does grant on behalf of all authors of the Work (as defined in the below author licence), an exclusive licence and/or a non-exclusive licence for contributions from authors who are: i) UK Crown employees; ii) where BMJ has agreed a CC-BY licence shall apply, and/or iii) in accordance with the terms applicable for US Federal Government officers or employees acting as part of their official duties; on a worldwide, perpetual, irrevocable, royalty-free basis to BMJ Publishing Group Ltd ("BMJ") its licensees and where the relevant Journal is co-owned by BMJ to the co-owners of the Journal, to publish the Work in this journal and any other BMJ products and to exploit all rights, as set out in our [licence](#).

The Submitting Author accepts and understands that any supply made under these terms is made by BMJ to the Submitting Author unless you are acting as an employee on behalf of your employer or a postgraduate student of an affiliated institution which is paying any applicable article publishing charge ("APC") for Open Access articles. Where the Submitting Author wishes to make the Work available on an Open Access basis (and intends to pay the relevant APC), the terms of reuse of such Open Access shall be governed by a Creative Commons licence – details of these licences and which [Creative Commons](#) licence will apply to this Work are set out in our licence referred to above.

Other than as permitted in any relevant BMJ Author's Self Archiving Policies, I confirm this Work has not been accepted for publication elsewhere, is not being considered for publication elsewhere and does not duplicate material already published. I confirm all authors consent to publication of this Work and authorise the granting of this licence.

1  
2  
3  
4 1 **Systematic review of Indigenous Cultural Safety training interventions for**  
5  
6 2 **health care professionals**  
7  
8 3

9  
10 4 **AUTHORS**  
11  
12

13 5 Billie-Jo Hardy, Assistant Professor<sup>1</sup>, Sam Filipenko, Research Manager<sup>2</sup>, Diane  
14  
15  
16 6 Smylie, Senior Director<sup>3</sup>, Caroline Ziegler, Health Librarian<sup>4</sup> and Janet Smylie,  
17  
18  
19 7 Director<sup>2</sup>  
20  
21  
22 8

23  
24 9 <sup>1</sup>Dalla Lana School of Public Health, University of Toronto, Toronto, Canada  
25

26  
27 10 <sup>2</sup>Well Living House, Unity Health Toronto – St. Michael's Hospital, Toronto, Canada  
28

29 11 <sup>3</sup>San'yas Indigenous Cultural Safety Learning Programs. Indigenous Health, PHSA,  
30  
31  
32 12 Vancouver, Canada  
33

34  
35 13 <sup>4</sup>Health Sciences Library, St. Michael's Hospital, Unity Health Toronto, Toronto, Canada  
36  
37 14

38  
39  
40 15 **CORRESPONDING AUTHOR**  
41

42  
43 16 Billie-Jo Hardy, PhD.  
44

45  
46 17 Dalla Lana School of Public Health, University of Toronto,  
47

48 18 155 College St., Room 403, Toronto, ON M5T 3M7, Canada  
49

50  
51 19 Telephone No.: +1-416-841-2709  
52

53 20 [billiejo.hardy@utoronto.ca](mailto:billiejo.hardy@utoronto.ca)  
54  
55  
56 21

1  
2  
3  
4  
5  
6  
7  
8  
9  
10  
11  
12  
13  
14  
15  
16  
17  
18  
19  
20  
21  
22  
23  
24  
25  
26  
27  
28  
29  
30  
31  
32  
33  
34  
35  
36  
37  
38  
39  
40  
41  
42  
43  
44  
45  
46  
47  
48  
49  
50  
51  
52  
53  
54  
55  
56  
57  
58  
59  
60

22 **KEYWORDS**

23 Indigenous health, Education & Training, Health Equity, Health Policy, Quality in Health

24 Care

25

26 **WORDCOUNT** 4664

27

28

29

30

For peer review only

1  
2  
3  
4 31 **ABSTRACT**

5  
6 32 Objective: To synthesize and appraise the design and impact of peer-reviewed  
7  
8  
9 33 and published evaluations of Indigenous cultural safety training  
10  
11 34 programs and workshops for health care workers in what is now  
12  
13  
14 35 known as Australia, Canada, New Zealand, and/or the United States  
15  
16  
17 36 of America.

18  
19 37 Design: Systematic Review

20  
21  
22 38 Data Sources: Ovid Medline, Embase, PsycINFO, CINAHL, Cochrane Central  
23  
24 39 Register of Controlled Trials, Cochrane Database of Systematic  
25  
26  
27 40 Reviews, Bibliography of Indigenous People in North American,  
28  
29  
30 41 Applied Social Sciences Index & Abstracts, ERIC (Education  
31  
32 42 Resources Information Center), International Bibliography of the  
33  
34  
35 43 Social Sciences, ProQuest Dissertations & Theses Global,  
36  
37  
38 44 Sociological Abstracts, and Web of Science's Social Sciences  
39  
40 45 Citation Index and Science Citation Index from January 1, 2006 to  
41  
42  
43 46 May 12, 2022.

44  
45 47 Eligibility Criteria: Included studies that evaluated the outcomes of educational  
46  
47  
48 48 interventions designed to improve cultural safety, cultural  
49  
50  
51 49 competency, and/or cultural awareness for non-Indigenous adult  
52  
53 50 health care professionals. Interventions must have taken place in

1  
2  
3  
4 51 what is now known as Canada, Australia, New Zealand, or the United  
5  
6 52 States of America.  
7

8  
9 53 **Review Methods:** In consultation with our partners at the Southwest Ontario Aboriginal  
10  
11 54 Health Access Centre, a data extraction tool was developed to  
12  
13  
14 55 abstract information on the studies' methods, population, sampling  
15  
16 56 and recruitment, educational intervention design, and outcomes. The  
17  
18  
19 57 Well Living House Critical Appraisal Tool was then used  
20  
21  
22 58 independently by two authors to appraise the rigor, internal validity,  
23  
24 59 strength of evidence, and involvement of Indigenous communities in  
25  
26  
27 60 each study. An iterative narrative approach was used to synthesize  
28  
29  
30 61 our results.

31  
32 62 **Results:** 2,442 unique titles and abstracts were identified and screened for  
33  
34  
35 63 inclusion. Of these, 13 met the inclusion criteria and passed the  
36  
37 64 quality appraisal threshold. Study designs, intervention  
38  
39  
40 65 characteristics, and outcome measures were heterogenous. Most  
41  
42  
43 66 studies (n=9) used mixed methods, two used qualitative methods,  
44  
45 67 and two used quantitative methods with sample sizes ranging from 6  
46  
47  
48 68 to 621. Training participants included nurses, family practice  
49  
50  
51 69 residents, specialized practitioners (e.g., speech pathologists) and  
52  
53  
54 70 providers serving specific health service user populations (e.g.,  
55  
56 71 psychiatric care). Course content was similar across programs.

1  
2  
3  
4 72 Theoretical frameworks and pedagogical approaches varied. Study  
5  
6 73 outcomes were almost entirely learner-focused (n=10), and  
7  
8  
9 74 commonly examined self-reported changes in knowledge,  
10  
11 75 awareness, beliefs, attitudes, and/or the confidence and skills to  
12  
13  
14 76 provide care for Indigenous peoples. The involvement of local  
15  
16 77 Indigenous communities in the development, implementation, and  
17  
18  
19 78 evaluation of the interventions was limited overall.

20  
21  
22 79 **Conclusions:** There is minimal evidence regarding the effectiveness of specific  
23  
24 80 content and approaches to cultural safety training on improving non-  
25  
26  
27 81 Indigenous health professionals' knowledge and skills in caring for  
28  
29  
30 82 Indigenous patients. Future research is needed that advances the  
31  
32 83 methodological rigour of training evaluations and is better aligned to  
33  
34  
35 84 local, regional, and/or national Indigenous priorities and needs.  
36  
37  
38 85

39  
40 86 **SYSTEMATIC REVIEW REGISTRATION** Not Applicable  
41  
42

43 87  
44  
45 88 **WHAT IS ALREADY KNOWN ON THIS TOPIC** The approach, content, and  
46  
47  
48 89 evaluations of existing cultural competency trainings vary widely. It is unclear which  
49  
50  
51 90 training approaches and strategies are most effective, especially with respect to  
52  
53  
54 91 improving disparities in clinical outcomes.  
55  
56  
57  
58  
59  
60



1  
2  
3  
4 92  
5  
6 93 **WHAT THIS STUDY ADDS** Evaluations of cultural competency trainings  
7  
8  
9 94 demonstrated impact on knowledge and attitudes towards Indigenous peoples by  
10  
11 95 learners. However, none of these studies were able to establish an observable impact  
12  
13  
14 96 with respect to a shift towards more culturally safe and clinical practice guideline adherent  
15  
16  
17 97 health care for Indigenous patients.  
18  
19  
20 98

## 21 22 99 **STRENGTHS AND LIMITATIONS OF THIS STUDY**

- 23  
24  
25  
26 100 • Our systematic review was designed and co-led by Indigenous scholars  
27  
28 101 and Indigenous cultural safety education leaders.
- 29  
30  
31  
32 102 • Our systematic review utilized a quality appraisal tool designed by an  
33  
34 103 Indigenous-led research centre in partnership with Indigenous community  
35  
36 104 members.
- 37  
38  
39  
40  
41 105 • The review is limited to ICS programs with evaluations that have been  
42  
43 106 published in the peer reviewed literature and as such, may not have  
44  
45 107 captured the true breadth of existing Indigenous cultural safety training  
46  
47 108 programs and related evaluations.  
48  
49  
50  
51  
52  
53  
54 109

## 110 INTRODUCTION

111 Colonization has long been recognized by Indigenous peoples from around the world as  
112 a cross-cutting and foundational determinant of Indigenous/non-Indigenous health  
113 disparities.(1) More recently, a series of apologies by world leaders has enhanced general  
114 societal awareness of anti-Indigenous colonial injustices, abuses, and harms.(2–5)  
115 Simultaneously, a rapidly growing body of academic scholarship clearly demonstrates  
116 ongoing, widespread, and harmful anti-Indigenous colonial policies and practices that are  
117 rooted in racist ideologies of white supremacy.(6–12)

118  
119 Common manifestations of persistent colonialism include the emergence of deeply rooted  
120 negative anti-Indigenous stereotyping and assumptions in micro level social interactions,  
121 organizational design, and social architecture. In healthcare contexts, this includes: racist  
122 contamination of the healthcare provider-Indigenous patient interface; organizational  
123 level barriers to equitable Indigenous health services access; and Indigenous/settler  
124 imbalances in the distribution of health and social resources. Social media and linked  
125 public reporting have begun to expose the life-threatening severity of explicit attitudinal  
126 anti-Indigenous racism but there can be resistance to acknowledging the underlying  
127 challenges of ongoing implicit and system level failures. For example, Joyce Echequan  
128 was able to record the anti-Indigenous racist disparagement she experienced from  
129 healthcare staff when seeking treatment for a life-threatening illness at the Lanaudiere

1  
2  
3  
4 130 hospital in Joliette, Quebec immediately prior to her death. (13) The behaviours of the  
5  
6 131 individual providers were widely regarded as grossly unacceptable following media  
7  
8  
9 132 reporting. However, the Premier of Quebec refused to acknowledge the role of systemic  
10  
11 133 racism in Joyce's death.(14)

12  
13  
14 134  
15  
16 135 Multiple studies have demonstrated that implicit race preference bias is common among  
17  
18  
19 136 health care providers,(15) even when they explicitly express anti-racist values and  
20  
21  
22 137 attitudes.(16) Further, implicit race preference bias has been linked to differential  
23  
24  
25 138 application of clinical practice guidelines, with non-adherence disproportionately  
26  
27 139 impacting socially excluded racialized and ethnic patient populations.(17)

28  
29  
30 140  
31  
32 141 Not surprisingly, given the broad scope and injurious impacts of anti-Indigenous racism,  
33  
34  
35 142 its interruption in healthcare contexts has emerged as a priority for Indigenous and allied  
36  
37  
38 143 policymakers, practitioners, and researchers. Of the Truth and Reconciliation  
39  
40  
41 144 Commission of Canada's seven Calls to Action in the domain of health, two address the  
42  
43  
44 145 need to provide "cultural competency" training for healthcare providers.(18) These policy  
45  
46  
47 146 recommendations have been accompanied by a rapid growth of interventions designed  
48  
49  
50  
51 147 to interrupt anti-Indigenous racism, primarily through educational interventions for  
52  
53  
54 148 healthcare providers and trainees. Upon engagement with this literature,(19) it became  
55  
56  
57 149 apparent to our team that the approach, content, and evaluations of existing cultural  
58  
59  
60 150 competency trainings vary widely. It was unclear which training approaches and

1  
2  
3  
4 151 strategies were most effective, especially with respect to improving disparities in clinical  
5  
6 152 outcomes.  
7

8  
9 153  
10  
11 154 In order to address these knowledge gaps, we conducted a systematic literature review  
12  
13  
14 155 focused on the design and impacts of existing Indigenous cultural safety and competency  
15  
16 156 training interventions. The primary aim of this review was to identify, appraise and  
17  
18  
19 157 synthesize the design and impacts of these educational interventions on non-Indigenous  
20  
21  
22 158 health care professionals' knowledge, attitudes, and practices. The secondary aim was  
23  
24  
25 159 to investigate whether specific training approaches, strategies, formats, or educational  
26  
27  
28 160 content were more successful, and if yes, for whom and in what ways. To help manage  
29  
30  
31 161 heterogeneity, we restricted this review to Indigenous specific educational interventions  
32  
33  
34 162 in Australia, Canada, New Zealand, and the United States. These globally affluent  
35  
36  
37 163 countries share both relatively well-resourced health and social service systems and  
38  
39  
40 164 history of European colonization that continues to negatively impact the health and  
41  
42  
43 165 wellbeing of First Peoples, including equitable access to these service systems.  
44

45  
46  
47 166

## 48 167 **METHODS**

49 168 The Preferred Reporting Items for Systematic Reviews and Meta-Analyses (PRISMA)  
50  
51 169 2020 statement was used to guide our literature review and reporting.(20) Supplementary  
52  
53  
54 170 Figure 1 documents the process of article screening for inclusion in our analysis. Tables  
55  
56  
57  
58  
59  
60

1  
2  
3  
4  
5  
6  
7  
8  
9  
10  
11  
12  
13  
14  
15  
16  
17  
18  
19  
20  
21  
22  
23  
24  
25  
26  
27  
28  
29  
30  
31  
32  
33  
34  
35  
36  
37  
38  
39  
40  
41  
42  
43  
44  
45  
46  
47  
48  
49  
50  
51  
52  
53  
54  
55  
56  
57  
58  
59  
60

171 1 and 2 summarize key aspects of the included studies: intervention content; participants;  
172 evaluation methods; and study outcomes.  
173

For peer review only

**Table 1. Summary of Interventions**

| Author(s)                          | Year | Country     | Intervention                                                                 | Content Delivery                                                                                               | Setting  | Core Curriculum Topics                                                                                                                                                                                                                                                                                                                                | Participants                                                           |
|------------------------------------|------|-------------|------------------------------------------------------------------------------|----------------------------------------------------------------------------------------------------------------|----------|-------------------------------------------------------------------------------------------------------------------------------------------------------------------------------------------------------------------------------------------------------------------------------------------------------------------------------------------------------|------------------------------------------------------------------------|
| Barajas J.                         | 2021 | USA         | 10 minute online PowerPoint presentation and YouTube video                   | Online module(s)                                                                                               | Online   | Cultural knowledge, spirituality, and beliefs; professional practice issues; interpersonal communication skills                                                                                                                                                                                                                                       | Emergency Department healthcare providers and staff (n=6)              |
| Barnabe C., et al.                 | 2021 | Canada      | Phase I: half-day workshop, and Phase II: full day workshop (6 months later) | Online module(s); interactive group discussions, reflections, and experiential exercises                       | Clinical | Determinants of Indigenous health; oppressive and racist policies, colonization and white racial privilege; specific health focus                                                                                                                                                                                                                     | Rheumatologists (n=34)                                                 |
| Brewer K., McCann C., & Harwood M. | 2020 | New Zealand | 2 self-paced online modules                                                  | Online module(s); self-learning tools; personal reflections                                                    | Online   | Family structures, kinship, and responsibilities; cultural knowledge, spirituality, and beliefs; past policies and practices; determinants of Indigenous health; health disparities; professional practice issues; oppressive and racist policies, colonization and white racial privilege; interpersonal communication skills; specific health focus | Speech Language Therapists (n=11)                                      |
| Chapman R., Martin C., & Smith T.  | 2014 | Australia   | 3 x 2hour workshops over 6 weeks                                             | Didactic lecture; interactive group discussions, reflections, and experiential exercises; personal reflections | Clinical | Cultural knowledge and ideology                                                                                                                                                                                                                                                                                                                       | Emergency Department: nursing, clinical and allied health staff (n=48) |
| Crowshoe L., et al.                | 2018 | Canada      | Full day (8 hours) workshop                                                  | Interactive group discussions, reflections, and experiential exercises                                         | Clinical | Determinants of Indigenous health; professional practice issues; oppressive and racist policies, colonization and white racial privilege; interpersonal communication skills                                                                                                                                                                          | Family physicians and Allied Health Professionals (n=32)               |

|    |                                      |      |           |                                                                                                                     |                                                                                                                |                      |                                                                                                                                                                                                                                                                                                                                         |                                                                                                                            |
|----|--------------------------------------|------|-----------|---------------------------------------------------------------------------------------------------------------------|----------------------------------------------------------------------------------------------------------------|----------------------|-----------------------------------------------------------------------------------------------------------------------------------------------------------------------------------------------------------------------------------------------------------------------------------------------------------------------------------------|----------------------------------------------------------------------------------------------------------------------------|
| 1  | Hinton R., et al.                    | 2014 | Australia | 3 full-day workshops over 2 months                                                                                  | Didactic lecture; interactive group discussions, reflections, and experiential exercises; self-learning tools  | Clinical             | Specific health focus                                                                                                                                                                                                                                                                                                                   | Clinical and Allied Health Staff (n=21)                                                                                    |
| 2  |                                      |      |           |                                                                                                                     |                                                                                                                |                      |                                                                                                                                                                                                                                                                                                                                         |                                                                                                                            |
| 3  |                                      |      |           |                                                                                                                     |                                                                                                                |                      |                                                                                                                                                                                                                                                                                                                                         |                                                                                                                            |
| 4  |                                      |      |           |                                                                                                                     |                                                                                                                |                      |                                                                                                                                                                                                                                                                                                                                         |                                                                                                                            |
| 5  |                                      |      |           |                                                                                                                     |                                                                                                                |                      |                                                                                                                                                                                                                                                                                                                                         |                                                                                                                            |
| 6  | Hulko W., et al.                     | 2021 | Canada    | 8-10 hours of online training over 8-10 weeks, and a full day Storytelling Session and Talking Circle with an Elder | Online module(s); story telling and talking circles; knowledge quiz; personal reflections                      | Online and classroom | Indigenous diversity; family structures, kinship, and responsibilities; cultural knowledge, spirituality, and beliefs; past policies and practices; determinants of Indigenous health; health disparities; professional practice issues; oppressive and racist policies, colonization and white racial privilege; specific health focus | Nurses (n=38)                                                                                                              |
| 7  |                                      |      |           |                                                                                                                     |                                                                                                                |                      |                                                                                                                                                                                                                                                                                                                                         |                                                                                                                            |
| 8  |                                      |      |           |                                                                                                                     |                                                                                                                |                      |                                                                                                                                                                                                                                                                                                                                         |                                                                                                                            |
| 9  |                                      |      |           |                                                                                                                     |                                                                                                                |                      |                                                                                                                                                                                                                                                                                                                                         |                                                                                                                            |
| 10 |                                      |      |           |                                                                                                                     |                                                                                                                |                      |                                                                                                                                                                                                                                                                                                                                         |                                                                                                                            |
| 11 |                                      |      |           |                                                                                                                     |                                                                                                                |                      |                                                                                                                                                                                                                                                                                                                                         |                                                                                                                            |
| 12 |                                      |      |           |                                                                                                                     |                                                                                                                |                      |                                                                                                                                                                                                                                                                                                                                         |                                                                                                                            |
| 13 |                                      |      |           |                                                                                                                     |                                                                                                                |                      |                                                                                                                                                                                                                                                                                                                                         |                                                                                                                            |
| 14 |                                      |      |           |                                                                                                                     |                                                                                                                |                      |                                                                                                                                                                                                                                                                                                                                         |                                                                                                                            |
| 15 | Kerrigan V., et al.                  | 2020 | Australia | Full day (7 hours) workshop                                                                                         | Didactic lecture; interactive group discussions, reflections, and experiential exercises                       | Clinical             | Cultural knowledge, spirituality, and beliefs; past policies and practices; professional practice issues; oppressive and racist policies, colonization and white racial privilege; interpersonal communication skills                                                                                                                   | Hospital staff (n=621)                                                                                                     |
| 16 |                                      |      |           |                                                                                                                     |                                                                                                                |                      |                                                                                                                                                                                                                                                                                                                                         |                                                                                                                            |
| 17 |                                      |      |           |                                                                                                                     |                                                                                                                |                      |                                                                                                                                                                                                                                                                                                                                         |                                                                                                                            |
| 18 |                                      |      |           |                                                                                                                     |                                                                                                                |                      |                                                                                                                                                                                                                                                                                                                                         |                                                                                                                            |
| 19 |                                      |      |           |                                                                                                                     |                                                                                                                |                      |                                                                                                                                                                                                                                                                                                                                         |                                                                                                                            |
| 20 |                                      |      |           |                                                                                                                     |                                                                                                                |                      |                                                                                                                                                                                                                                                                                                                                         |                                                                                                                            |
| 21 |                                      |      |           |                                                                                                                     |                                                                                                                |                      |                                                                                                                                                                                                                                                                                                                                         |                                                                                                                            |
| 22 | Kerrigan V., et al.                  | 2022 | Australia | 7 x 18-20min podcasts (1/week)                                                                                      | Online podcasts; diary entries                                                                                 | Online               | Counterstories; interpersonal communication skills; social justice                                                                                                                                                                                                                                                                      | Physicians (n=16)                                                                                                          |
| 23 |                                      |      |           |                                                                                                                     |                                                                                                                |                      |                                                                                                                                                                                                                                                                                                                                         |                                                                                                                            |
| 24 |                                      |      |           |                                                                                                                     |                                                                                                                |                      |                                                                                                                                                                                                                                                                                                                                         |                                                                                                                            |
| 25 | Liaw S-T., et al.                    | 2015 | Australia | Half day workshop, case study toolkit, and cultural mentors                                                         | Workshop; cultural mentor; self-learning tools                                                                 | Clinical             | Interpersonal communication skills; cultural respect                                                                                                                                                                                                                                                                                    | Clinical practice - solo physician/groups (n=10)                                                                           |
| 26 |                                      |      |           |                                                                                                                     |                                                                                                                |                      |                                                                                                                                                                                                                                                                                                                                         |                                                                                                                            |
| 27 |                                      |      |           |                                                                                                                     |                                                                                                                |                      |                                                                                                                                                                                                                                                                                                                                         |                                                                                                                            |
| 28 | Liaw S-T., et al.                    | 2019 | Australia | Half day workshop, case study toolkit, and cultural mentor                                                          | Workshop; cultural mentor; self-learning tools                                                                 | Clinical             | Interpersonal communication skills; cultural respect                                                                                                                                                                                                                                                                                    | General practice clinics (n=56); general practitioner physicians (n=334); practice managers (n=56); practice nurses (n=93) |
| 29 |                                      |      |           |                                                                                                                     |                                                                                                                |                      |                                                                                                                                                                                                                                                                                                                                         |                                                                                                                            |
| 30 |                                      |      |           |                                                                                                                     |                                                                                                                |                      |                                                                                                                                                                                                                                                                                                                                         |                                                                                                                            |
| 31 |                                      |      |           |                                                                                                                     |                                                                                                                |                      |                                                                                                                                                                                                                                                                                                                                         |                                                                                                                            |
| 32 | Sauvé A., Cappelletti A., & Murji L. | 2022 | Canada    | Half-day in-person simulation workshop                                                                              | Simulation training                                                                                            | Clinical             | Determinants of Indigenous health; professional practice issues; oppressive and racist policies, colonization and white racial privilege                                                                                                                                                                                                | Physicians (Family Medicine Residents) (n=29)                                                                              |
| 33 |                                      |      |           |                                                                                                                     |                                                                                                                |                      |                                                                                                                                                                                                                                                                                                                                         |                                                                                                                            |
| 34 |                                      |      |           |                                                                                                                     |                                                                                                                |                      |                                                                                                                                                                                                                                                                                                                                         |                                                                                                                            |
| 35 |                                      |      |           |                                                                                                                     |                                                                                                                |                      |                                                                                                                                                                                                                                                                                                                                         |                                                                                                                            |
| 36 |                                      |      |           |                                                                                                                     |                                                                                                                |                      |                                                                                                                                                                                                                                                                                                                                         |                                                                                                                            |
| 37 | Wheeler A., et al.                   | 2021 | Australia | 1.5 hour online module, and a full day in-person workshop (2-3 weeks later)                                         | Online module(s); interactive group discussions, reflections, and experiential exercises; personal reflections | Online and classroom | Health disparities; professional practice issues; interpersonal communication skills                                                                                                                                                                                                                                                    | Pharmacists (n=39)                                                                                                         |
| 38 |                                      |      |           |                                                                                                                     |                                                                                                                |                      |                                                                                                                                                                                                                                                                                                                                         |                                                                                                                            |
| 39 |                                      |      |           |                                                                                                                     |                                                                                                                |                      |                                                                                                                                                                                                                                                                                                                                         |                                                                                                                            |
| 40 |                                      |      |           |                                                                                                                     |                                                                                                                |                      |                                                                                                                                                                                                                                                                                                                                         |                                                                                                                            |
| 41 |                                      |      |           |                                                                                                                     |                                                                                                                |                      |                                                                                                                                                                                                                                                                                                                                         |                                                                                                                            |
| 42 |                                      |      |           |                                                                                                                     |                                                                                                                |                      |                                                                                                                                                                                                                                                                                                                                         |                                                                                                                            |
| 43 |                                      |      |           |                                                                                                                     |                                                                                                                |                      |                                                                                                                                                                                                                                                                                                                                         |                                                                                                                            |
| 44 |                                      |      |           |                                                                                                                     |                                                                                                                |                      |                                                                                                                                                                                                                                                                                                                                         |                                                                                                                            |
| 45 |                                      |      |           |                                                                                                                     |                                                                                                                |                      |                                                                                                                                                                                                                                                                                                                                         |                                                                                                                            |
| 46 |                                      |      |           |                                                                                                                     |                                                                                                                |                      |                                                                                                                                                                                                                                                                                                                                         |                                                                                                                            |
| 47 |                                      |      |           |                                                                                                                     |                                                                                                                |                      |                                                                                                                                                                                                                                                                                                                                         |                                                                                                                            |

**Table 2. Summary of Evaluation and Outcomes**

| Citation                                 | Study design                       | Method                                                                                                                                  | Tool(s)                                                                                                                                 | Reported Outcome(s)                                                                                                                                                    |
|------------------------------------------|------------------------------------|-----------------------------------------------------------------------------------------------------------------------------------------|-----------------------------------------------------------------------------------------------------------------------------------------|------------------------------------------------------------------------------------------------------------------------------------------------------------------------|
| Barajas J. 2021.                         | Mixed methods, quality improvement | Post-survey                                                                                                                             | 7 dichotomous (yes/no); 2 open-ended questions                                                                                          | Positive impact on insights, knowledge, and anticipated behaviour change.                                                                                              |
| Barnabe C., et al. 2021.                 | Mixed methods                      | Pre- (1 week pre-intervention) and post-survey (3 months post-intervention). Satisfaction survey (1 week post-intervention)             | Social Cultural Confidence in Care Scale (SCCCS); free-text questions; Experience survey                                                | Significant change in knowledge, skills, and approach to social and cultural factors. Intervention was reported as being relevant and meeting expectations.            |
| Brewer K., McCann C., & Harwood M. 2020. | Qualitative longitudinal           | Post-survey. Follow-up interview (6 months post-intervention)                                                                           | Course feedback; structured interviews                                                                                                  | Major themes of "putting it into practice" and "keeping it at the forefront."                                                                                          |
| Chapman R., Martin C., & Smith T. 2014.  | Quantitative                       | Pre- and post-survey                                                                                                                    | Area human resources development/population health survey of participation in Aboriginal awareness training workshop                    | Some change of perceptions towards ATSI people. Small effect on familiarity. No effect on attitudes.                                                                   |
| Crowshoe L., et al. 2018.                | Mixed methods                      | Pre- (1 week pre-intervention) and post-survey (3 months post-intervention). Participant observations. Intervention satisfaction survey | Onsite satisfaction evaluation; observations of participant engagement with content on day; online survey                               | Significant improvement in knowledge, skills, awareness, confidence, and approach to patient care. Strong agreement that the workshop met objectives and expectations. |
| Hinton R., et al. 2014.                  | Mixed methods, action-oriented     | File audit                                                                                                                              | 2009 vs. 2011 audit of inpatient files                                                                                                  | Some improvements to the quality of recovery-oriented care, as shown through an increase in recording client social history, family issues, and cultural factors.      |
| Hulko W., et al. 2021.                   | Mixed methods, community-based     | Pre- and post -surveys, knowledge quizzes, and case study care planning. Talking Circles.                                               | Approaches to Dementia Questionnaire; Indigenous Cultural Competency Knowledge Quiz; care plans for "Alice;" Talking Circle transcripts | Improvement in the knowledge, skills, and values of the nurse participants. Storytelling sessions were reported as being effective at building capacity.               |



1  
2  
3  
4  
5  
6  
7  
8  
9  
10  
11  
12  
13  
14  
15  
16  
17  
18  
19  
20  
21  
22  
23  
24  
25  
26  
27  
28  
29  
30  
31  
32  
33  
34  
35  
36  
37  
38  
39  
40  
41  
42  
43  
44  
45  
46  
47

|                                            |                                   |                                                                                                          |                                                                                                                                                                 |                                                                                                                                                                                                                                                                     |
|--------------------------------------------|-----------------------------------|----------------------------------------------------------------------------------------------------------|-----------------------------------------------------------------------------------------------------------------------------------------------------------------|---------------------------------------------------------------------------------------------------------------------------------------------------------------------------------------------------------------------------------------------------------------------|
| Kerrigan V., et al. 2020.                  | Mixed methods                     | Post-survey                                                                                              | Likert-scale questions on Quality of Training; free-text questions                                                                                              | Provided good to excellent information provided on all topics. Participants wanted further and more specific cultural education opportunities.                                                                                                                      |
| Kerrigan V., et al. 2022.                  | Qualitative, participatory action | Qualitative journal entries. Post-intervention interviews                                                | Weekly reflections; feedback interviews                                                                                                                         | Raised the critical consciousness of participants leading to self-reported attitudinal and behaviour change.                                                                                                                                                        |
| Liaw S-T., et al. 2015.                    | Mixed methods, pragmatic          | Pre- and post-surveys and patient file audits (6 months post-intervention). Post-intervention interviews | Cultural Quotient questionnaire; file audit of health checks and clinical risk factors managed; follow-up interviews with staff, cultural mentors, and patients | Clinical practices improved their readiness to provide culturally appropriate care. Individual clinic staff improved their cultural strategic thinking.                                                                                                             |
| Liaw S-T., et al. 2019.                    | Mixed methods, cluster RCT        | File audit. Pre- and post-survey (12 months post-intervention)                                           | Cultural Quotient questionnaire; audit of rates of healthcare claims and chronic disease risk factors.                                                          | No significant change in Indigenous health check rates or cultural quotient scores.                                                                                                                                                                                 |
| Sauvé A., Cappelletti A., & Murji L. 2022. | Quantitative                      | Pre- and post-survey                                                                                     | abridged Scale of Ethnocultural Empathy (aSEE)                                                                                                                  | Significant increase in empathy, knowledge of Indigenous SDOH, and motivation to engage with Indigenous patients in a culturally safe manner.                                                                                                                       |
| Wheeler A., et al. 2021.                   | Mixed methods                     | Pre- and post-survey. Training acceptability survey                                                      | Cultural Capability Measurement Tool (CCMT); additional adapted questions; acceptability survey                                                                 | Significant improvement in cultural capability, confidence, and skills. Significant change in motivation to improve health outcomes for Indigenous patients and reduce barriers. Acceptability of the intervention and perceived value-add to participant practice. |

view only

## 176 **Search strategy**

177 Consistent with the search methods outlined in the Cochrane Handbook for systematic  
178 reviews,(21) an Information Specialist (CZ) conducted database searches in Ovid  
179 Medline, Embase, PsycINFO, CINAHL, Cochrane Central Register of Controlled Trials,  
180 Cochrane Database of Systematic Reviews, Bibliography of Indigenous People in North  
181 America, Applied Social Sciences Index & Abstracts, ERIC (Education Resources  
182 Information Center), International Bibliography of the Social Sciences, ProQuest  
183 Dissertations & Theses Global, Sociological Abstracts, and Web of Science's Social  
184 Sciences Citation Index and Science Citation Index. Search strategies were adapted for  
185 each database and used a comprehensive combination of subject headings and  
186 keywords for the concepts of Indigenous people, cultural competence and health  
187 professionals' education. Databases were searched for English language records from  
188 2006 to May 12, 2022 and uploaded into Colandr.(22) The reference lists of seminal texts  
189 and review articles were then reviewed for additional records. An additional 3 articles  
190 were identified for study inclusion. For the detailed search strategies see Supplementary  
191 Figure 2.

## 193 **Study screening**

194 Two independent reviewers screened all title and abstracts for full text review using the  
195 following inclusion criteria:

1  
2  
3  
4 196 (1) Study specific to Indigenous contexts in what is now known as Australia, Canada,  
5  
6 197 New Zealand, and/or the United States of America;

8  
9 198 (2) Study describes educational interventions (workshops, training, coursework,  
10  
11 199 community visits, etc.) designed/implemented to improve cultural safety, cultural  
12  
13  
14 200 competency, and/or cultural awareness;

16  
17 201 (3) Educational intervention focused on a majority of non-Indigenous adult participants  
18  
19 202 health care professionals who provide services (e.g., health or social services) to  
20  
21  
22 203 Indigenous peoples.

23  
24  
25 204

26  
27 205 In the event that there was not enough information in the abstract to determine inclusion  
28  
29  
30 206 according to these 3 criteria, or the independent reviewers did not agree on inclusion, the  
31  
32 207 full text was retrieved for review and joint decision making.

33  
34  
35 208

36  
37 209 Three researchers collaborated on full-text screening and further eliminated articles that  
38  
39  
40 210 did not meet the primary screening criteria and two additional secondary screening  
41  
42  
43 211 criteria. These additional screening criteria required that the article contain: (i) detailed  
44  
45 212 information about the educational intervention's design and implementation; (ii) defined  
46  
47  
48 213 evaluation outcomes. As per our inclusion criteria, we excluded studies in which the  
49  
50  
51 214 majority of the learners were Indigenous and/or the focus of the intervention was at the  
52  
53 215 organizational versus health care provider level. We additionally excluded train-the-  
54  
55  
56 216 trainer interventions in which the participants were not directly providing health services.

1  
2  
3  
4 2175  
6 218 **Data Abstraction and Quality Appraisal**  
7

8  
9 219 Three researchers collaborated on data abstraction across the following categories:  
10  
11 220 study methods (design, evaluation methods and tools, participants,  
12  
13  
14 221 sampling/recruitment), study population, sampling and recruitment methods, educational  
15  
16 222 intervention design (pedagogy, content, modifications) and outcomes (individual and  
17  
18  
19 223 system level).

20  
21  
22 224 Two independent reviewers completed preliminary data abstraction and the lead author  
23  
24 225 (BJH) subsequently reviewed all abstractions and finalized Tables 1-3. The lead and  
25  
26  
27 226 senior authors (BJH, JS) independently appraised methodological quality using a tailored  
28  
29 227 version of the Well Living House quality appraisal tool (WLHQAT) (23–25)  
30  
31 228 (Supplementary Figure 3) and subsequently met to discuss and reach consensus on  
32  
33  
34 229 scores. WLHQAT includes three equally weighted assessment domains: local  
35  
36  
37 230 Indigenous community relevance of methods; rigor and validity; and strength of evidence  
38  
39  
40 231 and has a maximum total score of 12. Studies with a total score of <7 were not included  
41  
42  
43 232 in the full synthesis. The interdisciplinary nature of included studies added complexity to  
44  
45 233 the quality appraisal, in that the research team, study design, concepts and priorities, data  
46  
47  
48 234 collection, and measures were wide-ranging.

49  
50 235  
51  
52  
53  
54  
55  
56  
57  
58  
59  
60

**Table 3: Summary of Indigenous Inclusion**

| Citation                                   | Study Design | Curriculum Development | Curriculum Delivery | Curriculum Evaluation | Study Analysis | Dissemination | Positionality |
|--------------------------------------------|--------------|------------------------|---------------------|-----------------------|----------------|---------------|---------------|
| Barajas J. 2021.                           | Yes          | Yes                    | None listed         | Yes                   | Yes            | Yes           | Yes           |
| Barnabe C., et al. 2021.                   | Yes          | Yes                    | Yes                 | Yes                   | Yes            | Yes           | Yes           |
| Brewer K., McCann C., & Harwood M. 2020.   | None listed  | Yes                    | None listed         | None listed           | None listed    | Yes           | None listed   |
| Chapman R., Martin C., & Smith T. 2014.    | None listed  | None listed            | Yes                 | None listed           | None listed    | None listed   | None listed   |
| Crowshoe L., et al., 2018.                 | Yes          | Yes                    | Yes                 | Yes                   | Yes            | Yes           | Limited       |
| Hinton R., et al. 2014.                    | None listed  | None listed            | None listed         | None listed           | None listed    | None listed   | None listed   |
| Hulko W., et al. 2021.                     | Yes          | Yes                    | Yes                 | Yes                   | Yes            | Yes           | Yes           |
| Kerrigan V., et al., 2020.                 | Yes          | Yes                    | Yes                 | Yes                   | Yes            | Yes           | Yes           |
| Kerrigan V., et al., 2022.                 | Yes          | Yes                    | Yes                 | Yes                   | Yes            | Yes           | Yes           |
| Liaw S-T., et al. 2015.                    | None listed  | Yes                    | Limited             | Yes                   | None listed    | None listed   | None listed   |
| Liaw S-T., et al. 2019.                    | None listed  | Yes                    | Limited             | Yes                   | None listed    | None listed   | None listed   |
| Sauvé A., Cappelletti A., & Murji L. 2022. | Yes          | Yes                    | Yes                 | None listed           | None listed    | None listed   | None listed   |
| Wheeler A., et al. 2021.                   | Yes          | Yes                    | Yes                 | Yes                   | None listed    | None listed   | None listed   |

1  
2  
3  
4 2375  
6 238 **Synthesis**

7  
8  
9 239 We applied an iterative narrative approach to our synthesis.(26) This method was a good  
10  
11 240 fit with the heterogeneity of study designs and outcomes and our secondary aim to  
12  
13  
14 241 understand which specific training approaches were impactful for whom and in what  
15  
16 242 ways. In addition to our primary aim of identifying, summarizing, and assessing the  
17  
18  
19 243 design and outcomes of existing published evaluations of Indigenous cultural safety  
20  
21  
22 244 education programming for health care professionals, we were particularly interested in  
23  
24 245 documenting underlying pedagogies, instructional strategies, formats, and content and  
25  
26  
27 246 how these might be related to program success across participant groups and contexts.  
28  
29  
30 247 We were also interested in the involvement of Indigenous instructors and Indigenous  
31  
32 248 communities and how this might have contributed to program success.

33  
34  
35 249

36  
37  
38 250 The lead author led the synthesis of study design, participants, quality, and outcomes,  
39  
40 251 drawing on data abstraction and with regular input from the other authors. Refinement of  
41  
42  
43 252 secondary narratives regarding (i) the role of underlying pedagogies and (ii) Indigenous  
44  
45 253 instructor and community involvement was achieved through iterative discussion of  
46  
47  
48 254 independently identified themes among the authorship team followed by in depth re-  
49  
50  
51 255 examination of the included studies by the first author.

52  
53 256 Throughout the analysis, we applied a critical decolonizing lens where we intentionally  
54  
55  
56 257 centered the distinct and diverse knowledges and strengths present in Indigenous

1  
2  
3  
4 258 communities' practices of health and wellbeing. (27–30) The authors sought to  
5  
6 259 acknowledge and critique the systemic power dynamics that so often inform existing  
7  
8  
9 260 health program evaluation models, particularly when applied to oppressed populations,  
10  
11 261 including Indigenous peoples in what is now known as Australia, Canada, New Zealand  
12  
13  
14 262 and the United States. In so doing, we applied foundational Indigenous principles, the 5  
15  
16 263 R's: relationships, reciprocity, responsibility, respect, and, relevance,(31,32) all of which  
17  
18  
19 264 are critical to the formation of space in which to consider and critique the inclusion (or  
20  
21  
22 265 lack thereof) of Indigenous knowledges and practices in evaluation. Research that looks  
23  
24  
25 266 to learn about Indigenous experiences of health programs and policies requires  
26  
27 267 acknowledging the unique and distinct relations and interconnections held by Indigenous  
28  
29  
30 268 peoples that are so often decontextualized through the application of Western  
31  
32 269 methodologies.(23) In keeping with this approach, it is important for us to self-locate the  
33  
34  
35 270 authorship team as comprised of two Indigenous women (JS, DS), one racialized settler  
36  
37 271 ally (BJH), and two non-racialized settler allies (SF, CZ).  
38  
39

40 272

## 41 42 43 273 **RESULTS**

### 44 45 274 **Literature search**

46  
47  
48 275 The literature search strategy resulted in 2,442 citations (following removal of any  
49  
50  
51 276 duplicates), from which 2,250 were deemed ineligible based on title and abstract  
52  
53  
54 277 screening. 192 articles were selected for full text review from which 176 were excluded  
55  
56  
57  
58  
59

1  
2  
3  
4 278 based on: the primary inclusion criteria (1-3) and the secondary inclusion criteria (i)  
5  
6 279 (n=147); or secondary inclusion criteria (ii) (n=29). (Supplementary Figure 1) We were  
7  
8  
9 280 left with 16 unique studies that described and evaluated Indigenous cultural safety training  
10  
11 281 for health professionals and were deemed eligible for full synthesis inclusion.(33–48)

12  
13  
14 282

### 15 16 283 **Quality Appraisal**

17  
18  
19 284 Among the 16 studies that were included, 3 scored <7 on the WLHQAT.(38,39,46) These  
20  
21  
22 285 studies were excluded from the synthesis. Lower scores reflected a combination of the  
23  
24  
25 286 following: limited, to no involvement of Indigenous community partners in the evaluation;  
26  
27 287 inadequate sample size and/or lack of participant uptake and/or retention in the  
28  
29  
30 288 evaluation; and/or weak evaluation study design.(39,46) For instance, a low score could  
31  
32  
33 289 reflect that Indigenous scholars or community members were involved in the design  
34  
35 290 and/or delivery of the training program but not in the design and/or implementation of the  
36  
37  
38 291 evaluation. Another study did not triangulate their qualitative study results.(38)

39  
40 292

### 41 42 43 293 **Study and population characteristics**

44  
45 294 The 13 analyzed studies were published between 2014 – 2022. The majority (n=7) were  
46  
47  
48 295 conducted in Australia.(36,40,42–45,48) A smaller number (n=4) took place in  
49  
50  
51 296 Canada.(34,37,41,47) Of the last two studies, one (n=1) was conducted in the United  
52  
53  
54 297 States (US)(33) and the other (n=1) was conducted in New Zealand (n=1).(35)

55  
56 298



1  
2  
3  
4 299 Evaluation design varied widely. Nine of the studies (n = 9) applied mixed methods  
5  
6 300 (33,34,37,40–42,44,45,48) including various combinations of surveys, open ended  
7  
8  
9 301 questions, semi-structured interviews, and talking circles. One of these was a  
10  
11 302 randomized trial that incorporated a participatory action research approach, in which the  
12  
13  
14 303 research team cooperated with the communities, supporting institutions and  
15  
16 304 participants.(45) Two (n=2) studies were qualitative. (35,43) Another two (n=2) were  
17  
18  
19 305 quantitative.(36,47) Eight studies (n=8) incorporated pre/post intervention  
20  
21  
22 306 surveys.(34,36,37,41,44,45,47,48) Six of the studies (n=6) incorporated some measure  
23  
24  
25 307 of longer-term impact as part of the evaluation with varied follow-up periods: across 3  
26  
27 308 years (40); 12 months (45); 6 months (35,44); and 3 months.(34,37) The remainder of the  
28  
29  
30 309 studies (n=7) collected post intervention data immediately following the intervention. One  
31  
32 310 intervention was described and evaluated across multiple publications as part of a larger  
33  
34  
35 311 research program.(44,45) Most (n=10) but not all of the studies, provided access to  
36  
37  
38 312 and/or a detailed description of their evaluation tools.(33–37,40,44,45,47,48) Of the  
39  
40  
41 313 eleven studies that used survey tools, eight employed previously validated evaluation  
42  
43 314 tools, (34,36,37,41,44,45,47,48) two of these, although validated, were adapted by the  
44  
45 315 research team.(37,47)

46  
47  
48 316  
49  
50 317 Sample sizes varied widely, ranging from 6 to 621, and studies took place in various  
51  
52  
53 318 settings. The majority (n=8) occurred in clinical settings and the remainder were either  
54  
55  
56 319 online (n=3) or a mix of online and in a classroom (n=2). Three of the studies (n=3)

1  
2  
3  
4 320 recruited specialized practitioners: rheumatologists (34), pharmacists (48), and speech  
5  
6 321 language therapists (35). One study recruited only family medicine residents (47)  
7  
8  
9 322 whereas another focussed on nurses .(41) Four of the studies (n=4) delivered  
10  
11 323 interventions tailored to providers serving a specific health service user population:  
12  
13  
14 324 arthritis (34), psychiatric care and mental health (40); residential care (41), and Māori  
15  
16 325 adults with aphasia .(35)  
17  
18

19 326  
20  
21

### 22 327 **Reported Impacts of Indigenous Cultural Safety Education or Training**

23  
24 328 Study outcomes were almost exclusively learner focused (n=10) and included learner  
25  
26  
27 329 self-reports regarding: quality of the learning experience; changes in knowledge or  
28  
29  
30 330 awareness; shifts in beliefs; attitudes regarding Indigenous peoples and their care  
31  
32 331 experiences; and/or confidence and skill to care for Indigenous peoples.(33–37,41–  
33  
34  
35 332 43,47,48) (Table 2) A subset of learner focused studies (n=4) included measures of self-  
36  
37 333 reported changes in practice.(34,35,41,43) These impacts were assessed using proxy  
38  
39  
40 334 measures of clinical behaviour including post-intervention interviews with learners  
41  
42  
43 335 (35,43), or through the use of scenarios(34) or vignette-based care plans.(41). Although  
44  
45 336 many of the studies reported significant changes in participants' attitudes, knowledge  
46  
47  
48 337 and awareness, these findings were tempered by limitations in study design and  
49  
50  
51 338 implementation, such as self-selection bias,(34–36,41–43,47,48) small sample size, low  
52  
53 339 uptake and retention,(33–35,37,43,47,48) the lack of randomization and/or controls (all,  
54  
55  
56 340 except for(45)) and potential social desirability response bias.(35) Conclusions regarding  
57  
58  
59

1  
2  
3  
4 341 sustained impact over time, were limited by a paucity of studies (n=6) that included  
5  
6 342 longitudinal measurements.(34,35,37,40,44,45)  
7

8  
9 343  
10  
11 344 Few studies reported on clinical outcomes, and most were based on self-assessments  
12  
13  
14 345 (n=4) as described above.(34,35,41,43) Three studies described externally-assessed,  
15  
16 346 patient-based practice outcomes through the use of file audits (40,44,45) and qualitative  
17  
18  
19 347 interviews with patients at the participating clinics.(44) Of note, the one study that  
20  
21  
22 348 included a randomized control and externally assessed, patient-based practice outcomes  
23  
24 349 did not demonstrate any significant intervention impact.(45)  
25  
26

27 350  
28  
29 351 Terminology varied widely across the studies, a phenomenon that has already been  
30  
31  
32 352 described elsewhere by Curtis et al (49) as negatively impacting the quality of the  
33  
34  
35 353 evaluations and the ability to draw evidence-based comparisons. Some studies referred  
36  
37 354 to cultural safety(33,35,41,43) while others used terms such as: cultural awareness,(42)  
38  
39  
40 355 cultural security,(40) cultural respect, (44,45) cultural competency(35–37), cultural  
41  
42  
43 356 humility,(34) cross-cultural education and cultural capability, (48) and intercultural  
44  
45 357 empathy.(47) A few studies relied upon proxy measures to assess cultural safety. For  
46  
47  
48 358 example, Crowshoe et al(37) described an increase in learners' "confidence" as a proxy  
49  
50  
51 359 for cultural safety. Kerrigan et al(42) focused on behaviour change and self-reported  
52  
53 360 aspiration as indicative of positive clinical outcomes, and noted that although "it was  
54  
55  
56 361 impossible to assess" whether their intervention shifted behaviour, they could "surmise

1  
2  
3  
4 362 that health professionals aspire to transfer learning to the workplace.”(42)p7) Similarly,  
5  
6 363 in a later paper, Kerrigan and colleagues (43) suggested, based upon post intervention  
7  
8 364 interviews with learners, that “[D]octors changed behaviour in relation to building rapport  
9  
10  
11 365 with patients, asking patients questions, working with Aboriginal interpreters, gaining  
12  
13  
14 366 informed consent.” (p13) In conclusion they noted that there is “still a need to assess if  
15  
16 367 training improves patient experience and outcomes” (p14) to determine whether the  
17  
18  
19 368 intervention improved cultural safety.(43) A few authors reflected on the overall  
20  
21  
22 369 limitations of their findings, suggesting that they were not generalizable and/or that  
23  
24 370 additional research is required. (33,41,42,47) Hulko and colleagues(41) indicated that  
25  
26  
27 371 their intervention and evaluation was based upon Secwepemc ways of knowing and being  
28  
29  
30 372 and doing and as such could not be scaled up whereas Barajas(33) acknowledged the  
31  
32 373 value of specificity and context and warned against developing and implementing training  
33  
34  
35 374 programs through a pan-Indigenous approach.  
36  
37  
38  
39

#### 40 376 **Training approaches and methods**

41  
42  
43 377 Theoretical frameworks and pedagogical approaches were manifold. Studies referenced  
44  
45 378 transformative learning theories(34,43,47); social-constructivist frameworks (40);  
46  
47  
48 379 diffusion of innovation theory (33); a public health framework (35); and, Educating for  
49  
50  
51 380 Equity (E4E) (34,37). Liaw et al(44,45) describe a trans-theoretical approach in which  
52  
53 381 they harmonised cultural intelligence frameworks, developments in cultural respect,  
54  
55  
56 382 safety and competence and a review of successful Aboriginal programs alongside  
57  
58  
59  
60

1  
2  
3  
4 383 consultation with Aboriginal communities and others. Others (n=4) designed their  
5  
6 384 program with cultural safety and decolonizing philosophies at their core.(35,36,42,43) For  
7  
8  
9 385 example, Kerrigan et al(42) place the responsibility for change on the “hegemonic  
10  
11 386 individuals and institutions.”(42) p3) Only one paper explicitly cited critical race theory  
12  
13  
14 387 (43) as a core component. A limited number (n=3) did not cite a conceptual theory or  
15  
16 388 framework and instead reviewed cultural safety, competency and awareness in health  
17  
18  
19 389 care training and the possible benefits related to training programs.(36,41,48) Lastly,  
20  
21  
22 390 some of the training programs applied participatory action approaches or community-  
23  
24 391 based approaches to the development and delivery of the training.(40,41,43–45)  
25  
26  
27 392  
28  
29  
30 393 Participation for all programs was voluntary. Overall, there were similarities in course  
31  
32 394 content across programs. Training delivery modalities varied and included combinations  
33  
34  
35 395 of online modules, didactic lectures, interactive group discussions, workshops,  
36  
37  
38 396 simulations, and reflections. (Table 1) Only one was delivered as a series of online  
39  
40 397 podcasts (n=1), an approach which was well-received by learners.(43) Although some in-  
41  
42  
43 398 person trainings (n=3) were delivered by non-Indigenous instructors,(40,44,45) most  
44  
45 399 (n=7) were co-delivered/facilitated by a mix of Indigenous and non-Indigenous facilitators  
46  
47  
48 400 (34,37,41,47) or delivered only by Indigenous facilitator(s)/instructor(s) (Table  
49  
50  
51 401 3).(36,42,48) Some of the more innovative approaches incorporated story-telling and  
52  
53 402 talking circles with Elders (41); podcasts developed and voiced by Elders (43); and,  
54  
55  
56 403 simulation training facilitated with Indigenous community members.(47) Liaw et al(44,45)

1  
2  
3  
4 404 delivered an integrative program, Ways of Thinking, Ways of Doing, which in addition to  
5  
6 405 a short workshop, participants were also provided with a case study reference toolkit and  
7  
8  
9 406 a cultural mentor.

10  
11 407  
12  
13  
14 408 With one exception,(45) all of the training programs reported some level of impact, though  
15  
16 409 only a few of the authors linked the observed impact to their training approaches and  
17  
18  
19 410 methods. Some directly attributed action-oriented (40,44,45) and community-  
20  
21  
22 411 based(33,41,47) approaches to the impact of the interventions. However, the same  
23  
24  
25 412 authors also noted that the participatory components to the learning materials were not  
26  
27  
28 413 incorporated consistently (e.g. AIMhi care plans and engagement of Aboriginal Mental  
29  
30 414 Health Workers (40) and cultural mentors(45)). Crowshoe et al(37) suggested that the  
31  
32 415 impact of their training program was related to “interactive educational techniques and  
33  
34  
35 416 intentional facilitation strategies”(p54) including a combination of Indigenous and non-  
36  
37  
38 417 Indigenous facilitators. Notably, this study had a high drop-out rate with less than half of  
39  
40 418 the registered learners completing the post-survey.(37) Chapman and colleagues,(36)  
41  
42  
43 419 who applied a multi-modal training delivered by an Indigenous trainer, described how the  
44  
45  
46 420 impact of their training program was limited to significant changes in learners’ perceptions  
47  
48  
49 421 whereas learners’ attitudes remained unchanged. Kerrigan and colleagues’(43) claimed  
50  
51 422 their online Elder podcast changed both learner attitudes and behaviours among a small,  
52  
53  
54 423 convenience sample of 14 learners, based on the analysis of semi-structured interviews  
55  
56 424 post-intervention.

1  
2  
3  
4 4255  
6 426 **Indigenous community understandings of measures of success**

7  
8  
9 427 Indigenous cultural safety can only truly be assessed through the lens of Indigenous  
10  
11 428 patients and communities who ultimately are the recipients of clinical care.(50) It follows  
12  
13  
14 429 that Indigenous patient and community understandings and measures of success are  
15  
16 430 critical to assessing the impact of any Indigenous cultural safety training program.  
17  
18  
19 431 However, the degree of involvement of local Indigenous people and communities in the  
20  
21 432 development, implementation, and evaluation of the educational interventions was limited  
22  
23  
24 433 overall and differed across the studies. Table 3 (Indigenous Inclusion) provides a  
25  
26 434 summary overview. Six out of the thirteen peer reviewed papers included statements  
27  
28  
29 435 describing the ethnic and/or Indigenous identity of the authors. Of these, half (n=3)  
30  
31 436 covered the entire authorship(33,41,43) and the remainder (n=3) limited self-location to  
32  
33  
34 437 Indigenous co-authors.(34,37,42) For the most part, Indigenous individuals and/or  
35  
36  
37 438 community members contributed to the development and delivery of the curriculum, either  
38  
39  
40 439 as members of the research team or as local Indigenous community members engaged  
41  
42  
43 440 through participatory and partnered approaches.

44  
45 441

46  
47  
48 442 Contributions by local Indigenous communities to study evaluations, were far more  
49  
50  
51 443 limited, and rarely drew upon health care delivery and/or patient experience. Some  
52  
53 444 established partnerships with Indigenous run organizations(44,45) whereas others relied  
54  
55  
56 445 upon survey tools that were developed in partnership with Indigenous advisors and

1  
2  
3  
4 446 communities,(36,48) however, these were not always locally informed. Others involved  
5  
6 447 Indigenous Elders in the evaluation process.(41,43) In these examples, the Elders were  
7  
8  
9 448 involved in both the development and the evaluation of the curriculum. Lastly, only one  
10  
11 449 evaluation focused on health care delivery and/or patient experience and included  
12  
13  
14 450 interviews with Indigenous patients and cultural mentors. (44)  
15  
16  
17 451

## 19 452 **DISCUSSION**

22 453 The rapid growth of Indigenous cultural safety training for health care professionals is  
23  
24 454 linked to a global movement to interrupt Indigenous/non-Indigenous health inequities,  
25  
26  
27 455 which are rooted in persistent colonial attitudes and systems, including anti-Indigenous  
28  
29  
30 456 stereotyping and racism. (51)The majority of the papers included here provide a rich  
31  
32 457 description of Indigenous cultural safety training program approaches, content, and  
33  
34  
35 458 implementation. In contrast, analysis and synthesis of the accompanying evaluations of  
36  
37  
38 459 these same training programs revealed clear and cross-cutting gaps in the demonstration  
39  
40 460 of clinical and/or system level impacts, even though these are commonly referenced as  
41  
42  
43 461 desired outcomes. The majority of evaluations were limited in focus to learner  
44  
45 462 experiences and self-reported practice outcomes. For example, Kerrigan and  
46  
47  
48 463 colleagues(43); Brewer and colleagues (35) and Barajas (33) all suggested, through their  
49  
50  
51 464 evaluations, that the training programs resulted in changes in self-reported behaviour and  
52  
53 465 as such, intention and practice. These outcomes however, are subject to self-reporting  
54  
55  
56  
57  
58  
59  
60



1  
2  
3  
4 466 response bias such as social desirability. While many of the studies were able to  
5  
6 467 demonstrate some level of impact on knowledge and attitudes towards Indigenous  
7  
8  
9 468 peoples by learners, none of these studies were able to establish an observable impact  
10  
11 469 with respect to a shift towards more culturally safe and clinical practice guideline adherent  
12  
13  
14 470 health care for Indigenous patients.  
15

16  
17 471

18  
19 472 **Evidence of shifts in knowledge and attitudes; but evidence-base is limited**  
20

21  
22 473 Self-reported shifts in knowledge and attitudes regarding Indigenous peoples did improve  
23  
24 474 across most of the studies.(33–37,41–43,47,48) Although limited, two of the studies  
25  
26  
27 475 suggested that these shifts may be sustained over time.(34,35) However, when  
28  
29  
30 476 considering the stated impact of these studies, it is also important to take into account the  
31  
32 477 many limitations inherent in the study design. Evaluation studies relied upon voluntary  
33  
34  
35 478 self-selection. Sample sizes were generally small and those that were longitudinal  
36  
37  
38 479 showed significant baseline to post-intervention loss to follow-up. Eight of the thirteen  
39  
40 480 evaluations involved pre-post assessments involving surveys and/or focus  
41  
42  
43 481 groups.(34,36,37,41,44,45,47,48) Only one of these included a control group.(45) In  
44  
45 482 addition, only 8 of the studies included validated quantitative surveys that employed  
46  
47  
48 483 scales.(34,36,37,41,44,45,47,48) As a result, the shifts in knowledge and attitudes can  
49  
50  
51 484 'at best' be correlated with the described intervention and are limited by several biases  
52  
53 485 arising from the dynamics of course evaluation and marking, participant optimism and in  
54  
55  
56 486 some instances, the lack of anonymity as well as voluntary and low response rates. For  
57  
58  
59

1  
2  
3  
4 487 the most part, when the described impact was an observable increase in knowledge or  
5  
6 488 shift in attitudes, studies also tended to focus on participant experience of the program.  
7  
8  
9 489 These measures highlight how participants expressed gratitude regarding what they  
10  
11 490 learnt and spoke to how this might have improved their confidence in working with  
12  
13  
14 491 Indigenous patients going forward. These shifts in confidence, although surely positive,  
15  
16 492 cannot be interpreted as evidence of improved quality of care towards Indigenous patients  
17  
18  
19 493 in the health care system.  
20  
21

22 494  
23  
24 495 **Very little evidence of patient focused impacts and no measures of systems-level impact**

25  
26  
27 496 Cultural safety by definition can only be determined and evaluated by the person receiving  
28  
29  
30 497 the care and their family,(50) yet only three of thirteen studies included tools designed to  
31  
32 498 evaluate patient experience: a subset of patient interviews post intervention(44) and  
33  
34  
35 499 pre/post file audits.(40,45) Interestingly, Liaw and colleagues saw no impact, and  
36  
37  
38 500 concluded, that “the lack of effect of the intervention may be attributable to study design  
39  
40 501 limitations, complex and indirect relationship between the intervention and the outcome  
41  
42  
43 502 measures, or contextual factors that influenced the fidelity of the intervention at the  
44  
45 503 Medicare Local/PHN level and its ability to achieve measurable changes in the target  
46  
47  
48 504 behaviours.”((45) p267) None of the studies attempted to measure adherence to clinical  
49  
50  
51 505 practice guidelines, which could be evaluated through standardized patients(53–55) or  
52  
53 506 audits of clinical care.(56,57) Kirkpatrick has argued that it is “difficult, if not impossible  
54  
55  
56 507 to evaluate the impact of training on an organization due to an inability to separate the  
57  
58  
59

1  
2  
3  
4 508 variables which could be attributed to other factors.” ((52) p59) In this study, we focused  
5  
6 509 on interventions implemented at the level of the health care provider, however, the  
7  
8  
9 510 approach does not limit the evaluation to individual level measures, as cultural safety  
10  
11 511 training of health care providers can have organizational-level impacts. None of the  
12  
13  
14 512 studies evaluated systems-level changes that may have been associated with individual  
15  
16 513 training. Understanding the networked effect of how training participants subsequently  
17  
18  
19 514 influence their colleagues will be important going forward. Hulko and colleagues(41)  
20  
21  
22 515 noted that cultural safety research in general needs to advance tools that will measure  
23  
24 516 these effects, and noted that organizational change will require institutional supports and  
25  
26  
27 517 policy changes that encourage health care professionals to implement culturally safe  
28  
29  
30 518 practices.

31  
32 519

### 33 34 35 520 **Impactful specific training approaches, strategies, formats or content**

36  
37 521 The application of purposeful, evidence based, pedagogical theory and practices that  
38  
39  
40 522 advance pre-requisite knowledge, self-awareness and skills is critical to the success of  
41  
42  
43 523 cultural safety training and education programs. A number of the reviewed studies  
44  
45 524 described how specific training approaches, formats or content may have contributed to  
46  
47  
48 525 impact, however, most of the authors were also careful to note the limitations of their  
49  
50  
51 526 outcomes and the need for further research to clarify whether and if so, how, approach  
52  
53 527 and content of the training program contributed to the outcomes. Some authors also  
54  
55  
56 528 described how variation between past and current evaluations of Indigenous cultural

1  
2  
3  
4 529 safety, including conceptual frameworks, measurement tools and aims, resulted in an  
5  
6 530 overall lack of consensus and limited the development of an evidence-base.(35,42)  
7  
8  
9 531 Hinton et al(40) spoke to the value of a participatory action-oriented study design that  
10  
11 532 incorporated institutional leadership as change agents and clinical champions to  
12  
13  
14 533 encourage recruitment and uptake. This was further supported by Brewer et al.(35) who  
15  
16 534 observed low uptake and argued that incentives, particularly over the longer term, were  
17  
18  
19 535 not always effective and that to improve uptake, and consequently evaluation, training  
20  
21  
22 536 ought to be “compulsory or obligatory” and recommended organizational commitment and  
23  
24 537 team involvement. Implementing mandated training alongside appropriate evaluations  
25  
26  
27 538 using file audits, simulation and/or standardized patients will undoubtedly require training  
28  
29  
30 539 and evaluation protocols that address arising concerns of participant health care  
31  
32 540 professionals.

33  
34  
35 541  
36  
37 542 The evidence was limited as to whether or not inclusion of Indigenous people and  
38  
39  
40 543 communities contributed to successful outcomes, although a number of the studies  
41  
42  
43 544 referenced various components, such as Indigenous vodcasts, guest speakers, cultural  
44  
45 545 mentors, and academic lecturers as key to the programs they evaluated. Liaw and  
46  
47  
48 546 colleagues concluded that the strength of their program may have been resultant from  
49  
50  
51 547 the inclusion of cultural mentors who, when “working with practice staff in their own  
52  
53 548 environment, were effective translators of cultural respect theory and knowledge, as  
54  
55  
56 549 formalized in the toolkit and delivered by the workshop, into practice.”((44) p391) Hinton

1  
2  
3  
4 550 and colleagues(40) also made similar observations regarding cultural advisors, who were  
5  
6 551 involved in the action oriented programming and group sessions.  
7  
8

9 552

## 10 11 553 **CONCLUDING REMARKS**

12  
13  
14 554 Overall, there is a paucity of evidence linking existing Indigenous cultural safety training  
15  
16 555 interventions to enhancements in non-Indigenous health care professionals' knowledge,  
17  
18 556 culturally safe engagement skills and clinical practice guideline adherence when caring  
19  
20 557 for Indigenous patients. As researchers and practitioners in this field, we note that these  
21  
22 558 gaps in rigorous patient-outcome focused scholarship are rooted in systemic limitations  
23  
24 559 in the resources available to organizations leading this work to carry-out and disseminate  
25  
26 560 comprehensive and cost-intensive evaluations. This systemic under-resourcing and the  
27  
28 561 linked implementation of non-evidence based interventions is problematic, inconsistent  
29  
30 562 with the evidence standards required in other domains of clinical training, and is  
31  
32 563 commonly associated with the same harmful anti-Indigenous, colonial policies and  
33  
34 564 practices that training is designed to disrupt. Further research investment, with funds  
35  
36 565 directed towards Indigenous-led agencies and organizations that are leading the work in  
37  
38 566 this field, is required to advance training program evaluation design, implementation,  
39  
40 567 analysis and dissemination to ensure that both the training programs and their evaluations  
41  
42 568 meets the dual criteria of excellence in Indigenous health research: a) methodological  
43  
44  
45  
46  
47  
48  
49  
50  
51  
52  
53  
54  
55  
56  
57  
58  
59  
60

1  
2  
3  
4 569 rigour and b) alignment with and connection to local, regional and /or national Indigenous  
5  
6 570 priorities and needs.  
7

8  
9 571

10  
11 572 **REFERENCE LIST**  
12

13  
14 573 1. Commission on Social Determinants of Health (CSDH). Social Determinants and  
15  
16 574 Indigenous Health: The International Experience and Its Policy Implications.  
17

18  
19 575 Adelaide: International Symposium on the Social Determinants of Indigenous  
20

21  
22 576 Health. 2007 Apr [cited 2023 Jan 6]. 40 p. Available from:  
23

24  
25 577 <https://nativehealthdatabase.net/node/17216>  
26

27  
28 578 2. Stephanovich O. Pope Francis apologizes to Indigenous delegates for “deplorable”  
29  
30 579 abuses at residential schools. CBC News [Internet]. 2022 Apr 1 [cited 2023 Jan 6].  
31

32  
33 580 Available from: <https://www.cbc.ca/news/politics/pope-francis-responds-indigenous->  
34

35  
36 581 [delegations-final-meeting-1.6404344](https://www.cbc.ca/news/politics/pope-francis-responds-indigenous-delegations-final-meeting-1.6404344)  
37

38  
39 582 3. Yardely J, Neuman W. In Bolivia, Pope Francis Apologizes for Church’s ‘Grave  
40

41  
42 583 Sins’. New York Times [Internet]. 2015 Jul 9 [cited 2023 Jan 6]. Available from:  
43

44  
45 584 <https://www.nytimes.com/2015/07/10/world/americas/pope-francis-bolivia-catholic->  
46

47  
48 585 [church-apology.html](https://www.nytimes.com/2015/07/10/world/americas/pope-francis-bolivia-catholic-church-apology.html)  
49

50  
51 586 4. Parliament of Australia. Prime Minister Kevin Rudd, MP—Apology to Australia’s  
52

53  
54 587 indigenous peoples [television broadcast]. 2008.  
55

- 1  
2  
3  
4 588 5. Spencer G. Queen Signs Historic Maori Land Settlement. AP News. 1995 Nov 2  
5  
6 589 [cited 2023 Jan 6]. Available from:  
7  
8  
9 590 <https://apnews.com/article/808c85d946ad2a26c29813a2403e808e>  
10  
11  
12 591 6. Jackson M. In the end “The hope of decolonization”. In: McKinley E, Tuhiwai Smith  
13  
14  
15 592 L, editors. Handbook of Indigenous education. Singapore: Springer; 2019. P. 101-  
16  
17 593 10.  
18  
19  
20  
21 594 7. Wolfe P. Settler colonialism and the elimination of the native. J Genocide Res. 2006  
22  
23  
24 595 Dec; 8(4): 387–409.  
25  
26  
27 596 8. Reid P, Cormack D, Paine SJ. Colonial histories, racism and health—The  
28  
29  
30 597 experience of Māori and Indigenous peoples. Public Health. 2019 Jul; 172: 119–24.  
31  
32  
33  
34 598 9. Zuberi T. Thicker than blood. How Racial Statistics Lie. Minnesota (USA): University  
35  
36 599 of Minnesota Press; 2013.  
37  
38  
39  
40 600 10. National Collaborating Centre for Indigenous Health. Reading C. Social  
41  
42 601 Determinants of Health: Understanding Racism. [Internet] Vancouver (CA): NCCIH;  
43  
44  
45 602 2020 [updated 2020 Sep 08; cited 2023 Jan 6]. Available from:  
46  
47 603 [https://www.nccih.ca/495/Understanding\\_racism.nccih?id=103](https://www.nccih.ca/495/Understanding_racism.nccih?id=103).  
48  
49  
50  
51 604 11. Paine S, Cormack D, Reid P, Harris R, Robson B. Kaupapa Māori-informed  
52  
53  
54 605 approaches to support data rights and self-determination. In: Walter M, Kukutai T,  
55  
56  
57  
58  
59  
60

- 1  
2  
3  
4 606 Carroll S, Rodriguez-Lonebear D, editors. Indigenous Data Sovereignty and Policy.  
5  
6 607 Oxfordshire (GB): Routledge; 2020. P. 187-203  
7  
8  
9  
10 608 12. Youé C. Settler colonialism or colonies with settlers? Can J Afr Stud Rev Can  
11  
12 609 Études Afr. 2018; 52(1): 69–85.  
13  
14  
15  
16 610 13. Nerestant A. Racism, prejudice contributed to Joyce Echaquan’s death in hospital,  
17  
18 611 Quebec coroner’s inquiry concludes. CBC News [Internet]. 2021 Oct 01 [cited 2023  
19  
20 612 Jan 6]. Available from: [https://www.cbc.ca/news/canada/montreal/joyce-echaquan-](https://www.cbc.ca/news/canada/montreal/joyce-echaquan-systemic-racism-quebec-government-1.6196038)  
21  
22 613 [systemic-racism-quebec-government-1.6196038](https://www.cbc.ca/news/canada/montreal/joyce-echaquan-systemic-racism-quebec-government-1.6196038)  
23  
24  
25  
26  
27 614 14. CBC News. Atikamekw community “shocked” by François Legault comments on  
28  
29 615 Joyce Echaquan’s death. CBC News [Internet]. 2022 Sep 17 [cited 2023 Jan 6].  
30  
31 616 Available from: [https://www.cbc.ca/news/canada/montreal/atikamekw-shocked-](https://www.cbc.ca/news/canada/montreal/atikamekw-shocked-legault-joyce-echaquan-comment-1.6586853)  
32  
33 617 [legault-joyce-echaquan-comment-1.6586853](https://www.cbc.ca/news/canada/montreal/atikamekw-shocked-legault-joyce-echaquan-comment-1.6586853)  
34  
35  
36  
37  
38  
39 618 15. Hall WJ, Chapman MV, Lee KM, Merino YM, Thomas TW, Payne BK, et al. Implicit  
40  
41 619 Racial/Ethnic Bias Among Health Care Professionals and Its Influence on Health  
42  
43 620 Care Outcomes: A Systematic Review. Am J Public Health. 2015 Dec; 105(12):  
44  
45 621 e60–76.  
46  
47  
48  
49  
50 622 16. FitzGerald C, Hurst S. Implicit bias in healthcare professionals: a systematic review.  
51  
52 623 BMC Med Ethics. 2017 Mar; 18(1): 19.  
53  
54  
55  
56  
57  
58  
59  
60



- 1  
2  
3  
4 624 17. Green AR, Carney DR, Pallin DJ, Ngo LH, Raymond KL, Iezzoni LI, et al. Implicit  
5  
6 625 Bias among Physicians and its Prediction of Thrombolysis Decisions for Black and  
7  
8  
9 626 White Patients. *J Gen Intern Med.* 2007 Sep; 22(9): 1231–8.
- 10  
11  
12 627 18. The Truth Reconciliation Commission of Canada. Honouring the Truth, Reconciling  
13  
14  
15 628 for the future: summary of the final report of the Truth and Reconciliation  
16  
17 629 Commission of Canada. 2015
- 18  
19  
20  
21 630 19. Churchill M, Parent-Bergeron M, Smylie J, Fridkin A, Smylie D, Firestone M.  
22  
23  
24 631 Evidence Brief: Wise Practices for Indigenous-specific Cultural Safety Training  
25  
26 632 Programs [Internet]. Toronto: Well Living House Action Research Centre for  
27  
28  
29 633 Indigenous Infant, Child, and Family Health and Wellbeing; 2017 Aug [cited 2022  
30  
31 634 Jan 06]. 21 p. Available from: [http://www.welllivinghouse.com/wp-](http://www.welllivinghouse.com/wp-content/uploads/2019/05/2017-Wise-Practices-in-Indigenous-Specific-Cultural-Safety-Training-Programs.pdf)  
32  
33  
34 635 [content/uploads/2019/05/2017-Wise-Practices-in-Indigenous-Specific-Cultural-](http://www.welllivinghouse.com/wp-content/uploads/2019/05/2017-Wise-Practices-in-Indigenous-Specific-Cultural-Safety-Training-Programs.pdf)  
35  
36 636 [Safety-Training-Programs.pdf](http://www.welllivinghouse.com/wp-content/uploads/2019/05/2017-Wise-Practices-in-Indigenous-Specific-Cultural-Safety-Training-Programs.pdf)
- 37  
38  
39  
40 637 20. Page MJ, McKenzie JE, Bossuyt PM, Boutron I, Hoffmann TC, Mulrow CD, et al.  
41  
42  
43 638 The PRISMA 2020 statement: an updated guideline for reporting systematic  
44  
45 639 reviews. *BMJ (Online).* 2021 Mar; 372: n71.
- 46  
47  
48  
49 640 21. Lefebvre C, Glanville J, Briscoe S, Littlewood A, Marshall C, Metzendorf M, et al.  
50  
51  
52 641 Searching for and selecting studies. In: *Cochrane Handbook for Systematic Reviews*  
53  
54 642 *of Interventions.* Chichester, UK: John Wiley & Sons, Ltd; 2019. p. 67–107
- 55  
56  
57  
58  
59  
60

- 1  
2  
3  
4 643 22. Harrison H, Griffin SJ, Kuhn I, Usher-Smith JA. Software tools to support title and  
5  
6 644 abstract screening for systematic reviews in healthcare: an evaluation. BMC Med  
7  
8  
9 645 Res Methodol. 2020 Jan; 20(1): 7.
- 10  
11  
12 646 23. Maddox R, Blais G, Mashford-Pringle A, Monchalin R, Firestone M, Ziegler C, et al.  
13  
14  
15 647 Reviewing Health Service and Program Evaluations in Indigenous Contexts: A  
16  
17 648 Systematic Review. Am J Eval. 2021; 42(3): 332–53.
- 19  
20  
21 649 24. Morton Ninomiya ME, Atkinson D, Brascoupé S, Firestone M, Robinson N, Reading  
22  
23  
24 650 J, et al. Effective knowledge translation approaches and practices in Indigenous  
25  
26 651 health research: a systematic review protocol. Syst Rev. 2017 Feb; 6(1): 34.
- 27  
28  
29  
30 652 25. Smylie J, Kirst M, McShane K, Firestone M, Wolfe S, O'Campo P. Understanding  
31  
32  
33 653 the role of Indigenous community participation in Indigenous prenatal and infant-  
34  
35 654 toddler health promotion programs in Canada: A realist review. Soc Sci Med. 2016  
36  
37  
38 655 Feb; 150: 128–43.
- 39  
40  
41 656 26. Popay J, Roberts H, Sowden A, Petticrew M, Arai L, Rodgers M, et al. Guidance on  
42  
43  
44 657 the conduct of narrative synthesis in systematic reviews. A product from the ESRC  
45  
46  
47 658 methods programme Version. 2006 Apr; 1(1): b92.
- 48  
49  
50 659 27. Smylie J, Kaplan-Myrth N, McShane K, Métis Nation of Ontario-Ottawa Council  
51  
52  
53 660 Pikwakanagan First Nation Tungasuvvingat Inuit Family Resource Centre.  
54  
55  
56 661 Indigenous knowledge translation: baseline findings in a qualitative study of the  
57  
58  
59  
60

- 1  
2  
3  
4 662 pathways of health knowledge in three indigenous communities in Canada. *Health*  
5  
6 663 *Promot Pract.* 2009 Jul; 10(3): 436–46.  
7  
8  
9  
10 664 28. Smylie J. Knowledge translation and Indigenous knowledge. A decolonizing  
11  
12 665 perspective. In: Banister EM, Leadbeater BJ, Marshall A, editors. *Knowledge*  
13  
14 666 *Translation in community-based research and social policy contexts.* Toronto:  
15  
16 667 University of Toronto Press; 2011. p. 181–208.  
17  
18  
19  
20  
21 668 29. Smylie J, Olding M, Ziegler C. Sharing What We Know about Living a Good Life:  
22  
23 669 Indigenous Approaches to Knowledge Translation. *J Can Health Libr Assoc.* 2014;  
24  
25 670 35: 16–23.  
26  
27  
28  
29  
30 671 30. Allan B, Smylie J. All our relations: Indigenous Women’s Health in Canada. In:  
31  
32 672 Varcoe C, Hankivsky O, Morrow MH, editors. *Women’s health in Canada:*  
33  
34 673 *challenges of intersectionality.* Toronto, CA: University of Toronto Press; 2022.  
35  
36 674 p.116-117  
37  
38  
39  
40  
41 675 31. Kirkness VJ and Barnhardt R. First Nations and higher education: the four R’s -  
42  
43 676 respect, relevance, reciprocity, responsibility. *Journal of American Education.* 1991;  
44  
45 677 30(3): 1-15.  
46  
47  
48  
49  
50 678 32. Restoule JP. The five r’s of Indigenous research: Relationship, respect, relevance,  
51  
52 679 responsibility, and reciprocity. Workshop presented at: *Wise Practices II: Canadian*  
53  
54  
55  
56  
57  
58  
59  
60

- 1  
2  
3  
4 680 Aboriginal AIDS Network Research and Capacity Building Conference; 2008 Nov  
5  
6 681 26; Toronto.  
7  
8  
9  
10 682 33. Barajas JJ. Cultural Sensitivity for Healthcare Provides on the Tohono O'Odham  
11  
12 683 Nation: a Quality Improvement Project [dissertation]. Ann Arbor (USA): ProQuest  
13  
14 684 Dissertations Publishing; 2021. 92 p.  
15  
16  
17  
18 685 34. Barnabe C, Kherani RB, Appleton T, Umaefulam V, Henderson R, Crowshoe L.  
19  
20  
21 686 Participant-reported effect of an Indigenous health continuing professional  
22  
23 687 development initiative for specialists. BMC Med Educ. 2021 Dec; 21(1): 116.  
24  
25  
26  
27 688 35. Brewer KM, McCann CM, Harwood MLN. Working with Māori adults with aphasia:  
28  
29  
30 689 an online professional development course for speech-language therapists.  
31  
32 690 Aphasiology. 2020 Nov; 34(11): 1413–31.  
33  
34  
35  
36 691 36. Chapman R, Martin C, Smith T. Evaluation of staff cultural awareness before and  
37  
38 692 after attending cultural awareness training in an Australian emergency department.  
39  
40 693 Int Emerg Nurs. 2014 Oct; 22(4): 179–84.  
41  
42  
43  
44  
45 694 37. Crowshoe L, Han H, Calam B, Henderson R, Jacklin K, Walker L, et al. Impacts of  
46  
47 695 Educating for Equity Workshop on Addressing Social Barriers of Type 2 Diabetes  
48  
49 696 With Indigenous Patients. J Contin Educ Health Prof. 2018 Dec; 38(1): 49–59.  
50  
51  
52  
53  
54  
55  
56  
57  
58  
59  
60

- 1  
2  
3  
4 697 38. Delbridge R, Wilson A, Palermo C. Measuring the impact of a community of practice  
5  
6 698 in Aboriginal health. *Stud Contin Educ.* 2018 Jan; 40(1): 62–75.  
7  
8  
9  
10 699 39. Durey A, Halkett G, Berg M, Lester L, Kickett M. Does one workshop on respecting  
11  
12 700 cultural differences increase health professionals' confidence to improve the care of  
13  
14 701 Australian Aboriginal patients with cancer? An evaluation. *BMC Health Serv Res.*  
15  
16 702 2017 Dec; 17(1): 660.  
17  
18  
19  
20  
21 703 40. Hinton R, Bradley P, Trauer T, Nagel T. Strengthening acute inpatient mental health  
22  
23 704 care for Indigenous clients. *Adv Ment Health.* 2014 Aug; 12(2): 125–35.  
24  
25  
26  
27 705 41. Hulko W, Mahara MS, Wilson D, Campbell-McArthur G. Culturally safe dementia  
28  
29 706 care: Building nursing capacity to care for First Nation Elders with memory loss. *Int J*  
30  
31 707 *Older People Nurs.* 2021 Sep; 16(5): e12395.  
32  
33  
34  
35  
36 708 42. Kerrigan V, Lewis N, Cass A, Hefler M, Ralph AP. "How can I do more?" Cultural  
37  
38 709 awareness training for hospital-based healthcare providers working with high  
39  
40 710 Aboriginal caseload. *BMC Med Educ.* 2020 Dec; 20(1): 173.  
41  
42  
43  
44  
45 711 43. Kerrigan V, McGrath SY, Herdman RM, Puruntatameri P, Lee B, Cass A, et al.  
46  
47 712 Evaluation of 'Ask the Specialist': a cultural education podcast to inspire improved  
48  
49 713 healthcare for Aboriginal peoples in Northern Australia. *Health Sociol Rev.* 2022  
50  
51 714 May; 31(2): 139–57.  
52  
53  
54  
55  
56  
57  
58  
59  
60

- 1  
2  
3  
4 715 44. Liaw ST, Hasan I, Wade V, Canalese R, Kelaher M, Lau P, et al. Improving cultural  
5  
6 716 respect to improve Aboriginal health in general practice: a multi-methods and multi-  
7  
8  
9 717 perspective pragmatic study. *Aust Fam Physician*. 2015 Jun; 44(6): 387-92.  
10  
11  
12 718 45. Liaw S, Wade V, Furler JS, Hasan I, Lau P, Kelaher M, et al. Cultural respect in  
13  
14  
15 719 general practice: a cluster randomised controlled trial. *Med J Aust*. 2019 Apr; 210(6):  
16  
17 720 263–8.  
18  
19  
20  
21 721 46. McMichael B, Nickel A, Duffy EA, Skjefte L, Lee L, Park P, et al. The Impact of  
22  
23  
24 722 Health Equity Coaching on Patient's Perceptions of Cultural Competency and  
25  
26 723 Communication in a Pediatric Emergency Department: An Intervention Design. *J*  
27  
28  
29 724 *Patient Exp*. 2019 Dec; 6(4): 257–64.  
30  
31  
32  
33 725 47. Sauv e A, Cappelletti A, Murji L. Stand Up for Indigenous Health: A Simulation to  
34  
35 726 Educate Residents About the Social Determinants of Health Faced by Indigenous  
36  
37  
38 727 Peoples in Canada. *Acad Med*. 2022 Apr; 97(4): 518–23.  
39  
40  
41  
42 728 48. Wheeler AJ, Hu J, Tadakamadla SK, Hall K, Miller A, Kelly F. Development and  
43  
44 729 feasibility testing of a training programme for community pharmacists to deliver a  
45  
46  
47 730 culturally responsive medication review intervention. *Pilot Feasibility Stud*. 2022  
48  
49 731 Dec; 8(1): 51.  
50  
51  
52  
53 732 49. Curtis E, Jones R, Tipene-Leach D, Walker C, Loring B, Paine SJ, et al. Why  
54  
55 733 cultural safety rather than cultural competency is required to achieve health equity: a

1  
2  
3  
4 734 literature review and recommended definition. *Int J Equity Health*. 2019 Nov; 18(1):

5  
6 735 174.

7  
8  
9  
10 736 50. Ramsden IM. Cultural safety and nursing education in Aotearoa and Te

11  
12 737 Waipounamu [dissertation]. Wellington (NZ): Victoria University of Wellington; 2002.

13  
14  
15 738 211 p.

16  
17  
18 739 51. Smylie J, Harris R, Paine SJ, Velásquez IA, Nimatuj, Lovett R. Beyond shame,

19  
20  
21 740 sorrow, and apologies—action to address indigenous health inequities. *BMJ*

22  
23  
24 741 (Online). 2022 Jul; 378: o1688.

25  
26  
27 742 52. Kirkpatrick D. Great ideas revisited: Techniques for evaluating training programs.

28  
29  
30 743 *Train Dev*. 1996; 50(1): 54.

31  
32  
33 744 53. Badger LW, deGruy F, Hartman J, Plant MA, Leeper J, Ficken R, et al. Stability of

34  
35  
36 745 standardized patients' performance in a study of clinical decision making. *Fam Med*.

37  
38  
39 746 1995 Feb; 27(2): 126–31.

40  
41  
42 747 54. Colliver JA, Vu NV, Marcy ML, Travis TA, Robbs RS. Effects of examinee gender,

43  
44  
45 748 standardized-patient gender, and their interaction on standardized patients' ratings

46  
47  
48 749 of examinees' interpersonal and communication skills. *Acad Med*. 1993; 68: 153–7.

49  
50  
51 750 55. Rethans JJ, Boven CP van. Simulated patients in general practice: a different look at

52  
53  
54 751 the consultation. *Br Med J Clin Res Ed*. 1987 Mar; 294(6575): 809–12.

- 1  
2  
3  
4 752  
5  
6  
7 753 56. Abad-Arranz M, Moran-Rodríguez A, Mascarós Balaguer E, Quintana Velasco C,  
8  
9  
10 754 Abad Polo L, Núñez Palomo S, et al. Community Assessment of COPD Health Care  
11  
12 755 (COACH) study: a clinical audit on primary care performance variability in COPD  
13  
14  
15 756 care. BMC Med Res Methodol. 2018; 18(1): 68–68.  
16  
17  
18 757 57. Crabtree A, Sundararaj JJ, Pease N. Clinical audit?—invaluable! BMJ Support  
19  
20  
21 758 Palliat Care. 2020 Jun; 10(2): 213–5.  
22  
23  
24  
25 759

## 760 LIST OF ABBREVIATIONS

761 Well Living House Quality Appraisal Tool (WLHQAT)

## 763 AUTHORS' CONTRIBUTIONS

764 JS and DS conceptualized the systematic review. JS made significant contributions to the  
765 interpretation of the data. CZ carried out the database literature searches. SF and BJH  
766 screened titles and carried out data extraction. BJH and JS carried out the initial analysis  
767 and interpretation of the data and together, generated consensus with SF regarding key  
768 themes. DS commented on high level key themes. BJH, SF and JS drafted sections of  
769 the manuscript and DS commented on the manuscript in progress. All authors contributed  
770 to study design and interpretation of findings, and approved the final manuscript.



771

772 **COMPETING INTERESTS**

773 All authors have completed the ICMJE uniform disclosure form at  
774 [www.icmje.org/disclosure-of-interest/](http://www.icmje.org/disclosure-of-interest/). BJH, SF and CZ declare no competing interests. JS  
775 has no significant competing interests. JS is a sibling of DS. JS and DS are both members  
776 of the Indigenous Cultural Safety Learning Series Advisory Circle in Canada, funded by  
777 San'yas and co-hosted by the Ontario Federation of Indigenous Friendship Centres. The  
778 Indigenous Cultural Safety Learning Series is a webinar series focused on Indigenous  
779 cultural safety. It is guided by an Advisory Circle of Indigenous leaders from across  
780 Canada. DS was employed by the Southwest Ontario Aboriginal Health Access Centre  
781 (SOAHAC) (one of the funding agencies), in the early stages of this review until March  
782 2020. DS is currently employed by San'yas Indigenous Cultural Safety Learning  
783 Programs, Indigenous Health, Provincial Health Services Authority as of September  
784 2020. They offer educational interventions and consultation services designed to uproot  
785 anti-Indigenous racism and promote cultural safety for Indigenous people. One of the  
786 interventions studied included an early version of one of the online training programs  
787 offered by San'yas. It was referred to as Indigenous Cultural Competency (ICC) and was  
788 applied as part of a larger intervention in one of the articles included in the systematic  
789 review. This version was delivered prior to DS' employment with San'yas. The program  
790 is situated within a Provincial Health Services Authority (PHSA) in British Columbia,

1  
2  
3  
4 791 Canada and operated on a non-profit, cost recovery model through fees charged for the  
5  
6 792 training and with oversight by PHSA Indigenous Health Leadership. All of DS'  
7  
8  
9 793 compensation is subject to PHSA policies and DS is not permitted to receive any  
10  
11 794 compensation or payments outside of salary and benefits. DS' contributions were limited  
12  
13  
14 795 to the conceptual design of the study as well as high level commentary and feedback on  
15  
16 796 high level thematic analyses and draft manuscripts. DS was blinded to the mention of ICC  
17  
18  
19 797 (now San'yas) training materials in any discussions related to higher level thematic  
20  
21  
22 798 analysis.

23  
24  
25 799

## 26 27 800 **FUNDING**

28  
29  
30 801 Dr. Smylie is funded by a Tier 1 Canada Research Chair. This project was also supported  
31  
32  
33 802 by funding from the Southwest Ontario Aboriginal Health Access Centre (SOAHAC) and  
34  
35 803 the St. Michael's Hospital Foundation.

36  
37  
38 804

## 39 40 41 805 **DATA SHARING**

42  
43  
44 806 Most of the data generated or analysed as well as the WLHQAT applied during this study  
45  
46 807 are publicly available. Additional materials, such as the study protocol and WLHQAT data  
47  
48  
49 808 analyses are available upon request from the corresponding author.

50  
51  
52 809

## 53 54 810 **PATIENT AND PUBLIC INVOLVEMENT**

1  
2  
3  
4 811 We did not involve patients or the public in the design, or conduct, or reporting, or  
5  
6 812 dissemination plans of our research.  
7

8  
9 813

## 10 11 814 **ETHICS APPROVAL AND CONSENT TO PARTICIPATE**

12  
13  
14 815 Ethics approval and consent to participate were not required for this study.  
15  
16

17 816

## 18 19 817 **ACKNOWLEDGEMENTS**

20  
21  
22 818 The authors would like to acknowledge Michèle Parent Bergeron and SOAHAC for their  
23  
24  
25 819 contributions to the study.  
26

27  
28 820

29  
30 821  
31  
32  
33  
34  
35  
36  
37  
38  
39  
40  
41  
42  
43  
44  
45  
46  
47  
48  
49  
50  
51  
52  
53  
54  
55  
56  
57  
58  
59  
60

1  
2  
3  
4  
5  
6  
7  
8  
9  
10  
11  
12  
13  
14  
15  
16  
17  
18  
19  
20  
21  
22  
23  
24  
25  
26  
27  
28  
29  
30  
31  
32  
33  
34  
35  
36  
37  
38  
39  
40  
41  
42  
43  
44  
45  
46  
47  
48  
49  
50  
51  
52  
53  
54  
55  
56

Identification

Records identified through databases [n = 3,567]

Records identified through other sources [n = 3]

Records after duplicates removed [n = 2,442]

Screening

Titles and abstracts screened for inclusion [n = 2,442]

Records removed for ineligibility [n = 2,250]

Eligibility

Full texts assessed for eligibility [n = 192]

Full texts excluded based on:  
○ Primary inclusion criteria (1-3) and secondary inclusion criteria (i) [n=147]  
○ Secondary inclusion criteria (ii) [n=29]

Appraisal

Full texts appraised using the WLHQAT [n = 16]

Full texts excluded for scores <7 [n = 3]

Inclusion

Articles included in the final synthesis [n = 13]

## Supplementary Figure 2

### Search Strategies:

Below are the full search strategies exactly as run on the fourth search update on May 12, 2022. Three previous searches were carried out using these strategies on September 18, 2018; July 30, 201; and March 9, 2021. The first search on September 18, 2018 was limited to articles published from 2006 and on.

### Ovid MEDLINE: Epub Ahead of Print, In-Process & Other Non-Indexed Citations, Ovid MEDLINE® Daily and Ovid MEDLINE® <1946-Present>

1 american native continental ancestry group/ or exp indians, north american/ or inuits/ or  
 2 exp Indigenous Peoples/ 19761  
 3 Oceanic Ancestry Group/ 11661  
 4 United States Indian Health Service/ 596  
 5 Health Services, Indigenous/ 3819  
 6 (Aborigin\* or Indigenous or Eskimo\* or Inuit\* or Inuk\* or Metis or First Nations or First  
 7 Nation or 1st nation or 1st nations or Native Canadian\* or Native American\* or Maori\* or Pacific  
 8 Islander\* or American Indian\* or Amerindian\* or Native Alaska\* or Alaska Native\* or Native  
 9 Hawaiian\* or Torres Strait Islander\* or on-reserve or off-reserve or tribal or autochtone\* or  
 10 amerindien\* or indigene\*).mp. 79690  
 11 (indian or indians).ti,ab,kw. 82911  
 12 India/ 115065  
 13 6 not 7 55466  
 14 1 or 2 or 3 or 4 or 5 or 8 128874  
 15 Cultural Competency/ 6278  
 16 Culturally Competent Care/ 2028  
 17 Transcultural Nursing/3442  
 18 cultural diversity/ 12558  
 19 cultural\* competenc\*.tw,kf. 4480  
 20 cultural\* safe\*.tw,kf. 941  
 21 cultural awareness.tw,kf. 717  
 22 cultural\* sensitiv\*.tw,kf. 5526  
 23 cultural\* secur\*.tw,kf.54  
 24 cultural humility.tw,kf. 407  
 25 cross-cultural.tw,kf. 15212  
 26 cultural\* respect\*.tw,kf. 115  
 27 anti-racis\*.tw,kf. 349

1  
2  
3 23 antiracis\*.tw,kf. 312  
4 24 postcolonial\*.tw,kf. 426  
5 25 colonial\*.tw,kf. 7112  
6  
7 26 or/10-25 50752  
8  
9 27 exp Health Personnel/581961  
10 28 "Attitude of Health Personnel"/ 129471  
11 29 "Internship and Residency"/ 57027  
12  
13 30 ((health\* or medical or nurs\* or hospital) adj2 (personnel or provider\* or professional\*  
14 or worker\* or staff or specialist\* or employee\*)).tw,kf. 363535  
15  
16 31 (doctor\* or physician\* or practitioner\* or nurse\* or clinician\* or hospitalist\* or dentist\*  
17 or therapist\* or physiotherapist\* or occupational therapist\* or psychologist\* or psychiatrist\* or  
18 counsel?or\* or social worker\* or midwi\* or paramedic\* or emergency medical technician\* or  
19 pharmacist\* or dietician\* or medic\* resident\*).tw,kf. 1374101  
20  
21 32 or/27-31 1933424  
22  
23 33 Education/ 21493  
24 34 curriculum/ 83087  
25  
26 35 competency-based education/ 4429  
27 36 exp education, professional/ 321367  
28 37 exp Inservice Training/ 29907  
29 38 exp Teaching/ 91371  
30 39 exp Teaching Materials/ 123098  
31 40 exp Health Personnel/ed [Education] 63884  
32 41 cultural competency/ed 961  
33 42 Transcultural Nursing/ed [Education] 864  
34 43 exp Culture/ed [Education] 1033  
35 44 (training or education\* or learn\* or teach\* or workshop\* or curricul\* or pedagog\* or  
36 seminar\*).tw,kf. 1604662  
37 45 (professional development or staff development).tw,kf. 13772  
38 46 or/33-45 1870696  
39  
40 47 9 and 26 and 32 and 46 945  
41 48 limit 47 to english language 934  
42 49 limit 48 to ed=20210308-20220512 123  
43 50 limit 48 to dt=20210308-20220512 111  
44 51 limit 48 to ez=20210308-20220512 111  
45 52 limit 48 to yr="2022 -Current" 50  
46 53 49 or 50 or 51 or 52 157  
47 54 remove duplicates from 53 155  
48  
49  
50  
51  
52  
53  
54  
55  
56  
57  
58  
59  
60

## Embase Classic+Embase &lt;1947 to 2022 May 11&gt;

1 indigenous people/ or alaska native/ or american indian/ or canadian aboriginal/ or first  
 2 nation/ or indigenous australian/ 32329  
 3  
 4  
 5  
 6 1 exp amerind people/ or exp australian aborigine/ or exp eskimo-aleut people/ or exp na-  
 7 dene people/ 7622  
 8  
 9 2 "maori (people)"/ or native hawaiian/ 2383  
 10  
 11 3 exp oceanic ancestry group/ 9022  
 12  
 13 4 indigenous health care/ 1176  
 14  
 15 5 (Aborigin\* or Indigenous or Eskimo\* or Inuit\* or Inuk\* or Metis or First Nations or First  
 16 Nation or 1st nation or 1st nations or Native Canadian\* or Native American\* or Maori\* or Pacific  
 17 Islander\* or American Indian\* or Amerindian\* or Native Alaska\* or Alaska Native\* or Native  
 18 Hawaiian\* or Torres Strait Islander\* or on-reserve or off-reserve or tribal or autochtone\* or  
 19 amerindien\* or indigene\*).ti,ab,kw. 93751  
 20  
 21 6 (indian or indians).ti,ab,kw. 114804  
 22  
 23 7 exp indian/ 40575  
 24  
 25 8 India/ 167974  
 26  
 27 9 8 or 9 201479  
 28  
 29 10 7 not 10 58826  
 30  
 31 11 (or/1-6) or 11 153454  
 32  
 33 12 cultural competence/ 7387  
 34  
 35 13 transcultural care/ 4825  
 36  
 37 14 cultural sensitivity/ 1261  
 38  
 39 15 cultural diversity/ 2692  
 40  
 41 16 cultural\* competenc\*.tw. 4546  
 42  
 43 17 cultural\* safe\*.tw. 1038  
 44  
 45 18 cultural awareness.tw. 839  
 46  
 47 19 cultural\* sensitiv\*.tw. 6598  
 48  
 49 20 cultural\* secur\*.tw. 71  
 50  
 51 21 cultural humility.tw. 426  
 52  
 53 22 cross-cultural.tw. 15606  
 54  
 55 23 cultural\* respect\*.tw. 137  
 56  
 57 24 anti-racis\*.tw. 310  
 58  
 59 25 antiracis\*.tw. 294  
 60  
 61 26 postcolonial\*.tw. 375  
 62  
 63 27 colonial\*.tw. 7139  
 64  
 65 28 or/13-28 45229  
 66  
 67 29 exp health care personnel/ 1856636  
 68  
 69  
 70

1  
2  
3 31 health personnel attitude/ 88298  
4 32 ((health\* or medical or nurs\* or hospital) adj2 (personnel or provider\* or professional\*  
5 or worker\* or staff or specialist\* or employee\*)).tw.478961  
6  
7 33 (doctor\* or physician\* or practitioner\* or nurse\* or clinician\* or hospitalist\* or dentist\*  
8 or therapist\* or physiotherapist\* or occupational therapist\* or psychologist\* or psychiatrist\* or  
9 counsel?or\* or social worker\* or midwi\* or paramedic\* or emergency medical technician\* or  
10 pharmacist\* or dietician\* or medic\* resident\*).tw. 1881277  
11  
12 34 30 or 31 or 32 or 33 3109487  
13  
14 35 education/ or continuing education/ or course content/ or curriculum/ or curriculum  
15 development/ or education program/ or "outcome of education"/ 615015  
16  
17 36 in service training/ 16717  
18  
19 37 teaching/ 108269  
20  
21 38 (training or education\* or learn\* or teach\* or workshop\* or curricul\* or pedagog\* or  
22 seminar\*).tw. 2082644  
23  
24 39 (professional development or staff development).tw. 15840  
25  
26 40 35 or 36 or 37 or 38 or 39 2297974  
27  
28 41 12 and 29 and 34 and 40 930  
29  
30 42 limit 41 to embase 254  
31  
32 43 limit 42 to english language 253  
33  
34 44 limit 43 to dc=20210308-20220512 42

#### EBM Reviews - Cochrane Central Register of Controlled Trials <April 2022>

#### EBM Reviews - Cochrane Database of Systematic Reviews <2005 to May 11, 2022>

38 1 american native continental ancestry group/ or exp indians, north american/ or inuits/ or  
39 exp Indigenous Peoples/ 327  
40  
41 2 Oceanic Ancestry Group/ 7  
42  
43 3 United States Indian Health Service/ 4  
44  
45 4 Health Services, Indigenous/ 47  
46  
47 5 (Aborigin\* or Indigenous or Eskimo\* or Inuit\* or Inuk\* or Metis or First Nations or First  
48 Nation or 1st nation or 1st nations or Native Canadian\* or Native American\* or Maori\* or Pacific  
49 Islander\* or American Indian\* or Amerindian\* or Native Alaska\* or Alaska Native\* or Native  
50 Hawaiian\* or Torres Strait Islander\* or on-reserve or off-reserve or tribal or autochtone\* or  
51 amerindien\* or indigene\*).mp. 3033  
52  
53 6 (indian or indians).ti,ab,kw. 5091  
54  
55 7 India/ 2437  
56  
57 8 6 not 7 4449  
58  
59  
60



|    |    |                                                                                                                                                                                                                                                                                                                                               |        |
|----|----|-----------------------------------------------------------------------------------------------------------------------------------------------------------------------------------------------------------------------------------------------------------------------------------------------------------------------------------------------|--------|
| 1  |    |                                                                                                                                                                                                                                                                                                                                               |        |
| 2  |    |                                                                                                                                                                                                                                                                                                                                               |        |
| 3  | 9  | 1 or 2 or 3 or 4 or 5 or 8                                                                                                                                                                                                                                                                                                                    | 6754   |
| 4  |    |                                                                                                                                                                                                                                                                                                                                               |        |
| 5  | 10 | Cultural Competency/                                                                                                                                                                                                                                                                                                                          | 190    |
| 6  | 11 | Culturally Competent Care/                                                                                                                                                                                                                                                                                                                    | 110    |
| 7  |    |                                                                                                                                                                                                                                                                                                                                               |        |
| 8  | 12 | Transcultural Nursing/                                                                                                                                                                                                                                                                                                                        | 14     |
| 9  | 13 | cultural diversity/                                                                                                                                                                                                                                                                                                                           | 79     |
| 10 | 14 | cultural* competenc*.tw,kf.                                                                                                                                                                                                                                                                                                                   | 100    |
| 11 |    |                                                                                                                                                                                                                                                                                                                                               |        |
| 12 | 15 | cultural* safe*.tw,kf.                                                                                                                                                                                                                                                                                                                        | 35     |
| 13 | 16 | cultural awareness.tw,kf.                                                                                                                                                                                                                                                                                                                     | 13     |
| 14 | 17 | cultural* sensitiv*.tw,kf.                                                                                                                                                                                                                                                                                                                    | 589    |
| 15 |    |                                                                                                                                                                                                                                                                                                                                               |        |
| 16 | 18 | cultural* secur*.tw,kf.                                                                                                                                                                                                                                                                                                                       | 8      |
| 17 | 19 | cultural humility.tw,kf.                                                                                                                                                                                                                                                                                                                      | 11     |
| 18 |    |                                                                                                                                                                                                                                                                                                                                               |        |
| 19 | 20 | cross-cultural.tw,kf.                                                                                                                                                                                                                                                                                                                         | 357    |
| 20 | 21 | cultural* respect*.tw,kf.                                                                                                                                                                                                                                                                                                                     | 8      |
| 21 |    |                                                                                                                                                                                                                                                                                                                                               |        |
| 22 | 22 | anti-racis*.tw,kf.                                                                                                                                                                                                                                                                                                                            | 9      |
| 23 | 23 | antiracis*.tw,kf.                                                                                                                                                                                                                                                                                                                             | 1      |
| 24 | 24 | postcolonial*.tw,kf.                                                                                                                                                                                                                                                                                                                          | 1      |
| 25 |    |                                                                                                                                                                                                                                                                                                                                               |        |
| 26 | 25 | colonial*.tw,kf.                                                                                                                                                                                                                                                                                                                              | 34     |
| 27 | 26 | or/10-25                                                                                                                                                                                                                                                                                                                                      | 1413   |
| 28 |    |                                                                                                                                                                                                                                                                                                                                               |        |
| 29 | 27 | exp Health Personnel/                                                                                                                                                                                                                                                                                                                         | 10279  |
| 30 | 28 | "Attitude of Health Personnel"/                                                                                                                                                                                                                                                                                                               | 2059   |
| 31 | 29 | "Internship and Residency"/                                                                                                                                                                                                                                                                                                                   | 1373   |
| 32 |    |                                                                                                                                                                                                                                                                                                                                               |        |
| 33 | 30 | ((health* or medical or nurs* or hospital) adj2 (personnel or provider* or professional* or worker* or staff or specialist* or employee*)).tw,kf.                                                                                                                                                                                             | 31086  |
| 34 |    |                                                                                                                                                                                                                                                                                                                                               |        |
| 35 | 31 | (doctor* or physician* or practitioner* or nurse* or clinician* or hospitalist* or dentist* or therapist* or physiotherapist* or occupational therapist* or psychologist* or psychiatrist* or counsel?or* or social worker* or midwi* or paramedic* or emergency medical technician* or pharmacist* or dietician* or medic* resident*).tw,kf. | 147680 |
| 36 |    |                                                                                                                                                                                                                                                                                                                                               |        |
| 37 |    |                                                                                                                                                                                                                                                                                                                                               |        |
| 38 |    |                                                                                                                                                                                                                                                                                                                                               |        |
| 39 |    |                                                                                                                                                                                                                                                                                                                                               |        |
| 40 |    |                                                                                                                                                                                                                                                                                                                                               |        |
| 41 | 32 | or/27-31                                                                                                                                                                                                                                                                                                                                      | 169128 |
| 42 |    |                                                                                                                                                                                                                                                                                                                                               |        |
| 43 | 33 | Education/                                                                                                                                                                                                                                                                                                                                    | 608    |
| 44 | 34 | curriculum/                                                                                                                                                                                                                                                                                                                                   | 1584   |
| 45 | 35 | competency-based education/                                                                                                                                                                                                                                                                                                                   | 89     |
| 46 |    |                                                                                                                                                                                                                                                                                                                                               |        |
| 47 | 36 | exp education, professional/                                                                                                                                                                                                                                                                                                                  | 5404   |
| 48 | 37 | exp Inservice Training/                                                                                                                                                                                                                                                                                                                       | 835    |
| 49 |    |                                                                                                                                                                                                                                                                                                                                               |        |
| 50 | 38 | exp Teaching/                                                                                                                                                                                                                                                                                                                                 | 4681   |
| 51 | 39 | exp Teaching Materials/                                                                                                                                                                                                                                                                                                                       | 4501   |
| 52 |    |                                                                                                                                                                                                                                                                                                                                               |        |
| 53 | 40 | exp Health Personnel/ed [Education]                                                                                                                                                                                                                                                                                                           | 16     |
| 54 | 41 | cultural competency/ed                                                                                                                                                                                                                                                                                                                        | 0      |
| 55 | 42 | Transcultural Nursing/ed [Education]                                                                                                                                                                                                                                                                                                          | 0      |
| 56 |    |                                                                                                                                                                                                                                                                                                                                               |        |
| 57 |    |                                                                                                                                                                                                                                                                                                                                               |        |
| 58 |    |                                                                                                                                                                                                                                                                                                                                               |        |
| 59 |    |                                                                                                                                                                                                                                                                                                                                               |        |
| 60 |    |                                                                                                                                                                                                                                                                                                                                               |        |

1  
2  
3 43 exp Culture/ed [Education] 1  
4 44 (training or education\* or learn\* or teach\* or workshop\* or curricul\* or pedagog\* or  
5 seminar\*).tw,kf. 196173  
6  
7 45 (professional development or staff development).tw,kf. 475  
8  
9 46 or/33-45 200177  
10  
11 47 9 and 26 and 32 and 46 47  
12 48 limit 47 to yr="2021 -Current" 6  
13 49 remove duplicates from 48 6  
14  
15

### APA PsycInfo <1806 to May Week 2 2022>

18  
19 1 exp indigenous populations/ 15198  
20 2 tribes/ 1259  
21 3 (Aborigin\* or Indigenous or Eskimo\* or Inuit\* or Inuk\* or Metis or First Nations or First  
22 Nation or 1st nation or 1st nations or Native Canadian\* or Native American\* or Maori\* or Pacific  
23 Islander\* or American Indian\* or Amerindian\* or Native Alaska\* or Alaska Native\* or Native  
24 Hawaiian\* or Torres Strait Islander\* or on-reserve or off-reserve or tribal or autochtone\* or  
25 amerindien\* or indigene\*).tw. 31755  
26  
27 4 ((indian or indians) not india).tw. 15700  
28  
29 5 1 or 2 or 3 or 442412  
30  
31 6 cultural sensitivity/ 7916  
32  
33 7 cultural\* competenc\*.tw. 5610  
34  
35 8 cultural\* safe\*.tw. 369  
36  
37 9 cultural awareness.tw. 1291  
38  
39 10 cultural\* sensitiv\*.tw. 6987  
40  
41 11 cultural\* secur\*.tw. 29  
42  
43 12 cultural humility.tw. 482  
44  
45 13 cross-cultural.tw. 37152  
46  
47 14 cultural\* respect\*.tw. 101  
48  
49 15 anti-racis\*.tw. 836  
50  
51 16 antiracis\*.tw. 650  
52  
53 17 postcolonial\*.tw. 2067  
54  
55 18 colonial\*.tw. 6809  
56  
57 19 or/6-18 62234  
58  
59 20 exp health personnel attitudes/ 25839  
60  
61 21 medical residency/ 4825  
62  
63 22 ((health\* or medical or nurs\* or hospital) adj2 (personnel or provider\* or professional\*  
64 or worker\* or staff or specialist\* or employee\*)).tw.122311

23 (doctor\* or physician\* or practitioner\* or nurse\* or clinician\* or hospitalist\* or dentist\*  
 24 or therapist\* or physiotherapist\* or occupational therapist\* or psychologist\* or psychiatrist\* or  
 25 counsel?or\* or social worker\* or midwi\* or paramedic\* or emergency medical technician\* or  
 26 pharmacist\* or dietician\* or medic\* resident\*).tw. 579592  
 27 20 or 21 or 22 or 23 654864  
 28 education/ 40342  
 29 curriculum/ or curriculum development/ 34802  
 30 exp continuing education/ or professional development/ 26018  
 31 educational programs/ or educational program evaluation/ or multicultural education/  
 32 36396  
 33 personnel training/ or sensitivity training/ 11256  
 34 training/ or communication skills training/ or sensitivity training/ 27011  
 35 exp teaching/ 131059  
 36 (training or education\* or learn\* or teach\* or workshop\* or curricul\* or pedagog\* or  
 37 seminar\*).tw. 1241080  
 38 (professional development or staff development).tw. 27110  
 39 or/25-33 1267277  
 40 5 and 19 and 24 and 34 599  
 limit 35 to (chapter or "column/opinion" or "comment/reply" or editorial or letter or  
 review-book or review-media or review-software & other) 96  
 35 35 not 36 503  
 36 limit 37 to english language 484  
 37 limit 38 to up=20210308-20220512 41  
 38 remove duplicates from 39 41

### CINAHL Search History

Interface - EBSCOhost Research Databases

Search Screen - Advanced Search

Database - CINAHL Complete

| #   | Query                | Limiters/Expanders                                                     | Results |
|-----|----------------------|------------------------------------------------------------------------|---------|
| S31 | S29 AND S30          | Expanders - Apply equivalent subjects<br>Search modes - Boolean/Phrase | 109     |
| S30 | EM 20210308-20220512 | Expanders - Apply equivalent subjects                                  | 474,059 |

|     |                                                                                                      |                                                                                                                 |           |
|-----|------------------------------------------------------------------------------------------------------|-----------------------------------------------------------------------------------------------------------------|-----------|
|     |                                                                                                      | Search modes -<br>Boolean/Phrase                                                                                |           |
| S29 | S22 OR S26                                                                                           | Limiters - English<br>Language<br>Expanders - Apply<br>equivalent subjects<br>Search modes -<br>Boolean/Phrase  | 1,304     |
| S28 | S27                                                                                                  | Search modes -<br>Boolean/Phrase                                                                                | 1,173     |
| S27 | S22 OR S26                                                                                           | Limiters -<br>Published Date:<br>20060101-<br>20181231; English<br>Language<br>Search modes -<br>Boolean/Phrase | 709       |
| S26 | S6 AND S25                                                                                           | Search modes -<br>Boolean/Phrase                                                                                | 95        |
| S25 | S23 OR S24                                                                                           | Search modes -<br>Boolean/Phrase                                                                                | 1,087     |
| S24 | (MH "Cultural Safety/ED")                                                                            | Search modes -<br>Boolean/Phrase                                                                                | 38        |
| S23 | (MH "Cultural Competence/ED")                                                                        | Search modes -<br>Boolean/Phrase                                                                                | 1,049     |
| S22 | S6 AND S12 AND S17 AND S21                                                                           | Search modes -<br>Boolean/Phrase                                                                                | 1,144     |
| S21 | S18 OR S19 OR S20                                                                                    | Search modes -<br>Boolean/Phrase                                                                                | 1,285,878 |
| S20 | (professional development or staff<br>development)                                                   | Search modes -<br>Boolean/Phrase                                                                                | 73,618    |
| S19 | (training or education* or learn* or teach* or<br>workshop* or curricul* or pedagog* or<br>seminar*) | Search modes -<br>Boolean/Phrase                                                                                | 1,144,026 |

|     |                                                                                                                                                                                                                                                                                                                                        |                               |           |
|-----|----------------------------------------------------------------------------------------------------------------------------------------------------------------------------------------------------------------------------------------------------------------------------------------------------------------------------------------|-------------------------------|-----------|
| S18 | (MH "Education") OR (MH "Curriculum+") OR (MH "Education, Competency-Based") OR (MH "Teaching") OR (MH "Teaching Materials+") OR (MH "Teaching Methods+")                                                                                                                                                                              | Search modes - Boolean/Phrase | 293,141   |
| S17 | S13 OR S14 OR S15 OR S16                                                                                                                                                                                                                                                                                                               | Search modes - Boolean/Phrase | 1,524,544 |
| S16 | (doctor* or physician* or practitioner* or nurse* or clinician* or hospitalist* or dentist* or therapist* or physiotherapist* or occupational therapist* or psychologist* or psychiatrist* or counsel?or* or social worker* or midwi* or paramedic* or emergency medical technician* or pharmacist* or dietician* or medic* resident*) | Search modes - Boolean/Phrase | 1,220,148 |
| S15 | ((health* or medical or nurs* or hospital) N2 (personnel or provider* or professional* or worker* or staff or specialist* or employee*))                                                                                                                                                                                               | Search modes - Boolean/Phrase | 375,539   |
| S14 | (MH "Attitude of Health Personnel+")                                                                                                                                                                                                                                                                                                   | Search modes - Boolean/Phrase | 114,454   |
| S13 | (MH "Health Personnel+")                                                                                                                                                                                                                                                                                                               | Search modes - Boolean/Phrase | 627,401   |
| S12 | S7 OR S8 OR S9 OR S10 OR S11                                                                                                                                                                                                                                                                                                           | Search modes - Boolean/Phrase | 51,961    |
| S11 | cultural* competenc* or cultural* safe* or cultural awareness or cultural* sensitiv* or cultural* secur* or cultural humility or cross-cultural or cultural* respect* or anti-racis* or antiracis* or postcolonial* or colonial*                                                                                                       | Search modes - Boolean/Phrase | 31,303    |
| S10 | (MH "Cultural Diversity") OR (MH "Cultural Values")                                                                                                                                                                                                                                                                                    | Search modes - Boolean/Phrase | 24,283    |
| S9  | (MH "Transcultural Care")                                                                                                                                                                                                                                                                                                              | Search modes - Boolean/Phrase | 3,296     |
| S8  | (MH "Cultural Safety")                                                                                                                                                                                                                                                                                                                 | Search modes - Boolean/Phrase | 778       |

|    |                                                                                                                                                                                                                                                                                                                                                                                                               |                                  |        |
|----|---------------------------------------------------------------------------------------------------------------------------------------------------------------------------------------------------------------------------------------------------------------------------------------------------------------------------------------------------------------------------------------------------------------|----------------------------------|--------|
| S7 | (MH "Cultural Competence")                                                                                                                                                                                                                                                                                                                                                                                    | Search modes -<br>Boolean/Phrase | 11,142 |
| S6 | S1 OR S2 OR S5                                                                                                                                                                                                                                                                                                                                                                                                | Search modes -<br>Boolean/Phrase | 55,137 |
| S5 | S3 NOT S4                                                                                                                                                                                                                                                                                                                                                                                                     | Search modes -<br>Boolean/Phrase | 12,493 |
| S4 | (MH "India")                                                                                                                                                                                                                                                                                                                                                                                                  | Search modes -<br>Boolean/Phrase | 42,378 |
| S3 | TI ( (indian or indians) ) OR AB ( (indian or indians) )                                                                                                                                                                                                                                                                                                                                                      | Search modes -<br>Boolean/Phrase | 22,181 |
| S2 | (Aborigin* or Indigenous or Eskimo* or Inuit* or Inuk* or Metis or First Nations or First Nation or 1st nation or 1st nations or Native Canadian* or Native American* or Maori* or Pacific Islander* or American Indian* or Amerindian* or Native Alaska* or Alaska Native* or Native Hawaiian* or Torres Strait Islander* or on-reserve or off-reserve or tribal or autochtone* or amerindien* or indigene*) | Search modes -<br>Boolean/Phrase | 47,753 |
| S1 | (MH "Indigenous Peoples+") OR (MH "Health Services, Indigenous") OR (MH "Indigenous Health")                                                                                                                                                                                                                                                                                                                  | Search modes -<br>Boolean/Phrase | 23,870 |

## ProQuest Search Strategy

### Search Strategy

| Set# | Searched for                                                                                                                                                                                                                                                                                                                                                             | Databases                                                                                                                                                                         | Results |
|------|--------------------------------------------------------------------------------------------------------------------------------------------------------------------------------------------------------------------------------------------------------------------------------------------------------------------------------------------------------------------------|-----------------------------------------------------------------------------------------------------------------------------------------------------------------------------------|---------|
| S1   | noft((Aborigin* OR Indigenous OR Eskimo* OR Inuit* OR Inuk* OR Metis OR First Nations OR First Nation OR 1st nation OR 1st nations OR "Native Canadian*" OR "Native American*" OR Maori* OR "Pacific Islander*" OR "American Indian*" OR Amerindian* OR "Native Alaska*" OR "Alaska Native*" OR "Native Hawaiian*" OR "Torres Strait Islander*" OR "on-reserve" OR "off- | Applied Social Sciences Index & Abstracts (ASSIA), ERIC, International Bibliography of the Social Sciences (IBSS), ProQuest Dissertations & Theses Global, Sociological Abstracts | 7452    |

|    |                                                                                                                                                                                                                                                                                                                                                                                                                                                       |                                                                                                                                                                                   |        |
|----|-------------------------------------------------------------------------------------------------------------------------------------------------------------------------------------------------------------------------------------------------------------------------------------------------------------------------------------------------------------------------------------------------------------------------------------------------------|-----------------------------------------------------------------------------------------------------------------------------------------------------------------------------------|--------|
|    | reserve" OR tribal OR autochtone* OR amerindien* OR indigene*) AND la.exact("English") AND pd(>20201231)                                                                                                                                                                                                                                                                                                                                              |                                                                                                                                                                                   |        |
| S2 | noft(("cultural* competenc*" OR "cultural* safe*" OR "cultural awareness" OR "cultural* sensitiv*" OR "cultural* secur*" OR "cultural humility" OR "cross-cultural" OR "cultural* respect*" OR "anti-racis*" OR antiracis* OR postcolonial* OR colonial*)) AND la.exact("English") AND pd(>20201231)                                                                                                                                                  | Applied Social Sciences Index & Abstracts (ASSIA), ERIC, International Bibliography of the Social Sciences (IBSS), ProQuest Dissertations & Theses Global, Sociological Abstracts | 10129  |
| S3 | noft((health* OR medical OR nurs* OR hospital) NEAR/2 (personnel OR provider* OR professional* OR worker* OR staff OR specialist* OR employee*)) AND la.exact("English") AND pd(>20201231)                                                                                                                                                                                                                                                            | Applied Social Sciences Index & Abstracts (ASSIA), ERIC, International Bibliography of the Social Sciences (IBSS), ProQuest Dissertations & Theses Global, Sociological Abstracts | 10349  |
| S4 | noft((((doctor* OR physician* OR practitioner* OR nurse* OR clinician* OR hospitalist* OR dentist* OR therapist* OR physiotherapist* OR ("occupational therapist" OR "occupational therapists") OR psychologist* OR psychiatrist* OR counsellor* OR ("social worker" OR "social workers") OR midwi* OR paramedic* OR "emergency medical technician*" OR pharmacist* OR dietician* OR "medic* resident*")))) AND la.exact("English") AND pd(>20201231) | Applied Social Sciences Index & Abstracts (ASSIA), ERIC, International Bibliography of the Social Sciences (IBSS), ProQuest Dissertations & Theses Global, Sociological Abstracts | 31501  |
| S5 | noft(((training OR education* OR learn* OR teach* OR workshop* OR curricul* OR pedagog* OR seminar* OR "professional development" OR "staff development")))) AND la.exact("English") AND pd(>20201231)                                                                                                                                                                                                                                                | Applied Social Sciences Index & Abstracts (ASSIA), ERIC, International Bibliography of the Social Sciences (IBSS), ProQuest Dissertations & Theses Global, Sociological Abstracts | 115033 |
| S6 | (S1 AND S2 AND (S3 OR S4) AND S5)                                                                                                                                                                                                                                                                                                                                                                                                                     | Applied Social Sciences Index & Abstracts (ASSIA), ERIC, International Bibliography of the Social Sciences (IBSS), ProQuest Dissertations & Theses Global, Sociological Abstracts | 77     |

## Bibliography of Indigenous Peoples in North America (EBSCOhost)

### 2 Results

(( ((health\* or medical or nurs\* or hospital) N2 (personnel or provider\* or professional\* or worker\* or staff or specialist\* or employee\*)) ) OR ( (doctor\* or physician\* or practitioner\* or nurse\* or clinician\* or hospitalist\* or dentist\* or therapist\* or physiotherapist\* or occupational therapist\* or psychologist\* or psychiatrist\* or counsel?or\* or social worker\* or midwi\* or paramedic\* or emergency medical technician\* or pharmacist\* or dietician\* or medic\* resident\*) ))

AND

( ("cultural\* competenc\*" or "cultural\* safe\*" or "cultural awareness" or "cultural\* sensitiv\*" or "cultural\* secur\*" or "cultural humility" or "cross-cultural" or "cultural\* respect\*" or "anti-racis\*" or antiracis\*) )

AND

( (training or education\* or learn\* or teach\* or workshop\* or curricul\* or pedagog\* or seminar\* or "professional development" or "staff development") )

Limit to 2021-2022, English Language, Academic Journals

### Web of Science

Science Citation Index Expanded (SCI-EXPANDED)

Social Sciences Citation Index (SSCI)

93 Results

((TS=("cultural\* competenc\*" or "cultural\* safe\*" or "cultural awareness" or "cultural\* sensitiv\*" or "cultural\* secur\*" or "cultural humility" or "cross-cultural" or "cultural\* respect\*" or "anti-racis\*" or antiracis\*) AND TS=(training or education\* or learn\* or teach\* or workshop\* or curricul\* or pedagog\* or seminar\* or "professional development" or "staff development") AND TS=(Aborigin\* or Indigenous or Eskimo\* or Inuit\* or Inuk\* or Metis or First Nations or First Nation or 1st nation or 1st nations or Native Canadian\* or Native American\* or Maori\* or Pacific Islander\* or American Indian\* or Amerindian\* or Native Alaska\* or Alaska Native\* or Native Hawaiian\* or Torres Strait Islander\* or on-reserve or off-reserve or tribal or autochtone\* or amerindien\* or indigene\*) AND TS=("health care" or healthcare or hospital\* or medical or nurses or doctors)))

Timespan: 2021-03-08 to 2022-05-12 (Index Date)



## Supplementary Figure 3

## Well Living House Quality Appraisal Tool

Citation (Title, Author, Date) [INSERT FOR EACH STUDY]

Local Community Relevance of Method and Measures (Score out of 4)

|                                                                                                                                                         |                                                                                                                                                                                                                                                                                                                                                                                                                                                                                                             |
|---------------------------------------------------------------------------------------------------------------------------------------------------------|-------------------------------------------------------------------------------------------------------------------------------------------------------------------------------------------------------------------------------------------------------------------------------------------------------------------------------------------------------------------------------------------------------------------------------------------------------------------------------------------------------------|
| Did the measures of success reflect local Indigenous community understandings of success?                                                               | <p>Yes = 2 (look for: outcomes are derived from community members/ are the outcomes reflecting indigenous concepts evidence provided explicitly in the text where did evaluation take place, who collected evaluation data?)</p> <p>Partial = 1 (hints of including local community values/beliefs/knowledge systems in text and therefore assumption made by reviewers that evidence is present)</p> <p>No = 0 (nothing was said or author(s) indicated that success was not defined by the community)</p> |
| Had methods and tools been tested and validated previously in a similar Indigenous context and reviewed for relevance by appropriate community members? | <p>Yes = 2 (evidence is provided explicitly in text)</p> <p>Partial = 1 (hints of using a tool that has been used in Indigenous contexts and therefore assumption made by reviewers that evidence is present)</p> <p>No = 0 (nothing was said or author(s) said that the evaluation method/tool has not been used in Indigenous contexts)</p>                                                                                                                                                               |

Rigour and internal validity of the evaluation method (Score out of 4)

|                                                                                        |                                                                                                                                                                                                                                                                                                                                                                                                                                                                                                                                                                                                                                                                                                                                                                |
|----------------------------------------------------------------------------------------|----------------------------------------------------------------------------------------------------------------------------------------------------------------------------------------------------------------------------------------------------------------------------------------------------------------------------------------------------------------------------------------------------------------------------------------------------------------------------------------------------------------------------------------------------------------------------------------------------------------------------------------------------------------------------------------------------------------------------------------------------------------|
| Do the quantitative or qualitative methods meet relevant rigour and internal validity? | <p>Excellent = 4<br/>Fair = 3<br/>Barely Acceptable = 2<br/>Poor = 1</p> <p>Generally: Is the study design appropriate for evaluation research question(s)? Are the conclusions supported and justified by the results?</p> <p><u>Quantitative</u>: Is the sample size described and justified? Are the instruments/tools already validated?</p> <p>Are threats to validity addressed (such as confounding factors)?</p> <p><u>Qualitative</u>: Are the participants selected using appropriate strategies (such as purposive sample or until saturation is reached)? Is there clearly articulated theoretical approach/methodology/ data collection methods and analytic lens – do these fit together? Is there evidence of truthfulness of the findings?</p> |
|----------------------------------------------------------------------------------------|----------------------------------------------------------------------------------------------------------------------------------------------------------------------------------------------------------------------------------------------------------------------------------------------------------------------------------------------------------------------------------------------------------------------------------------------------------------------------------------------------------------------------------------------------------------------------------------------------------------------------------------------------------------------------------------------------------------------------------------------------------------|

Strength of the Evidence (score out of 4)

|                         |                                                                                                                                                                                                                                                                                                                        |
|-------------------------|------------------------------------------------------------------------------------------------------------------------------------------------------------------------------------------------------------------------------------------------------------------------------------------------------------------------|
| Is the evidence strong? | <p>Excellent = 4<br/>Fair = 3<br/>Barely Acceptable = 2<br/>Poor = 1</p> <p><u>Quantitative</u>: Does the evidence have adequate power and statistical significance? Is the response rate reasonable?</p> <p><u>Qualitative</u>: Are there major and convincing themes from triangulation, and/or member checking?</p> |
|-------------------------|------------------------------------------------------------------------------------------------------------------------------------------------------------------------------------------------------------------------------------------------------------------------------------------------------------------------|

Total Score:

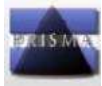

## PRISMA 2020 Checklist

| Section and Topic             | Item # | Checklist item                                                                                                                                                                                                                                                                                       | Location where item is reported |
|-------------------------------|--------|------------------------------------------------------------------------------------------------------------------------------------------------------------------------------------------------------------------------------------------------------------------------------------------------------|---------------------------------|
| <b>TITLE</b>                  |        |                                                                                                                                                                                                                                                                                                      |                                 |
| Title                         | 1      | Identify the report as a systematic review.                                                                                                                                                                                                                                                          | pg.1                            |
| <b>ABSTRACT</b>               |        |                                                                                                                                                                                                                                                                                                      |                                 |
| Abstract                      | 2      | See the PRISMA 2020 for Abstracts checklist.                                                                                                                                                                                                                                                         | pg. 1-2                         |
| <b>INTRODUCTION</b>           |        |                                                                                                                                                                                                                                                                                                      |                                 |
| Rationale                     | 3      | Describe the rationale for the review in the context of existing knowledge.                                                                                                                                                                                                                          | pg. 1-3                         |
| Objectives                    | 4      | Provide an explicit statement of the objective(s) or question(s) the review addresses.                                                                                                                                                                                                               | pg. 5                           |
| <b>METHODS</b>                |        |                                                                                                                                                                                                                                                                                                      |                                 |
| Eligibility criteria          | 5      | Specify the inclusion and exclusion criteria for the review and how studies were grouped for the syntheses.                                                                                                                                                                                          | pg. 6                           |
| Information sources           | 6      | Specify all databases, registers, websites, organisations, reference lists and other sources searched or consulted to identify studies. Specify the date when each source was last searched or consulted.                                                                                            | pg. 5-6                         |
| Search strategy               | 7      | Present the full search strategies for all databases, registers and websites, including any filters and limits used.                                                                                                                                                                                 | Supplement 1                    |
| Selection process             | 8      | Specify the methods used to decide whether a study met the inclusion criteria of the review, including how many reviewers screened each record and each report retrieved, whether they worked independently, and if applicable, details of automation tools used in the process.                     | pg. 6-7                         |
| Data collection process       | 9      | Specify the methods used to collect data from reports, including how many reviewers collected data from each report, whether they worked independently, any processes for obtaining or confirming data from study investigators, and if applicable, details of automation tools used in the process. | pg. 7                           |
| Data items                    | 10a    | List and define all outcomes for which data were sought. Specify whether all results that were compatible with each outcome domain in each study were sought (e.g. for all measures, time points, analyses), and if not, the methods used to decide which results to collect.                        | pg. 7-8                         |
|                               | 10b    | List and define all other variables for which data were sought (e.g. participant and intervention characteristics, funding sources). Describe any assumptions made about any missing or unclear information.                                                                                         | pg. 7-8                         |
| Study risk of bias assessment | 11     | Specify the methods used to assess risk of bias in the included studies, including details of the tool(s) used, how many reviewers assessed each study and whether they worked independently, and if applicable, details of automation tools used in the process.                                    | pg. 8-9; Supplemental 2         |
| Effect measures               | 12     | Specify for each outcome the effect measure(s) (e.g. risk ratio, mean difference) used in the synthesis or presentation of results.                                                                                                                                                                  | N/A                             |
| Synthesis methods             | 13a    | Describe the processes used to decide which studies were eligible for each synthesis (e.g. tabulating the study intervention characteristics and comparing against the planned groups for each synthesis (item #5)).                                                                                 | pg. 9                           |
|                               | 13b    | Describe any methods required to prepare the data for presentation or synthesis, such as handling of missing summary statistics, or data conversions.                                                                                                                                                | N/A                             |
|                               | 13c    | Describe any methods used to tabulate or visually display results of individual studies and syntheses.                                                                                                                                                                                               | N/A                             |
|                               | 13d    | Describe any methods used to synthesize results and provide a rationale for the choice(s). If meta-analysis was performed, describe the model(s), method(s) to identify the presence and extent of statistical heterogeneity, and software package(s) used.                                          | pg. 7                           |
|                               | 13e    | Describe any methods used to explore possible causes of heterogeneity among study results (e.g. subgroup analysis, meta-regression).                                                                                                                                                                 | N/A                             |
|                               | 13f    | Describe any sensitivity analyses conducted to assess robustness of the synthesized results.                                                                                                                                                                                                         | N/A                             |
| Reporting bias assessment     | 14     | Describe any methods used to assess risk of bias due to missing results in a synthesis (arising from reporting biases).                                                                                                                                                                              | N/A                             |

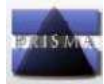

## PRISMA 2020 Checklist

| Section and Topic                              | Item # | Checklist item                                                                                                                                                                                                                                                                       | Location where item is reported |
|------------------------------------------------|--------|--------------------------------------------------------------------------------------------------------------------------------------------------------------------------------------------------------------------------------------------------------------------------------------|---------------------------------|
| Certainty assessment                           | 15     | Describe any methods used to assess certainty (or confidence) in the body of evidence for an outcome.                                                                                                                                                                                | N/A                             |
| <b>RESULTS</b>                                 |        |                                                                                                                                                                                                                                                                                      |                                 |
| Study selection                                | 16a    | Describe the results of the search and selection process, from the number of records identified in the search to the number of studies included in the review, ideally using a flow diagram.                                                                                         | pg. 9 and Figure 1              |
|                                                | 16b    | Cite studies that might appear to meet the inclusion criteria, but which were excluded, and explain why they were excluded.                                                                                                                                                          | pg. 9                           |
| Study characteristics                          | 17     | Cite each included study and present its characteristics.                                                                                                                                                                                                                            | pg. 9-14                        |
| Risk of bias in studies                        | 18     | Present assessments of risk of bias for each included study.                                                                                                                                                                                                                         | N/A                             |
| Results of individual studies                  | 19     | For all outcomes, present, for each study: (a) summary statistics for each group (where appropriate) and (b) an effect estimate and its precision (e.g. confidence/credible interval), ideally using structured tables or plots.                                                     | Table 1-3                       |
| Results of syntheses                           | 20a    | For each synthesis, briefly summarise the characteristics and risk of bias among contributing studies.                                                                                                                                                                               | pg. 14                          |
|                                                | 20b    | Present results of all statistical syntheses conducted. If meta-analysis was done, present for each the summary estimate and its precision (e.g. confidence/credible interval) and measures of statistical heterogeneity. If comparing groups, describe the direction of the effect. | N/A                             |
|                                                | 20c    | Present results of all investigations of possible causes of heterogeneity among study results.                                                                                                                                                                                       | N/A                             |
|                                                | 20d    | Present results of all sensitivity analyses conducted to assess the robustness of the synthesized results.                                                                                                                                                                           | N/A                             |
| Reporting biases                               | 21     | Present assessments of risk of bias due to missing results (arising from reporting biases) for each synthesis assessed.                                                                                                                                                              | N/A                             |
| Certainty of evidence                          | 22     | Present assessments of certainty (or confidence) in the body of evidence for each outcome assessed.                                                                                                                                                                                  | N/A                             |
| <b>DISCUSSION</b>                              |        |                                                                                                                                                                                                                                                                                      |                                 |
| Discussion                                     | 23a    | Provide a general interpretation of the results in the context of other evidence.                                                                                                                                                                                                    | pg. 14-17                       |
|                                                | 23b    | Discuss any limitations of the evidence included in the review.                                                                                                                                                                                                                      | pg. 14-17                       |
|                                                | 23c    | Discuss any limitations of the review processes used.                                                                                                                                                                                                                                | N/A                             |
|                                                | 23d    | Discuss implications of the results for practice, policy, and future research.                                                                                                                                                                                                       | pg. 16-17                       |
| <b>OTHER INFORMATION</b>                       |        |                                                                                                                                                                                                                                                                                      |                                 |
| Registration and protocol                      | 24a    | Provide registration information for the review, including register name and registration number, or state that the review was not registered.                                                                                                                                       | pg. 3                           |
|                                                | 24b    | Indicate where the review protocol can be accessed, or state that a protocol was not prepared.                                                                                                                                                                                       | pg. 23                          |
|                                                | 24c    | Describe and explain any amendments to information provided at registration or in the protocol.                                                                                                                                                                                      | N/A                             |
| Support                                        | 25     | Describe sources of financial or non-financial support for the review, and the role of the funders or sponsors in the review.                                                                                                                                                        | pg. 24                          |
| Competing interests                            | 26     | Declare any competing interests of review authors.                                                                                                                                                                                                                                   | pg. 24                          |
| Availability of data, code and other materials | 27     | Report which of the following are publicly available and where they can be found: template data collection forms; data extracted from included studies; data used for all analyses; analytic code; any other materials used in the review.                                           | pg. 23                          |

From: Page MJ, McKenzie JE, Bossuyt PM, et al. The PRISMA 2020 statement: an updated guideline for reporting systematic reviews. *BMJ* 2021;372:n71. doi:10.1136/bmj.n71

For more information, visit: [www.prisma-statement.org](http://www.prisma-statement.org).

# BMJ Open

## Systematic review of Indigenous Cultural Safety training interventions for health care professionals in Australia, Canada, New Zealand and the United States.

|                                 |                                                                                                                                                                                                                                                                                                                                                                                                                                                                                                                                                                                                                |
|---------------------------------|----------------------------------------------------------------------------------------------------------------------------------------------------------------------------------------------------------------------------------------------------------------------------------------------------------------------------------------------------------------------------------------------------------------------------------------------------------------------------------------------------------------------------------------------------------------------------------------------------------------|
| Journal:                        | <i>BMJ Open</i>                                                                                                                                                                                                                                                                                                                                                                                                                                                                                                                                                                                                |
| Manuscript ID                   | bmjopen-2023-073320.R1                                                                                                                                                                                                                                                                                                                                                                                                                                                                                                                                                                                         |
| Article Type:                   | Original research                                                                                                                                                                                                                                                                                                                                                                                                                                                                                                                                                                                              |
| Date Submitted by the Author:   | 20-Jul-2023                                                                                                                                                                                                                                                                                                                                                                                                                                                                                                                                                                                                    |
| Complete List of Authors:       | Hardy, Billie-Jo; University of Toronto - St George Campus, Dalla Lana School of Public Health; Unity Health Toronto, Well Living House, Li Ka Shing Knowledge Institute<br>Filipenko, Sam; Unity Health Toronto, Well Living House, Li Ka Shing Knowledge Institute<br>Smylie, Diane; Ontario Federation of Indigenous Friendship Centres<br>Ziegler, Carolyn; Unity Health Toronto, Health Sciences Library, St. Michael's Hospital<br>Smylie, Janet; Unity Health Toronto, Well Living House, Li Ka Shing Knowledge Institute; University of Toronto - St George Campus, Dalla Lana School of Public Health |
| <b>Primary Subject Heading</b>: | Medical education and training                                                                                                                                                                                                                                                                                                                                                                                                                                                                                                                                                                                 |
| Secondary Subject Heading:      | Health policy                                                                                                                                                                                                                                                                                                                                                                                                                                                                                                                                                                                                  |
| Keywords:                       | EDUCATION & TRAINING (see Medical Education & Training), Health Equity, Health policy < HEALTH SERVICES ADMINISTRATION & MANAGEMENT, Quality in health care < HEALTH SERVICES ADMINISTRATION & MANAGEMENT, Systematic Review                                                                                                                                                                                                                                                                                                                                                                                   |
|                                 |                                                                                                                                                                                                                                                                                                                                                                                                                                                                                                                                                                                                                |

SCHOLARONE™  
Manuscripts



I, the Submitting Author has the right to grant and does grant on behalf of all authors of the Work (as defined in the below author licence), an exclusive licence and/or a non-exclusive licence for contributions from authors who are: i) UK Crown employees; ii) where BMJ has agreed a CC-BY licence shall apply, and/or iii) in accordance with the terms applicable for US Federal Government officers or employees acting as part of their official duties; on a worldwide, perpetual, irrevocable, royalty-free basis to BMJ Publishing Group Ltd ("BMJ") its licensees and where the relevant Journal is co-owned by BMJ to the co-owners of the Journal, to publish the Work in this journal and any other BMJ products and to exploit all rights, as set out in our [licence](#).

The Submitting Author accepts and understands that any supply made under these terms is made by BMJ to the Submitting Author unless you are acting as an employee on behalf of your employer or a postgraduate student of an affiliated institution which is paying any applicable article publishing charge ("APC") for Open Access articles. Where the Submitting Author wishes to make the Work available on an Open Access basis (and intends to pay the relevant APC), the terms of reuse of such Open Access shall be governed by a Creative Commons licence – details of these licences and which [Creative Commons](#) licence will apply to this Work are set out in our licence referred to above.

Other than as permitted in any relevant BMJ Author's Self Archiving Policies, I confirm this Work has not been accepted for publication elsewhere, is not being considered for publication elsewhere and does not duplicate material already published. I confirm all authors consent to publication of this Work and authorise the granting of this licence.

1  
2  
3  
4 1 **Systematic review of Indigenous Cultural Safety training interventions for**  
5  
6 2 **health care professionals in Australia, Canada, New Zealand and the**  
7  
8 3 **United States.**  
9  
10 4

11  
12 5 **AUTHORS**  
13  
14

15 6 Billie-Jo Hardy, Assistant Professor<sup>1,2</sup>, Sam Filipenko, Research Manager<sup>2</sup>, Diane  
16  
17  
18 7 Smylie, Director<sup>3</sup>, Caroline Ziegler, Health Librarian<sup>4</sup> and Janet Smylie, Director<sup>2,1</sup>  
19  
20  
21 8

22  
23 9 <sup>1</sup>Dalla Lana School of Public Health, University of Toronto, Toronto, Canada  
24  
25

26 10 <sup>2</sup>Well Living House, Unity Health Toronto – St. Michael's Hospital, Toronto, Canada  
27  
28

29 11 <sup>3</sup>Ontario Federation of Indigenous Friendship Centres, Toronto, Canada  
30  
31

32 12 <sup>4</sup>Health Sciences Library, St. Michael's Hospital, Unity Health Toronto, Toronto, Canada  
33  
34 13

35  
36 14 **CORRESPONDING AUTHOR**  
37  
38

39 15 Billie-Jo Hardy, PhD.  
40  
41

42 16 Dalla Lana School of Public Health, University of Toronto,  
43  
44

45 17 155 College St., Room 403, Toronto, ON M5T 3M7, Canada  
46  
47

48 18 Telephone No.: +1-416-841-2709  
49  
50

51 19 [billiejo.hardy@utoronto.ca](mailto:billiejo.hardy@utoronto.ca)  
52  
53 20

54  
55 21 **KEYWORDS**  
56  
57  
58  
59  
60

1  
2  
3  
4  
5  
6  
7  
8  
9  
10  
11  
12  
13  
14  
15  
16  
17  
18  
19  
20  
21  
22  
23  
24  
25  
26  
27  
28  
29  
30  
31  
32  
33  
34  
35  
36  
37  
38  
39  
40  
41  
42  
43  
44  
45  
46  
47  
48  
49  
50  
51  
52  
53  
54  
55  
56  
57  
58  
59  
60

22 Indigenous health, Education & Training, Health Equity, Health Policy, Quality in Health

23 Care

24

25 **WORDCOUNT** 5066

26

27

28

29

For peer review only

1  
2  
3  
4 30 **ABSTRACT**

5  
6 31 **Objective:** To synthesize and appraise the design and impact of peer-reviewed  
7  
8  
9 32 evaluations of Indigenous cultural safety training programs and  
10  
11 33 workshops for health care workers in Australia, Canada, New  
12  
13  
14 34 Zealand, and/or the United States of America.

15  
16  
17 35 **Methods:** We completed a systematic review of studies that evaluated the  
18  
19 36 outcomes of educational interventions designed to improve cultural  
20  
21 37 safety, cultural competency, and/or cultural awareness for non-  
22  
23 38 Indigenous adult health care professionals in Australia, Canada,  
24  
25 39 New Zealand, or the United States.

26  
27  
28  
29  
30 40 We searched key electronic databases and grey literature from  
31  
32 41 January 1, 2006 to May 12, 2022. Our team of Indigenous and allied  
33  
34 42 scientists tailored existing data extraction and quality appraisal tools  
35  
36 43 with input from Indigenous health service partners. We synthesized  
37  
38 44 results using an iterative narrative approach.

39  
40  
41  
42  
43 45 **Results:** 2,442 unique titles and abstracts met screening criteria. 13 full texts  
44  
45 46 met full inclusion and quality appraisal criteria. Study designs,  
46  
47 47 intervention characteristics, and outcome measures were  
48  
49 48 heterogenous. Nine studies used mixed methods, two used  
50  
51 49 qualitative methods, and two used quantitative methods. Training  
52  
53  
54  
55  
56  
57  
58  
59  
60



1  
2  
3  
4 50 participants included nurses, family practice residents, specialized  
5  
6 51 practitioners and providers serving specific subpopulations.  
7  
8  
9 52 Theoretical frameworks and pedagogical approaches varied across  
10  
11 53 programs, which contained overlapping course content. Study  
12  
13  
14 54 outcomes were primarily learner-oriented, and focused on self-  
15  
16 55 reported changes in knowledge, awareness, beliefs, attitudes, and/or  
17  
18  
19 56 the confidence and skills to provide care for Indigenous peoples. The  
20  
21  
22 57 involvement of local Indigenous communities in the development,  
23  
24 58 implementation, and evaluation of the interventions was limited.  
25  
26  
27 59 Conclusion: There is limited evidence regarding the effectiveness of specific  
28  
29  
30 60 content and approaches to cultural safety training on improving non-  
31  
32 61 Indigenous health professionals' knowledge of and skills to deliver  
33  
34  
35 62 quality, non-discriminatory care to Indigenous patients. Future  
36  
37 63 research is needed that advances the methodological rigour of  
38  
39  
40 64 training evaluations, is focused on observed clinical outcomes, and  
41  
42  
43 65 is better aligned to local, regional, and/or national Indigenous  
44  
45 66 priorities and needs.  
46  
47  
48 67

49  
50  
51 68 **SYSTEMATIC REVIEW REGISTRATION** Not Applicable  
52  
53  
54 69

## 70 STRENGTHS AND LIMITATIONS OF THIS STUDY

- 71
- 72 • Our systematic review built upon existing tailored Indigenous systematic review  
73 methodologies to implement a method aimed at optimizing relevance for Indigenous  
74 peoples by ensuring that their expertise and knowledge was centred throughout the  
75 project.
  - 76 • Our systematic review applied data extraction and appraisal tools that were designed  
77 and implemented in partnership with Indigenous community partners.
  - 78 • The review is limited to ICS programs with evaluations that have been published in  
79 the peer review and grey literature and as such, may not have captured the true  
80 breadth of existing Indigenous cultural safety training programs and related  
81 evaluations.
  - 82 • The review is limited to interventions directed towards health care providers.

## 84 INTRODUCTION

85 Colonization has long been recognized by Indigenous peoples from around the world as  
86 a cross-cutting and foundational determinant of Indigenous/non-Indigenous health  
87 disparities.(1) More recently, a series of apologies by world leaders has enhanced general  
88 societal awareness of anti-Indigenous colonial injustices, abuses, and harms.(2-5)  
89 Simultaneously, a rapidly growing body of academic scholarship clearly demonstrates

1  
2  
3  
4 90 ongoing, widespread, and harmful anti-Indigenous colonial policies and practices that are  
5  
6 91 rooted in racist ideologies of white supremacy.(6-12)  
7  
8  
9 92  
10  
11 93 Common manifestations of persistent colonialism include the emergence of deeply rooted  
12  
13  
14 94 negative anti-Indigenous stereotyping and assumptions in micro level social interactions,  
15  
16  
17 95 organizational design, and social architecture.(10, 13, 14) In healthcare contexts, this  
18  
19 96 includes: racist contamination of the healthcare provider-Indigenous patient interface;  
20  
21  
22 97 organizational level barriers to equitable Indigenous health services access; and  
23  
24 98 Indigenous/settler imbalances in the distribution of health and social resources.(10, 13,  
25  
26  
27 99 15) Social media and linked public reporting have begun to expose the life-threatening  
28  
29  
30 100 severity of explicit attitudinal anti-Indigenous racism but there can be resistance to  
31  
32 101 acknowledging the underlying challenges of ongoing implicit and system level failures.  
33  
34  
35 102 For example, Joyce Echequan was able to record the anti-Indigenous racist  
36  
37 103 disparagement she experienced from healthcare staff when seeking treatment for a life-  
38  
39  
40 104 threatening illness at the Lanaudiere hospital in Joliette, Quebec immediately prior to her  
41  
42  
43 105 death.(16) The behaviours of the individual providers were widely regarded as grossly  
44  
45 106 unacceptable following media reporting. However, the Premier of Quebec refused to  
46  
47  
48 107 acknowledge the role of systemic racism in Joyce's death.(17)  
49  
50  
51 108  
52  
53 109 Multiple studies have demonstrated that implicit race preference bias is common among  
54  
55  
56 110 health care providers,(18) even when they explicitly express anti-racist values and  
57  
58  
59  
60

1  
2  
3  
4 111 attitudes.(19) Further, implicit race preference bias has been linked to differential  
5  
6 112 application of clinical practice guidelines, with non-adherence disproportionately  
7  
8  
9 113 impacting socially excluded racialized and ethnic patient populations.(20)

10  
11 114  
12  
13  
14 115 Not surprisingly, given the broad scope and injurious impacts of anti-Indigenous racism,  
15  
16 116 its interruption in healthcare contexts has emerged as a priority for Indigenous and allied  
17  
18  
19 117 policymakers, practitioners, and researchers. Of the Truth and Reconciliation  
20  
21  
22 118 Commission of Canada's seven Calls to Action in the domain of health, two address the  
23  
24 119 need to provide "cultural competency" training for healthcare providers.(21) These policy  
25  
26  
27 120 recommendations have been accompanied by a rapid growth of interventions designed  
28  
29  
30 121 to interrupt anti-Indigenous racism, primarily through educational interventions for  
31  
32 122 healthcare providers and trainees.(22,23) Upon engagement with this literature,(22) it  
33  
34  
35 123 became apparent to our team that the approach, content, and evaluations of existing  
36  
37  
38 124 cultural competency trainings vary widely. It was unclear which training approaches and  
39  
40 125 strategies were most effective, especially with respect to improving disparities in clinical  
41  
42  
43 126 outcomes.

44  
45 127  
46  
47  
48 128 In order to address these knowledge gaps, we conducted a systematic literature review  
49  
50  
51 129 focused on the design and impacts of existing Indigenous cultural safety and competency  
52  
53 130 training interventions. The primary aim of this review was to identify, appraise and  
54  
55  
56 131 synthesize the design and impacts of these educational interventions on non-Indigenous

1  
2  
3  
4 132 health care professionals' knowledge, attitudes, and practices. The secondary aim was  
5  
6 133 to investigate whether specific training approaches, strategies, formats, or educational  
7  
8  
9 134 content were more successful, and if yes, for whom and in what ways. To help manage  
10  
11 135 heterogeneity, we restricted this review to Indigenous specific educational interventions  
12  
13  
14 136 in Australia, Canada, New Zealand, and the United States. These globally affluent  
15  
16 137 countries share both relatively well-resourced health and social service systems and  
17  
18  
19 138 history of European colonization that continues to negatively impact the health and  
20  
21  
22 139 wellbeing of First Peoples, including equitable access to these service systems.  
23  
24  
25  
26

## 27 141 **METHODS**

28  
29  
30 142 The Preferred Reporting Items for Systematic Reviews and Meta-Analyses (PRISMA)  
31  
32 143 2020 statement was used to guide our literature review and reporting.(24) Supplementary  
33  
34  
35 144 Figure 1 documents the process of article screening for inclusion in our analysis. Tables  
36  
37  
38 145 1 and 2 summarize key aspects of the included studies: intervention content; participants;  
39  
40 146 evaluation methods; and study outcomes.  
41  
42  
43  
44  
45  
46  
47  
48  
49  
50  
51  
52  
53  
54  
55  
56  
57  
58  
59  
60

**Table 1. Summary of Interventions**

| Author(s)                          | Year | Country     | Intervention                                                                 | Content Delivery                                                                                               | Setting  | Core Curriculum Topics                                                                                                                                                                                                                                                                                                                                | Participants                                                           |
|------------------------------------|------|-------------|------------------------------------------------------------------------------|----------------------------------------------------------------------------------------------------------------|----------|-------------------------------------------------------------------------------------------------------------------------------------------------------------------------------------------------------------------------------------------------------------------------------------------------------------------------------------------------------|------------------------------------------------------------------------|
| Barajas J.                         | 2021 | USA         | 10 minute online PowerPoint presentation and YouTube video                   | Online module(s)                                                                                               | Online   | Cultural knowledge, spirituality, and beliefs; professional practice issues; interpersonal communication skills                                                                                                                                                                                                                                       | Emergency Department healthcare providers and staff (n=6)              |
| Barnabe C., et al.                 | 2021 | Canada      | Phase I: half-day workshop, and Phase II: full day workshop (6 months later) | Online module(s); interactive group discussions, reflections, and experiential exercises                       | Clinical | Determinants of Indigenous health; oppressive and racist policies, colonization and white racial privilege; specific health focus                                                                                                                                                                                                                     | Rheumatologists (n=34)                                                 |
| Brewer K., McCann C., & Harwood M. | 2020 | New Zealand | 2 self-paced online modules                                                  | Online module(s); self-learning tools; personal reflections                                                    | Online   | Family structures, kinship, and responsibilities; cultural knowledge, spirituality, and beliefs; past policies and practices; determinants of Indigenous health; health disparities; professional practice issues; oppressive and racist policies, colonization and white racial privilege; interpersonal communication skills; specific health focus | Speech Language Therapists (n=11)                                      |
| Chapman R., Martin C., & Smith T.  | 2014 | Australia   | 3 x 2hour workshops over 6 weeks                                             | Didactic lecture; interactive group discussions, reflections, and experiential exercises; personal reflections | Clinical | Cultural knowledge and ideology                                                                                                                                                                                                                                                                                                                       | Emergency Department: nursing, clinical and allied health staff (n=48) |
| Crowshoe L., et al.                | 2018 | Canada      | Full day (8 hours) workshop                                                  | Interactive group discussions, reflections, and experiential exercises                                         | Clinical | Determinants of Indigenous health; professional practice issues; oppressive and racist policies, colonization and white racial privilege; interpersonal communication skills                                                                                                                                                                          | Family physicians and Allied Health Professionals (n=32)               |

|    |                                      |      |           |                                                                                                                     |                                                                                                                |                      |                                                                                                                                                                                                                                                                                                                                         |                                                                                                                            |
|----|--------------------------------------|------|-----------|---------------------------------------------------------------------------------------------------------------------|----------------------------------------------------------------------------------------------------------------|----------------------|-----------------------------------------------------------------------------------------------------------------------------------------------------------------------------------------------------------------------------------------------------------------------------------------------------------------------------------------|----------------------------------------------------------------------------------------------------------------------------|
| 1  | Hinton R., et al.                    | 2014 | Australia | 3 full-day workshops over 2 months                                                                                  | Didactic lecture; interactive group discussions, reflections, and experiential exercises; self-learning tools  | Clinical             | Specific health focus                                                                                                                                                                                                                                                                                                                   | Clinical and Allied Health Staff (n=21)                                                                                    |
| 2  |                                      |      |           |                                                                                                                     |                                                                                                                |                      |                                                                                                                                                                                                                                                                                                                                         |                                                                                                                            |
| 3  |                                      |      |           |                                                                                                                     |                                                                                                                |                      |                                                                                                                                                                                                                                                                                                                                         |                                                                                                                            |
| 4  |                                      |      |           |                                                                                                                     |                                                                                                                |                      |                                                                                                                                                                                                                                                                                                                                         |                                                                                                                            |
| 5  |                                      |      |           |                                                                                                                     |                                                                                                                |                      |                                                                                                                                                                                                                                                                                                                                         |                                                                                                                            |
| 6  | Hulko W., et al.                     | 2021 | Canada    | 8-10 hours of online training over 8-10 weeks, and a full day Storytelling Session and Talking Circle with an Elder | Online module(s); story telling and talking circles; knowledge quiz; personal reflections                      | Online and classroom | Indigenous diversity; family structures, kinship, and responsibilities; cultural knowledge, spirituality, and beliefs; past policies and practices; determinants of Indigenous health; health disparities; professional practice issues; oppressive and racist policies, colonization and white racial privilege; specific health focus | Nurses (n=38)                                                                                                              |
| 7  |                                      |      |           |                                                                                                                     |                                                                                                                |                      |                                                                                                                                                                                                                                                                                                                                         |                                                                                                                            |
| 8  |                                      |      |           |                                                                                                                     |                                                                                                                |                      |                                                                                                                                                                                                                                                                                                                                         |                                                                                                                            |
| 9  |                                      |      |           |                                                                                                                     |                                                                                                                |                      |                                                                                                                                                                                                                                                                                                                                         |                                                                                                                            |
| 10 |                                      |      |           |                                                                                                                     |                                                                                                                |                      |                                                                                                                                                                                                                                                                                                                                         |                                                                                                                            |
| 11 |                                      |      |           |                                                                                                                     |                                                                                                                |                      |                                                                                                                                                                                                                                                                                                                                         |                                                                                                                            |
| 12 |                                      |      |           |                                                                                                                     |                                                                                                                |                      |                                                                                                                                                                                                                                                                                                                                         |                                                                                                                            |
| 13 |                                      |      |           |                                                                                                                     |                                                                                                                |                      |                                                                                                                                                                                                                                                                                                                                         |                                                                                                                            |
| 14 |                                      |      |           |                                                                                                                     |                                                                                                                |                      |                                                                                                                                                                                                                                                                                                                                         |                                                                                                                            |
| 15 | Kerrigan V., et al.                  | 2020 | Australia | Full day (7 hours) workshop                                                                                         | Didactic lecture; interactive group discussions, reflections, and experiential exercises                       | Clinical             | Cultural knowledge, spirituality, and beliefs; past policies and practices; professional practice issues; oppressive and racist policies, colonization and white racial privilege; interpersonal communication skills                                                                                                                   | Hospital staff (n=621)                                                                                                     |
| 16 |                                      |      |           |                                                                                                                     |                                                                                                                |                      |                                                                                                                                                                                                                                                                                                                                         |                                                                                                                            |
| 17 |                                      |      |           |                                                                                                                     |                                                                                                                |                      |                                                                                                                                                                                                                                                                                                                                         |                                                                                                                            |
| 18 |                                      |      |           |                                                                                                                     |                                                                                                                |                      |                                                                                                                                                                                                                                                                                                                                         |                                                                                                                            |
| 19 |                                      |      |           |                                                                                                                     |                                                                                                                |                      |                                                                                                                                                                                                                                                                                                                                         |                                                                                                                            |
| 20 |                                      |      |           |                                                                                                                     |                                                                                                                |                      |                                                                                                                                                                                                                                                                                                                                         |                                                                                                                            |
| 21 |                                      |      |           |                                                                                                                     |                                                                                                                |                      |                                                                                                                                                                                                                                                                                                                                         |                                                                                                                            |
| 22 | Kerrigan V., et al.                  | 2022 | Australia | 7 x 18-20min podcasts (1/week)                                                                                      | Online podcasts; diary entries                                                                                 | Online               | Counterstories; interpersonal communication skills; social justice                                                                                                                                                                                                                                                                      | Physicians (n=16)                                                                                                          |
| 23 |                                      |      |           |                                                                                                                     |                                                                                                                |                      |                                                                                                                                                                                                                                                                                                                                         |                                                                                                                            |
| 24 |                                      |      |           |                                                                                                                     |                                                                                                                |                      |                                                                                                                                                                                                                                                                                                                                         |                                                                                                                            |
| 25 | Liaw S-T., et al.                    | 2015 | Australia | Half day workshop, case study toolkit, and cultural mentors                                                         | Workshop; cultural mentor; self-learning tools                                                                 | Clinical             | Interpersonal communication skills; cultural respect                                                                                                                                                                                                                                                                                    | Clinical practice - solo physician/groups (n=10)                                                                           |
| 26 |                                      |      |           |                                                                                                                     |                                                                                                                |                      |                                                                                                                                                                                                                                                                                                                                         |                                                                                                                            |
| 27 |                                      |      |           |                                                                                                                     |                                                                                                                |                      |                                                                                                                                                                                                                                                                                                                                         |                                                                                                                            |
| 28 | Liaw S-T., et al.                    | 2019 | Australia | Half day workshop, case study toolkit, and cultural mentor                                                          | Workshop; cultural mentor; self-learning tools                                                                 | Clinical             | Interpersonal communication skills; cultural respect                                                                                                                                                                                                                                                                                    | General practice clinics (n=56); general practitioner physicians (n=334); practice managers (n=56); practice nurses (n=93) |
| 29 |                                      |      |           |                                                                                                                     |                                                                                                                |                      |                                                                                                                                                                                                                                                                                                                                         |                                                                                                                            |
| 30 |                                      |      |           |                                                                                                                     |                                                                                                                |                      |                                                                                                                                                                                                                                                                                                                                         |                                                                                                                            |
| 31 |                                      |      |           |                                                                                                                     |                                                                                                                |                      |                                                                                                                                                                                                                                                                                                                                         |                                                                                                                            |
| 32 | Sauvé A., Cappelletti A., & Murji L. | 2022 | Canada    | Half-day in-person simulation workshop                                                                              | Simulation training                                                                                            | Clinical             | Determinants of Indigenous health; professional practice issues; oppressive and racist policies, colonization and white racial privilege                                                                                                                                                                                                | Physicians (Family Medicine Residents) (n=29)                                                                              |
| 33 |                                      |      |           |                                                                                                                     |                                                                                                                |                      |                                                                                                                                                                                                                                                                                                                                         |                                                                                                                            |
| 34 |                                      |      |           |                                                                                                                     |                                                                                                                |                      |                                                                                                                                                                                                                                                                                                                                         |                                                                                                                            |
| 35 |                                      |      |           |                                                                                                                     |                                                                                                                |                      |                                                                                                                                                                                                                                                                                                                                         |                                                                                                                            |
| 36 |                                      |      |           |                                                                                                                     |                                                                                                                |                      |                                                                                                                                                                                                                                                                                                                                         |                                                                                                                            |
| 37 | Wheeler A., et al.                   | 2021 | Australia | 1.5 hour online module, and a full day in-person workshop (2-3 weeks later)                                         | Online module(s); interactive group discussions, reflections, and experiential exercises; personal reflections | Online and classroom | Health disparities; professional practice issues; interpersonal communication skills                                                                                                                                                                                                                                                    | Pharmacists (n=39)                                                                                                         |
| 38 |                                      |      |           |                                                                                                                     |                                                                                                                |                      |                                                                                                                                                                                                                                                                                                                                         |                                                                                                                            |
| 39 |                                      |      |           |                                                                                                                     |                                                                                                                |                      |                                                                                                                                                                                                                                                                                                                                         |                                                                                                                            |
| 40 |                                      |      |           |                                                                                                                     |                                                                                                                |                      |                                                                                                                                                                                                                                                                                                                                         |                                                                                                                            |
| 41 |                                      |      |           |                                                                                                                     |                                                                                                                |                      |                                                                                                                                                                                                                                                                                                                                         |                                                                                                                            |
| 42 |                                      |      |           |                                                                                                                     |                                                                                                                |                      |                                                                                                                                                                                                                                                                                                                                         |                                                                                                                            |
| 43 |                                      |      |           |                                                                                                                     |                                                                                                                |                      |                                                                                                                                                                                                                                                                                                                                         |                                                                                                                            |
| 44 |                                      |      |           |                                                                                                                     |                                                                                                                |                      |                                                                                                                                                                                                                                                                                                                                         |                                                                                                                            |
| 45 |                                      |      |           |                                                                                                                     |                                                                                                                |                      |                                                                                                                                                                                                                                                                                                                                         |                                                                                                                            |
| 46 |                                      |      |           |                                                                                                                     |                                                                                                                |                      |                                                                                                                                                                                                                                                                                                                                         |                                                                                                                            |
| 47 |                                      |      |           |                                                                                                                     |                                                                                                                |                      |                                                                                                                                                                                                                                                                                                                                         |                                                                                                                            |

**Table 2. Summary of Evaluation and Outcomes**

| Citation                                 | Study design                       | Method                                                                                                                                  | Tool(s)                                                                                                                                 | Reported Outcome(s)                                                                                                                                                    |
|------------------------------------------|------------------------------------|-----------------------------------------------------------------------------------------------------------------------------------------|-----------------------------------------------------------------------------------------------------------------------------------------|------------------------------------------------------------------------------------------------------------------------------------------------------------------------|
| Barajas J. 2021.                         | Mixed methods, quality improvement | Post-survey                                                                                                                             | 7 dichotomous (yes/no); 2 open-ended questions                                                                                          | Positive impact on insights, knowledge, and anticipated behaviour change.                                                                                              |
| Barnabe C., et al. 2021.                 | Mixed methods                      | Pre- (1 week pre-intervention) and post-survey (3 months post-intervention). Satisfaction survey (1 week post-intervention)             | Social Cultural Confidence in Care Scale (SCCCS); free-text questions; Experience survey                                                | Significant change in knowledge, skills, and approach to social and cultural factors. Intervention was reported as being relevant and meeting expectations.            |
| Brewer K., McCann C., & Harwood M. 2020. | Qualitative longitudinal           | Post-survey. Follow-up interview (6 months post-intervention)                                                                           | Course feedback; structured interviews                                                                                                  | Major themes of "putting it into practice" and "keeping it at the forefront."                                                                                          |
| Chapman R., Martin C., & Smith T. 2014.  | Quantitative                       | Pre- and post-survey                                                                                                                    | Area human resources development/population health survey of participation in Aboriginal awareness training workshop                    | Some change of perceptions towards ATSI people. Small effect on familiarity. No effect on attitudes.                                                                   |
| Crowshoe L., et al. 2018.                | Mixed methods                      | Pre- (1 week pre-intervention) and post-survey (3 months post-intervention). Participant observations. Intervention satisfaction survey | Onsite satisfaction evaluation; observations of participant engagement with content on day; online survey                               | Significant improvement in knowledge, skills, awareness, confidence, and approach to patient care. Strong agreement that the workshop met objectives and expectations. |
| Hinton R., et al. 2014.                  | Mixed methods, action-oriented     | File audit                                                                                                                              | 2009 vs. 2011 audit of inpatient files                                                                                                  | Some improvements to the quality of recovery-oriented care, as shown through an increase in recording client social history, family issues, and cultural factors.      |
| Hulko W., et al. 2021.                   | Mixed methods, community-based     | Pre- and post -surveys, knowledge quizzes, and case study care planning. Talking Circles.                                               | Approaches to Dementia Questionnaire; Indigenous Cultural Competency Knowledge Quiz; care plans for "Alice;" Talking Circle transcripts | Improvement in the knowledge, skills, and values of the nurse participants. Storytelling sessions were reported as being effective at building capacity.               |



1  
2  
3  
4  
5  
6  
7  
8  
9  
10  
11  
12  
13  
14  
15  
16  
17  
18  
19  
20  
21  
22  
23  
24  
25  
26  
27  
28  
29  
30  
31  
32  
33  
34  
35  
36  
37  
38  
39  
40  
41  
42  
43  
44  
45  
46  
47

|                                            |                                   |                                                                                                          |                                                                                                                                                                 |                                                                                                                                                                                                                                                                     |
|--------------------------------------------|-----------------------------------|----------------------------------------------------------------------------------------------------------|-----------------------------------------------------------------------------------------------------------------------------------------------------------------|---------------------------------------------------------------------------------------------------------------------------------------------------------------------------------------------------------------------------------------------------------------------|
| Kerrigan V., et al. 2020.                  | Mixed methods                     | Post-survey                                                                                              | Likert-scale questions on Quality of Training; free-text questions                                                                                              | Provided good to excellent information provided on all topics. Participants wanted further and more specific cultural education opportunities.                                                                                                                      |
| Kerrigan V., et al. 2022.                  | Qualitative, participatory action | Qualitative journal entries. Post-intervention interviews                                                | Weekly reflections; feedback interviews                                                                                                                         | Raised the critical consciousness of participants leading to self-reported attitudinal and behaviour change.                                                                                                                                                        |
| Liaw S-T., et al. 2015.                    | Mixed methods, pragmatic          | Pre- and post-surveys and patient file audits (6 months post-intervention). Post-intervention interviews | Cultural Quotient questionnaire; file audit of health checks and clinical risk factors managed; follow-up interviews with staff, cultural mentors, and patients | Clinical practices improved their readiness to provide culturally appropriate care. Individual clinic staff improved their cultural strategic thinking.                                                                                                             |
| Liaw S-T., et al. 2019.                    | Mixed methods, cluster RCT        | File audit. Pre- and post-survey (12 months post-intervention)                                           | Cultural Quotient questionnaire; audit of rates of healthcare claims and chronic disease risk factors.                                                          | No significant change in Indigenous health check rates or cultural quotient scores.                                                                                                                                                                                 |
| Sauvé A., Cappelletti A., & Murji L. 2022. | Quantitative                      | Pre- and post-survey                                                                                     | abridged Scale of Ethnocultural Empathy (aSEE)                                                                                                                  | Significant increase in empathy, knowledge of Indigenous SDOH, and motivation to engage with Indigenous patients in a culturally safe manner.                                                                                                                       |
| Wheeler A., et al. 2021.                   | Mixed methods                     | Pre- and post-survey. Training acceptability survey                                                      | Cultural Capability Measurement Tool (CCMT); additional adapted questions; acceptability survey                                                                 | Significant improvement in cultural capability, confidence, and skills. Significant change in motivation to improve health outcomes for Indigenous patients and reduce barriers. Acceptability of the intervention and perceived value-add to participant practice. |

view only

## 150 **Search strategy**

151 Consistent with the search methods outlined in the Cochrane Handbook for systematic  
152 reviews,(25) an Information Specialist (CZ) conducted database searches in Ovid  
153 Medline, Embase, PsycINFO, CINAHL, Cochrane Central Register of Controlled Trials,  
154 Cochrane Database of Systematic Reviews, Bibliography of Indigenous People in North  
155 America, Applied Social Sciences Index & Abstracts, ERIC (Education Resources  
156 Information Center), International Bibliography of the Social Sciences, ProQuest  
157 Dissertations & Theses Global, Sociological Abstracts, and Web of Science's Social  
158 Sciences Citation Index and Science Citation Index. Search strategies were adapted for  
159 each database and used a comprehensive combination of subject headings and  
160 keywords for the concepts of Indigenous people, cultural competence and health  
161 professionals' education. Databases were searched for English language records from  
162 2006 to May 12, 2022 (based upon the emergence of literature describing and evaluating  
163 Indigenous cultural safety interventions) and uploaded into Colandr.(26) The reference  
164 lists of seminal texts and review articles were then reviewed for additional records. An  
165 additional 3 articles were identified for study inclusion. For the detailed search strategies  
166 see Supplementary Figure 2.

## 168 **Study screening**

169 Two independent reviewers screened all title and abstracts for full text review using the  
170 following inclusion criteria:

1  
2  
3  
4 171 (1) Study specific to Indigenous contexts in what is now known as Australia, Canada,  
5  
6 172 New Zealand, and/or the United States of America;

7  
8  
9 173 (2) Study describes educational interventions (workshops, training, coursework,  
10  
11 174 community visits, etc.) designed/implemented to improve cultural safety, cultural  
12  
13  
14 175 competency, and/or cultural awareness;

15  
16  
17 176 (3) Educational intervention focused on a majority of non-Indigenous adult participants  
18  
19 177 health care professionals who provide services (e.g., health or social services) to  
20  
21  
22 178 Indigenous peoples.

23  
24 179  
25  
26  
27 180 Full texts were obtained for all studies that passed this title and abstract screening stage  
28  
29  
30 181 and in the event that there was not enough information in the abstract to determine  
31  
32 182 inclusion according to these 3 criteria.

33  
34  
35 183  
36  
37 184 Three researchers collaborated on full-text screening and further eliminated articles that  
38  
39  
40 185 upon full reading, did not meet the primary inclusion criteria and two secondary inclusion  
41  
42  
43 186 criteria: (i) detailed information about the educational intervention's design and  
44  
45 187 implementation; (ii) defined evaluation outcomes. As per our inclusion criteria, we  
46  
47  
48 188 excluded studies in which the majority of the learners were Indigenous and/or the focus  
49  
50  
51 189 of the intervention was at the organizational versus health care provider level. We  
52  
53 190 additionally excluded train-the-trainer interventions in which the participants were not

1  
2  
3  
4 191 directly providing health services. Our two phased screening protocol is available as  
5  
6 192 Supplementary File 1.  
7

8  
9 193

## 10 11 194 **Data Abstraction and Quality Appraisal**

12  
13  
14 195 Three researchers collaborated on data abstraction across the following categories:  
15  
16 196 study methods (design, evaluation methods and tools, participants,  
17  
18  
19 197 sampling/recruitment), study population, sampling and recruitment methods, educational  
20  
21  
22 198 intervention design (pedagogy, content, modifications) and outcomes (individual and  
23  
24  
25 199 system level).  
26

27 200 Two independent reviewers completed preliminary data abstraction and the lead author  
28  
29  
30 201 (BJH) subsequently reviewed all abstractions and finalized Tables 1-4. The lead and  
31  
32  
33 202 senior authors (BJH, JS) independently appraised methodological quality using a tailored  
34  
35 203 version of the Well Living House quality appraisal tool (WLHQAT)(27-29) (Supplementary  
36  
37  
38 204 Figure 3) and subsequently met to discuss and reach consensus on scores (Table 3).  
39  
40 205 WLHQAT includes three equally weighted assessment domains: local Indigenous  
41  
42  
43 206 community relevance of methods; rigor and validity; and strength of evidence and has a  
44  
45  
46 207 maximum total score of 12. Studies with a total score of <7 were not included in the full  
47  
48  
49 208 synthesis. The interdisciplinary nature of included studies added complexity to the quality  
50  
51  
52 209 appraisal, in that the research team, study design, concepts and priorities, data collection,  
53  
54  
55 210 and measures were wide-ranging.  
56

57  
58  
59  
60 211

212

213

214

**Table 3: Well Living House Quality Appraisal Scores**

| Citation                                   | Scoring Range<br>1-3 / 4-6 / 7-9 / 10-12 |
|--------------------------------------------|------------------------------------------|
| Barajas J. 2021                            | 7-9                                      |
| Barnabe C., et al. 2021.                   | 7-9                                      |
| Brewer K., McCann C., & Harwood M. 2020.   | 7-9                                      |
| Chapman R., Martin C., & Smith T. 2014.    | 7-9                                      |
| Crowshoe L., et al., 2018.                 | 7-9                                      |
| Delbridge R., et al., 2018                 | 4-6                                      |
| Durey A., et al., 2017                     | 4-6                                      |
| Hinton R., et al. 2014.                    | 7-9                                      |
| Hulko W., et al. 2021.                     | 7-9                                      |
| Kerrigan V., et al., 2020.                 | 7-9                                      |
| Kerrigan V., et al., 2022.                 | 7-9                                      |
| Liaw S-T., et al. 2015.                    | 10-12                                    |
| Liaw S-T., et al. 2019.                    | 10-12                                    |
| McMichael B., et al., 2019                 | 4-6                                      |
| Sauvé A., Cappelletti A., & Murji L. 2022. | 7-9                                      |
| Wheeler A., et al. 2021.                   | 7-9                                      |

215

**Table 4 : Summary of Indigenous Involvement in Curriculum Development, Curriculum Delivery and Evaluation/Research Activities**

| Citation                                   | Study Design | Curriculum Development | Curriculum Delivery | Curriculum Evaluation | Study Analysis | Dissemination | Positionality |
|--------------------------------------------|--------------|------------------------|---------------------|-----------------------|----------------|---------------|---------------|
| Barajas J. 2021.                           | Yes          | Yes                    | None listed         | Yes                   | Yes            | Yes           | Yes           |
| Barnabe C., et al. 2021.                   | Yes          | Yes                    | Yes                 | Yes                   | Yes            | Yes           | Yes           |
| Brewer K., McCann C., & Harwood M. 2020.   | None listed  | Yes                    | None listed         | None listed           | None listed    | Yes           | None listed   |
| Chapman R., Martin C., & Smith T. 2014.    | None listed  | None listed            | Yes                 | None listed           | None listed    | None listed   | None listed   |
| Crowshoe L., et al., 2018.                 | Yes          | Yes                    | Yes                 | Yes                   | Yes            | Yes           | Limited       |
| Hinton R., et al. 2014.                    | None listed  | None listed            | None listed         | None listed           | None listed    | None listed   | None listed   |
| Hulko W., et al. 2021.                     | Yes          | Yes                    | Yes                 | Yes                   | Yes            | Yes           | Yes           |
| Kerrigan V., et al., 2020.                 | Yes          | Yes                    | Yes                 | Yes                   | Yes            | Yes           | Yes           |
| Kerrigan V., et al., 2022.                 | Yes          | Yes                    | Yes                 | Yes                   | Yes            | Yes           | Yes           |
| Liaw S-T., et al. 2015.                    | None listed  | Yes                    | Limited             | Yes                   | None listed    | None listed   | None listed   |
| Liaw S-T., et al. 2019.                    | None listed  | Yes                    | Limited             | Yes                   | None listed    | None listed   | None listed   |
| Sauvé A., Cappelletti A., & Murji L. 2022. | Yes          | Yes                    | Yes                 | None listed           | None listed    | None listed   | None listed   |
| Wheeler A., et al. 2021.                   | Yes          | Yes                    | Yes                 | Yes                   | None listed    | None listed   | None listed   |

217

218 **Synthesis**

219 We applied an iterative narrative approach to our synthesis.(30) This method was a good  
220 fit with the heterogeneity of study designs and outcomes and our secondary aim to  
221 understand which specific training approaches were impactful for whom and in what  
222 ways. In addition to our primary aim of identifying, summarizing, and assessing the  
223 design and outcomes of existing published evaluations of Indigenous cultural safety  
224 education programming for health care professionals, we were particularly interested in  
225 documenting underlying pedagogies, instructional strategies, formats, and content and  
226 how these might be related to program success across participant groups and contexts.  
227 We were also interested in the involvement of Indigenous instructors and Indigenous  
228 communities and how this might have contributed to program success.

229

230 The lead author led the synthesis of study design, participants, quality, and outcomes,  
231 drawing on data abstraction and with regular input from the other authors. Refinement of  
232 secondary narratives regarding (i) the role of underlying pedagogies and (ii) Indigenous  
233 instructor and community involvement was achieved through iterative discussion of  
234 independently identified themes among the authorship team followed by in depth re-  
235 examination of the included studies by the first author.

236

1  
2  
3  
4 237 Throughout the analysis, we applied a critical decolonizing lens where we intentionally  
5  
6 238 centered the distinct and diverse knowledges and strengths present in Indigenous  
7  
8  
9 239 communities' practices of health and wellbeing.(31-34) The authors sought to  
10  
11 240 acknowledge and critique the systemic power dynamics that so often inform existing  
12  
13  
14 241 health program evaluation models, particularly when applied to oppressed populations,  
15  
16 242 including Indigenous peoples in what is now known as Australia, Canada, New Zealand  
17  
18  
19 243 and the United States. In so doing, we drew upon the foundational Indigenous principles  
20  
21  
22 244 of relationships, reciprocity, responsibility, respect, and relevance (known as the 5  
23  
24 245 R's),(35-36) and applied our decolonizing approach to our consideration and analysis of  
25  
26  
27 246 the inclusion (or lack thereof) of Indigenous knowledges and practices in the evaluation  
28  
29  
30 247 of identified studies. Research that looks to learn about Indigenous experiences of health  
31  
32 248 programs and policies requires acknowledging the unique and distinct relations and  
33  
34  
35 249 interconnections held by Indigenous peoples that are so often decontextualized through  
36  
37  
38 250 the application of Western methodologies.(27) In keeping with our decolonizing  
39  
40 251 approach, it is important for us to self-locate the authorship team as comprised of two  
41  
42  
43 252 Indigenous women (JS, DS), one racialized settler ally (BJH), and two non-racialized  
44  
45 253 settler allies (SF, CZ).

254

## 255 **Patient and Public Involvement**

256 We did not involve patients or the public in the design, or conduct, or reporting, or  
257 dissemination plans of our research.



258

## 259 RESULTS

### 260 Literature search

261 The literature search strategy resulted in 2,442 citations (following removal of any  
262 duplicates), from which 2,250 were deemed ineligible based on title and abstract  
263 screening. 192 articles were selected for full text review from which 176 were excluded  
264 based on the primary inclusion criteria (n=147) or secondary inclusion criteria (n=29).  
265 (Supplementary Figure 1) We were left with 16 unique studies that described and  
266 evaluated Indigenous cultural safety training for health professionals and were deemed  
267 eligible for full synthesis inclusion.(37-52) (Table 3)

268

### 269 Quality Appraisal

270 Among the 16 studies that were included, 3 scored <7 on the WLHQAT.(42, 43, 50) (Table  
271 3) These studies were excluded from the synthesis. Lower scores reflected a combination  
272 of the following: limited, to no involvement of Indigenous community partners in the  
273 evaluation; inadequate sample size and/or lack of participant uptake and/or retention in  
274 the evaluation; and/or weak evaluation study design.(43,50) For instance, a low score  
275 could reflect that Indigenous scholars or community members were involved in the design  
276 and/or delivery of the training program but not in the design and/or implementation of the  
277 evaluation. Another study did not triangulate their qualitative study results.(42)

1  
2  
3  
4 2785  
6 279 **Study and population characteristics**

7  
8  
9 280 The 13 analyzed studies were published between 2014 – 2022. The majority (n=7) were  
10  
11 281 conducted in Australia.(40, 44, 46-49, 52) A smaller number (n=4) took place in  
12  
13  
14 282 Canada.(38, 41, 45, 51) Of the last two studies, one (n=1) was conducted in the United  
15  
16 283 States (US)(37) and the other (n=1) was conducted in New Zealand (n=1).(39)

17  
18  
19 284

20  
21  
22 285 Evaluation design varied widely. Nine of the studies (n = 9) applied mixed methods (37-  
23  
24 286 38, 41,44-46, 48-49, 52) including various combinations of surveys, open ended  
25  
26  
27 287 questions, semi-structured interviews, and talking circles. One of these was a  
28  
29  
30 288 randomized trial that incorporated a participatory action research approach, in which the  
31  
32 289 research team cooperated with the communities, supporting institutions and  
33  
34  
35 290 participants.(49) Two (n=2) studies were qualitative.(39,47) Another two (n=2) were  
36  
37  
38 291 quantitative.(40,51) Eight studies (n=8) incorporated pre/post intervention surveys.(38,  
39  
40 292 40-41, 45, 48-49, 51-52) Six of the studies (n=6) incorporated some measure of longer-  
41  
42  
43 293 term impact as part of the evaluation with varied follow-up periods: across 3 years(44);  
44  
45 294 12 months(49); 6 months(39,48); and 3 months.(38,41) The remainder of the studies  
46  
47  
48 295 (n=7) collected post intervention data immediately following the intervention. One  
49  
50  
51 296 intervention was described and evaluated across multiple publications as part of a larger  
52  
53 297 research program.(48-49) Most (n=10) but not all of the studies, provided access to-  
54  
55  
56 298 and/or a detailed description of their evaluation tools.(37-41, 44, 48-49, 51-52) Of the

1  
2  
3  
4 299 eleven studies that used survey tools, eight employed previously validated evaluation  
5  
6 300 tools,(38, 40-41, 45, 48-49, 51-52) two of these, although validated, were adapted by the  
7  
8  
9 301 research team.(41,51)

10  
11 302  
12  
13  
14 303 Sample sizes varied widely, ranging from 6 to 621, and studies took place in various  
15  
16 304 settings. The majority (n=8) occurred in clinical settings and the remainder were either  
17  
18  
19 305 online (n=3) or a mix of online and in a classroom (n=2). Three of the studies (n=3)  
20  
21  
22 306 recruited specialized practitioners: rheumatologists(38), pharmacists(52), and speech  
23  
24 307 language therapists(39). One study recruited only family medicine residents(51) whereas  
25  
26  
27 308 another focussed on nurses.(45) Four of the studies (n=4) delivered interventions tailored  
28  
29  
30 309 to providers serving a specific health service user population: arthritis(38), psychiatric  
31  
32 310 care and mental health(44); residential care(45), and Māori adults with aphasia.(39)

33  
34  
35 311  
36  
37 312 **Reported Impacts of Indigenous Cultural Safety Education or Training**  
38  
39  
40 313 Study outcomes were almost exclusively learner focused (n=10) and included learner  
41  
42  
43 314 self-reports regarding: quality of the learning experience; changes in knowledge or  
44  
45 315 awareness; shifts in beliefs; attitudes regarding Indigenous peoples and their care  
46  
47  
48 316 experiences; and/or confidence and skill to care for Indigenous peoples.(37-41,45-47,51-  
49  
50  
51 317 52) (Table 2) A subset of learner focused studies (n=4) included measures of self-  
52  
53 318 reported changes in practice.(38-39, 45, 47) These impacts were assessed using proxy  
54  
55  
56 319 measures of clinical behaviour including post-intervention interviews with

1  
2  
3  
4 320 learners,(39,47) or through the use of scenarios(38) or vignette-based care plans.(45)  
5  
6 321 Although many of the studies reported significant changes in participants' attitudes,  
7  
8  
9 322 knowledge and awareness, these findings were tempered by limitations in study design  
10  
11 323 and implementation, such as self-selection bias,(38-40, 45-47, 51-52) small sample size,  
12  
13  
14 324 low uptake and retention,(37-39, 41, 47, 51-52) the lack of randomization and/or controls  
15  
16 325 (all, except for(49)) and potential social desirability response bias.(39) Conclusions  
17  
18  
19 326 regarding sustained impact over time, were limited by a paucity of studies (n=6) that  
20  
21  
22 327 included longitudinal measurements.(38-39, 41, 44, 48-49)  
23  
24  
25 328  
26  
27 329 Few studies reported on clinical outcomes, and most were based on self-assessments  
28  
29  
30 330 (n=4) as described above.(38-39, 45, 47) Three studies described externally-assessed,  
31  
32  
33 331 patient-based practice outcomes through the use of file audits(44, 48-49) and qualitative  
34  
35 332 interviews with patients at the participating clinics.(48) Of note, the one study that  
36  
37  
38 333 included a randomized control and externally assessed, patient-based practice outcomes  
39  
40 334 did not demonstrate any significant intervention impact.(49)  
41  
42  
43 335  
44  
45 336 Terminology varied widely across the studies, a phenomenon that has already been  
46  
47  
48 337 described elsewhere by Curtis et al(53) as negatively impacting the quality of the  
49  
50  
51 338 evaluations and the ability to draw evidence-based comparisons. Some studies referred  
52  
53 339 to cultural safety(37, 39, 45, 47) while others used terms such as: cultural awareness,(46)  
54  
55  
56 340 cultural security,(44) cultural respect,(48-49) cultural competency(39-41), cultural  
57  
58  
59  
60

1  
2  
3  
4 341 humility,(38) cross-cultural education and cultural capability,(52) and intercultural  
5  
6 342 empathy.(51) A few studies relied upon proxy measures to assess cultural safety. For  
7  
8  
9 343 example, Crowshoe et al(41) described an increase in learners' "confidence" as a proxy  
10  
11 344 for cultural safety. Kerrigan et al(46) focused on behaviour change and self-reported  
12  
13  
14 345 aspiration as indicative of positive clinical outcomes, and noted that although "it was  
15  
16 346 impossible to assess" whether their intervention shifted behaviour, they could "surmise  
17  
18  
19 347 that health professionals aspire to transfer learning to the workplace."((46) p7) Similarly,  
20  
21  
22 348 in a later paper, Kerrigan and colleagues(47) suggested, based upon post intervention  
23  
24 349 interviews with learners, that "[D]octors changed behaviour in relation to building rapport  
25  
26  
27 350 with patients, asking patients questions, working with Aboriginal interpreters, gaining  
28  
29  
30 351 informed consent."(p13) In conclusion they noted that there is "still a need to assess if  
31  
32 352 training improves patient experience and outcomes"(p14) to determine whether the  
33  
34  
35 353 intervention improved cultural safety.(47) A few authors reflected on the overall  
36  
37  
38 354 limitations of their findings, suggesting that they were not generalizable and/or that  
39  
40 355 additional research is required.(37, 45-46, 51) Hulko and colleagues(45) indicated that  
41  
42  
43 356 their intervention and evaluation was based upon Secwepemc ways of knowing and being  
44  
45  
46 357 and doing and as such could not be scaled up whereas Barajas(37) acknowledged the  
47  
48 358 value of specificity and context and warned against developing and implementing training  
49  
50  
51 359 programs through a pan-Indigenous approach.

360

## 361 Training approaches and methods

1  
2  
3  
4 362 Theoretical frameworks and pedagogical approaches were manifold. Studies referenced  
5  
6 363 transformative learning theories(38, 47, 51); social-constructivist frameworks (44);  
7  
8  
9 364 diffusion of innovation theory(37); a public health framework(39); and, Educating for  
10  
11 365 Equity (E4E)(38, 41). Liaw et al(48-49) describe a trans-theoretical approach in which  
12  
13  
14 366 they harmonised cultural intelligence frameworks, developments in cultural respect,  
15  
16 367 safety and competence and a review of successful Aboriginal programs alongside  
17  
18  
19 368 consultation with Aboriginal communities and others. Others (n=4) designed their  
20  
21  
22 369 program with cultural safety and decolonizing philosophies at their core.(39-40, 46-47)  
23  
24  
25 370 For example, Kerrigan et al(46) place the responsibility for change on the “hegemonic  
26  
27 371 individuals and institutions.”((46) p3) Only one paper explicitly cited critical race  
28  
29  
30 372 theory(47) as a core component. A limited number (n=3) did not cite a conceptual theory  
31  
32  
33 373 or framework and instead reviewed cultural safety, competency and awareness in health  
34  
35 374 care training and the possible benefits related to training programs.(40, 45, 52) Lastly,  
36  
37  
38 375 some of the training programs applied participatory action approaches or community-  
39  
40 376 based approaches to the development and delivery of the training.(44-45, 47-49)  
41  
42  
43 377  
44  
45 378 Participation for all programs was voluntary. Overall, there were similarities in course  
46  
47  
48 379 content across programs. Training delivery modalities varied and included combinations  
49  
50  
51 380 of online modules, didactic lectures, interactive group discussions, workshops,  
52  
53 381 simulations, and reflections. (Table 1) Only one was delivered as a series of online  
54  
55  
56 382 podcasts (n=1), an approach which was well-received by learners.(47) Although some in-

1  
2  
3  
4 383 person trainings (n=3) were delivered by non-Indigenous instructors,(44, 48-49) most  
5  
6 384 (n=7) were co-delivered/facilitated by a mix of Indigenous and non-Indigenous  
7  
8  
9 385 facilitators(38, 41, 45, 51) or delivered only by Indigenous facilitator(s)/instructor(s) (Table  
10  
11 386 4).(40, 46, 52) Some of the more innovative approaches incorporated story-telling and  
12  
13  
14 387 talking circles with Elders(45); podcasts developed and voiced by Elders(47); and,  
15  
16 388 simulation training facilitated with Indigenous community members.(51) Liaw et al.(48-49)  
17  
18  
19 389 delivered an integrative program, Ways of Thinking, Ways of Doing, which in addition to  
20  
21  
22 390 a short workshop, participants were also provided with a case study reference toolkit and  
23  
24 391 a cultural mentor.

25  
26  
27 392  
28  
29 393 With one exception,(49) all of the training programs reported some level of impact, though  
30  
31  
32 394 only a few of the authors linked the observed impact to their training approaches and  
33  
34  
35 395 methods. Some directly attributed action-oriented(44, 48-49) and community-based(37,  
36  
37 396 45, 51) approaches to the impact of the interventions. However, the same authors also  
38  
39  
40 397 noted that the participatory components to the learning materials were not incorporated  
41  
42  
43 398 consistently (e.g. AIMhi care plans and engagement of Aboriginal Mental Health  
44  
45 399 Workers(44) and cultural mentors(49)). Crowshoe et al(41) suggested that the impact of  
46  
47  
48 400 their training program was related to “interactive educational techniques and intentional  
49  
50  
51 401 facilitation strategies”(p54) including a combination of Indigenous and non-Indigenous  
52  
53 402 facilitators. Notably, this study had a high drop-out rate with less than half of the registered  
54  
55  
56 403 learners completing the post-survey.(41) Chapman and colleagues,(40) who applied a

1  
2  
3  
4 404 multi-modal training delivered by an Indigenous trainer, described how the impact of their  
5  
6 405 training program was limited to significant changes in learners' perceptions whereas  
7  
8  
9 406 learners' attitudes remained unchanged. Kerrigan and colleagues(47) claimed their  
10  
11 407 online Elder podcast changed both learner attitudes and behaviours among a small,  
12  
13  
14 408 convenience sample of 14 learners, based on the analysis of semi-structured interviews  
15  
16  
17 409 post-intervention.

18  
19 410

### 20 21 22 411 **Indigenous community understandings of measures of success**

23  
24 412 Indigenous cultural safety can only truly be assessed through the lens of Indigenous  
25  
26  
27 413 patients and communities who ultimately are the recipients of clinical care.(54) It follows  
28  
29  
30 414 that Indigenous patient and community understandings and measures of success are  
31  
32 415 critical to assessing the impact of any Indigenous cultural safety training program.  
33  
34  
35 416 However, the degree of involvement of local Indigenous people and communities in the  
36  
37  
38 417 development, implementation, and evaluation of the educational interventions was limited  
39  
40 418 overall and differed across the studies. Table 4 (Summary of Indigenous Involvement in  
41  
42  
43 419 Curriculum Development, Curriculum Delivery and Research Activities) provides a  
44  
45  
46 420 summary overview. Six out of the thirteen peer reviewed papers included statements  
47  
48 421 describing the ethnic and/or Indigenous identity of the authors. Of these, half (n=3)  
49  
50  
51 422 covered the entire authorship(37, 45, 47) and the remainder (n=3) limited self-location to  
52  
53  
54 423 Indigenous co-authors.(38, 41, 46) For the most part, Indigenous individuals and/or  
55  
56 424 community members contributed to the development and delivery of the curriculum, either  
57  
58  
59



1  
2  
3  
4 425 as members of the research team or as local Indigenous community members engaged  
5  
6 426 through participatory and partnered approaches.  
7

8  
9 427  
10  
11 428 Contributions by local Indigenous communities to study evaluations, were far more  
12  
13  
14 429 limited, and rarely drew upon health care delivery and/or patient experience. Some  
15  
16  
17 430 established partnerships with Indigenous run organizations(48-49) whereas others relied  
18  
19 431 upon survey tools that were developed in partnership with Indigenous advisors and  
20  
21  
22 432 communities,(40, 52) however, these were not always locally informed. Others involved  
23  
24 433 Indigenous Elders in the evaluation process.(45, 47) In these examples, the Elders were  
25  
26  
27 434 involved in both the development and the evaluation of the curriculum. Lastly, only one  
28  
29  
30 435 evaluation focused on health care delivery and/or patient experience and included  
31  
32 436 interviews with Indigenous patients and cultural mentors.(48)  
33  
34

35 437

## 36 37 438 **DISCUSSION**

38  
39  
40 439 The rapid growth of Indigenous cultural safety training for health care professionals is  
41  
42  
43 440 linked to a global movement to interrupt Indigenous/non-Indigenous health inequities,  
44  
45  
46 441 which are rooted in persistent colonial attitudes and systems, including anti-Indigenous  
47  
48 442 stereotyping and racism.(15) The majority of the papers included here provide a rich  
49  
50  
51 443 description of Indigenous cultural safety training program approaches, content, and  
52  
53 444 implementation. In contrast, analysis and synthesis of the accompanying evaluations of  
54  
55  
56  
57  
58  
59

1  
2  
3  
4 445 these same training programs revealed clear and cross-cutting gaps in the demonstration  
5  
6 446 of clinical and/or system level impacts, even though these are commonly referenced as  
7  
8  
9 447 desired outcomes. The majority of evaluations were limited in focus to learner  
10  
11 448 experiences and self-reported practice outcomes. For example, Kerrigan and  
12  
13  
14 449 colleagues(47); Brewer and colleagues(39) and Barajas(37) all suggested, through their  
15  
16 450 evaluations, that the training programs resulted in changes in self-reported behaviour and  
17  
18  
19 451 as such, intention and practice. These outcomes however, are subject to self-reporting  
20  
21  
22 452 response bias such as social desirability. While many of the studies were able to  
23  
24  
25 453 demonstrate some level of impact on knowledge and attitudes towards Indigenous  
26  
27 454 peoples by learners, none of these studies were able to establish an observable impact  
28  
29  
30 455 with respect to a shift towards more culturally safe and clinical practice guideline adherent  
31  
32 456 health care for Indigenous patients.  
33  
34

35 457

### 37 458 **Evidence of shifts in knowledge and attitudes; but evidence-base is limited**

39  
40 459 Self-reported shifts in knowledge and attitudes regarding Indigenous peoples did improve  
41  
42  
43 460 across most of the studies.(37-41, 45-47, 51-52) Although limited, two of the studies  
44  
45  
46 461 suggested that these shifts may be sustained over time.(38-39) However, when  
47  
48 462 considering the stated impact of these studies, it is also important to take into account the  
49  
50  
51 463 many limitations inherent in the study design. Evaluation studies relied upon voluntary  
52  
53  
54 464 self-selection. Sample sizes were generally small and those that were longitudinal  
55  
56 465 showed significant baseline to post-intervention loss to follow-up. Eight of the thirteen  
57  
58  
59

1  
2  
3  
4 466 evaluations involved pre-post assessments involving surveys and/or focus groups.(38,  
5  
6 467 40-41, 45, 48-49, 51-52) Only one of these included a control group.(49) In addition, only  
7  
8  
9 468 eight of the studies included validated quantitative surveys that employed scales.(38,40-  
10  
11 469 41, 45, 48-49, 51-52) As a result, the shifts in knowledge and attitudes can 'at best' be  
12  
13  
14 470 correlated with the described intervention and are limited by several biases arising from  
15  
16 471 the dynamics of course evaluation and marking, participant optimism and in some  
17  
18  
19 472 instances, the lack of anonymity as well as voluntary and low response rates. For the  
20  
21  
22 473 most part, when the described impact was an observable increase in knowledge or shift  
23  
24 474 in attitudes, studies also tended to focus on participant experience of the program. These  
25  
26  
27 475 measures highlight how participants expressed gratitude regarding what they learnt and  
28  
29  
30 476 spoke to how this might have improved their confidence in working with Indigenous  
31  
32 477 patients going forward. These shifts in confidence, although surely positive, cannot be  
33  
34  
35 478 interpreted as evidence of improved quality of care towards Indigenous patients in the  
36  
37 479 health care system.

38  
39  
40 480  
41  
42 481 **Very little evidence of patient focused impacts and no measures of systems-level impact**

43  
44  
45 482 Cultural safety by definition can only be determined and evaluated by the person receiving  
46  
47  
48 483 the care and their family,(54) yet only three of thirteen studies included tools designed to  
49  
50  
51 484 evaluate patient experience: a subset of patient interviews post intervention(48) and  
52  
53 485 pre/post file audits.(44, 49) Interestingly, Liaw and colleagues saw no impact, and  
54  
55  
56 486 concluded, that "the lack of effect of the intervention may be attributable to study design

1  
2  
3  
4 487 limitations, complex and indirect relationship between the intervention and the outcome  
5  
6 488 measures, or contextual factors that influenced the fidelity of the intervention at the  
7  
8  
9 489 Medicare Local/PHN level and its ability to achieve measurable changes in the target  
10  
11 490 behaviours."((49) p267) None of the studies attempted to measure adherence to clinical  
12  
13  
14 491 practice guidelines, a critical outcome measure which is typically associated with provider  
15  
16 492 training outcomes and could be evaluated through the use of standardized patients(56-  
17  
18  
19 493 58), ideally unannounced, or through file audits of clinical care.(59, 60) Kirkpatrick has  
20  
21  
22 494 argued that it is "difficult, if not impossible to evaluate the impact of training on an  
23  
24 495 organization due to an inability to separate the variables which could be attributed to other  
25  
26  
27 496 factors."((55)p59) In this study, we focused on interventions implemented at the level of  
28  
29  
30 497 the health care provider, however, the approach does not limit the evaluation to individual  
31  
32 498 level measures, as cultural safety training of health care providers can have  
33  
34  
35 499 organizational-level impacts. None of the studies evaluated systems-level changes that  
36  
37  
38 500 may have been associated with individual training. Understanding the networked effect  
39  
40 501 of how training participants subsequently influence their colleagues will be important  
41  
42  
43 502 going forward. Hulko and colleagues(45) noted that cultural safety research in general  
44  
45  
46 503 needs to advance tools that will measure these effects, and noted that organizational  
47  
48 504 change will require institutional supports and policy changes that encourage health care  
49  
50  
51 505 professionals to implement culturally safe practices.

52  
53 506

54  
55  
56 507 **Impactful specific training approaches, strategies, formats or content**

1  
2  
3  
4 508 The application of purposeful, evidence based, pedagogical theory and practices that  
5  
6 509 advance pre-requisite knowledge, self-awareness and skills is critical to the success of  
7  
8  
9 510 cultural safety training and education programs. A number of the reviewed studies  
10  
11 511 described how specific training approaches, formats or content may have contributed to  
12  
13  
14 512 impact, however, most of the authors were also careful to note the limitations of their  
15  
16 513 outcomes and the need for further research to clarify whether and if so, how, approach  
17  
18  
19 514 and content of the training program contributed to the outcomes. Some authors also  
20  
21  
22 515 described how variation between past and current evaluations of Indigenous cultural  
23  
24 516 safety, including conceptual frameworks, measurement tools and aims, resulted in an  
25  
26  
27 517 overall lack of consensus and limited the development of an evidence-base.(39, 46)  
28  
29  
30 518 Hinton et al(44) spoke to the value of a participatory action-oriented study design that  
31  
32 519 incorporated institutional leadership as change agents and clinical champions to  
33  
34  
35 520 encourage recruitment and uptake. This was further supported by Brewer et al.(39) who  
36  
37  
38 521 observed low uptake and argued that incentives, particularly over the longer term, were  
39  
40 522 not always effective and that to improve uptake, and consequently evaluation, training  
41  
42  
43 523 ought to be “compulsory or obligatory” and recommended organizational commitment and  
44  
45 524 team involvement. Implementing mandated training alongside appropriate evaluations  
46  
47  
48 525 using file audits, simulation and/or standardized patients will undoubtedly require training  
49  
50  
51 526 and evaluation protocols that address arising concerns of participant health care  
52  
53 527 professionals.  
54  
55  
56 528

1  
2  
3  
4 529 The evidence was limited as to whether or not inclusion of Indigenous people and  
5  
6 530 communities contributed to successful outcomes, although a number of the studies  
7  
8  
9 531 referenced various components, such as Indigenous vodcasts, guest speakers, cultural  
10  
11 532 mentors, and academic lecturers as key to the programs they evaluated. Liaw and  
12  
13  
14 533 colleagues concluded that the strength of their program may have been resultant from  
15  
16 534 the inclusion of cultural mentors who, when “working with practice staff in their own  
17  
18  
19 535 environment, were effective translators of cultural respect theory and knowledge, as  
20  
21 536 formalized in the toolkit and delivered by the workshop, into practice.”((48) p391) Hinton  
22  
23  
24 537 and colleagues(44) also made similar observations regarding cultural advisors, who were  
25  
26  
27 538 involved in the action oriented programming and group sessions.  
28  
29

30 539  
31  
32 540 We acknowledge that classic systematic review methods have been developed outside  
33  
34  
35 541 of Indigenous contexts, without explicit alignment to Indigenous worldviews, community  
36  
37 542 requirements, and methodologies. Our team of Indigenous and allied scientists and  
38  
39  
40 543 Indigenous health service leaders built upon existing tailored Indigenous systematic  
41  
42 544 review methodologies(27-29) to implement a method aimed at optimizing relevance for  
43  
44  
45 545 Indigenous peoples through: (1) co- design, co-leadership and co-authorship by leading  
46  
47  
48 546 Indigenous methods scholars and Indigenous cultural safety educators, ensuring that  
49  
50  
51 547 their expertise and knowledge was centred throughout the project; (2) direct involvement  
52  
53 548 of a senior Indigenous scholar and methodologist (JS) in all stages of the review, analysis  
54  
55  
56 549 and synthesis; (3) application of a data extraction tool developed in consultation with  
57  
58  
59

1  
2  
3  
4 550 Indigenous community partners: the Southern Ontario Aboriginal Health Access Centre  
5  
6 551 (SOAHAC) (Supplementary File 2) and the WLHQAT, a quality appraisal tool that was  
7  
8  
9 552 designed at an Indigenous-led research centre in partnership with Indigenous community  
10  
11 553 members.

12  
13  
14 554 The review is limited to ICS programs with evaluations that have been published in the  
15  
16 555 peer review and grey literature and as such, may not have captured the true breadth of  
17  
18  
19 556 existing Indigenous cultural safety training programs and related evaluations. To optimize  
20  
21  
22 557 feasibility and study coherence, we did not include organizational level interventions as  
23  
24 558 for this initial study. Instead, we limited our focus to interventions directed towards health  
25  
26  
27 559 care providers. We do recognize that it is likely that lasting system-level impacts will  
28  
29  
30 560 require interventions that are implemented and evaluated at both the individual and  
31  
32 561 organizational levels and would like to highlight the need for additional research focused  
33  
34  
35 562 on advancing and evaluating system-level interventions. Lastly, the review was  
36  
37  
38 563 conducted over a lengthy period of time due to the required extensive and iterative  
39  
40 564 consultation with community partners and Indigenous study team members in the  
41  
42  
43 565 development and implementation of the final protocol to ensure that we were centering  
44  
45 566 Indigenous worldviews, experiences, and community considerations.”

46  
47  
48 567

49  
50 568 **CONCLUDING REMARKS**  
51  
52  
53  
54  
55  
56  
57  
58  
59  
60

1  
2  
3  
4 569 Overall, there is a paucity of evidence linking existing Indigenous cultural safety training  
5  
6 570 interventions to enhancements in non-Indigenous health care professionals' knowledge,  
7  
8  
9 571 culturally safe engagement skills and clinical practice guideline adherence when caring  
10  
11 572 for Indigenous patients. As researchers and practitioners in this field, we note that these  
12  
13  
14 573 gaps in rigorous patient-outcome focused scholarship are rooted in systemic limitations  
15  
16 574 in the resources available to organizations leading this work to carry-out and disseminate  
17  
18  
19 575 comprehensive and cost-intensive evaluations. This systemic under-resourcing and the  
20  
21  
22 576 linked implementation of non-evidence based interventions is problematic, inconsistent  
23  
24 577 with the evidence standards required in other domains of clinical training, and is  
25  
26  
27 578 commonly associated with the same harmful anti-Indigenous, colonial policies and  
28  
29  
30 579 practices that training is designed to disrupt. Further research investment, with funds  
31  
32 580 directed towards Indigenous-led agencies and organizations that are leading the work in  
33  
34  
35 581 this field, is required to advance training program evaluation design, implementation,  
36  
37 582 analysis and dissemination to ensure that both the training programs and their evaluations  
38  
39  
40 583 meets the dual criteria of excellence in Indigenous health research: a) methodological  
41  
42 584 rigour and b) alignment with and connection to local, regional and /or national Indigenous  
43  
44  
45 585 priorities and needs.  
46  
47

48 586

## 50 587 **AUTHORS' CONTRIBUTIONS**

51  
52  
53  
54  
55  
56  
57  
58  
59  
60



1  
2  
3  
4 588 JS and DS conceptualized the systematic review. JS made significant contributions to the  
5  
6 589 interpretation of the data. CZ carried out the database literature searches. SF and BJH  
7  
8  
9 590 screened titles and carried out data extraction. BJH and JS carried out the initial analysis  
10  
11 591 and interpretation of the data and together, generated consensus with SF regarding key  
12  
13  
14 592 themes. DS commented on high level key themes. BJH, SF and JS drafted sections of  
15  
16 593 the manuscript and DS commented on the manuscript in progress. All authors contributed  
17  
18  
19 594 to study design and interpretation of findings, and approved the final manuscript.  
20  
21  
22 595

## 23 24 596 **COMPETING INTERESTS**

25  
26  
27 597 All authors have completed the ICMJE uniform disclosure form at  
28  
29  
30 598 [www.icmje.org/disclosure-of-interest/](http://www.icmje.org/disclosure-of-interest/). BJH, SF and CZ declare no competing interests. JS  
31  
32 599 has no significant competing interests. JS is a sibling of DS. JS and DS are both members  
33  
34  
35 600 of the Indigenous Cultural Safety Learning Series Advisory Circle in Canada, funded by  
36  
37  
38 601 San'yas and co-hosted by the Ontario Federation of Indigenous Friendship Centres. The  
39  
40  
41 602 Indigenous Cultural Safety Learning Series is a webinar series focused on Indigenous  
42  
43 603 cultural safety. It is guided by an Advisory Circle of Indigenous leaders from across  
44  
45  
46 604 Canada. DS was employed by the Southwest Ontario Aboriginal Health Access Centre  
47  
48 605 (SOAHAC) (one of the funding agencies), in the early stages of this review until March  
49  
50  
51 606 2020. DS is currently employed by San'yas Indigenous Cultural Safety Learning  
52  
53  
54 607 Programs, Indigenous Health, Provincial Health Services Authority as of September  
55  
56  
57  
58  
59  
60

1  
2  
3  
4 608 2020. They offer educational interventions and consultation services designed to uproot  
5  
6 609 anti-Indigenous racism and promote cultural safety for Indigenous people. One of the  
7  
8  
9 610 interventions studied included an early version of one of the online training programs  
10  
11 611 offered by San'yas. It was referred to as Indigenous Cultural Competency (ICC) and was  
12  
13  
14 612 applied as part of a larger intervention in one of the articles included in the systematic  
15  
16 613 review. This version was delivered prior to DS' employment with San'yas. The program  
17  
18  
19 614 is situated within a Provincial Health Services Authority (PHSA) in British Columbia,  
20  
21  
22 615 Canada and operated on a non-profit, cost recovery model through fees charged for the  
23  
24 616 training and with oversight by PHSA Indigenous Health Leadership. All of DS'  
25  
26  
27 617 compensation is subject to PHSA policies and DS is not permitted to receive any  
28  
29  
30 618 compensation or payments outside of salary and benefits. DS' contributions were limited  
31  
32 619 to the conceptual design of the study as well as high level commentary and feedback on  
33  
34  
35 620 high level thematic analyses and draft manuscripts. DS was blinded to the mention of ICC  
36  
37 621 (now San'yas) training materials in any discussions related to higher level thematic  
38  
39  
40 622 analysis.

41  
42  
43 623

## 44 45 624 **FUNDING**

46  
47  
48 625 Dr. Smylie is funded by a Tier 1 Canada Research Chair. This project was also supported  
49  
50  
51 626 by funding from the Southwest Ontario Aboriginal Health Access Centre (SOAHAC) and  
52  
53  
54 627 the St. Michael's Hospital Foundation.

628

## 629 DATA SHARING

630 Most of the data generated or analysed as well as the WLHQAT applied during this study  
631 are publicly available. Additional materials are available upon request from the  
632 corresponding author.

633

## 634 ETHICS APPROVAL AND CONSENT TO PARTICIPATE

635 Ethics approval and consent to participate were not required for this study.

636

637

## 638 REFERENCE LIST

- 639 1. Commission on Social Determinants of Health (CSDH). Social Determinants and  
640 Indigenous Health: The International Experience and Its Policy Implications.  
641 Adelaide: International Symposium on the Social Determinants of Indigenous  
642 Health. 2007 Apr [cited 2023 Jan 6]. 40 p. Available from:  
643 <https://nativehealthdatabase.net/node/17216>
- 644 2. Stephanovich O. Pope Francis apologizes to Indigenous delegates for “deplorable”  
645 abuses at residential schools. CBC News [Internet]. 2022 Apr 1 [cited 2023 Jan 6].  
646 Available from: [https://www.cbc.ca/news/politics/pope-francis-responds-indigenous-](https://www.cbc.ca/news/politics/pope-francis-responds-indigenous-delegations-final-meeting-1.6404344)  
647 [delegations-final-meeting-1.6404344](https://www.cbc.ca/news/politics/pope-francis-responds-indigenous-delegations-final-meeting-1.6404344)

- 1  
2  
3  
4 648 3. Yardely J, Neuman W. In Bolivia, Pope Francis Apologizes for Church's 'Grave  
5  
6 649 Sins'. New York Times [Internet]. 2015 Jul 9 [cited 2023 Jan 6]. Available from:  
7  
8  
9 650 [https://www.nytimes.com/2015/07/10/world/americas/pope-francis-bolivia-catholic-](https://www.nytimes.com/2015/07/10/world/americas/pope-francis-bolivia-catholic-church-apology.html)  
10  
11 651 [church-apology.html](https://www.nytimes.com/2015/07/10/world/americas/pope-francis-bolivia-catholic-church-apology.html)  
12  
13  
14  
15 652 4. Parliament of Australia. Prime Minister Kevin Rudd, MP—Apology to Australia's  
16  
17 653 indigenous peoples [television broadcast]. 2008.  
18  
19  
20  
21 654 5. Spencer G. Queen Signs Historic Maori Land Settlement. AP News. 1995 Nov 2  
22  
23 655 [cited 2023 Jan 6]. Available from:  
24  
25 656 <https://apnews.com/article/808c85d946ad2a26c29813a2403e808e>  
26  
27  
28  
29  
30 657 6. Jackson M. In the end "The hope of decolonization". In: McKinley E, Tuhiwai Smith  
31  
32 658 L, editors. Handbook of Indigenous education. Singapore: Springer; 2019. P. 101-  
33  
34 659 10.  
35  
36  
37  
38  
39 660 7. Wolfe P. Settler colonialism and the elimination of the native. J Genocide Res. 2006  
40  
41 661 Dec; 8(4): 387–409.  
42  
43  
44  
45 662 8. Reid P, Cormack D, Paine SJ. Colonial histories, racism and health—The  
46  
47 663 experience of Māori and Indigenous peoples. Public Health. 2019 Jul; 172: 119–24.  
48  
49  
50  
51 664 9. Zuberi T. Thicker than blood. How Racial Statistics Lie. Minnesota (USA): University  
52  
53 665 of Minnesota Press; 2013.  
54  
55  
56  
57  
58  
59  
60

- 1  
2  
3  
4 666 10. National Collaborating Centre for Indigenous Health. Reading C. Social  
5  
6 667 Determinants of Health: Understanding Racism. [Internet] Vancouver (CA): NCCIH;  
7  
8  
9 668 2020 [updated 2020 Sep 08; cited 2023 Jan 6]. Available from:  
10  
11 669 [https://www.nccih.ca/495/Understanding\\_racism.nccih?id=103](https://www.nccih.ca/495/Understanding_racism.nccih?id=103).  
12  
13  
14  
15 670 11. Paine S, Cormack D, Reid P, Harris R, Robson B. Kaupapa Māori-informed  
16  
17 671 approaches to support data rights and self-determination. In: Walter M, Kukutai T,  
18  
19  
20 672 Carroll S, Rodriguez-Lonebear D, editors. Indigenous Data Sovereignty and Policy.  
21  
22  
23 673 Oxfordshire (GB): Routledge; 2020. P. 187-203  
24  
25  
26 674 12. Youé C. Settler colonialism or colonies with settlers? Can J Afr Stud Rev Can  
27  
28  
29 675 Études Afr. 2018; 52(1): 69–85.  
30  
31  
32  
33 676 13. Allan B & Smylie J, First Peoples, second class treatment: The role of racism in the  
34  
35 677 health and well-being of Indigenous peoples in Canada. (2015). Toronto. The  
36  
37  
38 678 Wellesley Institute  
39  
40  
41  
42 679 14. Harding L. What's the harm? Examining the stereotyping of Indigenous peoples in  
43  
44 680 health systems. 2018.  
45  
46  
47  
48 681 15. Smylie J, Harris RB, Paine S, et al. Beyond shame, sorrow, and apologies – action  
49  
50 682 to address Indigenous health inequities. BMJ 2022; 378:o1688  
51  
52  
53  
54  
55  
56  
57  
58  
59  
60

- 1  
2  
3  
4 683 16. Nerestant A. Racism, prejudice contributed to Joyce Echaquan's death in hospital,  
5  
6 684 Quebec coroner's inquiry concludes. CBC News [Internet]. 2021 Oct 01 [cited 2023  
7  
8  
9 685 Jan 6]. Available from: [https://www.cbc.ca/news/canada/montreal/joyce-echaquan-](https://www.cbc.ca/news/canada/montreal/joyce-echaquan-systemic-racism-quebec-government-1.6196038)  
10  
11 686 [systemic-racism-quebec-government-1.6196038](https://www.cbc.ca/news/canada/montreal/joyce-echaquan-systemic-racism-quebec-government-1.6196038)
- 12  
13  
14  
15 687 17. CBC News. Atikamekw community "shocked" by François Legault comments on  
16  
17 688 Joyce Echaquan's death. CBC News [Internet]. 2022 Sep 17 [cited 2023 Jan 6].  
18  
19  
20 689 Available from: [https://www.cbc.ca/news/canada/montreal/atikamekw-shocked-](https://www.cbc.ca/news/canada/montreal/atikamekw-shocked-legault-joyce-echaquan-comment-1.6586853)  
21  
22 690 [legault-joyce-echaquan-comment-1.6586853](https://www.cbc.ca/news/canada/montreal/atikamekw-shocked-legault-joyce-echaquan-comment-1.6586853)
- 23  
24  
25  
26 691 18. Hall WJ, Chapman MV, Lee KM, Merino YM, Thomas TW, Payne BK, et al. Implicit  
27  
28  
29 692 Racial/Ethnic Bias Among Health Care Professionals and Its Influence on Health  
30  
31  
32 693 Care Outcomes: A Systematic Review. *Am J Public Health*. 2015 Dec; 105(12):  
33  
34 694 e60–76.
- 35  
36  
37  
38 695 19. FitzGerald C, Hurst S. Implicit bias in healthcare professionals: a systematic review.  
39  
40  
41 696 *BMC Med Ethics*. 2017 Mar; 18(1): 19.
- 42  
43  
44 697 20. Green AR, Carney DR, Pallin DJ, Ngo LH, Raymond KL, Iezzoni LI, et al. Implicit  
45  
46  
47 698 Bias among Physicians and its Prediction of Thrombolysis Decisions for Black and  
48  
49 699 White Patients. *J Gen Intern Med*. 2007 Sep; 22(9): 1231–8.
- 50  
51  
52  
53  
54  
55  
56  
57  
58  
59  
60

- 1  
2  
3  
4 700 21. The Truth Reconciliation Commission of Canada. Honouring the Truth, Reconciling  
5  
6 701 for the future: summary of the final report of the Truth and Reconciliation  
7  
8  
9 702 Commission of Canada. 2015  
10  
11  
12 703 22. Churchill M, Parent-Bergeron M, Smylie J, Fridkin A, Smylie D, Firestone M.  
13  
14  
15 704 Evidence Brief: Wise Practices for Indigenous-specific Cultural Safety Training  
16  
17 705 Programs [Internet]. Toronto: Well Living House Action Research Centre for  
18  
19  
20 706 Indigenous Infant, Child, and Family Health and Wellbeing; 2017 Aug [cited 2022  
21  
22  
23 707 Jan 06]. 21 p. Available from: [http://www.welllivinghouse.com/wp-](http://www.welllivinghouse.com/wp-content/uploads/2019/05/2017-Wise-Practices-in-Indigenous-Specific-Cultural-Safety-Training-Programs.pdf)  
24  
25 708 [content/uploads/2019/05/2017-Wise-Practices-in-Indigenous-Specific-Cultural-](http://www.welllivinghouse.com/wp-content/uploads/2019/05/2017-Wise-Practices-in-Indigenous-Specific-Cultural-Safety-Training-Programs.pdf)  
26  
27  
28 709 [Safety-Training-Programs.pdf](http://www.welllivinghouse.com/wp-content/uploads/2019/05/2017-Wise-Practices-in-Indigenous-Specific-Cultural-Safety-Training-Programs.pdf)  
29  
30  
31  
32 710 23. MacLean TL, Qiang JR, Henderson L, et al. Indigenous cultural safety training for  
33  
34 711 applied health, social work, and education professionals: a PRISMA scoping review.  
35  
36  
37 712 2023;20(6):5217  
38  
39  
40 713 24. Page MJ, McKenzie JE, Bossuyt PM, Boutron I, Hoffmann TC, Mulrow CD, et al.  
41  
42  
43 714 The PRISMA 2020 statement: an updated guideline for reporting systematic  
44  
45  
46 715 reviews. BMJ (Online). 2021 Mar; 372: n71.  
47  
48  
49 716 25. Lefebvre C, Glanville J, Briscoe S, Littlewood A, Marshall C, Metzendorf M, et al.  
50  
51  
52 717 Searching for and selecting studies. In: Cochrane Handbook for Systematic Reviews  
53  
54  
55 718 of Interventions. Chichester, UK: John Wiley & Sons, Ltd; 2019. p. 67–107  
56  
57  
58  
59  
60

- 1  
2  
3  
4 719 26. Harrison H, Griffin SJ, Kuhn I, Usher-Smith JA. Software tools to support title and  
5  
6 720 abstract screening for systematic reviews in healthcare: an evaluation. BMC Med  
7  
8  
9 721 Res Methodol. 2020 Jan; 20(1): 7.
- 10  
11  
12 722 27. Maddox R, Blais G, Mashford-Pringle A, Monchalin R, Firestone M, Ziegler C, et al.  
13  
14  
15 723 Reviewing Health Service and Program Evaluations in Indigenous Contexts: A  
16  
17 724 Systematic Review. Am J Eval. 2021; 42(3): 332–53.
- 18  
19  
20  
21 725 28. Morton Ninomiya ME, Atkinson D, Brascoupé S, Firestone M, Robinson N, Reading  
22  
23  
24 726 J, et al. Effective knowledge translation approaches and practices in Indigenous  
25  
26 727 health research: a systematic review protocol. Syst Rev. 2017 Feb; 6(1): 34.
- 27  
28  
29  
30 728 29. Smylie J, Kirst M, McShane K, Firestone M, Wolfe S, O'Campo P. Understanding  
31  
32  
33 729 the role of Indigenous community participation in Indigenous prenatal and infant-  
34  
35 730 toddler health promotion programs in Canada: A realist review. Soc Sci Med. 2016  
36  
37  
38 731 Feb; 150: 128–43.
- 39  
40  
41 732 30. Popay J, Roberts H, Sowden A, Petticrew M, Arai L, Rodgers M, et al. Guidance on  
42  
43  
44 733 the conduct of narrative synthesis in systematic reviews. A product from the ESRC  
45  
46  
47 734 methods programme Version. 2006 Apr; 1(1): b92.
- 48  
49  
50 735 31. Smylie J, Kaplan-Myrth N, McShane K, Métis Nation of Ontario-Ottawa Council  
51  
52  
53 736 Pikwakanagan First Nation Tungasuvvingat Inuit Family Resource Centre.  
54  
55 737 Indigenous knowledge translation: baseline findings in a qualitative study of the  
56  
57  
58  
59  
60



- 1  
2  
3  
4 738 pathways of health knowledge in three indigenous communities in Canada. *Health*  
5  
6 739 *Promot Pract.* 2009 Jul; 10(3): 436–46.  
7  
8  
9  
10 740 32. Smylie J. Knowledge translation and Indigenous knowledge. A decolonizing  
11  
12 741 perspective. In: Banister EM, Leadbeater BJ, Marshall A, editors. *Knowledge*  
13  
14 742 *Translation in community-based research and social policy contexts.* Toronto:  
15  
16 743 University of Toronto Press; 2011. p. 181–208.  
17  
18  
19  
20  
21 744 33. Smylie J, Olding M, Ziegler C. Sharing What We Know about Living a Good Life:  
22  
23 745 Indigenous Approaches to Knowledge Translation. *J Can Health Libr Assoc.* 2014;  
24  
25 746 35: 16–23.  
26  
27  
28  
29  
30 747 34. Allan B, Smylie J. All our relations: Indigenous Women’s Health in Canada. In:  
31  
32 748 Varcoe C, Hankivsky O, Morrow MH, editors. *Women’s health in Canada:*  
33  
34 749 *challenges of intersectionality.* Toronto, CA: University of Toronto Press; 2022.  
35  
36 750 p.116-117  
37  
38  
39  
40  
41 751 35. Kirkness VJ and Barnhardt R. First Nations and higher education: the four R’s -  
42  
43 752 respect, relevance, reciprocity, responsibility. *Journal of American Education.* 1991;  
44  
45 753 30(3): 1-15.  
46  
47  
48  
49  
50 754 36. Restoule JP. The five r’s of Indigenous research: Relationship, respect, relevance,  
51  
52 755 responsibility, and reciprocity. Workshop presented at: *Wise Practices II: Canadian*  
53  
54  
55  
56  
57  
58  
59  
60

- 1  
2  
3  
4 756 Aboriginal AIDS Network Research and Capacity Building Conference; 2008 Nov  
5  
6 757 26; Toronto.  
7  
8  
9  
10 758 37. Barajas JJ. Cultural Sensitivity for Healthcare Provides on the Tohono O'Odham  
11  
12 759 Nation: a Quality Improvement Project [dissertation]. Ann Arbor (USA): ProQuest  
13  
14 760 Dissertations Publishing; 2021. 92 p.  
15  
16  
17  
18 761 38. Barnabe C, Kherani RB, Appleton T, Umaefulam V, Henderson R, Crowshoe L.  
19  
20  
21 762 Participant-reported effect of an Indigenous health continuing professional  
22  
23 763 development initiative for specialists. BMC Med Educ. 2021 Dec; 21(1): 116.  
24  
25  
26  
27 764 39. Brewer KM, McCann CM, Harwood MLN. Working with Māori adults with aphasia:  
28  
29  
30 765 an online professional development course for speech-language therapists.  
31  
32 766 Aphasiology. 2020 Nov; 34(11): 1413–31.  
33  
34  
35  
36 767 40. Chapman R, Martin C, Smith T. Evaluation of staff cultural awareness before and  
37  
38 768 after attending cultural awareness training in an Australian emergency department.  
39  
40  
41 769 Int Emerg Nurs. 2014 Oct; 22(4): 179–84.  
42  
43  
44  
45 770 41. Crowshoe L, Han H, Calam B, Henderson R, Jacklin K, Walker L, et al. Impacts of  
46  
47 771 Educating for Equity Workshop on Addressing Social Barriers of Type 2 Diabetes  
48  
49 772 With Indigenous Patients. J Contin Educ Health Prof. 2018 Dec; 38(1): 49–59.  
50  
51  
52  
53  
54  
55  
56  
57  
58  
59  
60

- 1  
2  
3  
4 773 42. Delbridge R, Wilson A, Palermo C. Measuring the impact of a community of practice  
5  
6 774 in Aboriginal health. *Stud Contin Educ*. 2018 Jan; 40(1): 62–75.  
7  
8  
9  
10 775 43. Durey A, Halkett G, Berg M, Lester L, Kickett M. Does one workshop on respecting  
11  
12 776 cultural differences increase health professionals' confidence to improve the care of  
13  
14 777 Australian Aboriginal patients with cancer? An evaluation. *BMC Health Serv Res*.  
15  
16 778 2017 Dec; 17(1): 660.  
17  
18  
19  
20  
21 779 44. Hinton R, Bradley P, Trauer T, Nagel T. Strengthening acute inpatient mental health  
22  
23 780 care for Indigenous clients. *Adv Ment Health*. 2014 Aug; 12(2): 125–35.  
24  
25  
26  
27 781 45. Hulko W, Mahara MS, Wilson D, Campbell-McArthur G. Culturally safe dementia  
28  
29 782 care: Building nursing capacity to care for First Nation Elders with memory loss. *Int J*  
30  
31 783 *Older People Nurs*. 2021 Sep; 16(5): e12395.  
32  
33  
34  
35  
36 784 46. Kerrigan V, Lewis N, Cass A, Hefler M, Ralph AP. "How can I do more?" Cultural  
37  
38 785 awareness training for hospital-based healthcare providers working with high  
39  
40 786 Aboriginal caseload. *BMC Med Educ*. 2020 Dec; 20(1): 173.  
41  
42  
43  
44  
45 787 47. Kerrigan V, McGrath SY, Herdman RM, Puruntatameri P, Lee B, Cass A, et al.  
46  
47 788 Evaluation of 'Ask the Specialist': a cultural education podcast to inspire improved  
48  
49 789 healthcare for Aboriginal peoples in Northern Australia. *Health Sociol Rev*. 2022  
50  
51 790 May; 31(2): 139–57.  
52  
53  
54  
55  
56  
57  
58  
59  
60

- 1  
2  
3  
4 791 48. Liaw ST, Hasan I, Wade V, Canalese R, Kelaher M, Lau P, et al. Improving cultural  
5  
6 792 respect to improve Aboriginal health in general practice: a multi-methods and multi-  
7  
8  
9 793 perspective pragmatic study. *Aust Fam Physician*. 2015 Jun; 44(6): 387-92.  
10  
11  
12 794 49. Liaw S, Wade V, Furler JS, Hasan I, Lau P, Kelaher M, et al. Cultural respect in  
13  
14  
15 795 general practice: a cluster randomised controlled trial. *Med J Aust*. 2019 Apr; 210(6):  
16  
17 796 263–8.  
18  
19  
20  
21 797 50. McMichael B, Nickel A, Duffy EA, Skjefte L, Lee L, Park P, et al. The Impact of  
22  
23  
24 798 Health Equity Coaching on Patient's Perceptions of Cultural Competency and  
25  
26 799 Communication in a Pediatric Emergency Department: An Intervention Design. *J*  
27  
28  
29 800 *Patient Exp*. 2019 Dec; 6(4): 257–64.  
30  
31  
32  
33 801 51. Sauv e A, Cappelletti A, Murji L. Stand Up for Indigenous Health: A Simulation to  
34  
35 802 Educate Residents About the Social Determinants of Health Faced by Indigenous  
36  
37  
38 803 Peoples in Canada. *Acad Med*. 2022 Apr; 97(4): 518–23.  
39  
40  
41  
42 804 52. Wheeler AJ, Hu J, Tadakamadla SK, Hall K, Miller A, Kelly F. Development and  
43  
44 805 feasibility testing of a training programme for community pharmacists to deliver a  
45  
46  
47 806 culturally responsive medication review intervention. *Pilot Feasibility Stud*. 2022  
48  
49 807 Dec; 8(1): 51.  
50  
51  
52  
53 808 53. Curtis E, Jones R, Tipene-Leach D, Walker C, Loring B, Paine SJ, et al. Why  
54  
55  
56 809 cultural safety rather than cultural competency is required to achieve health equity: a

- 1  
2  
3  
4 810 literature review and recommended definition. *Int J Equity Health*. 2019 Nov; 18(1):  
5  
6 811 174.  
7  
8  
9  
10 812 54. Ramsden IM. Cultural safety and nursing education in Aotearoa and Te  
11  
12 813 Waipounamu [dissertation]. Wellington (NZ): Victoria University of Wellington; 2002.  
13  
14  
15 814 211 p.  
16  
17  
18 815 55. Kirkpatrick D. Great ideas revisited: Techniques for evaluating training programs.  
19  
20  
21 816 *Train Dev*. 1996; 50(1): 54.  
22  
23  
24  
25 817 56. Badger LW, deGruy F, Hartman J, Plant MA, Leeper J, Ficken R, et al. Stability of  
26  
27 818 standardized patients' performance in a study of clinical decision making. *Fam Med*.  
28  
29  
30 819 1995 Feb; 27(2): 126–31.  
31  
32  
33  
34 820 57. Colliver JA, Vu NV, Marcy ML, Travis TA, Robbs RS. Effects of examinee gender,  
35  
36 821 standardized-patient gender, and their interaction on standardized patients' ratings  
37  
38  
39 822 of examinees' interpersonal and communication skills. *Acad Med*. 1993; 68: 153–7.  
40  
41  
42  
43 823 58. Rethans JJ, Boven CP van. Simulated patients in general practice: a different look at  
44  
45 824 the consultation. *Br Med J Clin Res Ed*. 1987 Mar; 294(6575): 809–12.  
46  
47  
48 825  
49  
50  
51 826 59. Abad-Arranz M, Moran-Rodríguez A, Mascarós Balaguer E, Quintana Velasco C,  
52  
53  
54 827 Abad Polo L, Núñez Palomo S, et al. Community Assessment of COPD Health Care  
55  
56  
57  
58  
59  
60

1  
2  
3  
4 828 (COACH) study: a clinical audit on primary care performance variability in COPD  
5  
6 829 care. BMC Med Res Methodol. 2018; 18(1): 68–68.  
7  
8

9  
10 830 60. Crabtree A, Sundararaj JJ, Pease N. Clinical audit?—invaluable! BMJ Support  
11  
12 831 Palliat Care. 2020 Jun; 10(2): 213–5.  
13  
14

15  
16 832

### 17 18 833 **LIST OF ABBREVIATIONS**

19  
20  
21 834 Well Living House Quality Appraisal Tool (WLHQAT)

22  
23  
24 835 South Ontario Aboriginal Health Access Centre (SOAHAC)

25  
26  
27 836

### 28 29 837 **ACKNOWLEDGEMENTS**

30  
31  
32 838 The authors would like to acknowledge Michèle Parent Bergeron and SOAHAC for their  
33  
34 839 contributions to the study.  
35  
36

37 840

38  
39  
40 841

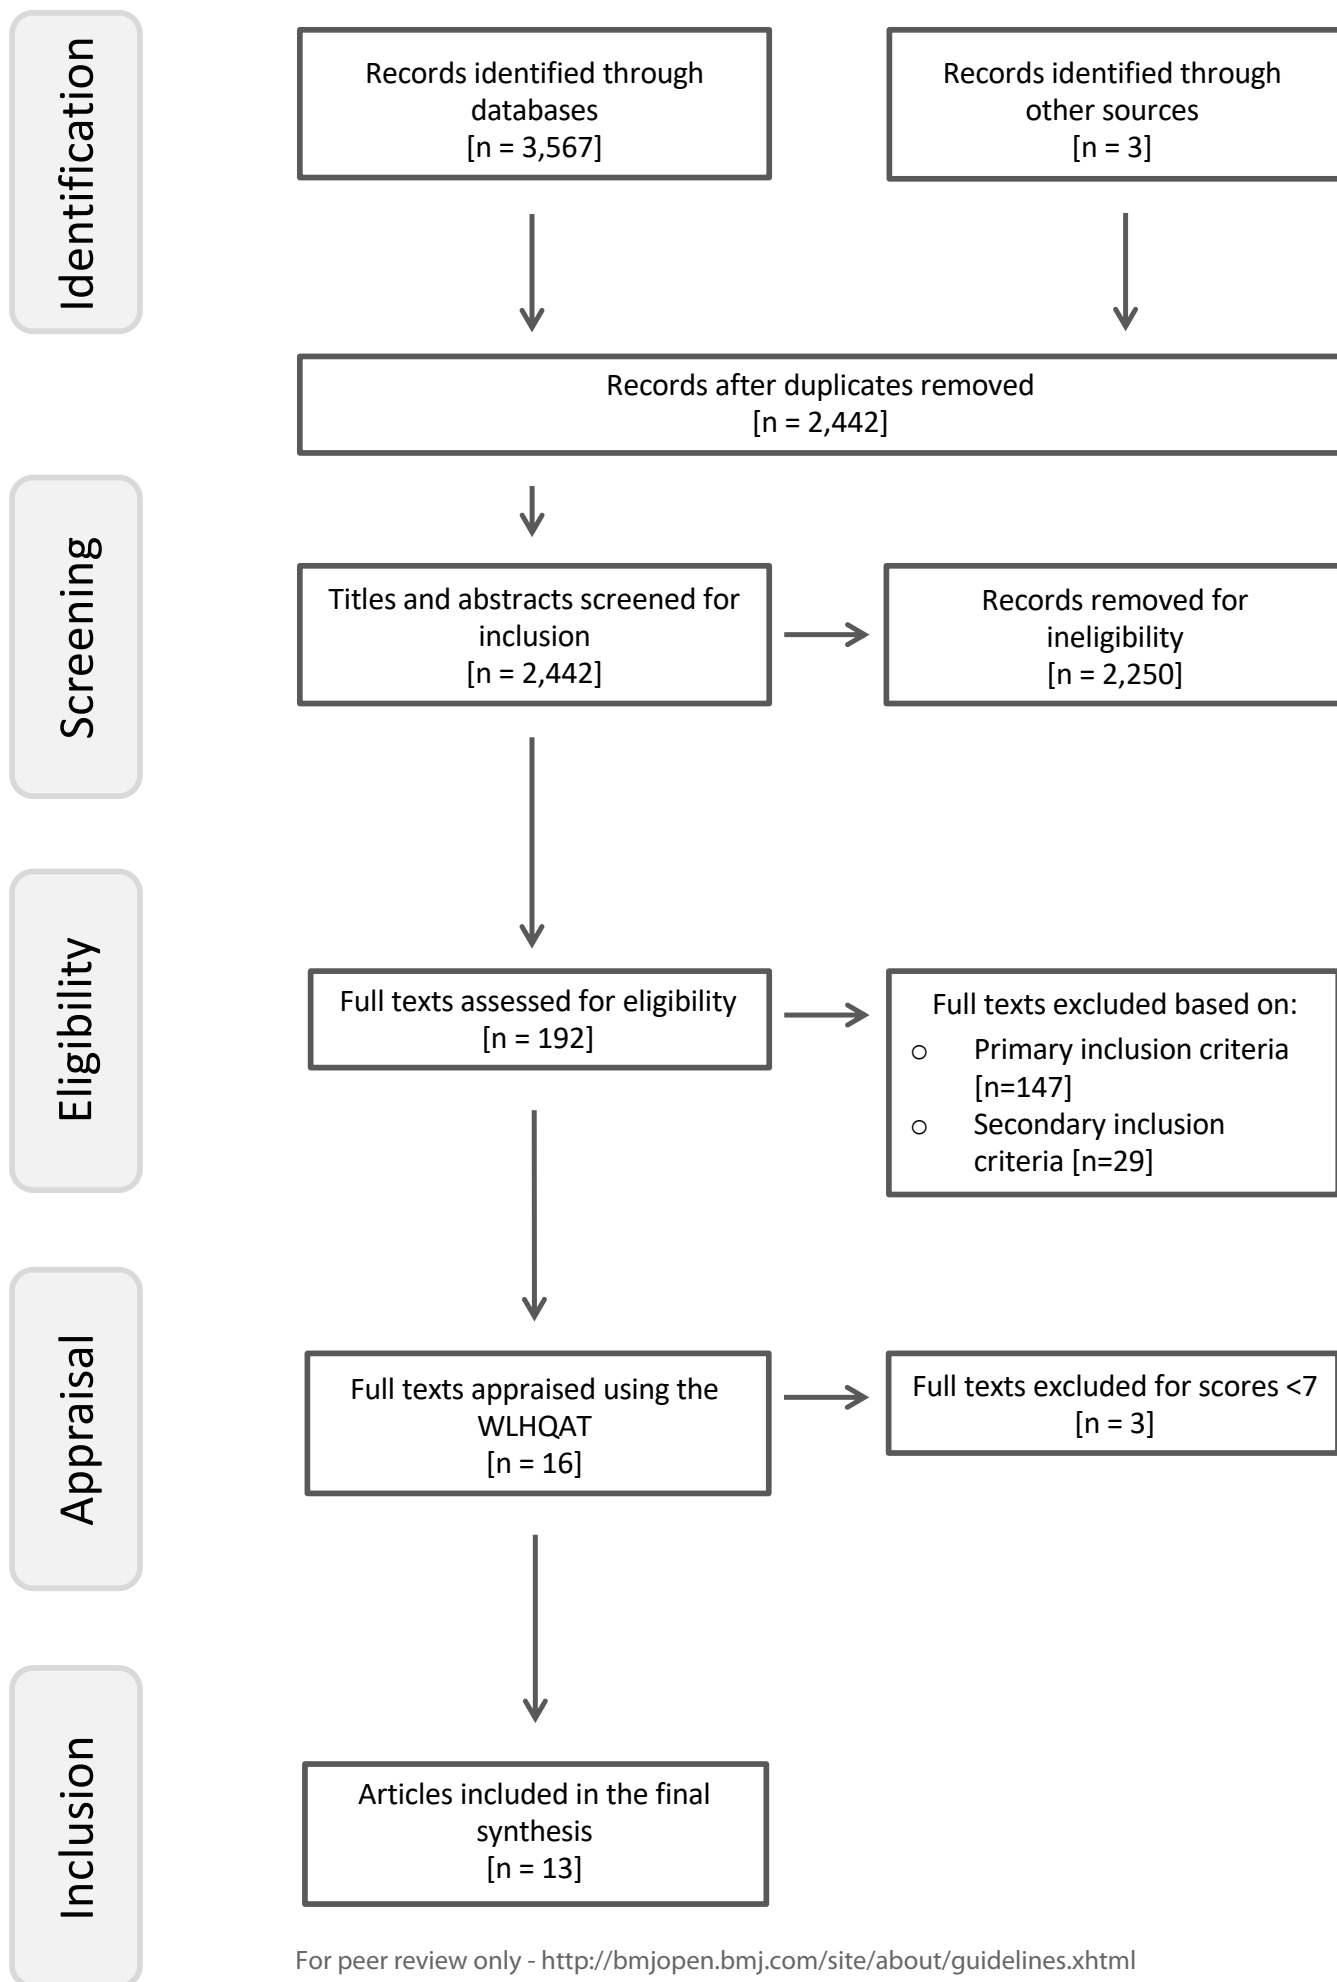

## Supplementary Figure 2

### Search Strategies:

Below are the full search strategies exactly as run on the fourth search update on May 12, 2022. Three previous searches were carried out using these strategies on September 18, 2018; July 30, 201; and March 9, 2021. The first search on September 18, 2018 was limited to articles published from 2006 and on.

### Ovid MEDLINE: Epub Ahead of Print, In-Process & Other Non-Indexed Citations, Ovid MEDLINE® Daily and Ovid MEDLINE® <1946-Present>

1 american native continental ancestry group/ or exp indians, north american/ or inuits/ or  
 2 exp Indigenous Peoples/ 19761  
 3 Oceanic Ancestry Group/ 11661  
 4 United States Indian Health Service/ 596  
 5 Health Services, Indigenous/ 3819  
 6 (Aborigin\* or Indigenous or Eskimo\* or Inuit\* or Inuk\* or Metis or First Nations or First  
 7 Nation or 1st nation or 1st nations or Native Canadian\* or Native American\* or Maori\* or Pacific  
 8 Islander\* or American Indian\* or Amerindian\* or Native Alaska\* or Alaska Native\* or Native  
 9 Hawaiian\* or Torres Strait Islander\* or on-reserve or off-reserve or tribal or autochtone\* or  
 10 amerindien\* or indigene\*).mp. 79690  
 11 6 (indian or indians).ti,ab,kw. 82911  
 12 India/ 115065  
 13 6 not 7 55466  
 14 1 or 2 or 3 or 4 or 5 or 8 128874  
 15 Cultural Competency/ 6278  
 16 Culturally Competent Care/ 2028  
 17 Transcultural Nursing/3442  
 18 cultural diversity/ 12558  
 19 cultural\* competenc\*.tw,kf. 4480  
 20 cultural\* safe\*.tw,kf. 941  
 21 cultural awareness.tw,kf. 717  
 22 cultural\* sensitiv\*.tw,kf. 5526  
 23 cultural\* secur\*.tw,kf.54  
 24 cultural humility.tw,kf. 407  
 25 cross-cultural.tw,kf. 15212  
 26 cultural\* respect\*.tw,kf. 115  
 27 anti-racis\*.tw,kf. 349



1  
2  
3 23 antiracis\*.tw,kf. 312  
4 24 postcolonial\*.tw,kf. 426  
5 25 colonial\*.tw,kf. 7112  
6 26 or/10-25 50752  
7 27 exp Health Personnel/581961  
8 28 "Attitude of Health Personnel"/ 129471  
9 29 "Internship and Residency"/ 57027  
10 30 ((health\* or medical or nurs\* or hospital) adj2 (personnel or provider\* or professional\*  
11 or worker\* or staff or specialist\* or employee\*)).tw,kf. 363535  
12 31 (doctor\* or physician\* or practitioner\* or nurse\* or clinician\* or hospitalist\* or dentist\*  
13 or therapist\* or physiotherapist\* or occupational therapist\* or psychologist\* or psychiatrist\* or  
14 counsel?or\* or social worker\* or midwi\* or paramedic\* or emergency medical technician\* or  
15 pharmacist\* or dietician\* or medic\* resident\*).tw,kf. 1374101  
16 32 or/27-31 1933424  
17 33 Education/ 21493  
18 34 curriculum/ 83087  
19 35 competency-based education/ 4429  
20 36 exp education, professional/ 321367  
21 37 exp Inservice Training/ 29907  
22 38 exp Teaching/ 91371  
23 39 exp Teaching Materials/ 123098  
24 40 exp Health Personnel/ed [Education] 63884  
25 41 cultural competency/ed 961  
26 42 Transcultural Nursing/ed [Education] 864  
27 43 exp Culture/ed [Education] 1033  
28 44 (training or education\* or learn\* or teach\* or workshop\* or curricul\* or pedagog\* or  
29 seminar\*).tw,kf. 1604662  
30 45 (professional development or staff development).tw,kf. 13772  
31 46 or/33-45 1870696  
32 47 9 and 26 and 32 and 46 945  
33 48 limit 47 to english language 934  
34 49 limit 48 to ed=20210308-20220512 123  
35 50 limit 48 to dt=20210308-20220512 111  
36 51 limit 48 to ez=20210308-20220512 111  
37 52 limit 48 to yr="2022 -Current" 50  
38 53 49 or 50 or 51 or 52 157  
39 54 remove duplicates from 53 155  
40  
41  
42  
43  
44  
45  
46  
47  
48  
49  
50  
51  
52  
53  
54  
55  
56  
57  
58  
59  
60

## Embase Classic+Embase &lt;1947 to 2022 May 11&gt;

1 indigenous people/ or alaska native/ or american indian/ or canadian aboriginal/ or first  
 2 nation/ or indigenous australian/ 32329  
 3  
 4  
 5  
 6 1 exp amerind people/ or exp australian aborigine/ or exp eskimo-aleut people/ or exp na-  
 7 dene people/ 7622  
 8  
 9 2 "maori (people)"/ or native hawaiian/ 2383  
 10  
 11 3 exp oceanic ancestry group/ 9022  
 12  
 13 4 indigenous health care/ 1176  
 14  
 15 5 (Aborigin\* or Indigenous or Eskimo\* or Inuit\* or Inuk\* or Metis or First Nations or First  
 16 Nation or 1st nation or 1st nations or Native Canadian\* or Native American\* or Maori\* or Pacific  
 17 Islander\* or American Indian\* or Amerindian\* or Native Alaska\* or Alaska Native\* or Native  
 18 Hawaiian\* or Torres Strait Islander\* or on-reserve or off-reserve or tribal or autochtone\* or  
 19 amerindien\* or indigene\*).ti,ab,kw. 93751  
 20  
 21 6 (indian or indians).ti,ab,kw. 114804  
 22  
 23 7 exp indian/ 40575  
 24  
 25 8 India/ 167974  
 26  
 27 9 8 or 9 201479  
 28  
 29 10 7 not 10 58826  
 30  
 31 11 (or/1-6) or 11 153454  
 32  
 33 12 cultural competence/ 7387  
 34  
 35 13 transcultural care/ 4825  
 36  
 37 14 cultural sensitivity/ 1261  
 38  
 39 15 cultural diversity/ 2692  
 40  
 41 16 cultural\* competenc\*.tw. 4546  
 42  
 43 17 cultural\* safe\*.tw. 1038  
 44  
 45 18 cultural awareness.tw. 839  
 46  
 47 19 cultural\* sensitiv\*.tw. 6598  
 48  
 49 20 cultural\* secur\*.tw. 71  
 50  
 51 21 cultural humility.tw. 426  
 52  
 53 22 cross-cultural.tw. 15606  
 54  
 55 23 cultural\* respect\*.tw. 137  
 56  
 57 24 anti-racis\*.tw. 310  
 58  
 59 25 antiracis\*.tw. 294  
 60  
 26 postcolonial\*.tw. 375  
 27 colonial\*.tw. 7139  
 28 or/13-28 45229  
 29 exp health care personnel/ 1856636

1  
2  
3 31 health personnel attitude/ 88298  
4 32 ((health\* or medical or nurs\* or hospital) adj2 (personnel or provider\* or professional\*  
5 or worker\* or staff or specialist\* or employee\*)).tw.478961  
6  
7 33 (doctor\* or physician\* or practitioner\* or nurse\* or clinician\* or hospitalist\* or dentist\*  
8 or therapist\* or physiotherapist\* or occupational therapist\* or psychologist\* or psychiatrist\* or  
9 counsel?or\* or social worker\* or midwi\* or paramedic\* or emergency medical technician\* or  
10 pharmacist\* or dietician\* or medic\* resident\*).tw. 1881277  
11  
12 34 30 or 31 or 32 or 33 3109487  
13  
14 35 education/ or continuing education/ or course content/ or curriculum/ or curriculum  
15 development/ or education program/ or "outcome of education"/ 615015  
16  
17 36 in service training/ 16717  
18  
19 37 teaching/ 108269  
20  
21 38 (training or education\* or learn\* or teach\* or workshop\* or curricul\* or pedagog\* or  
22 seminar\*).tw. 2082644  
23  
24 39 (professional development or staff development).tw. 15840  
25  
26 40 35 or 36 or 37 or 38 or 39 2297974  
27  
28 41 12 and 29 and 34 and 40 930  
29  
30 42 limit 41 to embase 254  
31  
32 43 limit 42 to english language 253  
33  
34 44 limit 43 to dc=20210308-20220512 42

34 **EBM Reviews - Cochrane Central Register of Controlled Trials <April 2022>**

35 **EBM Reviews - Cochrane Database of Systematic Reviews <2005 to May 11, 2022>**

36  
37  
38 1 american native continental ancestry group/ or exp indians, north american/ or inuits/ or  
39 exp Indigenous Peoples/ 327  
40  
41 2 Oceanic Ancestry Group/ 7  
42  
43 3 United States Indian Health Service/ 4  
44  
45 4 Health Services, Indigenous/ 47  
46  
47 5 (Aborigin\* or Indigenous or Eskimo\* or Inuit\* or Inuk\* or Metis or First Nations or First  
48 Nation or 1st nation or 1st nations or Native Canadian\* or Native American\* or Maori\* or Pacific  
49 Islander\* or American Indian\* or Amerindian\* or Native Alaska\* or Alaska Native\* or Native  
50 Hawaiian\* or Torres Strait Islander\* or on-reserve or off-reserve or tribal or autochtone\* or  
51 amerindien\* or indigene\*).mp. 3033  
52  
53 6 (indian or indians).ti,ab,kw. 5091  
54  
55 7 India/ 2437  
56  
57 8 6 not 7 4449  
58  
59  
60

1  
2  
3  
4  
5  
6  
7  
8  
9  
10  
11  
12  
13  
14  
15  
16  
17  
18  
19  
20  
21  
22  
23  
24  
25  
26  
27  
28  
29  
30  
31  
32  
33  
34  
35  
36  
37  
38  
39  
40  
41  
42  
43  
44  
45  
46  
47  
48  
49  
50  
51  
52  
53  
54  
55  
56  
57  
58  
59  
60

9 1 or 2 or 3 or 4 or 5 or 8 6754

10 Cultural Competency/ 190

11 Culturally Competent Care/ 110

12 Transcultural Nursing/14

13 cultural diversity/ 79

14 cultural\* competenc\*.tw,kf. 100

15 cultural\* safe\*.tw,kf. 35

16 cultural awareness.tw,kf. 13

17 cultural\* sensitiv\*.tw,kf. 589

18 cultural\* secur\*.tw,kf.8

19 cultural humility.tw,kf. 11

20 cross-cultural.tw,kf. 357

21 cultural\* respect\*.tw,kf. 8

22 anti-racis\*.tw,kf. 9

23 antiracis\*.tw,kf. 1

24 postcolonial\*.tw,kf. 1

25 colonial\*.tw,kf. 34

26 or/10-25 1413

27 exp Health Personnel/10279

28 "Attitude of Health Personnel"/ 2059

29 "Internship and Residency"/ 1373

30 ((health\* or medical or nurs\* or hospital) adj2 (personnel or provider\* or professional\*  
31 or worker\* or staff or specialist\* or employee\*)).tw,kf. 31086

32 (doctor\* or physician\* or practitioner\* or nurse\* or clinician\* or hospitalist\* or dentist\*  
33 or therapist\* or physiotherapist\* or occupational therapist\* or psychologist\* or psychiatrist\* or  
34 counsel?or\* or social worker\* or midwi\* or paramedic\* or emergency medical technician\* or  
35 pharmacist\* or dietician\* or medic\* resident\*).tw,kf. 147680

36 or/27-31 169128

37 Education/ 608

38 curriculum/ 1584

39 competency-based education/ 89

40 exp education, professional/ 5404

41 exp Inservice Training/ 835

42 exp Teaching/ 4681

43 exp Teaching Materials/ 4501

44 exp Health Personnel/ed [Education] 16

45 cultural competency/ed 0

46 Transcultural Nursing/ed [Education] 0

1  
2  
3 43 exp Culture/ed [Education] 1  
4 44 (training or education\* or learn\* or teach\* or workshop\* or curricul\* or pedagog\* or  
5 seminar\*).tw,kf. 196173  
6  
7 45 (professional development or staff development).tw,kf. 475  
8  
9 46 or/33-45 200177  
10  
11 47 9 and 26 and 32 and 46 47  
12 48 limit 47 to yr="2021 -Current" 6  
13 49 remove duplicates from 48 6  
14  
15

### APA PsycInfo <1806 to May Week 2 2022>

18  
19 1 exp indigenous populations/ 15198  
20 2 tribes/ 1259  
21 3 (Aborigin\* or Indigenous or Eskimo\* or Inuit\* or Inuk\* or Metis or First Nations or First  
22 Nation or 1st nation or 1st nations or Native Canadian\* or Native American\* or Maori\* or Pacific  
23 Islander\* or American Indian\* or Amerindian\* or Native Alaska\* or Alaska Native\* or Native  
24 Hawaiian\* or Torres Strait Islander\* or on-reserve or off-reserve or tribal or autochtone\* or  
25 amerindien\* or indigene\*).tw. 31755  
26  
27 4 ((indian or indians) not india).tw. 15700  
28  
29 5 1 or 2 or 3 or 442412  
30  
31 6 cultural sensitivity/ 7916  
32  
33 7 cultural\* competenc\*.tw. 5610  
34  
35 8 cultural\* safe\*.tw. 369  
36  
37 9 cultural awareness.tw. 1291  
38  
39 10 cultural\* sensitiv\*.tw. 6987  
40  
41 11 cultural\* secur\*.tw. 29  
42  
43 12 cultural humility.tw. 482  
44  
45 13 cross-cultural.tw. 37152  
46  
47 14 cultural\* respect\*.tw. 101  
48  
49 15 anti-racis\*.tw. 836  
50  
51 16 antiracis\*.tw. 650  
52  
53 17 postcolonial\*.tw. 2067  
54  
55 18 colonial\*.tw. 6809  
56  
57 19 or/6-18 62234  
58  
59 20 exp health personnel attitudes/ 25839  
60  
61 21 medical residency/ 4825  
62  
63 22 ((health\* or medical or nurs\* or hospital) adj2 (personnel or provider\* or professional\*  
64 or worker\* or staff or specialist\* or employee\*)).tw.122311

23 (doctor\* or physician\* or practitioner\* or nurse\* or clinician\* or hospitalist\* or dentist\*  
 24 or therapist\* or physiotherapist\* or occupational therapist\* or psychologist\* or psychiatrist\* or  
 25 counsel?or\* or social worker\* or midwi\* or paramedic\* or emergency medical technician\* or  
 26 pharmacist\* or dietician\* or medic\* resident\*).tw. 579592  
 27 20 or 21 or 22 or 23 654864  
 28 education/ 40342  
 29 curriculum/ or curriculum development/ 34802  
 30 exp continuing education/ or professional development/ 26018  
 31 educational programs/ or educational program evaluation/ or multicultural education/  
 32 36396  
 33 personnel training/ or sensitivity training/ 11256  
 34 training/ or communication skills training/ or sensitivity training/ 27011  
 35 exp teaching/ 131059  
 36 (training or education\* or learn\* or teach\* or workshop\* or curricul\* or pedagog\* or  
 37 seminar\*).tw. 1241080  
 38 (professional development or staff development).tw. 27110  
 39 or/25-33 1267277  
 40 5 and 19 and 24 and 34 599  
 limit 35 to (chapter or "column/opinion" or "comment/reply" or editorial or letter or  
 review-book or review-media or review-software & other) 96  
 35 35 not 36 503  
 36 limit 37 to english language 484  
 37 limit 38 to up=20210308-20220512 41  
 38 remove duplicates from 39 41

### CINAHL Search History

Interface - EBSCOhost Research Databases

Search Screen - Advanced Search

Database - CINAHL Complete

| #   | Query                | Limiters/Expanders                                                     | Results |
|-----|----------------------|------------------------------------------------------------------------|---------|
| S31 | S29 AND S30          | Expanders - Apply equivalent subjects<br>Search modes - Boolean/Phrase | 109     |
| S30 | EM 20210308-20220512 | Expanders - Apply equivalent subjects                                  | 474,059 |

|     |                                                                                                      |                                                                                                                 |           |
|-----|------------------------------------------------------------------------------------------------------|-----------------------------------------------------------------------------------------------------------------|-----------|
|     |                                                                                                      | Search modes -<br>Boolean/Phrase                                                                                |           |
| S29 | S22 OR S26                                                                                           | Limiters - English<br>Language<br>Expanders - Apply<br>equivalent subjects<br>Search modes -<br>Boolean/Phrase  | 1,304     |
| S28 | S27                                                                                                  | Search modes -<br>Boolean/Phrase                                                                                | 1,173     |
| S27 | S22 OR S26                                                                                           | Limiters -<br>Published Date:<br>20060101-<br>20181231; English<br>Language<br>Search modes -<br>Boolean/Phrase | 709       |
| S26 | S6 AND S25                                                                                           | Search modes -<br>Boolean/Phrase                                                                                | 95        |
| S25 | S23 OR S24                                                                                           | Search modes -<br>Boolean/Phrase                                                                                | 1,087     |
| S24 | (MH "Cultural Safety/ED")                                                                            | Search modes -<br>Boolean/Phrase                                                                                | 38        |
| S23 | (MH "Cultural Competence/ED")                                                                        | Search modes -<br>Boolean/Phrase                                                                                | 1,049     |
| S22 | S6 AND S12 AND S17 AND S21                                                                           | Search modes -<br>Boolean/Phrase                                                                                | 1,144     |
| S21 | S18 OR S19 OR S20                                                                                    | Search modes -<br>Boolean/Phrase                                                                                | 1,285,878 |
| S20 | (professional development or staff<br>development)                                                   | Search modes -<br>Boolean/Phrase                                                                                | 73,618    |
| S19 | (training or education* or learn* or teach* or<br>workshop* or curricul* or pedagog* or<br>seminar*) | Search modes -<br>Boolean/Phrase                                                                                | 1,144,026 |

|     |                                                                                                                                                                                                                                                                                                                                       |                               |           |
|-----|---------------------------------------------------------------------------------------------------------------------------------------------------------------------------------------------------------------------------------------------------------------------------------------------------------------------------------------|-------------------------------|-----------|
| S18 | (MH "Education") OR (MH "Curriculum+") OR (MH "Education, Competency-Based") OR (MH "Teaching") OR (MH "Teaching Materials+") OR (MH "Teaching Methods+")                                                                                                                                                                             | Search modes - Boolean/Phrase | 293,141   |
| S17 | S13 OR S14 OR S15 OR S16                                                                                                                                                                                                                                                                                                              | Search modes - Boolean/Phrase | 1,524,544 |
| S16 | (doctor* or physician* or practitioner* or nurse* or clinician* or hospitalist* or dentist* or therapist* or physiotherapist* or occupational therapist* or psychologist* or psychiatrist* or counselor* or social worker* or midwi* or paramedic* or emergency medical technician* or pharmacist* or dietician* or medic* resident*) | Search modes - Boolean/Phrase | 1,220,148 |
| S15 | ((health* or medical or nurs* or hospital) N2 (personnel or provider* or professional* or worker* or staff or specialist* or employee*))                                                                                                                                                                                              | Search modes - Boolean/Phrase | 375,539   |
| S14 | (MH "Attitude of Health Personnel+")                                                                                                                                                                                                                                                                                                  | Search modes - Boolean/Phrase | 114,454   |
| S13 | (MH "Health Personnel+")                                                                                                                                                                                                                                                                                                              | Search modes - Boolean/Phrase | 627,401   |
| S12 | S7 OR S8 OR S9 OR S10 OR S11                                                                                                                                                                                                                                                                                                          | Search modes - Boolean/Phrase | 51,961    |
| S11 | cultural* competenc* or cultural* safe* or cultural awareness or cultural* sensitiv* or cultural* secur* or cultural humility or cross-cultural or cultural* respect* or anti-racis* or antiracis* or postcolonial* or colonial*                                                                                                      | Search modes - Boolean/Phrase | 31,303    |
| S10 | (MH "Cultural Diversity") OR (MH "Cultural Values")                                                                                                                                                                                                                                                                                   | Search modes - Boolean/Phrase | 24,283    |
| S9  | (MH "Transcultural Care")                                                                                                                                                                                                                                                                                                             | Search modes - Boolean/Phrase | 3,296     |
| S8  | (MH "Cultural Safety")                                                                                                                                                                                                                                                                                                                | Search modes - Boolean/Phrase | 778       |



|    |                                                                                                                                                                                                                                                                                                                                                                                                               |                               |        |
|----|---------------------------------------------------------------------------------------------------------------------------------------------------------------------------------------------------------------------------------------------------------------------------------------------------------------------------------------------------------------------------------------------------------------|-------------------------------|--------|
| S7 | (MH "Cultural Competence")                                                                                                                                                                                                                                                                                                                                                                                    | Search modes - Boolean/Phrase | 11,142 |
| S6 | S1 OR S2 OR S5                                                                                                                                                                                                                                                                                                                                                                                                | Search modes - Boolean/Phrase | 55,137 |
| S5 | S3 NOT S4                                                                                                                                                                                                                                                                                                                                                                                                     | Search modes - Boolean/Phrase | 12,493 |
| S4 | (MH "India")                                                                                                                                                                                                                                                                                                                                                                                                  | Search modes - Boolean/Phrase | 42,378 |
| S3 | TI ( (indian or indians) ) OR AB ( (indian or indians) )                                                                                                                                                                                                                                                                                                                                                      | Search modes - Boolean/Phrase | 22,181 |
| S2 | (Aborigin* or Indigenous or Eskimo* or Inuit* or Inuk* or Metis or First Nations or First Nation or 1st nation or 1st nations or Native Canadian* or Native American* or Maori* or Pacific Islander* or American Indian* or Amerindian* or Native Alaska* or Alaska Native* or Native Hawaiian* or Torres Strait Islander* or on-reserve or off-reserve or tribal or autochtone* or amerindien* or indigene*) | Search modes - Boolean/Phrase | 47,753 |
| S1 | (MH "Indigenous Peoples+") OR (MH "Health Services, Indigenous") OR (MH "Indigenous Health")                                                                                                                                                                                                                                                                                                                  | Search modes - Boolean/Phrase | 23,870 |

### ProQuest Search Strategy

#### Search Strategy

| Set# | Searched for                                                                                                                                                                                                                                                                                                                                                             | Databases                                                                                                                                                                         | Results |
|------|--------------------------------------------------------------------------------------------------------------------------------------------------------------------------------------------------------------------------------------------------------------------------------------------------------------------------------------------------------------------------|-----------------------------------------------------------------------------------------------------------------------------------------------------------------------------------|---------|
| S1   | noft((Aborigin* OR Indigenous OR Eskimo* OR Inuit* OR Inuk* OR Metis OR First Nations OR First Nation OR 1st nation OR 1st nations OR "Native Canadian*" OR "Native American*" OR Maori* OR "Pacific Islander*" OR "American Indian*" OR Amerindian* OR "Native Alaska*" OR "Alaska Native*" OR "Native Hawaiian*" OR "Torres Strait Islander*" OR "on-reserve" OR "off- | Applied Social Sciences Index & Abstracts (ASSIA), ERIC, International Bibliography of the Social Sciences (IBSS), ProQuest Dissertations & Theses Global, Sociological Abstracts | 7452    |

|    |                                                                                                                                                                                                                                                                                                                                                                                                                                                       |                                                                                                                                                                                   |        |
|----|-------------------------------------------------------------------------------------------------------------------------------------------------------------------------------------------------------------------------------------------------------------------------------------------------------------------------------------------------------------------------------------------------------------------------------------------------------|-----------------------------------------------------------------------------------------------------------------------------------------------------------------------------------|--------|
|    | reserve" OR tribal OR autochtone* OR amerindien* OR indigene*) AND la.exact("English") AND pd(>20201231)                                                                                                                                                                                                                                                                                                                                              |                                                                                                                                                                                   |        |
| S2 | noft(("cultural* competenc*" OR "cultural* safe*" OR "cultural awareness" OR "cultural* sensitiv*" OR "cultural* secur*" OR "cultural humility" OR "cross-cultural" OR "cultural* respect*" OR "anti-racis*" OR antiracis* OR postcolonial* OR colonial*)) AND la.exact("English") AND pd(>20201231)                                                                                                                                                  | Applied Social Sciences Index & Abstracts (ASSIA), ERIC, International Bibliography of the Social Sciences (IBSS), ProQuest Dissertations & Theses Global, Sociological Abstracts | 10129  |
| S3 | noft((health* OR medical OR nurs* OR hospital) NEAR/2 (personnel OR provider* OR professional* OR worker* OR staff OR specialist* OR employee*)) AND la.exact("English") AND pd(>20201231)                                                                                                                                                                                                                                                            | Applied Social Sciences Index & Abstracts (ASSIA), ERIC, International Bibliography of the Social Sciences (IBSS), ProQuest Dissertations & Theses Global, Sociological Abstracts | 10349  |
| S4 | noft((((doctor* OR physician* OR practitioner* OR nurse* OR clinician* OR hospitalist* OR dentist* OR therapist* OR physiotherapist* OR ("occupational therapist" OR "occupational therapists") OR psychologist* OR psychiatrist* OR counsellor* OR ("social worker" OR "social workers") OR midwi* OR paramedic* OR "emergency medical technician*" OR pharmacist* OR dietician* OR "medic* resident*")))) AND la.exact("English") AND pd(>20201231) | Applied Social Sciences Index & Abstracts (ASSIA), ERIC, International Bibliography of the Social Sciences (IBSS), ProQuest Dissertations & Theses Global, Sociological Abstracts | 31501  |
| S5 | noft(((training OR education* OR learn* OR teach* OR workshop* OR curricul* OR pedagog* OR seminar* OR "professional development" OR "staff development")))) AND la.exact("English") AND pd(>20201231)                                                                                                                                                                                                                                                | Applied Social Sciences Index & Abstracts (ASSIA), ERIC, International Bibliography of the Social Sciences (IBSS), ProQuest Dissertations & Theses Global, Sociological Abstracts | 115033 |
| S6 | (S1 AND S2 AND (S3 OR S4) AND S5)                                                                                                                                                                                                                                                                                                                                                                                                                     | Applied Social Sciences Index & Abstracts (ASSIA), ERIC, International Bibliography of the Social Sciences (IBSS), ProQuest Dissertations & Theses Global, Sociological Abstracts | 77     |

## Bibliography of Indigenous Peoples in North America (EBSCOhost)

### 2 Results

(( ((health\* or medical or nurs\* or hospital) N2 (personnel or provider\* or professional\* or worker\* or staff or specialist\* or employee\*)) ) OR ( (doctor\* or physician\* or practitioner\* or nurse\* or clinician\* or hospitalist\* or dentist\* or therapist\* or physiotherapist\* or occupational therapist\* or psychologist\* or psychiatrist\* or counsel?or\* or social worker\* or midwi\* or paramedic\* or emergency medical technician\* or pharmacist\* or dietician\* or medic\* resident\*) ))

AND

( ("cultural\* competenc\*" or "cultural\* safe\*" or "cultural awareness" or "cultural\* sensitiv\*" or "cultural\* secur\*" or "cultural humility" or "cross-cultural" or "cultural\* respect\*" or "anti-racis\*" or antiracis\*) )

AND

( (training or education\* or learn\* or teach\* or workshop\* or curricul\* or pedagog\* or seminar\* or "professional development" or "staff development") )

Limit to 2021-2022, English Language, Academic Journals

### Web of Science

Science Citation Index Expanded (SCI-EXPANDED)

Social Sciences Citation Index (SSCI)

93 Results

((TS=("cultural\* competenc\*" or "cultural\* safe\*" or "cultural awareness" or "cultural\* sensitiv\*" or "cultural\* secur\*" or "cultural humility" or "cross-cultural" or "cultural\* respect\*" or "anti-racis\*" or antiracis\*) AND TS=(training or education\* or learn\* or teach\* or workshop\* or curricul\* or pedagog\* or seminar\* or "professional development" or "staff development") AND TS=(Aborigin\* or Indigenous or Eskimo\* or Inuit\* or Inuk\* or Metis or First Nations or First Nation or 1st nation or 1st nations or Native Canadian\* or Native American\* or Maori\* or Pacific Islander\* or American Indian\* or Amerindian\* or Native Alaska\* or Alaska Native\* or Native Hawaiian\* or Torres Strait Islander\* or on-reserve or off-reserve or tribal or autochtone\* or amerindien\* or indigene\*) AND TS=("health care" or healthcare or hospital\* or medical or nurses or doctors)))

Timespan: 2021-03-08 to 2022-05-12 (Index Date)

## Supplementary Figure 3

## Well Living House Quality Appraisal Tool

Citation (Title, Author, Date) [INSERT FOR EACH STUDY]

Local Community Relevance of Method and Measures (Score out of 4)

|                                                                                                                                                         |                                                                                                                                                                                                                                                                                                                                                                                                                                                                                                             |
|---------------------------------------------------------------------------------------------------------------------------------------------------------|-------------------------------------------------------------------------------------------------------------------------------------------------------------------------------------------------------------------------------------------------------------------------------------------------------------------------------------------------------------------------------------------------------------------------------------------------------------------------------------------------------------|
| Did the measures of success reflect local Indigenous community understandings of success?                                                               | <p>Yes = 2 (look for: outcomes are derived from community members/ are the outcomes reflecting indigenous concepts evidence provided explicitly in the text where did evaluation take place, who collected evaluation data?)</p> <p>Partial = 1 (hints of including local community values/beliefs/knowledge systems in text and therefore assumption made by reviewers that evidence is present)</p> <p>No = 0 (nothing was said or author(s) indicated that success was not defined by the community)</p> |
| Had methods and tools been tested and validated previously in a similar Indigenous context and reviewed for relevance by appropriate community members? | <p>Yes = 2 (evidence is provided explicitly in text)</p> <p>Partial = 1 (hints of using a tool that has been used in Indigenous contexts and therefore assumption made by reviewers that evidence is present)</p> <p>No = 0 (nothing was said or author(s) said that the evaluation method/tool has not been used in Indigenous contexts)</p>                                                                                                                                                               |

Rigour and internal validity of the evaluation method (Score out of 4)

|                                                                                        |                                                                                                                                                                                                                                                                                                                                                                                                                                                                                                                                                                                                                                                                                                                                                                |
|----------------------------------------------------------------------------------------|----------------------------------------------------------------------------------------------------------------------------------------------------------------------------------------------------------------------------------------------------------------------------------------------------------------------------------------------------------------------------------------------------------------------------------------------------------------------------------------------------------------------------------------------------------------------------------------------------------------------------------------------------------------------------------------------------------------------------------------------------------------|
| Do the quantitative or qualitative methods meet relevant rigour and internal validity? | <p>Excellent = 4<br/>Fair = 3<br/>Barely Acceptable = 2<br/>Poor = 1</p> <p>Generally: Is the study design appropriate for evaluation research question(s)? Are the conclusions supported and justified by the results?</p> <p><u>Quantitative</u>: Is the sample size described and justified? Are the instruments/tools already validated?</p> <p>Are threats to validity addressed (such as confounding factors)?</p> <p><u>Qualitative</u>: Are the participants selected using appropriate strategies (such as purposive sample or until saturation is reached)? Is there clearly articulated theoretical approach/methodology/ data collection methods and analytic lens – do these fit together? Is there evidence of truthfulness of the findings?</p> |
|----------------------------------------------------------------------------------------|----------------------------------------------------------------------------------------------------------------------------------------------------------------------------------------------------------------------------------------------------------------------------------------------------------------------------------------------------------------------------------------------------------------------------------------------------------------------------------------------------------------------------------------------------------------------------------------------------------------------------------------------------------------------------------------------------------------------------------------------------------------|

Strength of the Evidence (score out of 4)

|                         |                                                                                                                                                                                                                                                                                                                        |
|-------------------------|------------------------------------------------------------------------------------------------------------------------------------------------------------------------------------------------------------------------------------------------------------------------------------------------------------------------|
| Is the evidence strong? | <p>Excellent = 4<br/>Fair = 3<br/>Barely Acceptable = 2<br/>Poor = 1</p> <p><u>Quantitative</u>: Does the evidence have adequate power and statistical significance? Is the response rate reasonable?</p> <p><u>Qualitative</u>: Are there major and convincing themes from triangulation, and/or member checking?</p> |
|-------------------------|------------------------------------------------------------------------------------------------------------------------------------------------------------------------------------------------------------------------------------------------------------------------------------------------------------------------|

Total Score:

## Supplementary File 1 – Study Screening Protocol

**Screening Protocol**

**Working Title:** Wise practices – what we know about the design and implementation of Indigenous cultural safety training programs for service providers: a scoping review

**Primary Research Question:** What are the impacts of Indigenous cultural safety, competency or other educational interventions on non-Indigenous health and social service providers' knowledge, attitudes, and culturally safe practices

**Secondary Research Questions:** Are there specific training approaches, strategies, formats or content

**Date:** October 1, 2018

**Screening software:** colandr <https://colandrapp.com/signin> OR abstrackr <http://abstrackr.cebm.brown.edu/>

**Level 1 Screening: Titles and Abstracts**

|                                                                                                                                                                                                                                    | Yes | No | Unclear |
|------------------------------------------------------------------------------------------------------------------------------------------------------------------------------------------------------------------------------------|-----|----|---------|
| Does the title/abstract indicate that the article is specific to <u>Indigenous contexts</u> in what is now known as Canada, the United States, Australia, or New Zealand?                                                          |     |    |         |
| Does the title/abstract indicate that the article explores <u>educational interventions (workshops, training, coursework, sessions, etc.)</u> that are designed/implemented to improve cultural safety, cultural competency, etc.? |     |    |         |
| Does the title/abstract indicate that the article focuses on education for <u>adult learners who provide services</u> (e.g. health services) to Indigenous peoples?                                                                |     |    |         |

- If all yes, include
- If all yes and some unclear, include
- If one no, exclude

## Supplementary File 1 – Study Screening Protocol

## Level 2 Screening: Full-Text

|                                                                                                                                                                                                                                                   | Yes | No | Unclear |
|---------------------------------------------------------------------------------------------------------------------------------------------------------------------------------------------------------------------------------------------------|-----|----|---------|
| Is the article specific to <u>Indigenous contexts</u> in what is now known as Canada, the United States, Australia, or New Zealand?                                                                                                               |     |    |         |
| Does the article explore <u>educational interventions (workshops, training, coursework, sessions, etc.)</u> that are designed/implemented to improve cultural safety, cultural competency, etc.?                                                  |     |    |         |
| Does the article focus on education for <u>adult learners who provide services (e.g. health services)</u> to Indigenous peoples?                                                                                                                  |     |    |         |
| Does the article include a <u>information about outcomes</u> for the educational intervention (definition of outcome is broadly defined and can include, for example, microaggression scales, academic understanding, anti-racist measures etc.)? |     |    |         |

- If all yes, include
- If one no, exclude

## Supplementary File 2

## Data Extraction Form for Indigenous Cultural Safety Education for Healthcare Providers

|                                                                                                                                                                                             |  |             |
|---------------------------------------------------------------------------------------------------------------------------------------------------------------------------------------------|--|-------------|
| Reviewer Name:                                                                                                                                                                              |  |             |
| Authors:                                                                                                                                                                                    |  |             |
| Year:                                                                                                                                                                                       |  |             |
| Title:                                                                                                                                                                                      |  |             |
| Journal:                                                                                                                                                                                    |  |             |
| <b>Study Characteristics</b>                                                                                                                                                                |  | <i>Page</i> |
| Type of publication<br>(manuscript, report, etc.)                                                                                                                                           |  |             |
| Type of study (quantitative,<br>qualitative, mixed methods)                                                                                                                                 |  |             |
| Study Design (RCT, quasi-<br>experimental, qualitative)                                                                                                                                     |  |             |
| Location and time frame                                                                                                                                                                     |  |             |
| Aim of the study                                                                                                                                                                            |  |             |
| <b>Population</b>                                                                                                                                                                           |  | <i>Page</i> |
| Discipline                                                                                                                                                                                  |  |             |
| Sampling & recruitment<br>method                                                                                                                                                            |  |             |
| Inclusion and exclusion<br>criteria                                                                                                                                                         |  |             |
| Data sources<br>(primary/secondary data)                                                                                                                                                    |  |             |
| Notes:                                                                                                                                                                                      |  |             |
| <b>Cultural Safety</b>                                                                                                                                                                      |  | <i>Page</i> |
| Does the article apply a<br>definition of cultural safety,<br>competency or sensitivity<br>that includes<br>addressing/eliminating anti-<br>Indigenous racism, bias<br>and/or stereotyping? |  |             |
| Is this applied to the<br>intervention?                                                                                                                                                     |  |             |
| Does the article apply an<br>anti-racist focus in the<br>design and/or<br>implementation of cultural<br>safety, competency, etc.<br>interventions?                                          |  |             |
| Is it applied to the<br>intervention?                                                                                                                                                       |  |             |

## Supplementary File 2

|                                                                                                                                                                                                                                                                                                                                               |  |             |
|-----------------------------------------------------------------------------------------------------------------------------------------------------------------------------------------------------------------------------------------------------------------------------------------------------------------------------------------------|--|-------------|
| Notes:                                                                                                                                                                                                                                                                                                                                        |  |             |
| <b>Intervention detail</b>                                                                                                                                                                                                                                                                                                                    |  | <i>Page</i> |
| Type of intervention:<br>psychological, psychosocial,<br>educational and alternative<br>interventions                                                                                                                                                                                                                                         |  |             |
| Cultural component to<br>intervention                                                                                                                                                                                                                                                                                                         |  |             |
| <b>Brief Name:</b> name/phrase that<br>describes intervention                                                                                                                                                                                                                                                                                 |  |             |
| <b>Why:</b> describe rationale, goal,<br>theory or elements essential to<br>the intervention                                                                                                                                                                                                                                                  |  |             |
| <b>What - Materials:</b> Describe<br>any physical or informational<br>materials used in the<br>intervention, including those<br>provided to participants or<br>used in intervention delivery<br>or in training of intervention<br>providers. Provide information<br>on where the materials can be<br>accessed (e.g. online<br>appendix, URL). |  |             |
| <b>Procedures:</b> Describe each of<br>the procedures, activities,<br>and/or processes used in the<br>intervention, including any<br>enabling or support activities.                                                                                                                                                                          |  |             |
| <b>Who:</b> For each category of<br>intervention provider (e.g.<br>psychologist, nursing<br>assistant), describe their<br>expertise, background and any<br>specific training given.                                                                                                                                                           |  |             |
| <b>How:</b> Describe the modes of<br>delivery (e.g. face-to-face or<br>by some other mechanism,<br>such as internet or telephone)<br>of the intervention and<br>whether it was provided<br>individually or in a group.                                                                                                                        |  |             |
| <b>Where:</b> Describe the type(s)<br>of location(s) where the<br>intervention occurred,<br>including any necessary<br>infrastructure or relevant<br>features.                                                                                                                                                                                |  |             |
| <b>When and How:</b> Describe the<br>number of times the<br>intervention was delivered and                                                                                                                                                                                                                                                    |  |             |



## Supplementary File 2

|    |                                       |                   |                                   |
|----|---------------------------------------|-------------------|-----------------------------------|
| 1  | over what period of time              |                   |                                   |
| 2  | including the number of               |                   |                                   |
| 3  | sessions, their schedule, and         |                   |                                   |
| 4  | their duration, intensity or          |                   |                                   |
| 5  | dose.                                 |                   |                                   |
| 6  |                                       |                   |                                   |
| 7  | <b>Tailoring:</b> If the intervention |                   |                                   |
| 8  | was planned to be                     |                   |                                   |
| 9  | personalised, titrated or             |                   |                                   |
| 10 | adapted, then describe what,          |                   |                                   |
| 11 | why, when, and how.                   |                   |                                   |
| 12 | <b>Modifications:</b> If the          |                   |                                   |
| 13 | intervention was modified             |                   |                                   |
| 14 | during the course of the study,       |                   |                                   |
| 15 | describe the changes (what,           |                   |                                   |
| 16 | why, when, and how).                  |                   |                                   |
| 17 | <b>How well:</b> Planned: If          |                   |                                   |
| 18 | intervention adherence or             |                   |                                   |
| 19 | fidelity was assessed, describe       |                   |                                   |
| 20 | how and by whom, and if any           |                   |                                   |
| 21 | strategies were used to               |                   |                                   |
| 22 | maintain or improve fidelity,         |                   |                                   |
| 23 | describe them.                        |                   |                                   |
| 24 |                                       |                   |                                   |
| 25 | Actual: If intervention               |                   |                                   |
| 26 | adherence or fidelity was             |                   |                                   |
| 27 | assessed, describe the extent to      |                   |                                   |
| 28 | which the intervention was            |                   |                                   |
| 29 | delivered as planned.                 |                   |                                   |
| 30 | <b>Evaluation</b>                     |                   | <i>Page</i>                       |
| 31 | Type of study (RCT, case              |                   |                                   |
| 32 | study, etc.)                          |                   |                                   |
| 33 |                                       |                   |                                   |
| 34 | Brief methods overview                |                   |                                   |
| 35 |                                       |                   |                                   |
| 36 |                                       |                   |                                   |
| 37 | Data collection                       |                   |                                   |
| 38 | tools/methods                         |                   |                                   |
| 39 |                                       |                   |                                   |
| 40 | Outcome measure                       |                   |                                   |
| 41 | description (primary and              |                   |                                   |
| 42 | secondary)                            |                   |                                   |
| 43 |                                       |                   |                                   |
| 44 | Outcome specific to client            |                   |                                   |
| 45 | level change (y/n)                    |                   |                                   |
| 46 |                                       |                   |                                   |
| 47 | Outcome specific to                   |                   |                                   |
| 48 | clinician level change (y/n)          |                   |                                   |
| 49 |                                       |                   |                                   |
| 50 | Outcome specific to                   |                   |                                   |
| 51 | institutional level change            |                   |                                   |
| 52 | (y/n)                                 |                   |                                   |
| 53 | Notes:                                |                   |                                   |
| 54 |                                       |                   |                                   |
| 55 |                                       |                   |                                   |
| 56 | <b>Results</b>                        |                   |                                   |
| 57 |                                       | <i>individual</i> | <i>institutional</i> <i>other</i> |
| 58 |                                       |                   |                                   |
| 59 | Cultural safety outcome               |                   |                                   |
| 60 |                                       |                   |                                   |

Supplementary File 2

|   |                          |  |  |  |
|---|--------------------------|--|--|--|
| 1 | Other outcome            |  |  |  |
| 2 | <b>Other Information</b> |  |  |  |
| 3 |                          |  |  |  |
| 4 | Authors' conclusions     |  |  |  |

For peer review only

1  
2  
3  
4  
5  
6  
7  
8  
9  
10  
11  
12  
13  
14  
15  
16  
17  
18  
19  
20  
21  
22  
23  
24  
25  
26  
27  
28  
29  
30  
31  
32  
33  
34  
35  
36  
37  
38  
39  
40  
41  
42  
43  
44  
45  
46  
47  
48  
49  
50  
51  
52  
53  
54  
55  
56  
57  
58  
59  
60

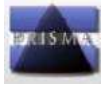

## PRISMA 2020 Checklist

| Section and Topic             | Item # | Checklist item                                                                                                                                                                                                                                                                                       | Location where item is reported |
|-------------------------------|--------|------------------------------------------------------------------------------------------------------------------------------------------------------------------------------------------------------------------------------------------------------------------------------------------------------|---------------------------------|
| <b>TITLE</b>                  |        |                                                                                                                                                                                                                                                                                                      |                                 |
| Title                         | 1      | Identify the report as a systematic review.                                                                                                                                                                                                                                                          | pg.1                            |
| <b>ABSTRACT</b>               |        |                                                                                                                                                                                                                                                                                                      |                                 |
| Abstract                      | 2      | See the PRISMA 2020 for Abstracts checklist.                                                                                                                                                                                                                                                         | pg. 1-2                         |
| <b>INTRODUCTION</b>           |        |                                                                                                                                                                                                                                                                                                      |                                 |
| Rationale                     | 3      | Describe the rationale for the review in the context of existing knowledge.                                                                                                                                                                                                                          | pg. 1-3                         |
| Objectives                    | 4      | Provide an explicit statement of the objective(s) or question(s) the review addresses.                                                                                                                                                                                                               | pg. 5                           |
| <b>METHODS</b>                |        |                                                                                                                                                                                                                                                                                                      |                                 |
| Eligibility criteria          | 5      | Specify the inclusion and exclusion criteria for the review and how studies were grouped for the syntheses.                                                                                                                                                                                          | pg. 6                           |
| Information sources           | 6      | Specify all databases, registers, websites, organisations, reference lists and other sources searched or consulted to identify studies. Specify the date when each source was last searched or consulted.                                                                                            | pg. 5-6                         |
| Search strategy               | 7      | Present the full search strategies for all databases, registers and websites, including any filters and limits used.                                                                                                                                                                                 | Supplement 1                    |
| Selection process             | 8      | Specify the methods used to decide whether a study met the inclusion criteria of the review, including how many reviewers screened each record and each report retrieved, whether they worked independently, and if applicable, details of automation tools used in the process.                     | pg. 6-7                         |
| Data collection process       | 9      | Specify the methods used to collect data from reports, including how many reviewers collected data from each report, whether they worked independently, any processes for obtaining or confirming data from study investigators, and if applicable, details of automation tools used in the process. | pg. 7                           |
| Data items                    | 10a    | List and define all outcomes for which data were sought. Specify whether all results that were compatible with each outcome domain in each study were sought (e.g. for all measures, time points, analyses), and if not, the methods used to decide which results to collect.                        | pg. 7-8                         |
|                               | 10b    | List and define all other variables for which data were sought (e.g. participant and intervention characteristics, funding sources). Describe any assumptions made about any missing or unclear information.                                                                                         | pg. 7-8                         |
| Study risk of bias assessment | 11     | Specify the methods used to assess risk of bias in the included studies, including details of the tool(s) used, how many reviewers assessed each study and whether they worked independently, and if applicable, details of automation tools used in the process.                                    | pg. 8-9; Supplemental 2         |
| Effect measures               | 12     | Specify for each outcome the effect measure(s) (e.g. risk ratio, mean difference) used in the synthesis or presentation of results.                                                                                                                                                                  | N/A                             |
| Synthesis methods             | 13a    | Describe the processes used to decide which studies were eligible for each synthesis (e.g. tabulating the study intervention characteristics and comparing against the planned groups for each synthesis (item #5)).                                                                                 | pg. 9                           |
|                               | 13b    | Describe any methods required to prepare the data for presentation or synthesis, such as handling of missing summary statistics, or data conversions.                                                                                                                                                | N/A                             |
|                               | 13c    | Describe any methods used to tabulate or visually display results of individual studies and syntheses.                                                                                                                                                                                               | N/A                             |
|                               | 13d    | Describe any methods used to synthesize results and provide a rationale for the choice(s). If meta-analysis was performed, describe the model(s), method(s) to identify the presence and extent of statistical heterogeneity, and software package(s) used.                                          | pg. 7                           |
|                               | 13e    | Describe any methods used to explore possible causes of heterogeneity among study results (e.g. subgroup analysis, meta-regression).                                                                                                                                                                 | N/A                             |
|                               | 13f    | Describe any sensitivity analyses conducted to assess robustness of the synthesized results.                                                                                                                                                                                                         | N/A                             |
| Reporting bias assessment     | 14     | Describe any methods used to assess risk of bias due to missing results in a synthesis (arising from reporting biases).                                                                                                                                                                              | N/A                             |



## PRISMA 2020 Checklist

| Section and Topic                              | Item # | Checklist item                                                                                                                                                                                                                                                                       | Location where item is reported |
|------------------------------------------------|--------|--------------------------------------------------------------------------------------------------------------------------------------------------------------------------------------------------------------------------------------------------------------------------------------|---------------------------------|
| Certainty assessment                           | 15     | Describe any methods used to assess certainty (or confidence) in the body of evidence for an outcome.                                                                                                                                                                                | N/A                             |
| <b>RESULTS</b>                                 |        |                                                                                                                                                                                                                                                                                      |                                 |
| Study selection                                | 16a    | Describe the results of the search and selection process, from the number of records identified in the search to the number of studies included in the review, ideally using a flow diagram.                                                                                         | pg. 9 and Figure 1              |
|                                                | 16b    | Cite studies that might appear to meet the inclusion criteria, but which were excluded, and explain why they were excluded.                                                                                                                                                          | pg. 9                           |
| Study characteristics                          | 17     | Cite each included study and present its characteristics.                                                                                                                                                                                                                            | pg. 9-14                        |
| Risk of bias in studies                        | 18     | Present assessments of risk of bias for each included study.                                                                                                                                                                                                                         | N/A                             |
| Results of individual studies                  | 19     | For all outcomes, present, for each study: (a) summary statistics for each group (where appropriate) and (b) an effect estimate and its precision (e.g. confidence/credible interval), ideally using structured tables or plots.                                                     | Table 1-3                       |
| Results of syntheses                           | 20a    | For each synthesis, briefly summarise the characteristics and risk of bias among contributing studies.                                                                                                                                                                               | pg. 14                          |
|                                                | 20b    | Present results of all statistical syntheses conducted. If meta-analysis was done, present for each the summary estimate and its precision (e.g. confidence/credible interval) and measures of statistical heterogeneity. If comparing groups, describe the direction of the effect. | N/A                             |
|                                                | 20c    | Present results of all investigations of possible causes of heterogeneity among study results.                                                                                                                                                                                       | N/A                             |
|                                                | 20d    | Present results of all sensitivity analyses conducted to assess the robustness of the synthesized results.                                                                                                                                                                           | N/A                             |
| Reporting biases                               | 21     | Present assessments of risk of bias due to missing results (arising from reporting biases) for each synthesis assessed.                                                                                                                                                              | N/A                             |
| Certainty of evidence                          | 22     | Present assessments of certainty (or confidence) in the body of evidence for each outcome assessed.                                                                                                                                                                                  | N/A                             |
| <b>DISCUSSION</b>                              |        |                                                                                                                                                                                                                                                                                      |                                 |
| Discussion                                     | 23a    | Provide a general interpretation of the results in the context of other evidence.                                                                                                                                                                                                    | pg. 14-17                       |
|                                                | 23b    | Discuss any limitations of the evidence included in the review.                                                                                                                                                                                                                      | pg. 14-17                       |
|                                                | 23c    | Discuss any limitations of the review processes used.                                                                                                                                                                                                                                | N/A                             |
|                                                | 23d    | Discuss implications of the results for practice, policy, and future research.                                                                                                                                                                                                       | pg. 16-17                       |
| <b>OTHER INFORMATION</b>                       |        |                                                                                                                                                                                                                                                                                      |                                 |
| Registration and protocol                      | 24a    | Provide registration information for the review, including register name and registration number, or state that the review was not registered.                                                                                                                                       | pg. 3                           |
|                                                | 24b    | Indicate where the review protocol can be accessed, or state that a protocol was not prepared.                                                                                                                                                                                       | pg. 23                          |
|                                                | 24c    | Describe and explain any amendments to information provided at registration or in the protocol.                                                                                                                                                                                      | N/A                             |
| Support                                        | 25     | Describe sources of financial or non-financial support for the review, and the role of the funders or sponsors in the review.                                                                                                                                                        | pg. 24                          |
| Competing interests                            | 26     | Declare any competing interests of review authors.                                                                                                                                                                                                                                   | pg. 24                          |
| Availability of data, code and other materials | 27     | Report which of the following are publicly available and where they can be found: template data collection forms; data extracted from included studies; data used for all analyses; analytic code; any other materials used in the review.                                           | pg. 23                          |

From: Page MJ, McKenzie JE, Bossuyt PM, et al. The PRISMA 2020 statement: an updated guideline for reporting systematic reviews. *BMJ* 2021;372:n71. doi:10.1136/bmj.n71

For more information, visit: [www.prisma-statement.org](http://www.prisma-statement.org).

# BMJ Open

## Systematic review of Indigenous Cultural Safety training interventions for health care professionals in Australia, Canada, New Zealand and the United States.

|                                 |                                                                                                                                                                                                                                                                                                                                                                                                                                                                                                                                                                                                                |
|---------------------------------|----------------------------------------------------------------------------------------------------------------------------------------------------------------------------------------------------------------------------------------------------------------------------------------------------------------------------------------------------------------------------------------------------------------------------------------------------------------------------------------------------------------------------------------------------------------------------------------------------------------|
| Journal:                        | <i>BMJ Open</i>                                                                                                                                                                                                                                                                                                                                                                                                                                                                                                                                                                                                |
| Manuscript ID                   | bmjopen-2023-073320.R2                                                                                                                                                                                                                                                                                                                                                                                                                                                                                                                                                                                         |
| Article Type:                   | Original research                                                                                                                                                                                                                                                                                                                                                                                                                                                                                                                                                                                              |
| Date Submitted by the Author:   | 14-Sep-2023                                                                                                                                                                                                                                                                                                                                                                                                                                                                                                                                                                                                    |
| Complete List of Authors:       | Hardy, Billie-Jo; University of Toronto - St George Campus, Dalla Lana School of Public Health; Unity Health Toronto, Well Living House, Li Ka Shing Knowledge Institute<br>Filipenko, Sam; Unity Health Toronto, Well Living House, Li Ka Shing Knowledge Institute<br>Smylie, Diane; Ontario Federation of Indigenous Friendship Centres<br>Ziegler, Carolyn; Unity Health Toronto, Health Sciences Library, St. Michael's Hospital<br>Smylie, Janet; Unity Health Toronto, Well Living House, Li Ka Shing Knowledge Institute; University of Toronto - St George Campus, Dalla Lana School of Public Health |
| <b>Primary Subject Heading</b>: | Medical education and training                                                                                                                                                                                                                                                                                                                                                                                                                                                                                                                                                                                 |
| Secondary Subject Heading:      | Health policy                                                                                                                                                                                                                                                                                                                                                                                                                                                                                                                                                                                                  |
| Keywords:                       | EDUCATION & TRAINING (see Medical Education & Training), Health Equity, Health policy < HEALTH SERVICES ADMINISTRATION & MANAGEMENT, Quality in health care < HEALTH SERVICES ADMINISTRATION & MANAGEMENT, Systematic Review                                                                                                                                                                                                                                                                                                                                                                                   |
|                                 |                                                                                                                                                                                                                                                                                                                                                                                                                                                                                                                                                                                                                |

SCHOLARONE™  
Manuscripts



I, the Submitting Author has the right to grant and does grant on behalf of all authors of the Work (as defined in the below author licence), an exclusive licence and/or a non-exclusive licence for contributions from authors who are: i) UK Crown employees; ii) where BMJ has agreed a CC-BY licence shall apply, and/or iii) in accordance with the terms applicable for US Federal Government officers or employees acting as part of their official duties; on a worldwide, perpetual, irrevocable, royalty-free basis to BMJ Publishing Group Ltd ("BMJ") its licensees and where the relevant Journal is co-owned by BMJ to the co-owners of the Journal, to publish the Work in this journal and any other BMJ products and to exploit all rights, as set out in our [licence](#).

The Submitting Author accepts and understands that any supply made under these terms is made by BMJ to the Submitting Author unless you are acting as an employee on behalf of your employer or a postgraduate student of an affiliated institution which is paying any applicable article publishing charge ("APC") for Open Access articles. Where the Submitting Author wishes to make the Work available on an Open Access basis (and intends to pay the relevant APC), the terms of reuse of such Open Access shall be governed by a Creative Commons licence – details of these licences and which [Creative Commons](#) licence will apply to this Work are set out in our licence referred to above.

Other than as permitted in any relevant BMJ Author's Self Archiving Policies, I confirm this Work has not been accepted for publication elsewhere, is not being considered for publication elsewhere and does not duplicate material already published. I confirm all authors consent to publication of this Work and authorise the granting of this licence.

1  
2  
3  
4 1 **Systematic review of Indigenous Cultural Safety training interventions for**  
5  
6 2 **healthcare professionals in Australia, Canada, New Zealand and the United**  
7  
8 3 **States.**  
9  
10 4

11  
12 5 **AUTHORS**  
13  
14

15 6 Billie-Jo Hardy, Assistant Professor<sup>1,2</sup>, Sam Filipenko, Research Manager<sup>2</sup>, Diane  
16  
17  
18 7 Smylie, Director<sup>3</sup>, Caroline Ziegler, Health Librarian<sup>4</sup> and Janet Smylie, Director<sup>1,2</sup>  
19  
20  
21 8

22  
23 9 <sup>1</sup>Dalla Lana School of Public Health, University of Toronto, Toronto, Canada  
24  
25

26 10 <sup>2</sup>Well Living House, Unity Health Toronto – St. Michael's Hospital, Toronto, Canada  
27  
28

29 11 <sup>3</sup>Ontario Federation of Indigenous Friendship Centres, Toronto, Canada  
30  
31

32 12 <sup>4</sup>Health Sciences Library, St. Michael's Hospital, Unity Health Toronto, Toronto, Canada  
33  
34 13

35  
36 14 **CORRESPONDING AUTHOR**  
37  
38

39 15 Billie-Jo Hardy, PhD.  
40  
41

42 16 Dalla Lana School of Public Health, University of Toronto,  
43  
44

45 17 155 College St., Room 403, Toronto, ON M5T 3M7, Canada  
46  
47

48 18 Telephone No.: +1-416-841-2709  
49  
50

51 19 [billiejo.hardy@utoronto.ca](mailto:billiejo.hardy@utoronto.ca)  
52  
53 20

54  
55 21 **KEYWORDS**  
56  
57  
58  
59  
60

1  
2  
3  
4  
5  
6  
7  
8  
9  
10  
11  
12  
13  
14  
15  
16  
17  
18  
19  
20  
21  
22  
23  
24  
25  
26  
27  
28  
29  
30  
31  
32  
33  
34  
35  
36  
37  
38  
39  
40  
41  
42  
43  
44  
45  
46  
47  
48  
49  
50  
51  
52  
53  
54  
55  
56  
57  
58  
59  
60

22 Indigenous health, Education & Training, Health Equity, Health Policy, Quality in Health

23 Care

24

25 **WORDCOUNT** 5019

26

27

28

29

For peer review only



1  
2  
3  
4 30 **ABSTRACT**

5  
6 31 Objective: To synthesize and appraise the design and impact of peer-reviewed  
7  
8  
9 32 evaluations of Indigenous cultural safety training programs and  
10  
11 33 workshops for healthcare workers in Australia, Canada, New  
12  
13  
14 34 Zealand, and/or the United States of America.

15  
16  
17 35 Design: Systematic review.

18  
19 36 Data Sources: Ovid Medline, Embase, PsycINFO, CINAHL, Cochrane Central  
20  
21  
22 37 Register of Controlled Trials, Cochrane Database of Systematic  
23  
24 38 Reviews, Bibliography of Indigenous Peoples in North America,  
25  
26  
27 39 Applied Social Sciences Index & Abstracts, ERIC (Education  
28  
29  
30 40 Resources Information Center), International Bibliography of the  
31  
32 41 Social Sciences, ProQuest Dissertations & Theses Global,  
33  
34  
35 42 Sociological Abstracts, and Web of Science's Social Sciences  
36  
37  
38 43 Citation Index and Science Citation Index from January 1, 2006 to  
39  
40  
41 44 May 12, 2022.

42  
43 45 Eligibility criteria Studies that evaluated the outcomes of educational interventions  
44  
45  
46 46 for selecting studies: designed to improve cultural safety, cultural competency,  
47  
48 47 and/or cultural awareness for non-Indigenous adult healthcare  
49  
50  
51 48 professionals in Canada, Australia, New Zealand, or the United  
52  
53  
54 49 States of America.

1  
2  
3  
4 50 Data Extraction and Our team of Indigenous and allied scientists tailored existing data

5  
6 51 extraction

7  
8  
9 52 Synthesis: and quality appraisal tools with input from Indigenous health service

10  
11 53 partners. We synthesized results using an iterative narrative

12  
13  
14 54 approach.

15  
16 55 Results: 2,442 unique titles and abstracts met screening criteria. 13 full-texts

17  
18  
19 56 met full inclusion and quality appraisal criteria. Study designs,

20  
21  
22 57 intervention characteristics, and outcome measures were

23  
24 58 heterogenous. Nine studies used mixed methods, two used

25  
26  
27 59 qualitative methods, and two used quantitative methods. Training

28  
29  
30 60 participants included nurses, family practice residents, specialized

31  
32 61 practitioners and providers serving specific subpopulations.

33  
34  
35 62 Theoretical frameworks and pedagogical approaches varied across

36  
37  
38 63 programs, which contained overlapping course content. Study

39  
40 64 outcomes were primarily learner-oriented, and focused on self-

41  
42  
43 65 reported changes in knowledge, awareness, beliefs, attitudes, and/or

44  
45 66 the confidence and skills to provide care for Indigenous peoples. The

46  
47  
48 67 involvement of local Indigenous communities in the development,

49  
50  
51 68 implementation, and evaluation of the interventions was limited.

52  
53 69 Conclusion: There is limited evidence regarding the effectiveness of specific

54  
55  
56 70 content and approaches to cultural safety training on improving non-

1  
2  
3  
4 71 Indigenous health professionals' knowledge of and skills to deliver  
5  
6 72 quality, non-discriminatory care to Indigenous patients. Future  
7  
8  
9 73 research is needed that advances the methodological rigour of  
10  
11 74 training evaluations, is focused on observed clinical outcomes, and  
12  
13  
14 75 is better aligned to local, regional, and/or national Indigenous  
15  
16 76 priorities and needs.  
17  
18

19 77

22 78 **SYSTEMATIC REVIEW REGISTRATION** Not Registered

25 79

## 28 80 **STRENGTHS AND LIMITATIONS OF THIS STUDY**

30 81

- 32  
33 82 • Our systematic review built upon existing tailored Indigenous systematic review  
34  
35 83 methodologies to implement a method aimed at optimizing relevance for Indigenous  
36  
37  
38 84 peoples by ensuring that their expertise and knowledge was centred throughout the  
39  
40  
41 85 project.  
42  
43 86 • Our systematic review applied data extraction and appraisal tools that were designed  
44  
45 87 and implemented in partnership with Indigenous community partners.  
46  
47  
48 88 • The review is limited to ICS programs with evaluations that have been published in  
49  
50  
51 89 the peer-review and grey literature and as such, may not have captured the true  
52  
53  
54  
55  
56  
57  
58  
59  
60

1  
2  
3  
4 90 breadth of existing Indigenous cultural safety training programs and related  
5  
6 91 evaluations.

- 7  
8  
9 92 • The review is limited to interventions directed towards healthcare providers.  
10  
11 93

## 14 94 INTRODUCTION

15  
16  
17 95 Colonization has long been recognized by Indigenous peoples from around the world as  
18  
19 96 a cross-cutting and foundational determinant of Indigenous/non-Indigenous health  
20  
21 97 disparities.(1) More recently, a series of apologies by world leaders has enhanced general  
22  
23 98 societal awareness of anti-Indigenous colonial injustices, abuses, and harms.(2-5)  
24  
25 99 Simultaneously, a rapidly growing body of academic scholarship clearly demonstrates  
26  
27 100 ongoing, widespread, and harmful anti-Indigenous colonial policies and practices that are  
28  
29 101 rooted in racist ideologies of white supremacy.(6-12)  
30  
31  
32  
33  
34

35 102  
36  
37 103 Common manifestations of persistent colonialism include the emergence of deeply rooted  
38  
39 104 negative anti-Indigenous stereotyping and assumptions in micro-level social interactions,  
40  
41 105 organizational design, and social architecture.(10, 13, 14) In healthcare contexts, this  
42  
43 106 includes: racist contamination of the healthcare provider-Indigenous patient interface;  
44  
45 107 organizational level barriers to equitable Indigenous health services access; and  
46  
47 108 Indigenous/settler imbalances in the distribution of health and social resources.(10, 13,  
48  
49 109 15) Social media and linked public reporting have begun to expose the life-threatening  
50  
51  
52  
53  
54  
55  
56  
57  
58  
59  
60

1  
2  
3  
4 110 severity of explicit attitudinal anti-Indigenous racism but there can be resistance to  
5  
6 111 acknowledging the underlying challenges of ongoing implicit and system-level failures.  
7  
8  
9 112 For example, Joyce Echequan was able to record the anti-Indigenous racist  
10  
11 113 disparagement she experienced from healthcare staff when seeking treatment for a life-  
12  
13  
14 114 threatening illness at the Lanaudiere hospital in Joliette, Quebec immediately prior to her  
15  
16 115 death.(16) The behaviours of the individual providers were widely regarded as grossly  
17  
18  
19 116 unacceptable following media reporting. However, the Premier of Quebec refused to  
20  
21  
22 117 acknowledge the role of systemic racism in Joyce's death.(17)  
23

24 118  
25  
26  
27 119 Multiple studies have demonstrated that implicit race preference bias is common among  
28  
29  
30 120 healthcare providers,(18) even when they explicitly express anti-racist values and  
31  
32 121 attitudes.(19) Further, implicit race preference bias has been linked to differential  
33  
34  
35 122 application of clinical practice guidelines, with non-adherence disproportionately  
36  
37 123 impacting socially excluded racialized and ethnic patient populations.(20)  
38

39  
40 124  
41  
42  
43 125 Not surprisingly, given the broad scope and injurious impacts of anti-Indigenous racism,  
44  
45 126 its interruption in healthcare contexts has emerged as a priority for Indigenous and allied  
46  
47  
48 127 policymakers, practitioners, and researchers. Of the Truth and Reconciliation  
49  
50  
51 128 Commission of Canada's seven Calls to Action in the domain of health, two address the  
52  
53 129 need to provide "cultural competency" training for healthcare providers.(21) These policy  
54  
55  
56 130 recommendations have been accompanied by a rapid growth of interventions designed  
57  
58  
59

1  
2  
3  
4 131 to interrupt anti-Indigenous racism, primarily through educational interventions for  
5  
6 132 healthcare providers and trainees.(22,23) Upon engagement with this literature,(22) it  
7  
8  
9 133 became apparent to our team that the approach, content, and evaluations of existing  
10  
11 134 cultural competency trainings vary widely. It was unclear which training approaches and  
12  
13  
14 135 strategies were most effective, especially with respect to improving disparities in clinical  
15  
16 136 outcomes.

17  
18  
19 137  
20  
21  
22 138 In order to address these knowledge gaps, we conducted a systematic literature review  
23  
24 139 focused on the design and impacts of existing Indigenous cultural safety and competency  
25  
26  
27 140 training interventions. The primary aim of this review was to identify, appraise and  
28  
29  
30 141 synthesize the design and impacts of these educational interventions on non-Indigenous  
31  
32 142 healthcare professionals' knowledge, attitudes, and practices. The secondary aim was  
33  
34  
35 143 to investigate whether specific training approaches, strategies, formats, or educational  
36  
37 144 content were more successful, and if yes, for whom and in what ways. To help manage  
38  
39  
40 145 heterogeneity, we restricted this review to Indigenous-specific educational interventions  
41  
42  
43 146 in Australia, Canada, New Zealand, and the United States. These globally affluent  
44  
45 147 countries share both relatively well-resourced health and social service systems and  
46  
47  
48 148 history of European colonization that continues to negatively impact the health and  
49  
50  
51 149 wellbeing of First Peoples, including equitable access to these service systems.

52  
53 150  
54  
55  
56  
57  
58  
59  
60

1  
2  
3  
4 151 **METHODS**

5  
6 152 The Preferred Reporting Items for Systematic Reviews and Meta-Analyses (PRISMA)

7  
8  
9 153 2020 statement was used to guide our literature review and reporting.(24) Supplementary

10  
11 154 Figure 1 documents the process of article screening for inclusion in our analysis. Tables

12  
13  
14 155 1 and 2 summarize key aspects of the included studies: intervention content; participants;

15  
16  
17 156 evaluation methods; and study outcomes.

18  
19 157  
20  
21  
22  
23  
24  
25  
26  
27  
28  
29  
30  
31  
32  
33  
34  
35  
36  
37  
38  
39  
40  
41  
42  
43  
44  
45  
46  
47  
48  
49  
50  
51  
52  
53  
54  
55  
56  
57  
58  
59  
60

**Table 1. Summary of Interventions**

| Author(s)                          | Year | Country     | Intervention                                                                 | Content Delivery                                                                                               | Setting  | Core Curriculum Topics                                                                                                                                                                                                                                                                                                                                | Participants                                                           |
|------------------------------------|------|-------------|------------------------------------------------------------------------------|----------------------------------------------------------------------------------------------------------------|----------|-------------------------------------------------------------------------------------------------------------------------------------------------------------------------------------------------------------------------------------------------------------------------------------------------------------------------------------------------------|------------------------------------------------------------------------|
| Barajas J.                         | 2021 | USA         | 10 minute online PowerPoint presentation and YouTube video                   | Online module(s)                                                                                               | Online   | Cultural knowledge, spirituality, and beliefs; professional practice issues; interpersonal communication skills                                                                                                                                                                                                                                       | Emergency Department healthcare providers and staff (n=6)              |
| Barnabe C., et al.                 | 2021 | Canada      | Phase I: half-day workshop, and Phase II: full day workshop (6 months later) | Online module(s); interactive group discussions, reflections, and experiential exercises                       | Clinical | Determinants of Indigenous health; oppressive and racist policies, colonization and white racial privilege; specific health focus                                                                                                                                                                                                                     | Rheumatologists (n=34)                                                 |
| Brewer K., McCann C., & Harwood M. | 2020 | New Zealand | 2 self-paced online modules                                                  | Online module(s); self-learning tools; personal reflections                                                    | Online   | Family structures, kinship, and responsibilities; cultural knowledge, spirituality, and beliefs; past policies and practices; determinants of Indigenous health; health disparities; professional practice issues; oppressive and racist policies, colonization and white racial privilege; interpersonal communication skills; specific health focus | Speech Language Therapists (n=11)                                      |
| Chapman R., Martin C., & Smith T.  | 2014 | Australia   | 3 x 2hour workshops over 6 weeks                                             | Didactic lecture; interactive group discussions, reflections, and experiential exercises; personal reflections | Clinical | Cultural knowledge and ideology                                                                                                                                                                                                                                                                                                                       | Emergency Department: nursing, clinical and allied health staff (n=48) |
| Crowshoe L., et al.                | 2018 | Canada      | Full day (8 hours) workshop                                                  | Interactive group discussions, reflections, and experiential exercises                                         | Clinical | Determinants of Indigenous health; professional practice issues; oppressive and racist policies, colonization and white racial privilege; interpersonal communication skills                                                                                                                                                                          | Family physicians and Allied Health Professionals (n=32)               |



|    |                                      |      |           |                                                                                                                     |                                                                                                                |                      |                                                                                                                                                                                                                                                                                                                                         |                                                                                                                            |
|----|--------------------------------------|------|-----------|---------------------------------------------------------------------------------------------------------------------|----------------------------------------------------------------------------------------------------------------|----------------------|-----------------------------------------------------------------------------------------------------------------------------------------------------------------------------------------------------------------------------------------------------------------------------------------------------------------------------------------|----------------------------------------------------------------------------------------------------------------------------|
| 1  | Hinton R., et al.                    | 2014 | Australia | 3 full-day workshops over 2 months                                                                                  | Didactic lecture; interactive group discussions, reflections, and experiential exercises; self-learning tools  | Clinical             | Specific health focus                                                                                                                                                                                                                                                                                                                   | Clinical and Allied Health Staff (n=21)                                                                                    |
| 2  |                                      |      |           |                                                                                                                     |                                                                                                                |                      |                                                                                                                                                                                                                                                                                                                                         |                                                                                                                            |
| 3  |                                      |      |           |                                                                                                                     |                                                                                                                |                      |                                                                                                                                                                                                                                                                                                                                         |                                                                                                                            |
| 4  |                                      |      |           |                                                                                                                     |                                                                                                                |                      |                                                                                                                                                                                                                                                                                                                                         |                                                                                                                            |
| 5  |                                      |      |           |                                                                                                                     |                                                                                                                |                      |                                                                                                                                                                                                                                                                                                                                         |                                                                                                                            |
| 6  | Hulko W., et al.                     | 2021 | Canada    | 8-10 hours of online training over 8-10 weeks, and a full day Storytelling Session and Talking Circle with an Elder | Online module(s); story telling and talking circles; knowledge quiz; personal reflections                      | Online and classroom | Indigenous diversity; family structures, kinship, and responsibilities; cultural knowledge, spirituality, and beliefs; past policies and practices; determinants of Indigenous health; health disparities; professional practice issues; oppressive and racist policies, colonization and white racial privilege; specific health focus | Nurses (n=38)                                                                                                              |
| 7  |                                      |      |           |                                                                                                                     |                                                                                                                |                      |                                                                                                                                                                                                                                                                                                                                         |                                                                                                                            |
| 8  |                                      |      |           |                                                                                                                     |                                                                                                                |                      |                                                                                                                                                                                                                                                                                                                                         |                                                                                                                            |
| 9  |                                      |      |           |                                                                                                                     |                                                                                                                |                      |                                                                                                                                                                                                                                                                                                                                         |                                                                                                                            |
| 10 |                                      |      |           |                                                                                                                     |                                                                                                                |                      |                                                                                                                                                                                                                                                                                                                                         |                                                                                                                            |
| 11 |                                      |      |           |                                                                                                                     |                                                                                                                |                      |                                                                                                                                                                                                                                                                                                                                         |                                                                                                                            |
| 12 |                                      |      |           |                                                                                                                     |                                                                                                                |                      |                                                                                                                                                                                                                                                                                                                                         |                                                                                                                            |
| 13 |                                      |      |           |                                                                                                                     |                                                                                                                |                      |                                                                                                                                                                                                                                                                                                                                         |                                                                                                                            |
| 14 |                                      |      |           |                                                                                                                     |                                                                                                                |                      |                                                                                                                                                                                                                                                                                                                                         |                                                                                                                            |
| 15 | Kerrigan V., et al.                  | 2020 | Australia | Full day (7 hours) workshop                                                                                         | Didactic lecture; interactive group discussions, reflections, and experiential exercises                       | Clinical             | Cultural knowledge, spirituality, and beliefs; past policies and practices; professional practice issues; oppressive and racist policies, colonization and white racial privilege; interpersonal communication skills                                                                                                                   | Hospital staff (n=621)                                                                                                     |
| 16 |                                      |      |           |                                                                                                                     |                                                                                                                |                      |                                                                                                                                                                                                                                                                                                                                         |                                                                                                                            |
| 17 |                                      |      |           |                                                                                                                     |                                                                                                                |                      |                                                                                                                                                                                                                                                                                                                                         |                                                                                                                            |
| 18 |                                      |      |           |                                                                                                                     |                                                                                                                |                      |                                                                                                                                                                                                                                                                                                                                         |                                                                                                                            |
| 19 |                                      |      |           |                                                                                                                     |                                                                                                                |                      |                                                                                                                                                                                                                                                                                                                                         |                                                                                                                            |
| 20 |                                      |      |           |                                                                                                                     |                                                                                                                |                      |                                                                                                                                                                                                                                                                                                                                         |                                                                                                                            |
| 21 |                                      |      |           |                                                                                                                     |                                                                                                                |                      |                                                                                                                                                                                                                                                                                                                                         |                                                                                                                            |
| 22 | Kerrigan V., et al.                  | 2022 | Australia | 7 x 18-20min podcasts (1/week)                                                                                      | Online podcasts; diary entries                                                                                 | Online               | Counterstories; interpersonal communication skills; social justice                                                                                                                                                                                                                                                                      | Physicians (n=16)                                                                                                          |
| 23 |                                      |      |           |                                                                                                                     |                                                                                                                |                      |                                                                                                                                                                                                                                                                                                                                         |                                                                                                                            |
| 24 |                                      |      |           |                                                                                                                     |                                                                                                                |                      |                                                                                                                                                                                                                                                                                                                                         |                                                                                                                            |
| 25 | Liaw S-T., et al.                    | 2015 | Australia | Half day workshop, case study toolkit, and cultural mentors                                                         | Workshop; cultural mentor; self-learning tools                                                                 | Clinical             | Interpersonal communication skills; cultural respect                                                                                                                                                                                                                                                                                    | Clinical practice - solo physician/groups (n=10)                                                                           |
| 26 |                                      |      |           |                                                                                                                     |                                                                                                                |                      |                                                                                                                                                                                                                                                                                                                                         |                                                                                                                            |
| 27 |                                      |      |           |                                                                                                                     |                                                                                                                |                      |                                                                                                                                                                                                                                                                                                                                         |                                                                                                                            |
| 28 | Liaw S-T., et al.                    | 2019 | Australia | Half day workshop, case study toolkit, and cultural mentor                                                          | Workshop; cultural mentor; self-learning tools                                                                 | Clinical             | Interpersonal communication skills; cultural respect                                                                                                                                                                                                                                                                                    | General practice clinics (n=56); general practitioner physicians (n=334); practice managers (n=56); practice nurses (n=93) |
| 29 |                                      |      |           |                                                                                                                     |                                                                                                                |                      |                                                                                                                                                                                                                                                                                                                                         |                                                                                                                            |
| 30 |                                      |      |           |                                                                                                                     |                                                                                                                |                      |                                                                                                                                                                                                                                                                                                                                         |                                                                                                                            |
| 31 |                                      |      |           |                                                                                                                     |                                                                                                                |                      |                                                                                                                                                                                                                                                                                                                                         |                                                                                                                            |
| 32 | Sauvé A., Cappelletti A., & Murji L. | 2022 | Canada    | Half-day in-person simulation workshop                                                                              | Simulation training                                                                                            | Clinical             | Determinants of Indigenous health; professional practice issues; oppressive and racist policies, colonization and white racial privilege                                                                                                                                                                                                | Physicians (Family Medicine Residents) (n=29)                                                                              |
| 33 |                                      |      |           |                                                                                                                     |                                                                                                                |                      |                                                                                                                                                                                                                                                                                                                                         |                                                                                                                            |
| 34 |                                      |      |           |                                                                                                                     |                                                                                                                |                      |                                                                                                                                                                                                                                                                                                                                         |                                                                                                                            |
| 35 |                                      |      |           |                                                                                                                     |                                                                                                                |                      |                                                                                                                                                                                                                                                                                                                                         |                                                                                                                            |
| 36 |                                      |      |           |                                                                                                                     |                                                                                                                |                      |                                                                                                                                                                                                                                                                                                                                         |                                                                                                                            |
| 37 | Wheeler A., et al.                   | 2021 | Australia | 1.5 hour online module, and a full day in-person workshop (2-3 weeks later)                                         | Online module(s); interactive group discussions, reflections, and experiential exercises; personal reflections | Online and classroom | Health disparities; professional practice issues; interpersonal communication skills                                                                                                                                                                                                                                                    | Pharmacists (n=39)                                                                                                         |
| 38 |                                      |      |           |                                                                                                                     |                                                                                                                |                      |                                                                                                                                                                                                                                                                                                                                         |                                                                                                                            |
| 39 |                                      |      |           |                                                                                                                     |                                                                                                                |                      |                                                                                                                                                                                                                                                                                                                                         |                                                                                                                            |
| 40 |                                      |      |           |                                                                                                                     |                                                                                                                |                      |                                                                                                                                                                                                                                                                                                                                         |                                                                                                                            |
| 41 |                                      |      |           |                                                                                                                     |                                                                                                                |                      |                                                                                                                                                                                                                                                                                                                                         |                                                                                                                            |
| 42 |                                      |      |           |                                                                                                                     |                                                                                                                |                      |                                                                                                                                                                                                                                                                                                                                         |                                                                                                                            |
| 43 |                                      |      |           |                                                                                                                     |                                                                                                                |                      |                                                                                                                                                                                                                                                                                                                                         |                                                                                                                            |
| 44 |                                      |      |           |                                                                                                                     |                                                                                                                |                      |                                                                                                                                                                                                                                                                                                                                         |                                                                                                                            |
| 45 |                                      |      |           |                                                                                                                     |                                                                                                                |                      |                                                                                                                                                                                                                                                                                                                                         |                                                                                                                            |
| 46 |                                      |      |           |                                                                                                                     |                                                                                                                |                      |                                                                                                                                                                                                                                                                                                                                         |                                                                                                                            |
| 47 |                                      |      |           |                                                                                                                     |                                                                                                                |                      |                                                                                                                                                                                                                                                                                                                                         |                                                                                                                            |

**Table 2. Summary of Evaluation and Outcomes**

| Citation                                 | Study design                       | Method                                                                                                                                  | Tool(s)                                                                                                                                 | Reported Outcome(s)                                                                                                                                                    |
|------------------------------------------|------------------------------------|-----------------------------------------------------------------------------------------------------------------------------------------|-----------------------------------------------------------------------------------------------------------------------------------------|------------------------------------------------------------------------------------------------------------------------------------------------------------------------|
| Barajas J. 2021.                         | Mixed methods, quality improvement | Post-survey                                                                                                                             | 7 dichotomous (yes/no); 2 open-ended questions                                                                                          | Positive impact on insights, knowledge, and anticipated behaviour change.                                                                                              |
| Barnabe C., et al. 2021.                 | Mixed methods                      | Pre- (1 week pre-intervention) and post-survey (3 months post-intervention). Satisfaction survey (1 week post-intervention)             | Social Cultural Confidence in Care Scale (SCCCS); free-text questions; Experience survey                                                | Significant change in knowledge, skills, and approach to social and cultural factors. Intervention was reported as being relevant and meeting expectations.            |
| Brewer K., McCann C., & Harwood M. 2020. | Qualitative longitudinal           | Post-survey. Follow-up interview (6 months post-intervention)                                                                           | Course feedback; structured interviews                                                                                                  | Major themes of "putting it into practice" and "keeping it at the forefront."                                                                                          |
| Chapman R., Martin C., & Smith T. 2014.  | Quantitative                       | Pre- and post-survey                                                                                                                    | Area human resources development/population health survey of participation in Aboriginal awareness training workshop                    | Some change of perceptions towards ATSI peoples. Small effect on familiarity. No effect on attitudes.                                                                  |
| Crowshoe L., et al. 2018.                | Mixed methods                      | Pre- (1 week pre-intervention) and post-survey (3 months post-intervention). Participant observations. Intervention satisfaction survey | Onsite satisfaction evaluation; observations of participant engagement with content on day; online survey                               | Significant improvement in knowledge, skills, awareness, confidence, and approach to patient care. Strong agreement that the workshop met objectives and expectations. |
| Hinton R., et al. 2014.                  | Mixed methods, action-oriented     | File audit                                                                                                                              | 2009 vs. 2011 audit of inpatient files                                                                                                  | Some improvements to the quality of recovery-oriented care, as shown through an increase in recording client social history, family issues, and cultural factors.      |
| Hulko W., et al. 2021.                   | Mixed methods, community-based     | Pre- and post -surveys, knowledge quizzes, and case study care planning. Talking Circles.                                               | Approaches to Dementia Questionnaire; Indigenous Cultural Competency Knowledge Quiz; care plans for "Alice;" Talking Circle transcripts | Improvement in the knowledge, skills, and values of the nurse participants. Storytelling sessions were reported as being effective at building capacity.               |

|                                            |                                   |                                                                                                          |                                                                                                                                                                 |                                                                                                                                                                                                                                                                     |
|--------------------------------------------|-----------------------------------|----------------------------------------------------------------------------------------------------------|-----------------------------------------------------------------------------------------------------------------------------------------------------------------|---------------------------------------------------------------------------------------------------------------------------------------------------------------------------------------------------------------------------------------------------------------------|
| Kerrigan V., et al. 2020.                  | Mixed methods                     | Post-survey                                                                                              | Likert-scale questions on Quality of Training; free-text questions                                                                                              | Provided good to excellent information provided on all topics. Participants wanted further and more specific cultural education opportunities.                                                                                                                      |
| Kerrigan V., et al. 2022.                  | Qualitative, participatory action | Qualitative journal entries. Post-intervention interviews                                                | Weekly reflections; feedback interviews                                                                                                                         | Raised the critical consciousness of participants leading to self-reported attitudinal and behaviour change.                                                                                                                                                        |
| Liaw S-T., et al. 2015.                    | Mixed methods, pragmatic          | Pre- and post-surveys and patient file audits (6 months post-intervention). Post-intervention interviews | Cultural Quotient questionnaire; file audit of health checks and clinical risk factors managed; follow-up interviews with staff, cultural mentors, and patients | Clinical practices improved their readiness to provide culturally appropriate care. Individual clinic staff improved their cultural strategic thinking.                                                                                                             |
| Liaw S-T., et al. 2019.                    | Mixed methods, cluster RCT        | File audit. Pre- and post-survey (12 months post-intervention)                                           | Cultural Quotient questionnaire; audit of rates of healthcare claims and chronic disease risk factors.                                                          | No significant change in Indigenous health check rates or cultural quotient scores.                                                                                                                                                                                 |
| Sauvé A., Cappelletti A., & Murji L. 2022. | Quantitative                      | Pre- and post-survey                                                                                     | abridged Scale of Ethnocultural Empathy (aSEE)                                                                                                                  | Significant increase in empathy, knowledge of Indigenous SDOH, and motivation to engage with Indigenous patients in a culturally safe manner.                                                                                                                       |
| Wheeler A., et al. 2021.                   | Mixed methods                     | Pre- and post-survey. Training acceptability survey                                                      | Cultural Capability Measurement Tool (CCMT); additional adapted questions; acceptability survey                                                                 | Significant improvement in cultural capability, confidence, and skills. Significant change in motivation to improve health outcomes for Indigenous patients and reduce barriers. Acceptability of the intervention and perceived value-add to participant practice. |

## 160 **Search strategy**

161 Consistent with the search methods outlined in the Cochrane Handbook for systematic  
162 reviews,(25) an Information Specialist (CZ) conducted database searches in Ovid  
163 Medline, Embase, PsycINFO, CINAHL, Cochrane Central Register of Controlled Trials,  
164 Cochrane Database of Systematic Reviews, Bibliography of Indigenous People in North  
165 America, Applied Social Sciences Index & Abstracts, ERIC (Education Resources  
166 Information Center), International Bibliography of the Social Sciences, ProQuest  
167 Dissertations & Theses Global, Sociological Abstracts, and Web of Science's Social  
168 Sciences Citation Index and Science Citation Index. Search strategies were adapted for  
169 each database and used a comprehensive combination of subject headings and  
170 keywords for the concepts of Indigenous peoples, cultural competence and health  
171 professionals' education. Databases were searched for English language records from  
172 2006 to May 12, 2022 (based upon the emergence of literature describing and evaluating  
173 Indigenous cultural safety interventions) and uploaded into Colandr.(26) The reference  
174 lists of seminal texts and review articles were then reviewed for additional records. An  
175 additional 3 articles were identified for study inclusion. For the detailed search strategies  
176 see Supplementary Figure 2.

## 178 **Study screening**

179 Two independent reviewers screened all title and abstracts for full-text review using the  
180 following inclusion criteria:

1  
2  
3  
4 181 (1) Study specific to Indigenous contexts in what is now known as Australia, Canada,  
5  
6 182 New Zealand, and/or the United States of America;

7  
8  
9 183 (2) Study describes educational interventions (workshops, training, coursework,  
10  
11 184 community visits, etc.) designed/implemented to improve cultural safety, cultural  
12  
13  
14 185 competency, and/or cultural awareness;

15  
16  
17 186 (3) Educational intervention focused on a majority of non-Indigenous adult participants  
18  
19 187 healthcare professionals who provide services (e.g., health or social services) to  
20  
21  
22 188 Indigenous peoples.

23  
24 189  
25  
26  
27 190 Full-texts were obtained for all studies that passed this title and abstract screening stage  
28  
29  
30 191 and in the event that there was not enough information in the abstract to determine  
31  
32 192 inclusion according to these three criteria.

33  
34  
35 193  
36  
37 194 Three researchers collaborated on full-text screening and further eliminated articles that  
38  
39  
40 195 upon full reading, did not meet the primary inclusion criteria and two secondary inclusion  
41  
42  
43 196 criteria: (i) detailed information about the educational intervention's design and  
44  
45 197 implementation; (ii) defined evaluation outcomes. As per our inclusion criteria, we  
46  
47  
48 198 excluded studies in which the majority of the learners were Indigenous and/or the focus  
49  
50  
51 199 of the intervention was at the organizational versus healthcare provider level. We  
52  
53 200 additionally excluded train-the-trainer interventions in which the participants were not  
54  
55  
56  
57  
58  
59  
60

1  
2  
3  
4 201 directly providing health services. Our two-phased screening protocol is available as  
5  
6 202 Supplementary File 1.  
7

8  
9 203

#### 10 11 204 **Data Abstraction and Quality Appraisal**

12  
13  
14 205 Three researchers collaborated on data abstraction across the following categories:  
15  
16 206 study methods (design, evaluation methods and tools, participants,  
17  
18  
19 207 sampling/recruitment), study population, sampling and recruitment methods, educational  
20  
21  
22 208 intervention design (pedagogy, content, modifications) and outcomes (individual- and  
23  
24 209 system-level).

25  
26  
27 210 Two independent reviewers completed preliminary data abstraction and the lead author  
28  
29  
30 211 (BJH) subsequently reviewed all abstractions and finalized Tables 1-4. The lead and  
31  
32 212 senior authors (BJH, JS) independently appraised methodological quality using a tailored  
33  
34  
35 213 version of the Well Living House quality appraisal tool (WLHQAT)(27-29) (Supplementary  
36  
37 214 Figure 3) and subsequently met to discuss and reach consensus on scores (Table 3).  
38  
39  
40 215 WLHQAT includes three equally weighted assessment domains: local Indigenous  
41  
42 216 community relevance of methods; rigor and validity; and strength of evidence and has a  
43  
44  
45 217 maximum total score of 12. Studies with a total score of <7 were not included in the full  
46  
47  
48 218 synthesis. The interdisciplinary nature of included studies added complexity to the quality  
49  
50  
51 219 appraisal, in that the research team, study design, concepts and priorities, data collection,  
52  
53 220 and measures were wide-ranging.  
54

55  
56 221  
57  
58  
59  
60

222

223

224

**Table 3: Well Living House Quality Appraisal Scores**

| Citation                                   | Scoring Range<br>1-3 / 4-6 / 7-9 / 10-12 |
|--------------------------------------------|------------------------------------------|
| Barajas J. 2021                            | 7-9                                      |
| Barnabe C., et al. 2021.                   | 7-9                                      |
| Brewer K., McCann C., & Harwood M. 2020.   | 7-9                                      |
| Chapman R., Martin C., & Smith T. 2014.    | 7-9                                      |
| Crowshoe L., et al., 2018.                 | 7-9                                      |
| Delbridge R., et al., 2018                 | 4-6                                      |
| Durey A., et al., 2017                     | 4-6                                      |
| Hinton R., et al. 2014.                    | 7-9                                      |
| Hulko W., et al. 2021.                     | 7-9                                      |
| Kerrigan V., et al., 2020.                 | 7-9                                      |
| Kerrigan V., et al., 2022.                 | 7-9                                      |
| Liaw S-T., et al. 2015.                    | 10-12                                    |
| Liaw S-T., et al. 2019.                    | 10-12                                    |
| McMichael B., et al., 2019                 | 4-6                                      |
| Sauvé A., Cappelletti A., & Murji L. 2022. | 7-9                                      |
| Wheeler A., et al. 2021.                   | 7-9                                      |

225

**Table 4 : Summary of Indigenous Involvement in Curriculum Development, Curriculum Delivery and Evaluation/Research Activities**

| Citation                                   | Study Design | Curriculum Development | Curriculum Delivery | Curriculum Evaluation | Study Analysis | Dissemination | Positionality |
|--------------------------------------------|--------------|------------------------|---------------------|-----------------------|----------------|---------------|---------------|
| Barajas J. 2021.                           | Yes          | Yes                    | None listed         | Yes                   | Yes            | Yes           | Yes           |
| Barnabe C., et al. 2021.                   | Yes          | Yes                    | Yes                 | Yes                   | Yes            | Yes           | Yes           |
| Brewer K., McCann C., & Harwood M. 2020.   | None listed  | Yes                    | None listed         | None listed           | None listed    | Yes           | None listed   |
| Chapman R., Martin C., & Smith T. 2014.    | None listed  | None listed            | Yes                 | None listed           | None listed    | None listed   | None listed   |
| Crowshoe L., et al., 2018.                 | Yes          | Yes                    | Yes                 | Yes                   | Yes            | Yes           | Limited       |
| Hinton R., et al. 2014.                    | None listed  | None listed            | None listed         | None listed           | None listed    | None listed   | None listed   |
| Hulko W., et al. 2021.                     | Yes          | Yes                    | Yes                 | Yes                   | Yes            | Yes           | Yes           |
| Kerrigan V., et al., 2020.                 | Yes          | Yes                    | Yes                 | Yes                   | Yes            | Yes           | Yes           |
| Kerrigan V., et al., 2022.                 | Yes          | Yes                    | Yes                 | Yes                   | Yes            | Yes           | Yes           |
| Liaw S-T., et al. 2015.                    | None listed  | Yes                    | Limited             | Yes                   | None listed    | None listed   | None listed   |
| Liaw S-T., et al. 2019.                    | None listed  | Yes                    | Limited             | Yes                   | None listed    | None listed   | None listed   |
| Sauvé A., Cappelletti A., & Murji L. 2022. | Yes          | Yes                    | Yes                 | None listed           | None listed    | None listed   | None listed   |
| Wheeler A., et al. 2021.                   | Yes          | Yes                    | Yes                 | Yes                   | None listed    | None listed   | None listed   |



1  
2  
3  
4 2275  
6 228 **Synthesis**

7  
8  
9 229 We applied an iterative narrative approach to our synthesis.(30) This method was a good  
10  
11 230 fit with the heterogeneity of study designs and outcomes and our secondary aim to  
12  
13  
14 231 understand which specific training approaches were impactful for whom and in what  
15  
16 232 ways. In addition to our primary aim of identifying, summarizing, and assessing the  
17  
18  
19 233 design and outcomes of existing published evaluations of Indigenous cultural safety  
20  
21  
22 234 education programming for healthcare professionals, we were particularly interested in  
23  
24 235 documenting underlying pedagogies, instructional strategies, formats, and content and  
25  
26  
27 236 how these might be related to program success across participant groups and contexts.  
28  
29  
30 237 We were also interested in the involvement of Indigenous instructors and Indigenous  
31  
32 238 communities and how this might have contributed to program success.

33  
34  
35 239

36  
37 240 The lead author led the synthesis of study design, participants, quality, and outcomes,  
38  
39  
40 241 drawing on data abstraction and with regular input from the other authors. Refinement of  
41  
42  
43 242 secondary narratives regarding (i) the role of underlying pedagogies and (ii) Indigenous  
44  
45 243 instructor and community involvement was achieved through iterative discussion of  
46  
47  
48 244 independently identified themes among the authorship team followed by in-depth re-  
49  
50  
51 245 examination of the included studies by the first author.

52  
53 246  
54  
55  
56  
57  
58  
59  
60

1  
2  
3  
4 247 Throughout the analysis, we applied a critical decolonizing lens where we intentionally  
5  
6 248 centered the distinct and diverse knowledges and strengths present in Indigenous  
7  
8  
9 249 communities' practices of health and wellbeing.(31-34) The authors sought to  
10  
11 250 acknowledge and critique the systemic power dynamics that so often inform existing  
12  
13  
14 251 health program evaluation models, particularly when applied to oppressed populations,  
15  
16 252 including Indigenous peoples in what is now known as Australia, Canada, New Zealand  
17  
18  
19 253 and the United States. In so doing, we drew upon the foundational Indigenous principles  
20  
21  
22 254 of relationships, reciprocity, responsibility, respect, and relevance (known as the five  
23  
24 255 R's),(35-36) and applied our decolonizing approach to our consideration and analysis of  
25  
26  
27 256 the inclusion (or lack thereof) of Indigenous knowledges and practices in the evaluation  
28  
29  
30 257 of identified studies. Research that looks to learn about Indigenous experiences of health  
31  
32 258 programs and policies requires acknowledging the unique and distinct relations and  
33  
34  
35 259 interconnections held by Indigenous peoples that are so often decontextualized through  
36  
37  
38 260 the application of Western methodologies.(27) In keeping with our decolonizing  
39  
40  
41 261 approach, it is important for us to self-locate the authorship team as comprised of two  
42  
43 262 Indigenous women (JS, DS), one racialized settler ally (BJH), and two non-racialized  
44  
45 263 settler allies (SF, CZ).

264

## 265 **Patient and Public Involvement**

266 We did not involve patients or the public in the design, or conduct, or reporting, or  
267 dissemination plans of our research.

1  
2  
3  
4 2685  
6 269 **RESULTS**7  
8  
9 270 **Literature search**

10  
11 271 The literature search strategy resulted in 2,442 citations (following removal of any  
12  
13 272 duplicates), from which 2,250 were deemed ineligible based on title and abstract  
14  
15 273 screening. 192 articles were selected for full-text review from which 176 were excluded  
16  
17 274 based on the primary inclusion criteria (n=147) or secondary inclusion criteria (n=29).  
18  
19 275 (Supplementary Figure 1) We were left with 16 unique studies that described and  
20  
21 276 evaluated Indigenous cultural safety training for health professionals and were deemed  
22  
23 277 eligible for full synthesis inclusion.(37-52) (Table 3)  
24  
25  
26  
27  
28  
29

30 278

31  
32 279 **Quality Appraisal**

33  
34  
35 280 Among the 16 studies that were included, three scored <7 on the WLHQAT.(42, 43, 50)  
36  
37 281 (Table 3) These studies were excluded from the synthesis. Lower scores reflected a  
38  
39 282 combination of the following: limited, to no involvement of Indigenous community partners  
40  
41 283 in the evaluation; inadequate sample size and/or lack of participant uptake and/or  
42  
43 284 retention in the evaluation; and/or weak evaluation study design.(43,50) For instance, a  
44  
45 285 low score could reflect that Indigenous scholars or community members were involved in  
46  
47 286 the design and/or delivery of the training program but not in the design and/or  
48  
49  
50  
51  
52  
53  
54  
55  
56  
57  
58  
59  
60

1  
2  
3  
4 287 implementation of the evaluation. Another study did not triangulate their qualitative study  
5  
6 288 results.(42)  
7

8  
9 289

## 10 11 290 **Study and population characteristics**

12  
13  
14 291 The 13 analyzed studies were published between 2014 – 2022. The majority (n=7) were  
15  
16 292 conducted in Australia.(40, 44, 46-49, 52) A smaller number (n=4) took place in  
17  
18 293 Canada.(38, 41, 45, 51) Of the last two studies, one was conducted in the United States  
19  
20 294 (US)(37) and the other was conducted in New Zealand.(39)  
21  
22  
23

24  
25 295

26  
27 296 Evaluation design varied widely. Nine of the studies applied mixed methods (37-38,  
28  
29 297 41,44-46, 48-49, 52) including various combinations of surveys, open-ended questions,  
30  
31 298 semi-structured interviews, and talking circles. One of these was a randomized trial that  
32  
33 299 incorporated a participatory action research approach, in which the research team  
34  
35 300 cooperated with the communities, supporting institutions and participants.(49) Two  
36  
37 301 studies were qualitative.(39,47) Another two were quantitative.(40,51) Eight studies  
38  
39 302 incorporated pre/post-intervention surveys.(38, 40-41, 45, 48-49, 51-52) Six of the studies  
40  
41 303 incorporated some measure of longer-term impact as part of the evaluation with varied  
42  
43 304 follow-up periods: across three years(44); 12 months(49); six months(39,48); and three  
44  
45 305 months.(38,41) The remainder of the studies (n=7) collected post-intervention data  
46  
47 306 immediately following the intervention. One intervention was described and evaluated  
48  
49 307 across multiple publications as part of a larger research program.(48-49) Most (n=10)  
50  
51  
52  
53  
54  
55  
56  
57  
58  
59  
60

1  
2  
3  
4 308 but not all of the studies, provided access to- and/or a detailed description of their  
5  
6 309 evaluation tools.(37-41, 44, 48-49, 51-52) Of the 11 studies that used survey tools, eight  
7  
8  
9 310 employed previously validated evaluation tools,(38, 40-41, 45, 48-49, 51-52) two of these,  
10  
11 311 although validated, were adapted by the research team.(41,51)

12  
13  
14 312  
15  
16 313 Sample sizes varied widely, ranging from six to 621, and studies took place in various  
17  
18 314 settings. The majority (n=8) occurred in clinical settings and the remainder were either  
19  
20 315 online (n=3) or a mix of online and in a classroom (n=2). Three of the studies recruited  
21  
22 316 specialized practitioners: rheumatologists(38), pharmacists(52), and speech language  
23  
24 317 therapists(39). One study recruited only family medicine residents(51) whereas another  
25  
26 318 focussed on nurses.(45) Four of the studies delivered interventions tailored to providers  
27  
28 319 serving a specific health service user population: arthritis(38), psychiatric care and mental  
29  
30 320 health(44); residential care(45), and Māori adults with aphasia.(39)

31  
32  
33  
34  
35 321  
36  
37  
38  
39  
40 322 **Reported Impacts of Indigenous Cultural Safety Education or Training**  
41  
42  
43 323 Study outcomes were almost exclusively learner-focused (n=10) and included learner  
44  
45 324 self-reports regarding: quality of the learning experience; changes in knowledge or  
46  
47 325 awareness; shifts in beliefs; attitudes regarding Indigenous peoples and their care  
48  
49 326 experiences; and/or confidence and skill to care for Indigenous peoples.(37-41,45-47,51-  
50  
51 327 52) (Table 2) A subset of learner-focused studies (n=4) included measures of self-  
52  
53 328 reported changes in practice.(38-39, 45, 47) These impacts were assessed using proxy  
54  
55  
56  
57  
58  
59  
60

1  
2  
3  
4 329 measures of clinical behaviour including post-intervention interviews with  
5  
6 330 learners,(39,47) or through the use of scenarios(38) or vignette-based care plans.(45)  
7  
8  
9 331 Although many of the studies reported significant changes in participants' attitudes,  
10  
11 332 knowledge and awareness, these findings were tempered by limitations in study design  
12  
13  
14 333 and implementation, such as self-selection bias,(38-40, 45-47, 51-52) small sample size,  
15  
16 334 low uptake and retention,(37-39, 41, 47, 51-52) the lack of randomization and/or controls  
17  
18  
19 335 (all, except for(49)) and potential social desirability response bias.(39) Conclusions  
20  
21  
22 336 regarding sustained impact over time, were limited by a paucity of studies (n=6) that  
23  
24 337 included longitudinal measurements.(38-39, 41, 44, 48-49)  
25  
26

27 338  
28  
29 339 Few studies reported on clinical outcomes, and most were based on self-assessments  
30  
31  
32 340 (n=4) as described above.(38-39, 45, 47) Three studies described externally-assessed,  
33  
34  
35 341 patient-based practice outcomes through the use of file audits(44, 48-49) and qualitative  
36  
37 342 interviews with patients at the participating clinics.(48) Of note, the one study that  
38  
39  
40 343 included a randomized control and externally assessed, patient-based practice outcomes  
41  
42  
43 344 did not demonstrate any significant intervention impact.(49)  
44

45 345  
46  
47  
48 346 Terminology varied widely across the studies, a phenomenon that has already been  
49  
50  
51 347 described elsewhere by Curtis et al(53) as negatively impacting the quality of the  
52  
53 348 evaluations and the ability to draw evidence-based comparisons. Some studies referred  
54  
55  
56 349 to cultural safety(37, 39, 45, 47) while others used terms such as: cultural awareness,(46)  
57  
58  
59

1  
2  
3  
4 350 cultural security,(44) cultural respect,(48-49) cultural competency(39-41), cultural  
5  
6 351 humility,(38) cross-cultural education and cultural capability,(52) and intercultural  
7  
8  
9 352 empathy.(51) A few studies relied upon proxy measures to assess cultural safety. For  
10  
11 353 example, Crowshoe et al(41) described an increase in learners' "confidence" as a proxy  
12  
13  
14 354 for cultural safety. Kerrigan et al(46) focused on behaviour change and self-reported  
15  
16 355 aspiration as indicative of positive clinical outcomes, and noted that although "it was  
17  
18  
19 356 impossible to assess" whether their intervention shifted behaviour, they could "surmise  
20  
21  
22 357 that health professionals aspire to transfer learning to the workplace."((46) p7) Similarly,  
23  
24 358 in a later paper, Kerrigan and colleagues(47) suggested, based upon post-intervention  
25  
26  
27 359 interviews with learners, that "[D]octors changed behaviour in relation to building rapport  
28  
29  
30 360 with patients, asking patients questions, working with Aboriginal interpreters, gaining  
31  
32 361 informed consent."(p13) In conclusion they noted that there is "still a need to assess if  
33  
34  
35 362 training improves patient experience and outcomes"(p14) to determine whether the  
36  
37  
38 363 intervention improved cultural safety.(47) A few authors reflected on the overall  
39  
40 364 limitations of their findings, suggesting that they were not generalizable and/or that  
41  
42  
43 365 additional research is required.(37, 45-46, 51) Hulko and colleagues(45) indicated that  
44  
45 366 their intervention and evaluation was based upon Secwepemc ways of knowing and being  
46  
47  
48 367 and doing and as such could not be scaled up whereas Barajas(37) acknowledged the  
49  
50  
51 368 value of specificity and context and warned against developing and implementing training  
52  
53 369 programs through a pan-Indigenous approach.

370

## 371 Training approaches and methods

372 Theoretical frameworks and pedagogical approaches were manifold. Studies referenced  
373 transformative learning theories(38, 47, 51); social-constructivist frameworks (44);  
374 diffusion of innovation theory(37); a public health framework(39); and, Educating for  
375 Equity (E4E)(38, 41). Liaw et al(48-49) describe a trans-theoretical approach in which  
376 they harmonised cultural intelligence frameworks, developments in cultural respect,  
377 safety and competence and a review of successful Aboriginal programs alongside  
378 consultation with Aboriginal communities and others. Others (n=4) designed their  
379 program with cultural safety and decolonizing philosophies at their core.(39-40, 46-47)  
380 For example, Kerrigan et al(46) place the responsibility for change on the “hegemonic  
381 individuals and institutions.”((46) p3) Only one paper explicitly cited critical race  
382 theory(47) as a core component. A limited number (n=3) did not cite a conceptual theory  
383 or framework and instead reviewed cultural safety, competency and awareness in  
384 healthcare training and the possible benefits related to training programs.(40, 45, 52)  
385 Lastly, some of the training programs applied participatory action approaches or  
386 community-based approaches to the development and delivery of the training.(44-45, 47-  
387 49)

388

389 Participation for all programs was voluntary. Overall, there were similarities in course  
390 content across programs. Training delivery modalities varied and included combinations  
391 of online modules, didactic lectures, interactive group discussions, workshops,



1  
2  
3  
4 392 simulations, and reflections. (Table 1) Only one was delivered as a series of online  
5  
6 393 podcasts, an approach which was well-received by learners.(47) Although some in-  
7  
8  
9 394 person trainings (n=3) were delivered by non-Indigenous instructors,(44, 48-49) most  
10  
11 395 (n=7) were co-delivered/facilitated by a mix of Indigenous and non-Indigenous  
12  
13  
14 396 facilitators(38, 41, 45, 51) or delivered only by Indigenous facilitator(s)/instructor(s) (Table  
15  
16  
17 397 4).(40, 46, 52) Some of the more innovative approaches incorporated story-telling and  
18  
19 398 talking circles with Elders(45); podcasts developed and voiced by Elders(47); and,  
20  
21  
22 399 simulation training facilitated with Indigenous community members.(51) Liaw et al.(48-49)  
23  
24 400 delivered an integrative program, Ways of Thinking, Ways of Doing, which in addition to  
25  
26  
27 401 a short workshop, participants were also provided with a case study reference toolkit and  
28  
29  
30 402 a cultural mentor.

31  
32 403  
33  
34  
35 404 With one exception,(49) all of the training programs reported some level of impact, though  
36  
37  
38 405 only a few of the authors linked the observed impact to their training approaches and  
39  
40  
41 406 methods. Some directly attributed action-oriented(44, 48-49) and community-based(37,  
42  
43 407 45, 51) approaches to the impact of the interventions. However, the same authors also  
44  
45  
46 408 noted that the participatory components to the learning materials were not incorporated  
47  
48  
49 409 consistently (e.g. AIMhi care plans and engagement of Aboriginal Mental Health  
50  
51 410 Workers(44) and cultural mentors(49)). Crowshoe et al(41) suggested that the impact of  
52  
53  
54 411 their training program was related to “interactive educational techniques and intentional  
55  
56 412 facilitation strategies”(p54) including a combination of Indigenous and non-Indigenous

1  
2  
3  
4 413 facilitators. Notably, this study had a high drop-out rate with less than half of the registered  
5  
6 414 learners completing the post-survey.(41) Chapman and colleagues,(40) who applied a  
7  
8  
9 415 multi-modal training delivered by an Indigenous trainer, described how the impact of their  
10  
11 416 training program was limited to significant changes in learners' perceptions whereas  
12  
13  
14 417 learners' attitudes remained unchanged. Kerrigan and colleagues(47) claimed their  
15  
16 418 online Elder podcast changed both learner attitudes and behaviours among a small,  
17  
18  
19 419 convenience sample of 14 learners, based on the analysis of semi-structured interviews  
20  
21  
22 420 post-intervention.  
23

24 421

## 27 422 **Indigenous community understandings of measures of success**

28  
29 423 Indigenous cultural safety can only truly be assessed through the lens of Indigenous  
30  
31  
32 424 patients and communities who ultimately are the recipients of clinical care.(54) It follows  
33  
34  
35 425 that Indigenous patient and community understandings and measures of success are  
36  
37 426 critical to assessing the impact of any Indigenous cultural safety training program.  
38  
39  
40 427 However, the degree of involvement of local Indigenous peoples and communities in the  
41  
42  
43 428 development, implementation, and evaluation of the educational interventions was limited  
44  
45 429 overall and differed across the studies. Table 4 (Summary of Indigenous Involvement in  
46  
47  
48 430 Curriculum Development, Curriculum Delivery and Research Activities) provides a  
49  
50  
51 431 summary overview. Six out of the 13 peer-reviewed papers included statements  
52  
53 432 describing the ethnic and/or Indigenous identity of the authors. Of these, half (n=3)  
54  
55  
56 433 covered the entire authorship(37, 45, 47) and the remainder (n=3) limited self-location to  
57  
58  
59

1  
2  
3  
4 434 Indigenous co-authors.(38 ,41 ,46) For the most part, Indigenous individuals and/or  
5  
6 435 community members contributed to the development and delivery of the curriculum, either  
7  
8  
9 436 as members of the research team or as local Indigenous community members engaged  
10  
11 437 through participatory and partnered approaches.  
12

13  
14 438

15  
16 439 Contributions by local Indigenous communities to study evaluations were far more limited,  
17  
18  
19 440 and rarely drew upon healthcare delivery and/or patient experience. Some established  
20  
21  
22 441 partnerships with Indigenous run organizations(48-49) whereas others relied upon  
23  
24  
25 442 survey tools that were developed in partnership with Indigenous advisors and  
26  
27 443 communities,(40, 52) however, these were not always locally informed. Others involved  
28  
29  
30 444 Indigenous Elders in the evaluation process.(45, 47) In these examples, the Elders were  
31  
32 445 involved in both the development and the evaluation of the curriculum. Lastly, only one  
33  
34  
35 446 evaluation focused on healthcare delivery and/or patient experience and included  
36  
37  
38 447 interviews with Indigenous patients and cultural mentors.(48)  
39

40 448

## 41 42 43 449 **DISCUSSION**

44  
45 450 The rapid growth of Indigenous cultural safety training for healthcare professionals is  
46  
47  
48 451 linked to a global movement to interrupt Indigenous/non-Indigenous health inequities,  
49  
50  
51 452 which are rooted in persistent colonial attitudes and systems, including anti-Indigenous  
52  
53  
54 453 stereotyping and racism.(15) The majority of the papers included here provide a rich  
55  
56  
57  
58  
59

1  
2  
3  
4 454 description of Indigenous cultural safety training program approaches, content, and  
5  
6 455 implementation. In contrast, analysis and synthesis of the accompanying evaluations of  
7  
8  
9 456 these same training programs revealed clear and cross-cutting gaps in the demonstration  
10  
11 457 of clinical- and/or system-level impacts, even though these are commonly referenced as  
12  
13  
14 458 desired outcomes. The majority of evaluations were limited in focus to learner  
15  
16 459 experiences and self-reported practice outcomes. For example, Kerrigan and  
17  
18  
19 460 colleagues(47); Brewer and colleagues(39) and Barajas(37) all suggested, through their  
20  
21  
22 461 evaluations, that the training programs resulted in changes in self-reported behaviour and  
23  
24 462 as such, intention and practice. These outcomes however, are subject to self-reporting  
25  
26  
27 463 response bias such as social desirability. While many of the studies were able to  
28  
29  
30 464 demonstrate some level of impact on knowledge and attitudes towards Indigenous  
31  
32 465 peoples by learners, none of these studies were able to establish an observable impact  
33  
34  
35 466 with respect to a shift towards more culturally safe and clinical practice guideline adherent  
36  
37  
38 467 healthcare for Indigenous patients.

39  
40 468

#### 41 42 43 469 **Evidence of shifts in knowledge and attitudes; but evidence-base is limited**

44  
45 470 Self-reported shifts in knowledge and attitudes regarding Indigenous peoples did improve  
46  
47  
48 471 across most of the studies.(37-41, 45-47, 51-52) Although limited, two of the studies  
49  
50  
51 472 suggested that these shifts may be sustained over time.(38-39) However, when  
52  
53 473 considering the stated impact of these studies, it is also important to take into account the  
54  
55  
56 474 many limitations inherent in the study design. Evaluation studies relied upon voluntary

1  
2  
3  
4 475 self-selection. Sample sizes were generally small and those that were longitudinal  
5  
6 476 showed significant baseline to post-intervention loss to follow-up. Eight of the 13  
7  
8  
9 477 evaluations involved pre-post assessments involving surveys and/or focus groups.(38,  
10  
11 478 40-41, 45, 48-49, 51-52) Only one of these included a control group.(49) In addition, only  
12  
13  
14 479 eight of the studies included validated quantitative surveys that employed scales.(38,40-  
15  
16 480 41, 45, 48-49, 51-52) As a result, the shifts in knowledge and attitudes can 'at best' be  
17  
18  
19 481 correlated with the described intervention and are limited by several biases arising from  
20  
21  
22 482 the dynamics of course evaluation and marking, participant optimism and in some  
23  
24 483 instances, the lack of anonymity as well as voluntary and low response rates. For the  
25  
26  
27 484 most part, when the described impact was an observable increase in knowledge or shift  
28  
29  
30 485 in attitudes, studies also tended to focus on participant experience of the program. These  
31  
32 486 measures highlight how participants expressed gratitude regarding what they learnt and  
33  
34  
35 487 spoke to how this might have improved their confidence in working with Indigenous  
36  
37  
38 488 patients going forward. These shifts in confidence, although surely positive, cannot be  
39  
40 489 interpreted as evidence of improved quality of care towards Indigenous patients in the  
41  
42  
43 490 healthcare system.

44  
45 491  
46  
47  
48 492 **Very little evidence of patient-focused impacts and no measures of systems-level impact**

49  
50 493 Cultural safety by definition can only be determined and evaluated by the person receiving  
51  
52  
53 494 the care and their family,(54) yet only three of 13 studies included tools designed to  
54  
55  
56 495 evaluate patient experience: a subset of patient interviews post-intervention(48) and

1  
2  
3  
4 496 pre/post file audits.(44, 49) Interestingly, Liaw and colleagues saw no impact, and  
5  
6 497 concluded, that “the lack of effect of the intervention may be attributable to study design  
7  
8 498 limitations, complex and indirect relationship between the intervention and the outcome  
9  
10  
11 499 measures, or contextual factors that influenced the fidelity of the intervention at the  
12  
13  
14 500 Medicare Local/PHN level and its ability to achieve measurable changes in the target  
15  
16 501 behaviours.”((49) p267) None of the studies attempted to measure adherence to clinical  
17  
18  
19 502 practice guidelines, a critical outcome measure which is typically associated with provider  
20  
21  
22 503 training outcomes and could be evaluated through the use of standardized patients(55-  
23  
24 504 57), ideally unannounced, or through file audits of clinical care.(58, 59) Kirkpatrick has  
25  
26  
27 505 argued that it is “difficult, if not impossible to evaluate the impact of training on an  
28  
29  
30 506 organization due to an inability to separate the variables which could be attributed to other  
31  
32 507 factors.”((60)p59) In this study, we focused on interventions implemented at the level of  
33  
34  
35 508 the healthcare provider, however, the approach does not limit the evaluation to individual  
36  
37  
38 509 level measures, as cultural safety training of healthcare providers can have  
39  
40 510 organizational-level impacts. None of the studies evaluated systems-level changes that  
41  
42  
43 511 may have been associated with individual training. Understanding the networked effect  
44  
45  
46 512 of how training participants subsequently influence their colleagues will be important  
47  
48 513 going forward. Hulko and colleagues(45) noted that cultural safety research in general  
49  
50  
51 514 needs to advance tools that will measure these effects, and noted that organizational  
52  
53 515 change will require institutional supports and policy changes that encourage healthcare  
54  
55  
56 516 professionals to implement culturally safe practices.

1  
2  
3  
4 517  
5  
6 518 **Impactful specific training approaches, strategies, formats or content**  
7  
8  
9 519 The application of purposeful, evidence-based, pedagogical theory and practices that  
10  
11 520 advance pre-requisite knowledge, self-awareness and skills is critical to the success of  
12  
13  
14 521 cultural safety training and education programs. A number of the reviewed studies  
15  
16 522 described how specific training approaches, formats or content may have contributed to  
17  
18  
19 523 impact, however, most of the authors were also careful to note the limitations of their  
20  
21  
22 524 outcomes and the need for further research to clarify whether and if so, how, approach  
23  
24  
25 525 and content of the training program contributed to the outcomes. Some authors also  
26  
27 526 described how variation between past and current evaluations of Indigenous cultural  
28  
29  
30 527 safety, including conceptual frameworks, measurement tools and aims, resulted in an  
31  
32 528 overall lack of consensus and limited the development of an evidence-base.(39, 46)  
33  
34  
35 529 Hinton et al(44) spoke to the value of a participatory action-oriented study design that  
36  
37  
38 530 incorporated institutional leadership as change agents and clinical champions to  
39  
40 531 encourage recruitment and uptake. This was further supported by Brewer et al.(39) who  
41  
42  
43 532 observed low uptake and argued that incentives, particularly over the longer term, were  
44  
45  
46 533 not always effective and that to improve uptake, and consequently evaluation, training  
47  
48 534 ought to be “compulsory or obligatory” and recommended organizational commitment and  
49  
50  
51 535 team involvement. Implementing mandated training alongside appropriate evaluations  
52  
53 536 using file audits, simulation and/or standardized patients will undoubtedly require training  
54  
55  
56  
57  
58  
59  
60

1  
2  
3  
4 537 and evaluation protocols that address arising concerns of participant healthcare  
5  
6 538 professionals.

7  
8  
9 539  
10  
11 540 The evidence was limited as to whether or not inclusion of Indigenous peoples and  
12  
13  
14 541 communities contributed to successful outcomes, although a number of the studies  
15  
16 542 referenced various components, such as Indigenous vodcasts, guest speakers, cultural  
17  
18  
19 543 mentors, and academic lecturers as key to the programs they evaluated. Liaw and  
20  
21  
22 544 colleagues concluded that the strength of their program may have been resultant from  
23  
24 545 the inclusion of cultural mentors who, when “working with practice staff in their own  
25  
26  
27 546 environment, were effective translators of cultural respect theory and knowledge, as  
28  
29  
30 547 formalized in the toolkit and delivered by the workshop, into practice.”((48) p391) Hinton  
31  
32 548 and colleagues(44) also made similar observations regarding cultural advisors, who were  
33  
34  
35 549 involved in the action-oriented programming and group sessions.

36  
37  
38 550

### 39 40 551 **Strengths and limitations**

41  
42 552 We acknowledge that classic systematic review methods have been developed outside  
43  
44  
45 553 of Indigenous contexts, without explicit alignment to Indigenous worldviews, community  
46  
47  
48 554 requirements, and methodologies. Our team of Indigenous and allied scientists and  
49  
50  
51 555 Indigenous health service leaders built upon existing tailored Indigenous systematic  
52  
53 556 review methodologies(27-29) to implement a method aimed at optimizing relevance for  
54  
55  
56 557 Indigenous peoples through: (1) co-design, co-leadership and co-authorship by leading  
57  
58  
59



1  
2  
3  
4 558 Indigenous methods scholars and Indigenous cultural safety educators, ensuring that  
5  
6 559 their expertise and knowledge was centred throughout the project; (2) direct involvement  
7  
8  
9 560 of a senior Indigenous scholar and methodologist (JS) in all stages of the review, analysis  
10  
11 561 and synthesis; (3) application of a data extraction tool developed in consultation with  
12  
13  
14 562 Indigenous community partners: the Southern Ontario Aboriginal Health Access Centre  
15  
16 563 (SOAHAC) (Supplementary File 2) and the WLHQAT, a quality appraisal tool that was  
17  
18  
19 564 designed at an Indigenous-led research centre in partnership with Indigenous community  
20  
21  
22 565 members.

23  
24 566 The review is limited to ICS programs with evaluations that have been published in the  
25  
26  
27 567 peer-review and grey literature and as such, may not have captured the true breadth of  
28  
29  
30 568 existing Indigenous cultural safety training programs and related evaluations. To optimize  
31  
32 569 feasibility and study coherence, we did not include organizational level interventions as  
33  
34  
35 570 for this initial study. Instead, we limited our focus to interventions directed towards  
36  
37  
38 571 healthcare providers. We do recognize that it is likely that lasting system-level impacts  
39  
40 572 will require interventions that are implemented and evaluated at both the individual and  
41  
42  
43 573 organizational levels and would like to highlight the need for additional research focused  
44  
45 574 on advancing and evaluating system-level interventions. Lastly, the review was  
46  
47  
48 575 conducted over a lengthy period of time due to the required extensive and iterative  
49  
50  
51 576 consultation with community partners and Indigenous study team members in the  
52  
53 577 development and implementation of the final screening protocol to ensure that we were  
54  
55  
56 578 centering Indigenous worldviews, experiences, and community considerations.

1  
2  
3  
4 5795  
6 580 **CONCLUDING REMARKS**

7  
8  
9 581 Overall, there is a paucity of evidence linking existing Indigenous cultural safety training  
10  
11 582 interventions to enhancements in non-Indigenous healthcare professionals' knowledge,  
12  
13  
14 583 culturally safe engagement skills and clinical practice guideline adherence when caring  
15  
16  
17 584 for Indigenous patients. As researchers and practitioners in this field, we note that these  
18  
19 585 gaps in rigorous patient-outcome focused scholarship are rooted in systemic limitations  
20  
21  
22 586 in the resources available to organizations leading this work to carry out and disseminate  
23  
24  
25 587 comprehensive and cost-intensive evaluations. This systemic under-resourcing and the  
26  
27  
28 588 linked implementation of non-evidence-based interventions is problematic, inconsistent  
29  
30 589 with the evidence standards required in other domains of clinical training, and is  
31  
32  
33 590 commonly associated with the same harmful anti-Indigenous, colonial policies and  
34  
35  
36 591 practices that training is designed to disrupt. Further research investment, with funds  
37  
38  
39 592 directed towards Indigenous-led agencies and organizations that are leading the work in  
40  
41  
42 593 this field, is required to advance training program evaluation design, implementation,  
43  
44  
45 594 analysis and dissemination. These investments would ensure that both the training  
46  
47  
48 595 programs and their evaluations meet the dual criteria of excellence in Indigenous health  
49  
50  
51 596 research: a) methodological rigour and b) alignment with and connection to local, regional  
52  
53  
54 597 and/or national Indigenous priorities and needs.

55  
56  
57  
58  
59  
60 598

## 599 **AUTHORS' CONTRIBUTIONS**

600 JS and DS conceptualized the systematic review. JS made significant contributions to the  
601 interpretation of the data. CZ carried out the database literature searches. SF and BJH  
602 screened titles and carried out data extraction. BJH and JS carried out the initial analysis  
603 and interpretation of the data and together, generated consensus with SF regarding key  
604 themes. DS commented on high level key themes. BJH, SF and JS drafted sections of  
605 the manuscript and DS commented on the manuscript in progress. All authors contributed  
606 to study design and interpretation of findings, and approved the final manuscript.

## 608 **COMPETING INTERESTS**

609 All authors have completed the ICMJE uniform disclosure form at  
610 [www.icmje.org/disclosure-of-interest/](http://www.icmje.org/disclosure-of-interest/). BJH, SF and CZ declare no competing interests. JS  
611 has no significant competing interests. JS is a sibling of DS. JS and DS are both members  
612 of the Indigenous Cultural Safety Learning Series Advisory Circle in Canada, funded by  
613 San'yas and co-hosted by the Ontario Federation of Indigenous Friendship Centres. The  
614 Indigenous Cultural Safety Learning Series is a webinar series focused on Indigenous  
615 cultural safety. It is guided by an Advisory Circle of Indigenous leaders from across  
616 Canada. DS was employed by the Southwest Ontario Aboriginal Health Access Centre  
617 (SOAHAC) (one of the funding agencies), in the early stages of this review until March  
618 2020. DS is currently employed by San'yas Indigenous Cultural Safety Learning

1  
2  
3  
4 619 Programs, Indigenous Health, Provincial Health Services Authority as of September  
5  
6 620 2020. They offer educational interventions and consultation services designed to uproot  
7  
8  
9 621 anti-Indigenous racism and promote cultural safety for Indigenous peoples. One of the  
10  
11 622 interventions studied included an early version of one of the online training programs  
12  
13  
14 623 offered by San'yas. It was referred to as Indigenous Cultural Competency (ICC) and was  
15  
16 624 applied as part of a larger intervention in one of the articles included in the systematic  
17  
18  
19 625 review. This version was delivered prior to DS' employment with San'yas. The program  
20  
21  
22 626 is situated within a Provincial Health Services Authority (PHSA) in British Columbia,  
23  
24 627 Canada and operated on a non-profit, cost recovery model through fees charged for the  
25  
26  
27 628 training and with oversight by PHSA Indigenous Health Leadership. All of DS'  
28  
29  
30 629 compensation is subject to PHSA policies and DS is not permitted to receive any  
31  
32 630 compensation or payments outside of salary and benefits. DS' contributions were limited  
33  
34  
35 631 to the conceptual design of the study as well as high level commentary and feedback on  
36  
37  
38 632 high level thematic analyses and draft manuscripts. DS was blinded to the mention of ICC  
39  
40 633 (now San'yas) training materials in any discussions related to higher level thematic  
41  
42  
43 634 analysis.

44  
45 635

## 46 47 48 636 **FUNDING**

49  
50  
51  
52  
53  
54  
55  
56  
57  
58  
59  
60

1  
2  
3  
4 637 Dr. Smylie is funded by a Tier 1 Canada Research Chair. This project was also supported  
5  
6 638 by funding from the Southwest Ontario Aboriginal Health Access Centre (SOAHAC) and  
7  
8  
9 639 the St. Michael's Hospital Foundation.

10  
11 640

## 14 641 **DATA SHARING**

16  
17 642 Most of the data generated or analysed as well as the WLHQAT applied during this study  
18  
19 643 are publicly available. Additional materials are available upon request from the  
20  
21  
22 644 corresponding author.

23  
24  
25 645

## 28 646 **ETHICS APPROVAL AND CONSENT TO PARTICIPATE**

29  
30 647 Ethics approval and consent to participate were not required for this study.

31  
32  
33 648

34  
35  
36 649

## 38 650 **REFERENCE LIST**

- 39  
40  
41 651 1. Commission on Social Determinants of Health (CSDH). Social Determinants and  
42  
43 652 Indigenous Health: The International Experience and Its Policy Implications.  
44  
45  
46 653 Adelaide: International Symposium on the Social Determinants of Indigenous  
47  
48  
49 654 Health. 2007 Apr [cited 2023 Jan 6]. 40 p. Available from:  
50  
51 655 <https://nativehealthdatabase.net/node/17216>

- 1  
2  
3  
4 656 2. Stephanovich O. Pope Francis apologizes to Indigenous delegates for “deplorable”  
5  
6 657 abuses at residential schools. CBC News [Internet]. 2022 Apr 1 [cited 2023 Jan 6].  
7  
8  
9 658 Available from: [https://www.cbc.ca/news/politics/pope-francis-responds-indigenous-](https://www.cbc.ca/news/politics/pope-francis-responds-indigenous-delegations-final-meeting-1.6404344)  
10  
11 659 [delegations-final-meeting-1.6404344](https://www.cbc.ca/news/politics/pope-francis-responds-indigenous-delegations-final-meeting-1.6404344)
- 12  
13  
14  
15 660 3. Yardely J, Neuman W. In Bolivia, Pope Francis Apologizes for Church’s ‘Grave  
16  
17 661 Sins’. New York Times [Internet]. 2015 Jul 9 [cited 2023 Jan 6]. Available from:  
18  
19  
20 662 [https://www.nytimes.com/2015/07/10/world/americas/pope-francis-bolivia-catholic-](https://www.nytimes.com/2015/07/10/world/americas/pope-francis-bolivia-catholic-church-apology.html)  
21  
22 663 [church-apology.html](https://www.nytimes.com/2015/07/10/world/americas/pope-francis-bolivia-catholic-church-apology.html)
- 23  
24  
25  
26 664 4. Parliament of Australia. Prime Minister Kevin Rudd, MP—Apology to Australia’s  
27  
28 665 indigenous peoples [television broadcast]. 2008.
- 29  
30  
31  
32  
33 666 5. Spencer G. Queen Signs Historic Maori Land Settlement. AP News. 1995 Nov 2  
34  
35 667 [cited 2023 Jan 6]. Available from:  
36  
37 668 <https://apnews.com/article/808c85d946ad2a26c29813a2403e808e>
- 38  
39  
40  
41 669 6. Jackson M. In the end “The hope of decolonization”. In: McKinley E, Tuhiwai Smith  
42  
43 670 L, editors. Handbook of Indigenous education. Singapore: Springer; 2019. P. 101-  
44  
45 671 10.
- 46  
47  
48  
49  
50 672 7. Wolfe P. Settler colonialism and the elimination of the native. J Genocide Res. 2006  
51  
52 673 Dec; 8(4): 387–409.
- 53  
54  
55  
56  
57  
58  
59  
60

- 1  
2  
3  
4 674 8. Reid P, Cormack D, Paine SJ. Colonial histories, racism and health—The  
5  
6 675 experience of Māori and Indigenous peoples. *Public Health*. 2019 Jul; 172: 119–24.  
7  
8  
9  
10 676 9. Zuberi T. *Thicker than blood. How Racial Statistics Lie*. Minnesota (USA): University  
11  
12 677 of Minnesota Press; 2013.
- 13  
14  
15  
16 678 10. National Collaborating Centre for Indigenous Health. Reading C. *Social*  
17  
18 679 *Determinants of Health: Understanding Racism*. [Internet] Vancouver (CA): NCCIH;  
19  
20 680 2020 [updated 2020 Sep 08; cited 2023 Jan 6]. Available from:  
21  
22 681 [https://www.nccih.ca/495/Understanding\\_racism.nccih?id=103](https://www.nccih.ca/495/Understanding_racism.nccih?id=103).
- 23  
24  
25  
26  
27 682 11. Paine S, Cormack D, Reid P, Harris R, Robson B. Kaupapa Māori-informed  
28  
29 683 approaches to support data rights and self-determination. In: Walter M, Kukutai T,  
30  
31 684 Carroll S, Rodriguez-Lonebear D, editors. *Indigenous Data Sovereignty and Policy*.  
32  
33 685 Oxfordshire (GB): Routledge; 2020. P. 187-203
- 34  
35  
36  
37  
38  
39 686 12. Youé C. Settler colonialism or colonies with settlers? *Can J Afr Stud Rev Can*  
40  
41 687 *Études Afr*. 2018; 52(1): 69–85.
- 42  
43  
44  
45 688 13. Allan B & Smylie J, *First Peoples, second class treatment: The role of racism in the*  
46  
47 689 *health and well-being of Indigenous peoples in Canada*. (2015). Toronto. The  
48  
49 690 Wellesley Institute
- 50  
51  
52  
53  
54  
55  
56  
57  
58  
59  
60

- 1  
2  
3  
4 691 14. Harding L. What's the harm? Examining the stereotyping of Indigenous peoples in  
5  
6 692 health systems. 2018.  
7  
8  
9  
10 693 15. Smylie J, Harris RB, Paine S, et al. Beyond shame, sorrow, and apologies – action  
11  
12 694 to address Indigenous health inequities. *BMJ* 2022; 378:o1688  
13  
14  
15  
16 695 16. Nerestant A. Racism, prejudice contributed to Joyce Echaquan's death in hospital,  
17  
18 696 Quebec coroner's inquiry concludes. *CBC News* [Internet]. 2021 Oct 01 [cited 2023  
19  
20  
21 697 Jan 6]. Available from: [https://www.cbc.ca/news/canada/montreal/joyce-echaquan-](https://www.cbc.ca/news/canada/montreal/joyce-echaquan-systemic-racism-quebec-government-1.6196038)  
22  
23  
24 698 [systemic-racism-quebec-government-1.6196038](https://www.cbc.ca/news/canada/montreal/joyce-echaquan-systemic-racism-quebec-government-1.6196038)  
25  
26  
27  
28 699 17. *CBC News*. Atikamekw community "shocked" by François Legault comments on  
29  
30 700 Joyce Echaquan's death. *CBC News* [Internet]. 2022 Sep 17 [cited 2023 Jan 6].  
31  
32  
33 701 Available from: [https://www.cbc.ca/news/canada/montreal/atikamekw-shocked-](https://www.cbc.ca/news/canada/montreal/atikamekw-shocked-legault-joyce-echaquan-comment-1.6586853)  
34  
35 702 [legault-joyce-echaquan-comment-1.6586853](https://www.cbc.ca/news/canada/montreal/atikamekw-shocked-legault-joyce-echaquan-comment-1.6586853)  
36  
37  
38  
39 703 18. Hall WJ, Chapman MV, Lee KM, Merino YM, Thomas TW, Payne BK, et al. Implicit  
40  
41 704 Racial/Ethnic Bias Among Health Care Professionals and Its Influence on Health  
42  
43  
44 705 Care Outcomes: A Systematic Review. *Am J Public Health*. 2015 Dec; 105(12):  
45  
46  
47 706 e60–76.  
48  
49  
50 707 19. FitzGerald C, Hurst S. Implicit bias in healthcare professionals: a systematic review.  
51  
52  
53 708 *BMC Med Ethics*. 2017 Mar; 18(1): 19.  
54  
55  
56  
57  
58  
59  
60



- 1  
2  
3  
4 709 20. Green AR, Carney DR, Pallin DJ, Ngo LH, Raymond KL, Iezzoni LI, et al. Implicit  
5  
6 710 Bias among Physicians and its Prediction of Thrombolysis Decisions for Black and  
7  
8 711 White Patients. *J Gen Intern Med.* 2007 Sep; 22(9): 1231–8.
- 10  
11  
12 712 21. The Truth Reconciliation Commission of Canada. Honouring the Truth, Reconciling  
13  
14  
15 713 for the future: summary of the final report of the Truth and Reconciliation  
16  
17 714 Commission of Canada. 2015
- 19  
20  
21 715 22. Churchill M, Parent-Bergeron M, Smylie J, Fridkin A, Smylie D, Firestone M.  
22  
23  
24 716 Evidence Brief: Wise Practices for Indigenous-specific Cultural Safety Training  
25  
26 717 Programs [Internet]. Toronto: Well Living House Action Research Centre for  
27  
28 718 Indigenous Infant, Child, and Family Health and Wellbeing; 2017 Aug [cited 2022  
29  
30 719 Jan 06]. 21 p. Available from: [http://www.welllivinghouse.com/wp-](http://www.welllivinghouse.com/wp-content/uploads/2019/05/2017-Wise-Practices-in-Indigenous-Specific-Cultural-Safety-Training-Programs.pdf)  
31  
32 720 [content/uploads/2019/05/2017-Wise-Practices-in-Indigenous-Specific-Cultural-](http://www.welllivinghouse.com/wp-content/uploads/2019/05/2017-Wise-Practices-in-Indigenous-Specific-Cultural-Safety-Training-Programs.pdf)  
33  
34 721 [Safety-Training-Programs.pdf](http://www.welllivinghouse.com/wp-content/uploads/2019/05/2017-Wise-Practices-in-Indigenous-Specific-Cultural-Safety-Training-Programs.pdf)
- 36  
37  
38  
39  
40 722 23. MacLean TL, Qiang JR, Henderson L, et al. Indigenous cultural safety training for  
41  
42  
43 723 applied health, social work, and education professionals: a PRISMA scoping review.  
44  
45 724 2023;20(6):5217
- 47  
48  
49 725 24. Page MJ, McKenzie JE, Bossuyt PM, Boutron I, Hoffmann TC, Mulrow CD, et al.  
50  
51  
52 726 The PRISMA 2020 statement: an updated guideline for reporting systematic  
53  
54 727 reviews. *BMJ (Online).* 2021 Mar; 372: n71.

- 1  
2  
3  
4 728 25. Lefebvre C, Glanville J, Briscoe S, Littlewood A, Marshall C, Metzendorf M, et al.  
5  
6 729 Searching for and selecting studies. In: Cochrane Handbook for Systematic Reviews  
7  
8  
9 730 of Interventions. Chichester, UK: John Wiley & Sons, Ltd; 2019. p. 67–107  
10  
11  
12 731 26. Harrison H, Griffin SJ, Kuhn I, Usher-Smith JA. Software tools to support title and  
13  
14  
15 732 abstract screening for systematic reviews in healthcare: an evaluation. BMC Med  
16  
17  
18 733 Res Methodol. 2020 Jan; 20(1): 7.  
19  
20  
21 734 27. Maddox R, Blais G, Mashford-Pringle A, Monchalin R, Firestone M, Ziegler C, et al.  
22  
23  
24 735 Reviewing Health Service and Program Evaluations in Indigenous Contexts: A  
25  
26  
27 736 Systematic Review. Am J Eval. 2021; 42(3): 332–53.  
28  
29  
30 737 28. Morton Ninomiya ME, Atkinson D, Brascoupé S, Firestone M, Robinson N, Reading  
31  
32  
33 738 J, et al. Effective knowledge translation approaches and practices in Indigenous  
34  
35  
36 739 health research: a systematic review protocol. Syst Rev. 2017 Feb; 6(1): 34.  
37  
38  
39 740 29. Smylie J, Kirst M, McShane K, Firestone M, Wolfe S, O'Campo P. Understanding  
40  
41  
42 741 the role of Indigenous community participation in Indigenous prenatal and infant-  
43  
44  
45 742 toddler health promotion programs in Canada: A realist review. Soc Sci Med. 2016  
46  
47  
48 743 Feb; 150: 128–43.  
49  
50  
51 744 30. Popay J, Roberts H, Sowden A, Petticrew M, Arai L, Rodgers M, et al. Guidance on  
52  
53  
54 745 the conduct of narrative synthesis in systematic reviews. A product from the ESRC  
55  
56  
57 746 methods programme Version. 2006 Apr; 1(1): b92.  
58  
59  
60

- 1  
2  
3  
4 747 31. Smylie J, Kaplan-Myrth N, McShane K, Métis Nation of Ontario-Ottawa Council  
5  
6 748 Pikwakanagan First Nation Tungasuvvingat Inuit Family Resource Centre.  
7  
8  
9 749 Indigenous knowledge translation: baseline findings in a qualitative study of the  
10  
11 750 pathways of health knowledge in three indigenous communities in Canada. *Health*  
12  
13  
14 751 *Promot Pract*. 2009 Jul; 10(3): 436–46.
- 15  
16  
17 752 32. Smylie J. Knowledge translation and Indigenous knowledge. A decolonizing  
18  
19  
20 753 perspective. In: Banister EM, Leadbeater BJ, Marshall A, editors. *Knowledge*  
21  
22 754 *Translation in community-based research and social policy contexts*. Toronto:  
23  
24  
25 755 University of Toronto Press; 2011. p. 181–208.
- 26  
27  
28  
29 756 33. Smylie J, Olding M, Ziegler C. Sharing What We Know about Living a Good Life:  
30  
31 757 Indigenous Approaches to Knowledge Translation. *J Can Health Libr Assoc*. 2014;  
32  
33 758 35: 16–23.
- 34  
35  
36  
37  
38 759 34. Allan B, Smylie J. All our relations: Indigenous Women’s Health in Canada. In:  
39  
40 760 Varcoe C, Hankivsky O, Morrow MH, editors. *Women’s health in Canada:*  
41  
42 761 *challenges of intersectionality*. Toronto, CA: University of Toronto Press; 2022.  
43  
44  
45 762 p.116-117
- 46  
47  
48  
49 763 35. Kirkness VJ and Barnhardt R. First Nations and higher education: the four R’s -  
50  
51 764 respect, relevance, reciprocity, responsibility. *Journal of American Education*. 1991;  
52  
53 765 30(3): 1-15.
- 54  
55  
56  
57  
58  
59  
60

- 1  
2  
3  
4 766 36. Restoule JP. The five r's of Indigenous research: Relationship, respect, relevance,  
5  
6 767 responsibility, and reciprocity. Workshop presented at: Wise Practices II: Canadian  
7  
8 768 Aboriginal AIDS Network Research and Capacity Building Conference; 2008 Nov  
9  
10  
11 769 26; Toronto.
- 12  
13  
14  
15 770 37. Barajas JJ. Cultural Sensitivity for Healthcare Provides on the Tohono O'Odham  
16  
17 771 Nation: a Quality Improvement Project [dissertation]. Ann Arbor (USA): ProQuest  
18  
19 772 Dissertations Publishing; 2021. 92 p.
- 20  
21  
22  
23  
24 773 38. Barnabe C, Kherani RB, Appleton T, Umaefulam V, Henderson R, Crowshoe L.  
25  
26 774 Participant-reported effect of an Indigenous health continuing professional  
27  
28 775 development initiative for specialists. *BMC Med Educ.* 2021 Dec; 21(1): 116.
- 29  
30  
31  
32  
33 776 39. Brewer KM, McCann CM, Harwood MLN. Working with Māori adults with aphasia:  
34  
35 777 an online professional development course for speech-language therapists.  
36  
37 778 *Aphasiology.* 2020 Nov; 34(11): 1413–31.
- 38  
39  
40  
41 779 40. Chapman R, Martin C, Smith T. Evaluation of staff cultural awareness before and  
42  
43 780 after attending cultural awareness training in an Australian emergency department.  
44  
45 781 *Int Emerg Nurs.* 2014 Oct; 22(4): 179–84.
- 46  
47  
48  
49  
50 782 41. Crowshoe L, Han H, Calam B, Henderson R, Jacklin K, Walker L, et al. Impacts of  
51  
52 783 Educating for Equity Workshop on Addressing Social Barriers of Type 2 Diabetes  
53  
54 784 With Indigenous Patients. *J Contin Educ Health Prof.* 2018 Dec; 38(1): 49–59.

- 1  
2  
3  
4 785 42. Delbridge R, Wilson A, Palermo C. Measuring the impact of a community of practice  
5  
6 786 in Aboriginal health. *Stud Contin Educ*. 2018 Jan; 40(1): 62–75.  
7  
8  
9  
10 787 43. Durey A, Halkett G, Berg M, Lester L, Kickett M. Does one workshop on respecting  
11  
12 788 cultural differences increase health professionals' confidence to improve the care of  
13  
14  
15 789 Australian Aboriginal patients with cancer? An evaluation. *BMC Health Serv Res*.  
16  
17 790 2017 Dec; 17(1): 660.  
18  
19  
20  
21 791 44. Hinton R, Bradley P, Trauer T, Nagel T. Strengthening acute inpatient mental health  
22  
23 792 care for Indigenous clients. *Adv Ment Health*. 2014 Aug; 12(2): 125–35.  
24  
25  
26  
27 793 45. Hulko W, Mahara MS, Wilson D, Campbell-McArthur G. Culturally safe dementia  
28  
29 794 care: Building nursing capacity to care for First Nation Elders with memory loss. *Int J*  
30  
31  
32 795 *Older People Nurs*. 2021 Sep; 16(5): e12395.  
33  
34  
35  
36 796 46. Kerrigan V, Lewis N, Cass A, Hefler M, Ralph AP. "How can I do more?" Cultural  
37  
38 797 awareness training for hospital-based healthcare providers working with high  
39  
40  
41 798 Aboriginal caseload. *BMC Med Educ*. 2020 Dec; 20(1): 173.  
42  
43  
44  
45 799 47. Kerrigan V, McGrath SY, Herdman RM, Puruntatameri P, Lee B, Cass A, et al.  
46  
47 800 Evaluation of 'Ask the Specialist': a cultural education podcast to inspire improved  
48  
49 801 healthcare for Aboriginal peoples in Northern Australia. *Health Sociol Rev*. 2022  
50  
51  
52 802 May; 31(2): 139–57.  
53  
54  
55  
56  
57  
58  
59  
60

- 1  
2  
3  
4 803 48. Liaw ST, Hasan I, Wade V, Canalese R, Kelaher M, Lau P, et al. Improving cultural  
5  
6 804 respect to improve Aboriginal health in general practice: a multi-methods and multi-  
7  
8  
9 805 perspective pragmatic study. *Aust Fam Physician*. 2015 Jun; 44(6): 387-92.  
10  
11  
12 806 49. Liaw S, Wade V, Furler JS, Hasan I, Lau P, Kelaher M, et al. Cultural respect in  
13  
14  
15 807 general practice: a cluster randomised controlled trial. *Med J Aust*. 2019 Apr; 210(6):  
16  
17 808 263–8.  
18  
19  
20  
21 809 50. McMichael B, Nickel A, Duffy EA, Skjefte L, Lee L, Park P, et al. The Impact of  
22  
23  
24 810 Health Equity Coaching on Patient's Perceptions of Cultural Competency and  
25  
26 811 Communication in a Pediatric Emergency Department: An Intervention Design. *J*  
27  
28  
29 812 *Patient Exp*. 2019 Dec; 6(4): 257–64.  
30  
31  
32  
33 813 51. Sauv e A, Cappelletti A, Murji L. Stand Up for Indigenous Health: A Simulation to  
34  
35 814 Educate Residents About the Social Determinants of Health Faced by Indigenous  
36  
37  
38 815 Peoples in Canada. *Acad Med*. 2022 Apr; 97(4): 518–23.  
39  
40  
41  
42 816 52. Wheeler AJ, Hu J, Tadakamadla SK, Hall K, Miller A, Kelly F. Development and  
43  
44 817 feasibility testing of a training programme for community pharmacists to deliver a  
45  
46  
47 818 culturally responsive medication review intervention. *Pilot Feasibility Stud*. 2022  
48  
49 819 Dec; 8(1): 51.  
50  
51  
52  
53 820 53. Curtis E, Jones R, Tipene-Leach D, Walker C, Loring B, Paine SJ, et al. Why  
54  
55  
56 821 cultural safety rather than cultural competency is required to achieve health equity: a

- 1  
2  
3  
4 822 literature review and recommended definition. *Int J Equity Health*. 2019 Nov; 18(1):  
5  
6 823 174.  
7  
8  
9  
10 824 54. Ramsden IM. Cultural safety and nursing education in Aotearoa and Te  
11  
12 825 Waipounamu [dissertation]. Wellington (NZ): Victoria University of Wellington; 2002.  
13  
14  
15 826 211 p.  
16  
17  
18 827 55. Badger LW, deGruy F, Hartman J, Plant MA, Leeper J, Ficken R, et al. Stability of  
19  
20  
21 828 standardized patients' performance in a study of clinical decision making. *Fam Med*.  
22  
23  
24 829 1995 Feb; 27(2): 126–31.  
25  
26  
27 830 56. Colliver JA, Vu NV, Marcy ML, Travis TA, Robbs RS. Effects of examinee gender,  
28  
29  
30 831 standardized-patient gender, and their interaction on standardized patients' ratings  
31  
32  
33 832 of examinees' interpersonal and communication skills. *Acad Med*. 1993; 68: 153–7.  
34  
35  
36 833 57. Rethans JJ, Boven CP van. Simulated patients in general practice: a different look at  
37  
38  
39 834 the consultation. *Br Med J Clin Res Ed*. 1987 Mar; 294(6575): 809–12.  
40  
41  
42 835 58. Abad-Arranz M, Moran-Rodriguez A, Mascarós Balaguer E, Quintana Velasco C,  
43  
44 836 Abad Polo L,  
45  
46  
47 837 Núñez Palamo S, et al., Community Assessment of COPD Health Care (COACH)  
48  
49 838 study: a clinical Audit on primary care performance variability in COPD Care. *BMC*  
50  
51 839 *Med Res Methodol*. 2018; 18(1): 68–68  
52  
53 840  
54  
55  
56  
57  
58  
59  
60

1  
2  
3  
4 841 59. Crabtree A, Sundararaj JJ, Pease N. Clinical audit?—invaluable! BMJ Support Palliat  
5  
6 842 Care. 2020  
7  
8 843 June; 10(2): 213-5

9 844  
10  
11 845 60. Kirkpatrick D. Great ideas revisited: Techniques for evaluating training programs.  
12  
13 846 Train Dev. 1996; 50(1): 54.

14  
15 847  
16  
17 848 **LIST OF ABBREVIATIONS**

18  
19  
20 849 Well Living House Quality Appraisal Tool (WLHQAT)  
21  
22  
23 850 South Ontario Aboriginal Health Access Centre (SOAHAC)

24  
25  
26 851

27  
28 852 **ACKNOWLEDGEMENTS**

29  
30  
31 853 The authors would like to acknowledge Michèle Parent Bergeron and SOAHAC for their  
32  
33  
34 854 contributions to the study.

35  
36 855

37  
38  
39 856



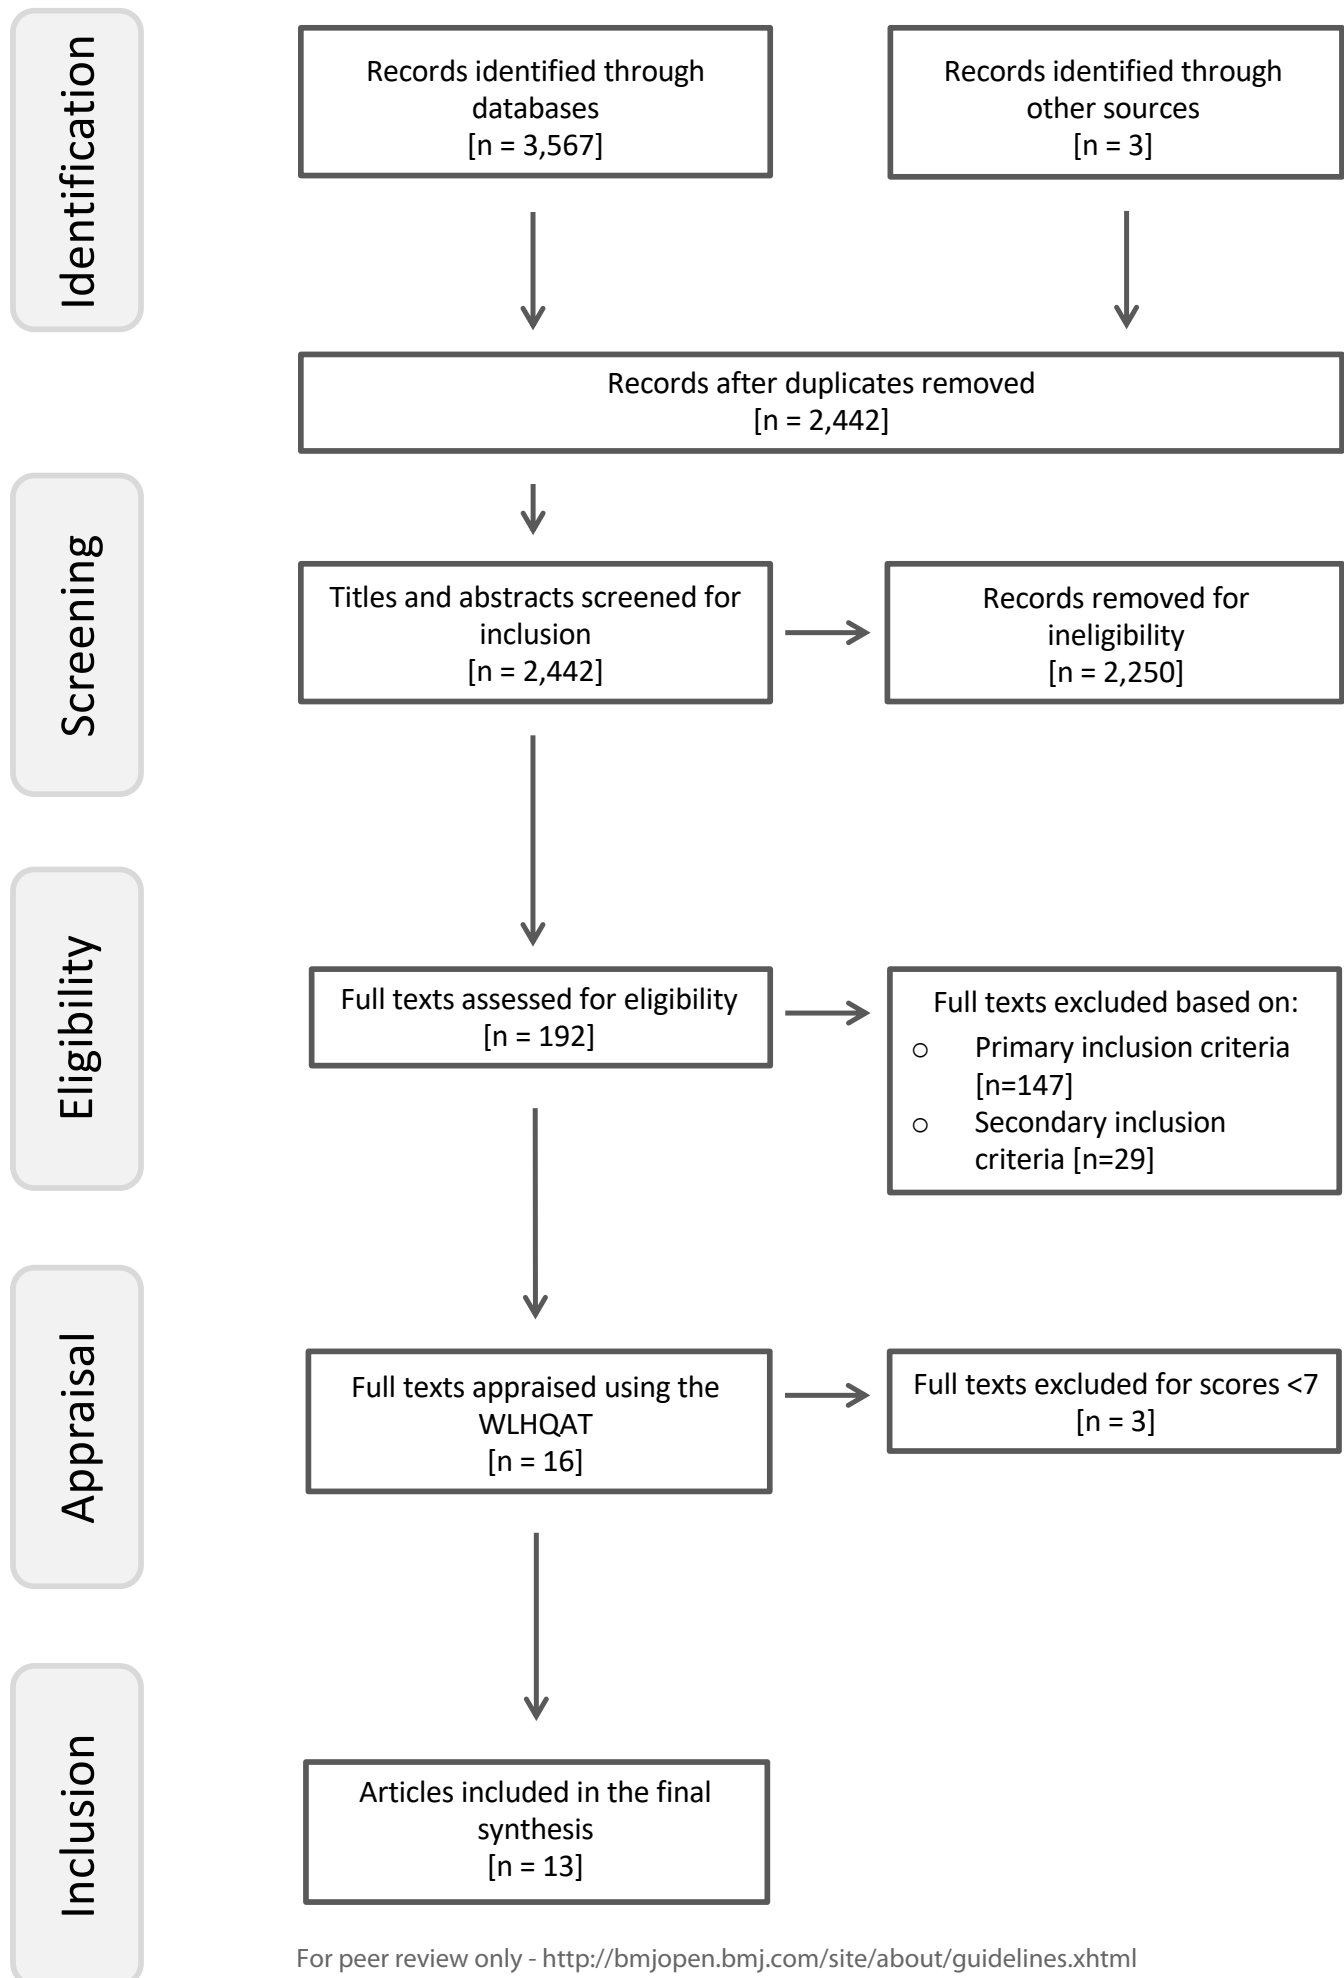

## Supplementary Figure 2

### Search Strategies:

Below are the full search strategies exactly as run on the fourth search update on May 12, 2022. Three previous searches were carried out using these strategies on September 18, 2018; July 30, 201; and March 9, 2021. The first search on September 18, 2018 was limited to articles published from 2006 and on.

### Ovid MEDLINE: Epub Ahead of Print, In-Process & Other Non-Indexed Citations, Ovid MEDLINE® Daily and Ovid MEDLINE® <1946-Present>

1 american native continental ancestry group/ or exp indians, north american/ or inuits/ or  
 2 exp Indigenous Peoples/ 19761  
 3 Oceanic Ancestry Group/ 11661  
 4 United States Indian Health Service/ 596  
 5 Health Services, Indigenous/ 3819  
 6 (Aborigin\* or Indigenous or Eskimo\* or Inuit\* or Inuk\* or Metis or First Nations or First  
 7 Nation or 1st nation or 1st nations or Native Canadian\* or Native American\* or Maori\* or Pacific  
 8 Islander\* or American Indian\* or Amerindian\* or Native Alaska\* or Alaska Native\* or Native  
 9 Hawaiian\* or Torres Strait Islander\* or on-reserve or off-reserve or tribal or autochtone\* or  
 10 amerindien\* or indigene\*).mp. 79690  
 11 6 (indian or indians).ti,ab,kw. 82911  
 12 India/ 115065  
 13 6 not 7 55466  
 14 1 or 2 or 3 or 4 or 5 or 8 128874  
 15 Cultural Competency/ 6278  
 16 Culturally Competent Care/ 2028  
 17 Transcultural Nursing/3442  
 18 cultural diversity/ 12558  
 19 cultural\* competenc\*.tw,kf. 4480  
 20 cultural\* safe\*.tw,kf. 941  
 21 cultural awareness.tw,kf. 717  
 22 cultural\* sensitiv\*.tw,kf. 5526  
 23 cultural\* secur\*.tw,kf.54  
 24 cultural humility.tw,kf. 407  
 25 cross-cultural.tw,kf. 15212  
 26 cultural\* respect\*.tw,kf. 115  
 27 anti-racis\*.tw,kf. 349

1  
2  
3 23 antiracis\*.tw,kf. 312  
4 24 postcolonial\*.tw,kf. 426  
5 25 colonial\*.tw,kf. 7112  
6  
7 26 or/10-25 50752  
8  
9 27 exp Health Personnel/581961  
10 28 "Attitude of Health Personnel"/ 129471  
11 29 "Internship and Residency"/ 57027  
12  
13 30 ((health\* or medical or nurs\* or hospital) adj2 (personnel or provider\* or professional\*  
14 or worker\* or staff or specialist\* or employee\*)).tw,kf. 363535  
15  
16 31 (doctor\* or physician\* or practitioner\* or nurse\* or clinician\* or hospitalist\* or dentist\*  
17 or therapist\* or physiotherapist\* or occupational therapist\* or psychologist\* or psychiatrist\* or  
18 counsel?or\* or social worker\* or midwi\* or paramedic\* or emergency medical technician\* or  
19 pharmacist\* or dietician\* or medic\* resident\*).tw,kf. 1374101  
20  
21 32 or/27-31 1933424  
22  
23 33 Education/ 21493  
24 34 curriculum/ 83087  
25  
26 35 competency-based education/ 4429  
27 36 exp education, professional/ 321367  
28 37 exp Inservice Training/ 29907  
29 38 exp Teaching/ 91371  
30 39 exp Teaching Materials/ 123098  
31 40 exp Health Personnel/ed [Education] 63884  
32 41 cultural competency/ed 961  
33 42 Transcultural Nursing/ed [Education] 864  
34 43 exp Culture/ed [Education] 1033  
35 44 (training or education\* or learn\* or teach\* or workshop\* or curricul\* or pedagog\* or  
36 seminar\*).tw,kf. 1604662  
37 45 (professional development or staff development).tw,kf. 13772  
38 46 or/33-45 1870696  
39  
40 47 9 and 26 and 32 and 46 945  
41 48 limit 47 to english language 934  
42 49 limit 48 to ed=20210308-20220512 123  
43 50 limit 48 to dt=20210308-20220512 111  
44 51 limit 48 to ez=20210308-20220512 111  
45 52 limit 48 to yr="2022 -Current" 50  
46 53 49 or 50 or 51 or 52 157  
47 54 remove duplicates from 53 155  
48  
49  
50  
51  
52  
53  
54  
55  
56  
57  
58  
59  
60

## Embase Classic+Embase &lt;1947 to 2022 May 11&gt;

1 indigenous people/ or alaska native/ or american indian/ or canadian aboriginal/ or first  
 2 nation/ or indigenous australian/ 32329  
 3  
 4  
 5  
 6 1 exp amerind people/ or exp australian aborigine/ or exp eskimo-aleut people/ or exp na-  
 7 dene people/ 7622  
 8  
 9 2 "maori (people)"/ or native hawaiian/ 2383  
 10  
 11 3 exp oceanic ancestry group/ 9022  
 12  
 13 4 indigenous health care/ 1176  
 14  
 15 5 (Aborigin\* or Indigenous or Eskimo\* or Inuit\* or Inuk\* or Metis or First Nations or First  
 16 Nation or 1st nation or 1st nations or Native Canadian\* or Native American\* or Maori\* or Pacific  
 17 Islander\* or American Indian\* or Amerindian\* or Native Alaska\* or Alaska Native\* or Native  
 18 Hawaiian\* or Torres Strait Islander\* or on-reserve or off-reserve or tribal or autochtone\* or  
 19 amerindien\* or indigene\*).ti,ab,kw. 93751  
 20  
 21 6 (indian or indians).ti,ab,kw. 114804  
 22  
 23 7 exp indian/ 40575  
 24  
 25 8 India/ 167974  
 26  
 27 9 8 or 9 201479  
 28  
 29 10 7 not 10 58826  
 30  
 31 11 (or/1-6) or 11 153454  
 32  
 33 12 cultural competence/ 7387  
 34  
 35 13 transcultural care/ 4825  
 36  
 37 14 cultural sensitivity/ 1261  
 38  
 39 15 cultural diversity/ 2692  
 40  
 41 16 cultural\* competenc\*.tw. 4546  
 42  
 43 17 cultural\* safe\*.tw. 1038  
 44  
 45 18 cultural awareness.tw. 839  
 46  
 47 19 cultural\* sensitiv\*.tw. 6598  
 48  
 49 20 cultural\* secur\*.tw. 71  
 50  
 51 21 cultural humility.tw. 426  
 52  
 53 22 cross-cultural.tw. 15606  
 54  
 55 23 cultural\* respect\*.tw. 137  
 56  
 57 24 anti-racis\*.tw. 310  
 58  
 59 25 antiracis\*.tw. 294  
 60  
 61 26 postcolonial\*.tw. 375  
 62  
 63 27 colonial\*.tw. 7139  
 64  
 65 28 or/13-28 45229  
 66  
 67 29 exp health care personnel/ 1856636  
 68  
 69  
 70

1  
2  
3 31 health personnel attitude/ 88298  
4 32 ((health\* or medical or nurs\* or hospital) adj2 (personnel or provider\* or professional\*  
5 or worker\* or staff or specialist\* or employee\*)).tw.478961  
6  
7 33 (doctor\* or physician\* or practitioner\* or nurse\* or clinician\* or hospitalist\* or dentist\*  
8 or therapist\* or physiotherapist\* or occupational therapist\* or psychologist\* or psychiatrist\* or  
9 counsel?or\* or social worker\* or midwi\* or paramedic\* or emergency medical technician\* or  
10 pharmacist\* or dietician\* or medic\* resident\*).tw. 1881277  
11  
12 34 30 or 31 or 32 or 33 3109487  
13  
14 35 education/ or continuing education/ or course content/ or curriculum/ or curriculum  
15 development/ or education program/ or "outcome of education"/ 615015  
16  
17 36 in service training/ 16717  
18  
19 37 teaching/ 108269  
20  
21 38 (training or education\* or learn\* or teach\* or workshop\* or curricul\* or pedagog\* or  
22 seminar\*).tw. 2082644  
23  
24 39 (professional development or staff development).tw. 15840  
25  
26 40 35 or 36 or 37 or 38 or 39 2297974  
27  
28 41 12 and 29 and 34 and 40 930  
29  
30 42 limit 41 to embase 254  
31  
32 43 limit 42 to english language 253  
33  
34 44 limit 43 to dc=20210308-20220512 42

34 **EBM Reviews - Cochrane Central Register of Controlled Trials <April 2022>**

35 **EBM Reviews - Cochrane Database of Systematic Reviews <2005 to May 11, 2022>**

36  
37  
38 1 american native continental ancestry group/ or exp indians, north american/ or inuits/ or  
39 exp Indigenous Peoples/ 327  
40  
41 2 Oceanic Ancestry Group/ 7  
42  
43 3 United States Indian Health Service/ 4  
44  
45 4 Health Services, Indigenous/ 47  
46  
47 5 (Aborigin\* or Indigenous or Eskimo\* or Inuit\* or Inuk\* or Metis or First Nations or First  
48 Nation or 1st nation or 1st nations or Native Canadian\* or Native American\* or Maori\* or Pacific  
49 Islander\* or American Indian\* or Amerindian\* or Native Alaska\* or Alaska Native\* or Native  
50 Hawaiian\* or Torres Strait Islander\* or on-reserve or off-reserve or tribal or autochtone\* or  
51 amerindien\* or indigene\*).mp. 3033  
52  
53 6 (indian or indians).ti,ab,kw. 5091  
54  
55 7 India/ 2437  
56  
57 8 6 not 7 4449  
58  
59  
60

1  
2  
3 9 1 or 2 or 3 or 4 or 5 or 8 6754  
4 10 Cultural Competency/ 190  
5 11 Culturally Competent Care/ 110  
6 12 Transcultural Nursing/14  
7 13 cultural diversity/ 79  
8 14 cultural\* competenc\*.tw,kf. 100  
9 15 cultural\* safe\*.tw,kf. 35  
10 16 cultural awareness.tw,kf. 13  
11 17 cultural\* sensitiv\*.tw,kf. 589  
12 18 cultural\* secur\*.tw,kf.8  
13 19 cultural humility.tw,kf. 11  
14 20 cross-cultural.tw,kf. 357  
15 21 cultural\* respect\*.tw,kf. 8  
16 22 anti-racis\*.tw,kf. 9  
17 23 antiracis\*.tw,kf. 1  
18 24 postcolonial\*.tw,kf. 1  
19 25 colonial\*.tw,kf. 34  
20 26 or/10-25 1413  
21 27 exp Health Personnel/10279  
22 28 "Attitude of Health Personnel"/ 2059  
23 29 "Internship and Residency"/ 1373  
24 30 ((health\* or medical or nurs\* or hospital) adj2 (personnel or provider\* or professional\*  
25 or worker\* or staff or specialist\* or employee\*)).tw,kf. 31086  
26 31 (doctor\* or physician\* or practitioner\* or nurse\* or clinician\* or hospitalist\* or dentist\*  
27 or therapist\* or physiotherapist\* or occupational therapist\* or psychologist\* or psychiatrist\* or  
28 counsel?or\* or social worker\* or midwi\* or paramedic\* or emergency medical technician\* or  
29 pharmacist\* or dietician\* or medic\* resident\*).tw,kf. 147680  
30 32 or/27-31 169128  
31 33 Education/ 608  
32 34 curriculum/ 1584  
33 35 competency-based education/ 89  
34 36 exp education, professional/ 5404  
35 37 exp Inservice Training/ 835  
36 38 exp Teaching/ 4681  
37 39 exp Teaching Materials/ 4501  
38 40 exp Health Personnel/ed [Education] 16  
39 41 cultural competency/ed 0  
40 42 Transcultural Nursing/ed [Education] 0  
41  
42  
43  
44  
45  
46  
47  
48  
49  
50  
51  
52  
53  
54  
55  
56  
57  
58  
59  
60

1  
2  
3 43 exp Culture/ed [Education] 1  
4 44 (training or education\* or learn\* or teach\* or workshop\* or curricul\* or pedagog\* or  
5 seminar\*).tw,kf. 196173  
6  
7 45 (professional development or staff development).tw,kf. 475  
8  
9 46 or/33-45 200177  
10 47 9 and 26 and 32 and 46 47  
11 48 limit 47 to yr="2021 -Current" 6  
12  
13 49 remove duplicates from 48 6  
14  
15

### APA PsycInfo <1806 to May Week 2 2022>

18  
19 1 exp indigenous populations/ 15198  
20 2 tribes/ 1259  
21 3 (Aborigin\* or Indigenous or Eskimo\* or Inuit\* or Inuk\* or Metis or First Nations or First  
22 Nation or 1st nation or 1st nations or Native Canadian\* or Native American\* or Maori\* or Pacific  
23 Islander\* or American Indian\* or Amerindian\* or Native Alaska\* or Alaska Native\* or Native  
24 Hawaiian\* or Torres Strait Islander\* or on-reserve or off-reserve or tribal or autochtone\* or  
25 amerindien\* or indigene\*).tw. 31755  
26  
27 4 ((indian or indians) not india).tw. 15700  
28  
29 5 1 or 2 or 3 or 442412  
30  
31 6 cultural sensitivity/ 7916  
32  
33 7 cultural\* competenc\*.tw. 5610  
34  
35 8 cultural\* safe\*.tw. 369  
36  
37 9 cultural awareness.tw. 1291  
38  
39 10 cultural\* sensitiv\*.tw. 6987  
40  
41 11 cultural\* secur\*.tw. 29  
42  
43 12 cultural humility.tw. 482  
44  
45 13 cross-cultural.tw. 37152  
46  
47 14 cultural\* respect\*.tw. 101  
48  
49 15 anti-racis\*.tw. 836  
50  
51 16 antiracis\*.tw. 650  
52  
53 17 postcolonial\*.tw. 2067  
54  
55 18 colonial\*.tw. 6809  
56  
57 19 or/6-18 62234  
58  
59 20 exp health personnel attitudes/ 25839  
60  
61 21 medical residency/ 4825  
62  
63 22 ((health\* or medical or nurs\* or hospital) adj2 (personnel or provider\* or professional\*  
64 or worker\* or staff or specialist\* or employee\*)).tw.122311  
65  
66  
67  
68  
69  
70

23 (doctor\* or physician\* or practitioner\* or nurse\* or clinician\* or hospitalist\* or dentist\*  
 24 or therapist\* or physiotherapist\* or occupational therapist\* or psychologist\* or psychiatrist\* or  
 25 counsel?or\* or social worker\* or midwi\* or paramedic\* or emergency medical technician\* or  
 26 pharmacist\* or dietician\* or medic\* resident\*).tw. 579592  
 27 20 or 21 or 22 or 23 654864  
 28 education/ 40342  
 29 curriculum/ or curriculum development/ 34802  
 30 exp continuing education/ or professional development/ 26018  
 31 educational programs/ or educational program evaluation/ or multicultural education/  
 32 36396  
 33 personnel training/ or sensitivity training/ 11256  
 34 training/ or communication skills training/ or sensitivity training/ 27011  
 35 exp teaching/ 131059  
 36 (training or education\* or learn\* or teach\* or workshop\* or curricul\* or pedagog\* or  
 37 seminar\*).tw. 1241080  
 38 (professional development or staff development).tw. 27110  
 39 or/25-33 1267277  
 40 5 and 19 and 24 and 34 599  
 limit 35 to (chapter or "column/opinion" or "comment/reply" or editorial or letter or  
 review-book or review-media or review-software & other) 96  
 35 35 not 36 503  
 36 limit 37 to english language 484  
 37 limit 38 to up=20210308-20220512 41  
 38 remove duplicates from 39 41

### CINAHL Search History

Interface - EBSCOhost Research Databases

Search Screen - Advanced Search

Database - CINAHL Complete

| #   | Query                | Limiters/Expanders                                                     | Results |
|-----|----------------------|------------------------------------------------------------------------|---------|
| S31 | S29 AND S30          | Expanders - Apply equivalent subjects<br>Search modes - Boolean/Phrase | 109     |
| S30 | EM 20210308-20220512 | Expanders - Apply equivalent subjects                                  | 474,059 |



|     |                                                                                                |                                                                                                       |           |
|-----|------------------------------------------------------------------------------------------------|-------------------------------------------------------------------------------------------------------|-----------|
|     |                                                                                                | Search modes - Boolean/Phrase                                                                         |           |
| S29 | S22 OR S26                                                                                     | Limiters - English Language<br>Expanders - Apply equivalent subjects<br>Search modes - Boolean/Phrase | 1,304     |
| S28 | S27                                                                                            | Search modes - Boolean/Phrase                                                                         | 1,173     |
| S27 | S22 OR S26                                                                                     | Limiters - Published Date: 20060101-20181231; English Language<br>Search modes - Boolean/Phrase       | 709       |
| S26 | S6 AND S25                                                                                     | Search modes - Boolean/Phrase                                                                         | 95        |
| S25 | S23 OR S24                                                                                     | Search modes - Boolean/Phrase                                                                         | 1,087     |
| S24 | (MH "Cultural Safety/ED")                                                                      | Search modes - Boolean/Phrase                                                                         | 38        |
| S23 | (MH "Cultural Competence/ED")                                                                  | Search modes - Boolean/Phrase                                                                         | 1,049     |
| S22 | S6 AND S12 AND S17 AND S21                                                                     | Search modes - Boolean/Phrase                                                                         | 1,144     |
| S21 | S18 OR S19 OR S20                                                                              | Search modes - Boolean/Phrase                                                                         | 1,285,878 |
| S20 | (professional development or staff development)                                                | Search modes - Boolean/Phrase                                                                         | 73,618    |
| S19 | (training or education* or learn* or teach* or workshop* or curricul* or pedagog* or seminar*) | Search modes - Boolean/Phrase                                                                         | 1,144,026 |

|     |                                                                                                                                                                                                                                                                                                                                        |                               |           |
|-----|----------------------------------------------------------------------------------------------------------------------------------------------------------------------------------------------------------------------------------------------------------------------------------------------------------------------------------------|-------------------------------|-----------|
| S18 | (MH "Education") OR (MH "Curriculum+") OR (MH "Education, Competency-Based") OR (MH "Teaching") OR (MH "Teaching Materials+") OR (MH "Teaching Methods+")                                                                                                                                                                              | Search modes - Boolean/Phrase | 293,141   |
| S17 | S13 OR S14 OR S15 OR S16                                                                                                                                                                                                                                                                                                               | Search modes - Boolean/Phrase | 1,524,544 |
| S16 | (doctor* or physician* or practitioner* or nurse* or clinician* or hospitalist* or dentist* or therapist* or physiotherapist* or occupational therapist* or psychologist* or psychiatrist* or counsel?or* or social worker* or midwi* or paramedic* or emergency medical technician* or pharmacist* or dietician* or medic* resident*) | Search modes - Boolean/Phrase | 1,220,148 |
| S15 | ((health* or medical or nurs* or hospital) N2 (personnel or provider* or professional* or worker* or staff or specialist* or employee*))                                                                                                                                                                                               | Search modes - Boolean/Phrase | 375,539   |
| S14 | (MH "Attitude of Health Personnel+")                                                                                                                                                                                                                                                                                                   | Search modes - Boolean/Phrase | 114,454   |
| S13 | (MH "Health Personnel+")                                                                                                                                                                                                                                                                                                               | Search modes - Boolean/Phrase | 627,401   |
| S12 | S7 OR S8 OR S9 OR S10 OR S11                                                                                                                                                                                                                                                                                                           | Search modes - Boolean/Phrase | 51,961    |
| S11 | cultural* competenc* or cultural* safe* or cultural awareness or cultural* sensitiv* or cultural* secur* or cultural humility or cross-cultural or cultural* respect* or anti-racis* or antiracis* or postcolonial* or colonial*                                                                                                       | Search modes - Boolean/Phrase | 31,303    |
| S10 | (MH "Cultural Diversity") OR (MH "Cultural Values")                                                                                                                                                                                                                                                                                    | Search modes - Boolean/Phrase | 24,283    |
| S9  | (MH "Transcultural Care")                                                                                                                                                                                                                                                                                                              | Search modes - Boolean/Phrase | 3,296     |
| S8  | (MH "Cultural Safety")                                                                                                                                                                                                                                                                                                                 | Search modes - Boolean/Phrase | 778       |

|    |                                                                                                                                                                                                                                                                                                                                                                                                               |                               |        |
|----|---------------------------------------------------------------------------------------------------------------------------------------------------------------------------------------------------------------------------------------------------------------------------------------------------------------------------------------------------------------------------------------------------------------|-------------------------------|--------|
| S7 | (MH "Cultural Competence")                                                                                                                                                                                                                                                                                                                                                                                    | Search modes - Boolean/Phrase | 11,142 |
| S6 | S1 OR S2 OR S5                                                                                                                                                                                                                                                                                                                                                                                                | Search modes - Boolean/Phrase | 55,137 |
| S5 | S3 NOT S4                                                                                                                                                                                                                                                                                                                                                                                                     | Search modes - Boolean/Phrase | 12,493 |
| S4 | (MH "India")                                                                                                                                                                                                                                                                                                                                                                                                  | Search modes - Boolean/Phrase | 42,378 |
| S3 | TI ( (indian or indians) ) OR AB ( (indian or indians) )                                                                                                                                                                                                                                                                                                                                                      | Search modes - Boolean/Phrase | 22,181 |
| S2 | (Aborigin* or Indigenous or Eskimo* or Inuit* or Inuk* or Metis or First Nations or First Nation or 1st nation or 1st nations or Native Canadian* or Native American* or Maori* or Pacific Islander* or American Indian* or Amerindian* or Native Alaska* or Alaska Native* or Native Hawaiian* or Torres Strait Islander* or on-reserve or off-reserve or tribal or autochtone* or amerindien* or indigene*) | Search modes - Boolean/Phrase | 47,753 |
| S1 | (MH "Indigenous Peoples+") OR (MH "Health Services, Indigenous") OR (MH "Indigenous Health")                                                                                                                                                                                                                                                                                                                  | Search modes - Boolean/Phrase | 23,870 |

## ProQuest Search Strategy

### Search Strategy

| Set# | Searched for                                                                                                                                                                                                                                                                                                                                                             | Databases                                                                                                                                                                         | Results |
|------|--------------------------------------------------------------------------------------------------------------------------------------------------------------------------------------------------------------------------------------------------------------------------------------------------------------------------------------------------------------------------|-----------------------------------------------------------------------------------------------------------------------------------------------------------------------------------|---------|
| S1   | noft((Aborigin* OR Indigenous OR Eskimo* OR Inuit* OR Inuk* OR Metis OR First Nations OR First Nation OR 1st nation OR 1st nations OR "Native Canadian*" OR "Native American*" OR Maori* OR "Pacific Islander*" OR "American Indian*" OR Amerindian* OR "Native Alaska*" OR "Alaska Native*" OR "Native Hawaiian*" OR "Torres Strait Islander*" OR "on-reserve" OR "off- | Applied Social Sciences Index & Abstracts (ASSIA), ERIC, International Bibliography of the Social Sciences (IBSS), ProQuest Dissertations & Theses Global, Sociological Abstracts | 7452    |

1  
2  
3  
4  
5  
6  
7  
8  
9  
10  
11  
12  
13  
14  
15  
16  
17  
18  
19  
20  
21  
22  
23  
24  
25  
26  
27  
28  
29  
30  
31  
32  
33  
34  
35  
36  
37  
38  
39  
40  
41  
42  
43  
44  
45  
46  
47  
48  
49  
50  
51  
52  
53  
54  
55  
56  
57  
58  
59  
60

|    |                                                                                                                                                                                                                                                                                                                                                                                                                                                       |                                                                                                                                                                                   |        |
|----|-------------------------------------------------------------------------------------------------------------------------------------------------------------------------------------------------------------------------------------------------------------------------------------------------------------------------------------------------------------------------------------------------------------------------------------------------------|-----------------------------------------------------------------------------------------------------------------------------------------------------------------------------------|--------|
|    | reserve" OR tribal OR autochtone* OR amerindien* OR indigene*) AND la.exact("English") AND pd(>20201231)                                                                                                                                                                                                                                                                                                                                              |                                                                                                                                                                                   |        |
| S2 | noft(("cultural* competenc*" OR "cultural* safe*" OR "cultural awareness" OR "cultural* sensitiv*" OR "cultural* secur*" OR "cultural humility" OR "cross-cultural" OR "cultural* respect*" OR "anti-racis*" OR antiracis* OR postcolonial* OR colonial*)) AND la.exact("English") AND pd(>20201231)                                                                                                                                                  | Applied Social Sciences Index & Abstracts (ASSIA), ERIC, International Bibliography of the Social Sciences (IBSS), ProQuest Dissertations & Theses Global, Sociological Abstracts | 10129  |
| S3 | noft((health* OR medical OR nurs* OR hospital) NEAR/2 (personnel OR provider* OR professional* OR worker* OR staff OR specialist* OR employee*)) AND la.exact("English") AND pd(>20201231)                                                                                                                                                                                                                                                            | Applied Social Sciences Index & Abstracts (ASSIA), ERIC, International Bibliography of the Social Sciences (IBSS), ProQuest Dissertations & Theses Global, Sociological Abstracts | 10349  |
| S4 | noft((((doctor* OR physician* OR practitioner* OR nurse* OR clinician* OR hospitalist* OR dentist* OR therapist* OR physiotherapist* OR ("occupational therapist" OR "occupational therapists") OR psychologist* OR psychiatrist* OR counsellor* OR ("social worker" OR "social workers") OR midwi* OR paramedic* OR "emergency medical technician*" OR pharmacist* OR dietician* OR "medic* resident*")))) AND la.exact("English") AND pd(>20201231) | Applied Social Sciences Index & Abstracts (ASSIA), ERIC, International Bibliography of the Social Sciences (IBSS), ProQuest Dissertations & Theses Global, Sociological Abstracts | 31501  |
| S5 | noft(((training OR education* OR learn* OR teach* OR workshop* OR curricul* OR pedagog* OR seminar* OR "professional development" OR "staff development")))) AND la.exact("English") AND pd(>20201231)                                                                                                                                                                                                                                                | Applied Social Sciences Index & Abstracts (ASSIA), ERIC, International Bibliography of the Social Sciences (IBSS), ProQuest Dissertations & Theses Global, Sociological Abstracts | 115033 |
| S6 | (S1 AND S2 AND (S3 OR S4) AND S5)                                                                                                                                                                                                                                                                                                                                                                                                                     | Applied Social Sciences Index & Abstracts (ASSIA), ERIC, International Bibliography of the Social Sciences (IBSS), ProQuest Dissertations & Theses Global, Sociological Abstracts | 77     |

## Bibliography of Indigenous Peoples in North America (EBSCOhost)

### 2 Results

(( ((health\* or medical or nurs\* or hospital) N2 (personnel or provider\* or professional\* or worker\* or staff or specialist\* or employee\*)) ) OR ( (doctor\* or physician\* or practitioner\* or nurse\* or clinician\* or hospitalist\* or dentist\* or therapist\* or physiotherapist\* or occupational therapist\* or psychologist\* or psychiatrist\* or counsel?or\* or social worker\* or midwi\* or paramedic\* or emergency medical technician\* or pharmacist\* or dietician\* or medic\* resident\*) ))

AND

( ("cultural\* competenc\*" or "cultural\* safe\*" or "cultural awareness" or "cultural\* sensitiv\*" or "cultural\* secur\*" or "cultural humility" or "cross-cultural" or "cultural\* respect\*" or "anti-racis\*" or antiracis\*) )

AND

( (training or education\* or learn\* or teach\* or workshop\* or curricul\* or pedagog\* or seminar\* or "professional development" or "staff development") )

Limit to 2021-2022, English Language, Academic Journals

### Web of Science

Science Citation Index Expanded (SCI-EXPANDED)

Social Sciences Citation Index (SSCI)

93 Results

((TS=("cultural\* competenc\*" or "cultural\* safe\*" or "cultural awareness" or "cultural\* sensitiv\*" or "cultural\* secur\*" or "cultural humility" or "cross-cultural" or "cultural\* respect\*" or "anti-racis\*" or antiracis\*) AND TS=(training or education\* or learn\* or teach\* or workshop\* or curricul\* or pedagog\* or seminar\* or "professional development" or "staff development") AND TS=(Aborigin\* or Indigenous or Eskimo\* or Inuit\* or Inuk\* or Metis or First Nations or First Nation or 1st nation or 1st nations or Native Canadian\* or Native American\* or Maori\* or Pacific Islander\* or American Indian\* or Amerindian\* or Native Alaska\* or Alaska Native\* or Native Hawaiian\* or Torres Strait Islander\* or on-reserve or off-reserve or tribal or autochtone\* or amerindien\* or indigene\*) AND TS=("health care" or healthcare or hospital\* or medical or nurses or doctors)))

Timespan: 2021-03-08 to 2022-05-12 (Index Date)

## Supplementary Figure 3

## Well Living House Quality Appraisal Tool

Citation (Title, Author, Date) [INSERT FOR EACH STUDY]

Local Community Relevance of Method and Measures (Score out of 4)

|                                                                                                                                                         |                                                                                                                                                                                                                                                                                                                                                                                                                                                                                                             |
|---------------------------------------------------------------------------------------------------------------------------------------------------------|-------------------------------------------------------------------------------------------------------------------------------------------------------------------------------------------------------------------------------------------------------------------------------------------------------------------------------------------------------------------------------------------------------------------------------------------------------------------------------------------------------------|
| Did the measures of success reflect local Indigenous community understandings of success?                                                               | <p>Yes = 2 (look for: outcomes are derived from community members/ are the outcomes reflecting indigenous concepts evidence provided explicitly in the text where did evaluation take place, who collected evaluation data?)</p> <p>Partial = 1 (hints of including local community values/beliefs/knowledge systems in text and therefore assumption made by reviewers that evidence is present)</p> <p>No = 0 (nothing was said or author(s) indicated that success was not defined by the community)</p> |
| Had methods and tools been tested and validated previously in a similar Indigenous context and reviewed for relevance by appropriate community members? | <p>Yes = 2 (evidence is provided explicitly in text)</p> <p>Partial = 1 (hints of using a tool that has been used in Indigenous contexts and therefore assumption made by reviewers that evidence is present)</p> <p>No = 0 (nothing was said or author(s) said that the evaluation method/tool has not been used in Indigenous contexts)</p>                                                                                                                                                               |

Rigour and internal validity of the evaluation method (Score out of 4)

|                                                                                        |                                                                                                                                                                                                                                                                                                                                                                                                                                                                                                                                                                                                                                                                                                                                                                |
|----------------------------------------------------------------------------------------|----------------------------------------------------------------------------------------------------------------------------------------------------------------------------------------------------------------------------------------------------------------------------------------------------------------------------------------------------------------------------------------------------------------------------------------------------------------------------------------------------------------------------------------------------------------------------------------------------------------------------------------------------------------------------------------------------------------------------------------------------------------|
| Do the quantitative or qualitative methods meet relevant rigour and internal validity? | <p>Excellent = 4<br/>Fair = 3<br/>Barely Acceptable = 2<br/>Poor = 1</p> <p>Generally: Is the study design appropriate for evaluation research question(s)? Are the conclusions supported and justified by the results?</p> <p><u>Quantitative</u>: Is the sample size described and justified? Are the instruments/tools already validated?</p> <p>Are threats to validity addressed (such as confounding factors)?</p> <p><u>Qualitative</u>: Are the participants selected using appropriate strategies (such as purposive sample or until saturation is reached)? Is there clearly articulated theoretical approach/methodology/ data collection methods and analytic lens – do these fit together? Is there evidence of truthfulness of the findings?</p> |
|----------------------------------------------------------------------------------------|----------------------------------------------------------------------------------------------------------------------------------------------------------------------------------------------------------------------------------------------------------------------------------------------------------------------------------------------------------------------------------------------------------------------------------------------------------------------------------------------------------------------------------------------------------------------------------------------------------------------------------------------------------------------------------------------------------------------------------------------------------------|

Strength of the Evidence (score out of 4)

|                         |                                                                                                                                                                                                                                                                                                                        |
|-------------------------|------------------------------------------------------------------------------------------------------------------------------------------------------------------------------------------------------------------------------------------------------------------------------------------------------------------------|
| Is the evidence strong? | <p>Excellent = 4<br/>Fair = 3<br/>Barely Acceptable = 2<br/>Poor = 1</p> <p><u>Quantitative</u>: Does the evidence have adequate power and statistical significance? Is the response rate reasonable?</p> <p><u>Qualitative</u>: Are there major and convincing themes from triangulation, and/or member checking?</p> |
|-------------------------|------------------------------------------------------------------------------------------------------------------------------------------------------------------------------------------------------------------------------------------------------------------------------------------------------------------------|

Total Score:

## Supplementary File 1 – Study Screening Protocol

Screening Protocol

**Working Title:** Wise practices – what we know about the design and implementation of Indigenous cultural safety training programs for service providers: a scoping review

**Primary Research Question:** What are the impacts of Indigenous cultural safety, competency or other educational interventions on non-Indigenous health and social service providers' knowledge, attitudes, and culturally safe practices

**Secondary Research Questions:** Are there specific training approaches, strategies, formats or content

**Date:** October 1, 2018

**Screening software:** colandr <https://colandrapp.com/signin> OR abstrackr <http://abstrackr.cebm.brown.edu/>

**Level 1 Screening: Titles and Abstracts**

|                                                                                                                                                                                                                                    | Yes | No | Unclear |
|------------------------------------------------------------------------------------------------------------------------------------------------------------------------------------------------------------------------------------|-----|----|---------|
| Does the title/abstract indicate that the article is specific to <u>Indigenous contexts</u> in what is now known as Canada, the United States, Australia, or New Zealand?                                                          |     |    |         |
| Does the title/abstract indicate that the article explores <u>educational interventions (workshops, training, coursework, sessions, etc.)</u> that are designed/implemented to improve cultural safety, cultural competency, etc.? |     |    |         |
| Does the title/abstract indicate that the article focuses on education for <u>adult learners who provide services</u> (e.g. health services) to Indigenous peoples?                                                                |     |    |         |

- If all yes, include
- If all yes and some unclear, include
- If one no, exclude

## Supplementary File 1 – Study Screening Protocol

## Level 2 Screening: Full-Text

|                                                                                                                                                                                                                                                   | Yes | No | Unclear |
|---------------------------------------------------------------------------------------------------------------------------------------------------------------------------------------------------------------------------------------------------|-----|----|---------|
| Is the article specific to <u>Indigenous contexts</u> in what is now known as Canada, the United States, Australia, or New Zealand?                                                                                                               |     |    |         |
| Does the article explore <u>educational interventions (workshops, training, coursework, sessions, etc.)</u> that are designed/implemented to improve cultural safety, cultural competency, etc.?                                                  |     |    |         |
| Does the article focus on education for <u>adult</u> learners who <u>provide services</u> (e.g. health services) to Indigenous peoples?                                                                                                           |     |    |         |
| Does the article include a <u>information about outcomes</u> for the educational intervention (definition of outcome is broadly defined and can include, for example, microaggression scales, academic understanding, anti-racist measures etc.)? |     |    |         |

- If all yes, include
- If one no, exclude



Supplementary File 2

## Data Extraction Form for Indigenous Cultural Safety Education for Healthcare Providers

|                                                                                                                                                                          |  |             |
|--------------------------------------------------------------------------------------------------------------------------------------------------------------------------|--|-------------|
| Reviewer Name:                                                                                                                                                           |  |             |
| Authors:                                                                                                                                                                 |  |             |
| Year:                                                                                                                                                                    |  |             |
| Title:                                                                                                                                                                   |  |             |
| Journal:                                                                                                                                                                 |  |             |
| <b>Study Characteristics</b>                                                                                                                                             |  | <i>Page</i> |
| Type of publication (manuscript, report, etc.)                                                                                                                           |  |             |
| Type of study (quantitative, qualitative, mixed methods)                                                                                                                 |  |             |
| Study Design (RCT, quasi-experimental, qualitative)                                                                                                                      |  |             |
| Location and time frame                                                                                                                                                  |  |             |
| Aim of the study                                                                                                                                                         |  |             |
| <b>Population</b>                                                                                                                                                        |  | <i>Page</i> |
| Discipline                                                                                                                                                               |  |             |
| Sampling & recruitment method                                                                                                                                            |  |             |
| Inclusion and exclusion criteria                                                                                                                                         |  |             |
| Data sources (primary/secondary data)                                                                                                                                    |  |             |
| Notes:                                                                                                                                                                   |  |             |
| <b>Cultural Safety</b>                                                                                                                                                   |  | <i>Page</i> |
| Does the article apply a definition of cultural safety, competency or sensitivity that includes addressing/eliminating anti-Indigenous racism, bias and/or stereotyping? |  |             |
| Is this applied to the intervention?                                                                                                                                     |  |             |
| Does the article apply an anti-racist focus in the design and/or implementation of cultural safety, competency, etc. interventions?                                      |  |             |
| Is it applied to the intervention?                                                                                                                                       |  |             |

## Supplementary File 2

|    |                                       |             |
|----|---------------------------------------|-------------|
| 1  | Notes:                                |             |
| 2  |                                       |             |
| 3  |                                       |             |
| 4  |                                       |             |
| 5  |                                       |             |
| 6  | <b>Intervention detail</b>            | <i>Page</i> |
| 7  | Type of intervention:                 |             |
| 8  | psychological, psychosocial,          |             |
| 9  | educational and alternative           |             |
| 10 | interventions                         |             |
| 11 | Cultural component to                 |             |
| 12 | intervention                          |             |
| 13 | <b>Brief Name:</b> name/phrase that   |             |
| 14 | describes intervention                |             |
| 15 |                                       |             |
| 16 | <b>Why:</b> describe rationale, goal, |             |
| 17 | theory or elements essential to       |             |
| 18 | the intervention                      |             |
| 19 | <b>What - Materials:</b> Describe     |             |
| 20 | any physical or informational         |             |
| 21 | materials used in the                 |             |
| 22 | intervention, including those         |             |
| 23 | provided to participants or           |             |
| 24 | used in intervention delivery         |             |
| 25 | or in training of intervention        |             |
| 26 | providers. Provide information        |             |
| 27 | on where the materials can be         |             |
| 28 | accessed (e.g. online                 |             |
| 29 | appendix, URL).                       |             |
| 30 |                                       |             |
| 31 | <b>Procedures:</b> Describe each of   |             |
| 32 | the procedures, activities,           |             |
| 33 | and/or processes used in the          |             |
| 34 | intervention, including any           |             |
| 35 | enabling or support activities.       |             |
| 36 |                                       |             |
| 37 | <b>Who:</b> For each category of      |             |
| 38 | intervention provider (e.g.           |             |
| 39 | psychologist, nursing                 |             |
| 40 | assistant), describe their            |             |
| 41 | expertise, background and any         |             |
| 42 | specific training given.              |             |
| 43 |                                       |             |
| 44 | <b>How:</b> Describe the modes of     |             |
| 45 | delivery (e.g. face-to-face or        |             |
| 46 | by some other mechanism,              |             |
| 47 | such as internet or telephone)        |             |
| 48 | of the intervention and               |             |
| 49 | whether it was provided               |             |
| 50 | individually or in a group.           |             |
| 51 |                                       |             |
| 52 | <b>Where:</b> Describe the type(s)    |             |
| 53 | of location(s) where the              |             |
| 54 | intervention occurred,                |             |
| 55 | including any necessary               |             |
| 56 | infrastructure or relevant            |             |
| 57 | features.                             |             |
| 58 |                                       |             |
| 59 | <b>When and How:</b> Describe the     |             |
| 60 | number of times the                   |             |
|    | intervention was delivered and        |             |

Supplementary File 2

|                                              |                                                                                                                                                                                         |                   |                                   |
|----------------------------------------------|-----------------------------------------------------------------------------------------------------------------------------------------------------------------------------------------|-------------------|-----------------------------------|
| 1<br>2<br>3<br>4<br>5<br>6                   | over what period of time including the number of sessions, their schedule, and their duration, intensity or dose.                                                                       |                   |                                   |
| 7<br>8<br>9<br>10<br>11                      | <b>Tailoring:</b> If the intervention was planned to be personalised, titrated or adapted, then describe what, why, when, and how.                                                      |                   |                                   |
| 12<br>13<br>14<br>15<br>16                   | <b>Modifications:</b> If the intervention was modified during the course of the study, describe the changes (what, why, when, and how).                                                 |                   |                                   |
| 17<br>18<br>19<br>20<br>21<br>22<br>23<br>24 | <b>How well: Planned:</b> If intervention adherence or fidelity was assessed, describe how and by whom, and if any strategies were used to maintain or improve fidelity, describe them. |                   |                                   |
| 25<br>26<br>27<br>28<br>29                   | <b>Actual:</b> If intervention adherence or fidelity was assessed, describe the extent to which the intervention was delivered as planned.                                              |                   |                                   |
| 30                                           | <b>Evaluation</b>                                                                                                                                                                       |                   | <i>Page</i>                       |
| 31<br>32<br>33                               | Type of study (RCT, case study, etc.)                                                                                                                                                   |                   |                                   |
| 34<br>35                                     | Brief methods overview                                                                                                                                                                  |                   |                                   |
| 36<br>37<br>38                               | Data collection tools/methods                                                                                                                                                           |                   |                                   |
| 39<br>40<br>41<br>42                         | Outcome measure description (primary and secondary)                                                                                                                                     |                   |                                   |
| 43<br>44<br>45                               | Outcome specific to client level change (y/n)                                                                                                                                           |                   |                                   |
| 46<br>47                                     | Outcome specific to clinician level change (y/n)                                                                                                                                        |                   |                                   |
| 48<br>49<br>50                               | Outcome specific to institutional level change (y/n)                                                                                                                                    |                   |                                   |
| 51<br>52<br>53<br>54<br>55                   | Notes:                                                                                                                                                                                  |                   |                                   |
| 56                                           | <b>Results</b>                                                                                                                                                                          |                   |                                   |
| 57<br>58                                     |                                                                                                                                                                                         | <i>individual</i> | <i>institutional</i> <i>other</i> |
| 59                                           | Cultural safety outcome                                                                                                                                                                 |                   |                                   |

1  
2  
3  
4  
5  
6  
7  
8  
9  
10  
11  
12  
13  
14  
15  
16  
17  
18  
19  
20  
21  
22  
23  
24  
25  
26  
27  
28  
29  
30  
31  
32  
33  
34  
35  
36  
37  
38  
39  
40  
41  
42  
43  
44  
45  
46  
47  
48  
49  
50  
51  
52  
53  
54  
55  
56  
57  
58  
59  
60

Supplementary File 2

|   |                          |  |  |  |
|---|--------------------------|--|--|--|
| 1 | Other outcome            |  |  |  |
| 2 | <b>Other Information</b> |  |  |  |
| 3 |                          |  |  |  |
| 4 | Authors' conclusions     |  |  |  |

1  
2  
3  
4  
5  
6  
7  
8  
9  
10  
11  
12  
13  
14  
15  
16  
17  
18  
19  
20  
21  
22  
23  
24  
25  
26  
27  
28  
29  
30  
31  
32  
33  
34  
35  
36  
37  
38  
39  
40  
41  
42  
43  
44  
45  
46  
47  
48  
49  
50  
51  
52  
53  
54  
55  
56  
57  
58  
59  
60

For peer review only



## PRISMA 2020 Checklist

| Section and Topic             | Item # | Checklist item                                                                                                                                                                                                                                                                                       | Location where item is reported |
|-------------------------------|--------|------------------------------------------------------------------------------------------------------------------------------------------------------------------------------------------------------------------------------------------------------------------------------------------------------|---------------------------------|
| <b>TITLE</b>                  |        |                                                                                                                                                                                                                                                                                                      |                                 |
| Title                         | 1      | Identify the report as a systematic review.                                                                                                                                                                                                                                                          | pg.1                            |
| <b>ABSTRACT</b>               |        |                                                                                                                                                                                                                                                                                                      |                                 |
| Abstract                      | 2      | See the PRISMA 2020 for Abstracts checklist.                                                                                                                                                                                                                                                         | pg. 2-3                         |
| <b>INTRODUCTION</b>           |        |                                                                                                                                                                                                                                                                                                      |                                 |
| Rationale                     | 3      | Describe the rationale for the review in the context of existing knowledge.                                                                                                                                                                                                                          | pg. 3-5                         |
| Objectives                    | 4      | Provide an explicit statement of the objective(s) or question(s) the review addresses.                                                                                                                                                                                                               | pg. 5                           |
| <b>METHODS</b>                |        |                                                                                                                                                                                                                                                                                                      |                                 |
| Eligibility criteria          | 5      | Specify the inclusion and exclusion criteria for the review and how studies were grouped for the syntheses.                                                                                                                                                                                          | pg. 10-11                       |
| Information sources           | 6      | Specify all databases, registers, websites, organisations, reference lists and other sources searched or consulted to identify studies. Specify the date when each source was last searched or consulted.                                                                                            | pg. 5 & 10                      |
| Search strategy               | 7      | Present the full search strategies for all databases, registers and websites, including any filters and limits used.                                                                                                                                                                                 | Suppl. Fig. 1                   |
| Selection process             | 8      | Specify the methods used to decide whether a study met the inclusion criteria of the review, including how many reviewers screened each record and each report retrieved, whether they worked independently, and if applicable, details of automation tools used in the process.                     | pg. 10-12                       |
| Data collection process       | 9      | Specify the methods used to collect data from reports, including how many reviewers collected data from each report, whether they worked independently, any processes for obtaining or confirming data from study investigators, and if applicable, details of automation tools used in the process. | pg. 10-12 & Suppl. Files 1 & 2  |
| Data items                    | 10a    | List and define all outcomes for which data were sought. Specify whether all results that were compatible with each outcome domain in each study were sought (e.g. for all measures, time points, analyses), and if not, the methods used to decide which results to collect.                        | pg. 10-12                       |
|                               | 10b    | List and define all other variables for which data were sought (e.g. participant and intervention characteristics, funding sources). Describe any assumptions made about any missing or unclear information.                                                                                         | pg. 10-12                       |
| Study risk of bias assessment | 11     | Specify the methods used to assess risk of bias in the included studies, including details of the tool(s) used, how many reviewers assessed each study and whether they worked independently, and if applicable, details of automation tools used in the process.                                    | pg. 10-12; Suppl. Files 1 & 2   |
| Effect measures               | 12     | Specify for each outcome the effect measure(s) (e.g. risk ratio, mean difference) used in the synthesis or presentation of results.                                                                                                                                                                  | N/A                             |
| Synthesis methods             | 13a    | Describe the processes used to decide which studies were eligible for each synthesis (e.g. tabulating the study intervention characteristics and comparing against the planned groups for each synthesis (item #5)).                                                                                 | pg. 11-12                       |
|                               | 13b    | Describe any methods required to prepare the data for presentation or synthesis, such as handling of missing summary statistics, or data conversions.                                                                                                                                                | N/A                             |
|                               | 13c    | Describe any methods used to tabulate or visually display results of individual studies and syntheses.                                                                                                                                                                                               | N/A                             |
|                               | 13d    | Describe any methods used to synthesize results and provide a rationale for the choice(s). If meta-analysis was performed, describe the model(s), method(s) to identify the presence and extent of statistical heterogeneity, and software package(s) used.                                          | pg. 14-15                       |
|                               | 13e    | Describe any methods used to explore possible causes of heterogeneity among study results (e.g. subgroup analysis, meta-regression).                                                                                                                                                                 | N/A                             |
|                               | 13f    | Describe any sensitivity analyses conducted to assess robustness of the synthesized results.                                                                                                                                                                                                         | N/A                             |
| Reporting bias assessment     | 14     | Describe any methods used to assess risk of bias due to missing results in a synthesis (arising from reporting biases).                                                                                                                                                                              | N/A                             |

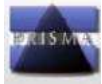

## PRISMA 2020 Checklist

| Section and Topic                              | Item # | Checklist item                                                                                                                                                                                                                                                                       | Location where item is reported             |
|------------------------------------------------|--------|--------------------------------------------------------------------------------------------------------------------------------------------------------------------------------------------------------------------------------------------------------------------------------------|---------------------------------------------|
| Certainty assessment                           | 15     | Describe any methods used to assess certainty (or confidence) in the body of evidence for an outcome.                                                                                                                                                                                | N/A                                         |
| <b>RESULTS</b>                                 |        |                                                                                                                                                                                                                                                                                      |                                             |
| Study selection                                | 16a    | Describe the results of the search and selection process, from the number of records identified in the search to the number of studies included in the review, ideally using a flow diagram.                                                                                         | pg. 15 & Suppl. Fig. 1                      |
|                                                | 16b    | Cite studies that might appear to meet the inclusion criteria, but which were excluded, and explain why they were excluded.                                                                                                                                                          | pg. 15                                      |
| Study characteristics                          | 17     | Cite each included study and present its characteristics.                                                                                                                                                                                                                            | pg. 15-17 & Table 1                         |
| Risk of bias in studies                        | 18     | Present assessments of risk of bias for each included study.                                                                                                                                                                                                                         | N/A                                         |
| Results of individual studies                  | 19     | For all outcomes, present, for each study: (a) summary statistics for each group (where appropriate) and (b) an effect estimate and its precision (e.g. confidence/credible interval), ideally using structured tables or plots.                                                     | Tables 1-3                                  |
| Results of syntheses                           | 20a    | For each synthesis, briefly summarise the characteristics and risk of bias among contributing studies.                                                                                                                                                                               | pg. 15-17                                   |
|                                                | 20b    | Present results of all statistical syntheses conducted. If meta-analysis was done, present for each the summary estimate and its precision (e.g. confidence/credible interval) and measures of statistical heterogeneity. If comparing groups, describe the direction of the effect. | N/A                                         |
|                                                | 20c    | Present results of all investigations of possible causes of heterogeneity among study results.                                                                                                                                                                                       | N/A                                         |
|                                                | 20d    | Present results of all sensitivity analyses conducted to assess the robustness of the synthesized results.                                                                                                                                                                           | N/A                                         |
| Reporting biases                               | 21     | Present assessments of risk of bias due to missing results (arising from reporting biases) for each synthesis assessed.                                                                                                                                                              | N/A                                         |
| Certainty of evidence                          | 22     | Present assessments of certainty (or confidence) in the body of evidence for each outcome assessed.                                                                                                                                                                                  | N/A                                         |
| <b>DISCUSSION</b>                              |        |                                                                                                                                                                                                                                                                                      |                                             |
| Discussion                                     | 23a    | Provide a general interpretation of the results in the context of other evidence.                                                                                                                                                                                                    | pg. 17-24                                   |
|                                                | 23b    | Discuss any limitations of the evidence included in the review.                                                                                                                                                                                                                      | pg. 3 & 24-25                               |
|                                                | 23c    | Discuss any limitations of the review processes used.                                                                                                                                                                                                                                | 3 & 24-25                                   |
|                                                | 23d    | Discuss implications of the results for practice, policy, and future research.                                                                                                                                                                                                       | pg. 21-25                                   |
| <b>OTHER INFORMATION</b>                       |        |                                                                                                                                                                                                                                                                                      |                                             |
| Registration and protocol                      | 24a    | Provide registration information for the review, including register name and registration number, or state that the review was not registered.                                                                                                                                       | Not Registered; Publicly available via link |
|                                                | 24b    | Indicate where the review protocol can be accessed, or state that a protocol was not prepared. <a href="http://www.wellivinghouse.com/indigenous-cultural-safety-protocol/">http://www.wellivinghouse.com/indigenous-cultural-safety-protocol/</a>                                   |                                             |
|                                                | 24c    | Describe and explain any amendments to information provided at registration or in the protocol.                                                                                                                                                                                      | N/A                                         |
| Support                                        | 25     | Describe sources of financial or non-financial support for the review, and the role of the funders or sponsors in the review.                                                                                                                                                        | pg. 27                                      |
| Competing interests                            | 26     | Declare any competing interests of review authors.                                                                                                                                                                                                                                   | pg. 26-27                                   |
| Availability of data, code and other materials | 27     | Report which of the following are publicly available and where they can be found: template data collection forms; data extracted from included studies; data used for all analyses; analytic code; any other materials used in the review.                                           | pg. 27                                      |

From: Page MJ, McKenzie JE, Bossuyt PM, et al. The PRISMA 2020 statement: an updated guideline for reporting systematic reviews. *BMJ* 2021;372:n71. doi:10.1136/bmj.n71

For more information, visit: [www.prisma-statement.org](http://www.prisma-statement.org).
