# Supplementary material for: Systematic review of Indigenous cultural safety training interventions for healthcare professionals in Australia, Canada, New Zealand and the United States
Source: PubMed Central journal article supplement — BMJ Open. 2023 Oct 4;13(10):e073320. doi: 10.1136/bmjopen-2023-073320 (PMC10551980; doi:10.1136/bmjopen-2023-073320), 2023-10-04
Supplement: bmjopen-2023-073320supp001.pdf [file bmjopen-2023-073320supp001.pdf]

## Supplementary File 1 – Study Screening Protocol

**Screening Protocol**

**Working Title:** Wise practices – what we know about the design and implementation of Indigenous cultural safety training programs for service providers: a scoping review

**Primary Research Question:** What are the impacts of Indigenous cultural safety, competency or other educational interventions on non-Indigenous health and social service providers' knowledge, attitudes, and culturally safe practices

**Secondary Research Questions:** Are there specific training approaches, strategies, formats or content

**Date:** October 1, 2018

**Screening software:** colandr <https://colandrapp.com/signin> OR abstrackr <http://abstrackr.cebm.brown.edu/>

**Level 1 Screening: Titles and Abstracts**

|                                                                                                                                                                                                                                    | Yes | No | Unclear |
|------------------------------------------------------------------------------------------------------------------------------------------------------------------------------------------------------------------------------------|-----|----|---------|
| Does the title/abstract indicate that the article is specific to <u>Indigenous contexts</u> in what is now known as Canada, the United States, Australia, or New Zealand?                                                          |     |    |         |
| Does the title/abstract indicate that the article explores <u>educational interventions (workshops, training, coursework, sessions, etc.)</u> that are designed/implemented to improve cultural safety, cultural competency, etc.? |     |    |         |
| Does the title/abstract indicate that the article focuses on education for <u>adult learners who provide services</u> (e.g. health services) to Indigenous peoples?                                                                |     |    |         |

- If all yes, include
- If all yes and some unclear, include
- If one no, exclude

## Supplementary File 1 – Study Screening Protocol

## Level 2 Screening: Full-Text

|                                                                                                                                                                                                                                                   | Yes | No | Unclear |
|---------------------------------------------------------------------------------------------------------------------------------------------------------------------------------------------------------------------------------------------------|-----|----|---------|
| Is the article specific to <u>Indigenous contexts</u> in what is now known as Canada, the United States, Australia, or New Zealand?                                                                                                               |     |    |         |
| Does the article explore <u>educational interventions (workshops, training, coursework, sessions, etc.)</u> that are designed/implemented to improve cultural safety, cultural competency, etc.?                                                  |     |    |         |
| Does the article focus on education for <u>adult</u> learners who <u>provide services</u> (e.g. health services) to Indigenous peoples?                                                                                                           |     |    |         |
| Does the article include a <u>information about outcomes</u> for the educational intervention (definition of outcome is broadly defined and can include, for example, microaggression scales, academic understanding, anti-racist measures etc.)? |     |    |         |

- If all yes, include
- If one no, exclude
