# Supplementary material for: Systematic review of Indigenous cultural safety training interventions for healthcare professionals in Australia, Canada, New Zealand and the United States
Source: PubMed Central journal article supplement — BMJ Open. 2023 Oct 4;13(10):e073320. doi: 10.1136/bmjopen-2023-073320 (PMC10551980; doi:10.1136/bmjopen-2023-073320), 2023-10-04
Supplement: bmjopen-2023-073320supp002.pdf [file bmjopen-2023-073320supp002.pdf]

## Supplementary File 2

## Data Extraction Form for Indigenous Cultural Safety Education for Healthcare Providers

|                                                                                                                                                                          |  |             |
|--------------------------------------------------------------------------------------------------------------------------------------------------------------------------|--|-------------|
| Reviewer Name:                                                                                                                                                           |  |             |
| Authors:                                                                                                                                                                 |  |             |
| Year:                                                                                                                                                                    |  |             |
| Title:                                                                                                                                                                   |  |             |
| Journal:                                                                                                                                                                 |  |             |
| <b>Study Characteristics</b>                                                                                                                                             |  | <i>Page</i> |
| Type of publication (manuscript, report, etc.)                                                                                                                           |  |             |
| Type of study (quantitative, qualitative, mixed methods)                                                                                                                 |  |             |
| Study Design (RCT, quasi-experimental, qualitative)                                                                                                                      |  |             |
| Location and time frame                                                                                                                                                  |  |             |
| Aim of the study                                                                                                                                                         |  |             |
| <b>Population</b>                                                                                                                                                        |  | <i>Page</i> |
| Discipline                                                                                                                                                               |  |             |
| Sampling & recruitment method                                                                                                                                            |  |             |
| Inclusion and exclusion criteria                                                                                                                                         |  |             |
| Data sources (primary/secondary data)                                                                                                                                    |  |             |
| Notes:                                                                                                                                                                   |  |             |
| <b>Cultural Safety</b>                                                                                                                                                   |  | <i>Page</i> |
| Does the article apply a definition of cultural safety, competency or sensitivity that includes addressing/eliminating anti-Indigenous racism, bias and/or stereotyping? |  |             |
| Is this applied to the intervention?                                                                                                                                     |  |             |
| Does the article apply an anti-racist focus in the design and/or implementation of cultural safety, competency, etc. interventions?                                      |  |             |
| Is it applied to the intervention?                                                                                                                                       |  |             |

## Supplementary File 2

|                                                                                                                                                                                                                                                                                                                 |  |             |
|-----------------------------------------------------------------------------------------------------------------------------------------------------------------------------------------------------------------------------------------------------------------------------------------------------------------|--|-------------|
| Notes:                                                                                                                                                                                                                                                                                                          |  |             |
| <b>Intervention detail</b>                                                                                                                                                                                                                                                                                      |  | <i>Page</i> |
| Type of intervention: psychological, psychosocial, educational and alternative interventions                                                                                                                                                                                                                    |  |             |
| Cultural component to intervention                                                                                                                                                                                                                                                                              |  |             |
| <b>Brief Name:</b> name/phrase that describes intervention                                                                                                                                                                                                                                                      |  |             |
| <b>Why:</b> describe rationale, goal, theory or elements essential to the intervention                                                                                                                                                                                                                          |  |             |
| <b>What - Materials:</b> Describe any physical or informational materials used in the intervention, including those provided to participants or used in intervention delivery or in training of intervention providers. Provide information on where the materials can be accessed (e.g. online appendix, URL). |  |             |
| <b>Procedures:</b> Describe each of the procedures, activities, and/or processes used in the intervention, including any enabling or support activities.                                                                                                                                                        |  |             |
| <b>Who:</b> For each category of intervention provider (e.g. psychologist, nursing assistant), describe their expertise, background and any specific training given.                                                                                                                                            |  |             |
| <b>How:</b> Describe the modes of delivery (e.g. face-to-face or by some other mechanism, such as internet or telephone) of the intervention and whether it was provided individually or in a group.                                                                                                            |  |             |
| <b>Where:</b> Describe the type(s) of location(s) where the intervention occurred, including any necessary infrastructure or relevant features.                                                                                                                                                                 |  |             |
| <b>When and How:</b> Describe the number of times the intervention was delivered and                                                                                                                                                                                                                            |  |             |

## Supplementary File 2

|                                                                                                                                                                                         |                   |                                   |
|-----------------------------------------------------------------------------------------------------------------------------------------------------------------------------------------|-------------------|-----------------------------------|
| over what period of time including the number of sessions, their schedule, and their duration, intensity or dose.                                                                       |                   |                                   |
| <b>Tailoring:</b> If the intervention was planned to be personalised, titrated or adapted, then describe what, why, when, and how.                                                      |                   |                                   |
| <b>Modifications:</b> If the intervention was modified during the course of the study, describe the changes (what, why, when, and how).                                                 |                   |                                   |
| <b>How well: Planned:</b> If intervention adherence or fidelity was assessed, describe how and by whom, and if any strategies were used to maintain or improve fidelity, describe them. |                   |                                   |
| <b>Actual:</b> If intervention adherence or fidelity was assessed, describe the extent to which the intervention was delivered as planned.                                              |                   |                                   |
| <b>Evaluation</b>                                                                                                                                                                       |                   | <i>Page</i>                       |
| Type of study (RCT, case study, etc.)                                                                                                                                                   |                   |                                   |
| Brief methods overview                                                                                                                                                                  |                   |                                   |
| Data collection tools/methods                                                                                                                                                           |                   |                                   |
| Outcome measure description (primary and secondary)                                                                                                                                     |                   |                                   |
| Outcome specific to client level change (y/n)                                                                                                                                           |                   |                                   |
| Outcome specific to clinician level change (y/n)                                                                                                                                        |                   |                                   |
| Outcome specific to institutional level change (y/n)                                                                                                                                    |                   |                                   |
| Notes:                                                                                                                                                                                  |                   |                                   |
| <b>Results</b>                                                                                                                                                                          |                   |                                   |
|                                                                                                                                                                                         | <i>individual</i> | <i>institutional</i> <i>other</i> |
| Cultural safety outcome                                                                                                                                                                 |                   |                                   |

## Supplementary File 2

|                          |  |  |  |
|--------------------------|--|--|--|
| Other outcome            |  |  |  |
| <b>Other Information</b> |  |  |  |
| Authors' conclusions     |  |  |  |
