# Supplementary material for: Systematic review of Indigenous cultural safety training interventions for healthcare professionals in Australia, Canada, New Zealand and the United States
Source: PubMed Central journal article supplement — BMJ Open. 2023 Oct 4;13(10):e073320. doi: 10.1136/bmjopen-2023-073320 (PMC10551980; doi:10.1136/bmjopen-2023-073320), 2023-10-04
Supplement: bmjopen-2023-073320supp004.pdf [file bmjopen-2023-073320supp004.pdf]

## Supplementary Figure 2

### Search Strategies:

Below are the full search strategies exactly as run on the fourth search update on May 12, 2022. Three previous searches were carried out using these strategies on September 18, 2018; July 30, 201; and March 9, 2021. The first search on September 18, 2018 was limited to articles published from 2006 and on.

### Ovid MEDLINE: Epub Ahead of Print, In-Process & Other Non-Indexed Citations, Ovid MEDLINE® Daily and Ovid MEDLINE® <1946-Present>

|    |                                                                                                                                                                                                                                                                                                                                                                                                                   |        |
|----|-------------------------------------------------------------------------------------------------------------------------------------------------------------------------------------------------------------------------------------------------------------------------------------------------------------------------------------------------------------------------------------------------------------------|--------|
| 1  | american native continental ancestry group/ or exp indians, north american/ or inuits/ or exp Indigenous Peoples/                                                                                                                                                                                                                                                                                                 | 19761  |
| 2  | Oceanic Ancestry Group/                                                                                                                                                                                                                                                                                                                                                                                           | 11661  |
| 3  | United States Indian Health Service/                                                                                                                                                                                                                                                                                                                                                                              | 596    |
| 4  | Health Services, Indigenous/                                                                                                                                                                                                                                                                                                                                                                                      | 3819   |
| 5  | (Aborigin* or Indigenous or Eskimo* or Inuit* or Inuk* or Metis or First Nations or First Nation or 1st nation or 1st nations or Native Canadian* or Native American* or Maori* or Pacific Islander* or American Indian* or Amerindian* or Native Alaska* or Alaska Native* or Native Hawaiian* or Torres Strait Islander* or on-reserve or off-reserve or tribal or autochtone* or amerindien* or indigene*).mp. | 79690  |
| 6  | (indian or indians).ti,ab,kw.                                                                                                                                                                                                                                                                                                                                                                                     | 82911  |
| 7  | India/                                                                                                                                                                                                                                                                                                                                                                                                            | 115065 |
| 8  | 6 not 7                                                                                                                                                                                                                                                                                                                                                                                                           | 55466  |
| 9  | 1 or 2 or 3 or 4 or 5 or 8                                                                                                                                                                                                                                                                                                                                                                                        | 128874 |
| 10 | Cultural Competency/                                                                                                                                                                                                                                                                                                                                                                                              | 6278   |
| 11 | Culturally Competent Care/                                                                                                                                                                                                                                                                                                                                                                                        | 2028   |
| 12 | Transcultural Nursing/                                                                                                                                                                                                                                                                                                                                                                                            | 3442   |
| 13 | cultural diversity/                                                                                                                                                                                                                                                                                                                                                                                               | 12558  |
| 14 | cultural* competenc*.tw,kf.                                                                                                                                                                                                                                                                                                                                                                                       | 4480   |
| 15 | cultural* safe*.tw,kf.                                                                                                                                                                                                                                                                                                                                                                                            | 941    |
| 16 | cultural awareness.tw,kf.                                                                                                                                                                                                                                                                                                                                                                                         | 717    |
| 17 | cultural* sensitiv*.tw,kf.                                                                                                                                                                                                                                                                                                                                                                                        | 5526   |
| 18 | cultural* secur*.tw,kf.                                                                                                                                                                                                                                                                                                                                                                                           | 54     |
| 19 | cultural humility.tw,kf.                                                                                                                                                                                                                                                                                                                                                                                          | 407    |
| 20 | cross-cultural.tw,kf.                                                                                                                                                                                                                                                                                                                                                                                             | 15212  |
| 21 | cultural* respect*.tw,kf.                                                                                                                                                                                                                                                                                                                                                                                         | 115    |
| 22 | anti-racis*.tw,kf.                                                                                                                                                                                                                                                                                                                                                                                                | 349    |

23 antiracis\*.tw,kf. 312  
 24 postcolonial\*.tw,kf. 426  
 25 colonial\*.tw,kf. 7112  
 26 or/10-25 50752  
 27 exp Health Personnel/581961  
 28 "Attitude of Health Personnel"/ 129471  
 29 "Internship and Residency"/ 57027  
 30 ((health\* or medical or nurs\* or hospital) adj2 (personnel or provider\* or professional\*  
 or worker\* or staff or specialist\* or employee\*)).tw,kf. 363535  
 31 (doctor\* or physician\* or practitioner\* or nurse\* or clinician\* or hospitalist\* or dentist\*  
 or therapist\* or physiotherapist\* or occupational therapist\* or psychologist\* or psychiatrist\* or  
 counsel?or\* or social worker\* or midwi\* or paramedic\* or emergency medical technician\* or  
 pharmacist\* or dietician\* or medic\* resident\*).tw,kf. 1374101  
 32 or/27-31 1933424  
 33 Education/ 21493  
 34 curriculum/ 83087  
 35 competency-based education/ 4429  
 36 exp education, professional/ 321367  
 37 exp Inservice Training/ 29907  
 38 exp Teaching/ 91371  
 39 exp Teaching Materials/ 123098  
 40 exp Health Personnel/ed [Education] 63884  
 41 cultural competency/ed 961  
 42 Transcultural Nursing/ed [Education] 864  
 43 exp Culture/ed [Education] 1033  
 44 (training or education\* or learn\* or teach\* or workshop\* or curricul\* or pedagog\* or  
 seminar\*).tw,kf. 1604662  
 45 (professional development or staff development).tw,kf. 13772  
 46 or/33-45 1870696  
 47 9 and 26 and 32 and 46 945  
 48 limit 47 to english language 934  
 49 limit 48 to ed=20210308-20220512 123  
 50 limit 48 to dt=20210308-20220512 111  
 51 limit 48 to ez=20210308-20220512 111  
 52 limit 48 to yr="2022 -Current" 50  
 53 49 or 50 or 51 or 52 157  
 54 remove duplicates from 53 155

**Embase Classic+Embase <1947 to 2022 May 11>**

1 indigenous people/ or alaska native/ or american indian/ or canadian aboriginal/ or first  
nation/ or indigenous australian/ 32329

2 exp amerind people/ or exp australian aborigine/ or exp eskimo-aleut people/ or exp na-  
dene people/ 7622

3 "maori (people)"/ or native hawaiian/ 2383

4 exp oceanic ancestry group/ 9022

5 indigenous health care/ 1176

6 (Aborigin\* or Indigenous or Eskimo\* or Inuit\* or Inuk\* or Metis or First Nations or First  
Nation or 1st nation or 1st nations or Native Canadian\* or Native American\* or Maori\* or Pacific  
Islander\* or American Indian\* or Amerindian\* or Native Alaska\* or Alaska Native\* or Native  
Hawaiian\* or Torres Strait Islander\* or on-reserve or off-reserve or tribal or autochtone\* or  
amerindien\* or indigene\*).ti,ab,kw. 93751

7 (indian or indians).ti,ab,kw. 114804

8 exp indian/ 40575

9 India/ 167974

10 8 or 9 201479

11 7 not 10 58826

12 (or/1-6) or 11 153454

13 cultural competence/ 7387

14 transcultural care/ 4825

15 cultural sensitivity/ 1261

16 cultural diversity/ 2692

17 cultural\* competenc\*.tw. 4546

18 cultural\* safe\*.tw. 1038

19 cultural awareness.tw. 839

20 cultural\* sensitiv\*.tw. 6598

21 cultural\* secur\*.tw. 71

22 cultural humility.tw. 426

23 cross-cultural.tw. 15606

24 cultural\* respect\*.tw. 137

25 anti-racis\*.tw. 310

26 antiracis\*.tw. 294

27 postcolonial\*.tw. 375

28 colonial\*.tw. 7139

29 or/13-28 45229

30 exp health care personnel/ 1856636

31 health personnel attitude/ 88298  
 32 ((health\* or medical or nurs\* or hospital) adj2 (personnel or provider\* or professional\* or worker\* or staff or specialist\* or employee\*)).tw.478961  
 33 (doctor\* or physician\* or practitioner\* or nurse\* or clinician\* or hospitalist\* or dentist\* or therapist\* or physiotherapist\* or occupational therapist\* or psychologist\* or psychiatrist\* or counsel?or\* or social worker\* or midwi\* or paramedic\* or emergency medical technician\* or pharmacist\* or dietician\* or medic\* resident\*).tw. 1881277  
 34 30 or 31 or 32 or 33 3109487  
 35 education/ or continuing education/ or course content/ or curriculum/ or curriculum development/ or education program/ or "outcome of education"/ 615015  
 36 in service training/ 16717  
 37 teaching/ 108269  
 38 (training or education\* or learn\* or teach\* or workshop\* or curricul\* or pedagog\* or seminar\*).tw. 2082644  
 39 (professional development or staff development).tw. 15840  
 40 35 or 36 or 37 or 38 or 39 2297974  
 41 12 and 29 and 34 and 40 930  
 42 limit 41 to embase 254  
 43 limit 42 to english language 253  
 44 limit 43 to dc=20210308-20220512 42

#### EBM Reviews - Cochrane Central Register of Controlled Trials <April 2022>

#### EBM Reviews - Cochrane Database of Systematic Reviews <2005 to May 11, 2022>

1 american native continental ancestry group/ or exp indians, north american/ or inuits/ or exp Indigenous Peoples/ 327  
 2 Oceanic Ancestry Group/ 7  
 3 United States Indian Health Service/ 4  
 4 Health Services, Indigenous/ 47  
 5 (Aborigin\* or Indigenous or Eskimo\* or Inuit\* or Inuk\* or Metis or First Nations or First Nation or 1st nation or 1st nations or Native Canadian\* or Native American\* or Maori\* or Pacific Islander\* or American Indian\* or Amerindian\* or Native Alaska\* or Alaska Native\* or Native Hawaiian\* or Torres Strait Islander\* or on-reserve or off-reserve or tribal or autochtone\* or amerindien\* or indigene\*).mp. 3033  
 6 (indian or indians).ti,ab,kw. 5091  
 7 India/ 2437  
 8 6 not 7 4449

|    |                                                                                                                                                                                                                                                                                                                                               |        |
|----|-----------------------------------------------------------------------------------------------------------------------------------------------------------------------------------------------------------------------------------------------------------------------------------------------------------------------------------------------|--------|
| 9  | 1 or 2 or 3 or 4 or 5 or 8                                                                                                                                                                                                                                                                                                                    | 6754   |
| 10 | Cultural Competency/                                                                                                                                                                                                                                                                                                                          | 190    |
| 11 | Culturally Competent Care/                                                                                                                                                                                                                                                                                                                    | 110    |
| 12 | Transcultural Nursing/                                                                                                                                                                                                                                                                                                                        | 14     |
| 13 | cultural diversity/                                                                                                                                                                                                                                                                                                                           | 79     |
| 14 | cultural* competenc*.tw,kf.                                                                                                                                                                                                                                                                                                                   | 100    |
| 15 | cultural* safe*.tw,kf.                                                                                                                                                                                                                                                                                                                        | 35     |
| 16 | cultural awareness.tw,kf.                                                                                                                                                                                                                                                                                                                     | 13     |
| 17 | cultural* sensitiv*.tw,kf.                                                                                                                                                                                                                                                                                                                    | 589    |
| 18 | cultural* secur*.tw,kf.                                                                                                                                                                                                                                                                                                                       | 8      |
| 19 | cultural humility.tw,kf.                                                                                                                                                                                                                                                                                                                      | 11     |
| 20 | cross-cultural.tw,kf.                                                                                                                                                                                                                                                                                                                         | 357    |
| 21 | cultural* respect*.tw,kf.                                                                                                                                                                                                                                                                                                                     | 8      |
| 22 | anti-racis*.tw,kf.                                                                                                                                                                                                                                                                                                                            | 9      |
| 23 | antiracis*.tw,kf.                                                                                                                                                                                                                                                                                                                             | 1      |
| 24 | postcolonial*.tw,kf.                                                                                                                                                                                                                                                                                                                          | 1      |
| 25 | colonial*.tw,kf.                                                                                                                                                                                                                                                                                                                              | 34     |
| 26 | or/10-25                                                                                                                                                                                                                                                                                                                                      | 1413   |
| 27 | exp Health Personnel/                                                                                                                                                                                                                                                                                                                         | 10279  |
| 28 | "Attitude of Health Personnel"/                                                                                                                                                                                                                                                                                                               | 2059   |
| 29 | "Internship and Residency"/                                                                                                                                                                                                                                                                                                                   | 1373   |
| 30 | ((health* or medical or nurs* or hospital) adj2 (personnel or provider* or professional* or worker* or staff or specialist* or employee*)).tw,kf.                                                                                                                                                                                             | 31086  |
| 31 | (doctor* or physician* or practitioner* or nurse* or clinician* or hospitalist* or dentist* or therapist* or physiotherapist* or occupational therapist* or psychologist* or psychiatrist* or counsel?or* or social worker* or midwi* or paramedic* or emergency medical technician* or pharmacist* or dietician* or medic* resident*).tw,kf. | 147680 |
| 32 | or/27-31                                                                                                                                                                                                                                                                                                                                      | 169128 |
| 33 | Education/                                                                                                                                                                                                                                                                                                                                    | 608    |
| 34 | curriculum/                                                                                                                                                                                                                                                                                                                                   | 1584   |
| 35 | competency-based education/                                                                                                                                                                                                                                                                                                                   | 89     |
| 36 | exp education, professional/                                                                                                                                                                                                                                                                                                                  | 5404   |
| 37 | exp Inservice Training/                                                                                                                                                                                                                                                                                                                       | 835    |
| 38 | exp Teaching/                                                                                                                                                                                                                                                                                                                                 | 4681   |
| 39 | exp Teaching Materials/                                                                                                                                                                                                                                                                                                                       | 4501   |
| 40 | exp Health Personnel/ed [Education]                                                                                                                                                                                                                                                                                                           | 16     |
| 41 | cultural competency/ed                                                                                                                                                                                                                                                                                                                        | 0      |
| 42 | Transcultural Nursing/ed [Education]                                                                                                                                                                                                                                                                                                          | 0      |

43 exp Culture/ed [Education] 1  
 44 (training or education\* or learn\* or teach\* or workshop\* or curricul\* or pedagog\* or seminar\*).tw,kf. 196173  
 45 (professional development or staff development).tw,kf. 475  
 46 or/33-45 200177  
 47 9 and 26 and 32 and 46 47  
 48 limit 47 to yr="2021 -Current" 6  
 49 remove duplicates from 48 6

#### APA PsycInfo <1806 to May Week 2 2022>

1 exp indigenous populations/ 15198  
 2 tribes/ 1259  
 3 (Aborigin\* or Indigenous or Eskimo\* or Inuit\* or Inuk\* or Metis or First Nations or First Nation or 1st nation or 1st nations or Native Canadian\* or Native American\* or Maori\* or Pacific Islander\* or American Indian\* or Amerindian\* or Native Alaska\* or Alaska Native\* or Native Hawaiian\* or Torres Strait Islander\* or on-reserve or off-reserve or tribal or autochtone\* or amerindien\* or indigene\*).tw. 31755  
 4 ((indian or indians) not india).tw. 15700  
 5 1 or 2 or 3 or 442412  
 6 cultural sensitivity/ 7916  
 7 cultural\* competenc\*.tw. 5610  
 8 cultural\* safe\*.tw. 369  
 9 cultural awareness.tw. 1291  
 10 cultural\* sensitiv\*.tw. 6987  
 11 cultural\* secur\*.tw. 29  
 12 cultural humility.tw. 482  
 13 cross-cultural.tw. 37152  
 14 cultural\* respect\*.tw. 101  
 15 anti-racis\*.tw. 836  
 16 antiracis\*.tw. 650  
 17 postcolonial\*.tw. 2067  
 18 colonial\*.tw. 6809  
 19 or/6-18 62234  
 20 exp health personnel attitudes/ 25839  
 21 medical residency/ 4825  
 22 ((health\* or medical or nurs\* or hospital) adj2 (personnel or provider\* or professional\* or worker\* or staff or specialist\* or employee\*)).tw.122311

23 (doctor\* or physician\* or practitioner\* or nurse\* or clinician\* or hospitalist\* or dentist\* or therapist\* or physiotherapist\* or occupational therapist\* or psychologist\* or psychiatrist\* or counselor\* or social worker\* or midwi\* or paramedic\* or emergency medical technician\* or pharmacist\* or dietician\* or medic\* resident\*).tw. 579592

24 20 or 21 or 22 or 23 654864

25 education/ 40342

26 curriculum/ or curriculum development/ 34802

27 exp continuing education/ or professional development/ 26018

28 educational programs/ or educational program evaluation/ or multicultural education/ 36396

29 personnel training/ or sensitivity training/ 11256

30 training/ or communication skills training/ or sensitivity training/ 27011

31 exp teaching/ 131059

32 (training or education\* or learn\* or teach\* or workshop\* or curricul\* or pedagog\* or seminar\*).tw. 1241080

33 (professional development or staff development).tw. 27110

34 or/25-33 1267277

35 5 and 19 and 24 and 34 599

36 limit 35 to (chapter or "column/opinion" or "comment/reply" or editorial or letter or review-book or review-media or review-software & other) 96

37 35 not 36 503

38 limit 37 to english language 484

39 limit 38 to up=20210308-20220512 41

40 remove duplicates from 39 41

### CINAHL Search History

Interface - EBSCOhost Research Databases

Search Screen - Advanced Search

Database - CINAHL Complete

| #   | Query                | Limiters/Expanders                                                     | Results |
|-----|----------------------|------------------------------------------------------------------------|---------|
| S31 | S29 AND S30          | Expanders - Apply equivalent subjects<br>Search modes - Boolean/Phrase | 109     |
| S30 | EM 20210308-20220512 | Expanders - Apply equivalent subjects                                  | 474,059 |

|     |                                                                                                |                                                                                                       |           |
|-----|------------------------------------------------------------------------------------------------|-------------------------------------------------------------------------------------------------------|-----------|
|     |                                                                                                | Search modes - Boolean/Phrase                                                                         |           |
| S29 | S22 OR S26                                                                                     | Limiters - English Language<br>Expanders - Apply equivalent subjects<br>Search modes - Boolean/Phrase | 1,304     |
| S28 | S27                                                                                            | Search modes - Boolean/Phrase                                                                         | 1,173     |
| S27 | S22 OR S26                                                                                     | Limiters - Published Date: 20060101-20181231; English Language<br>Search modes - Boolean/Phrase       | 709       |
| S26 | S6 AND S25                                                                                     | Search modes - Boolean/Phrase                                                                         | 95        |
| S25 | S23 OR S24                                                                                     | Search modes - Boolean/Phrase                                                                         | 1,087     |
| S24 | (MH "Cultural Safety/ED")                                                                      | Search modes - Boolean/Phrase                                                                         | 38        |
| S23 | (MH "Cultural Competence/ED")                                                                  | Search modes - Boolean/Phrase                                                                         | 1,049     |
| S22 | S6 AND S12 AND S17 AND S21                                                                     | Search modes - Boolean/Phrase                                                                         | 1,144     |
| S21 | S18 OR S19 OR S20                                                                              | Search modes - Boolean/Phrase                                                                         | 1,285,878 |
| S20 | (professional development or staff development)                                                | Search modes - Boolean/Phrase                                                                         | 73,618    |
| S19 | (training or education* or learn* or teach* or workshop* or curricul* or pedagog* or seminar*) | Search modes - Boolean/Phrase                                                                         | 1,144,026 |



|     |                                                                                                                                                                                                                                                                                                                                         |                               |           |
|-----|-----------------------------------------------------------------------------------------------------------------------------------------------------------------------------------------------------------------------------------------------------------------------------------------------------------------------------------------|-------------------------------|-----------|
| S18 | (MH "Education") OR (MH "Curriculum+") OR (MH "Education, Competency-Based") OR (MH "Teaching") OR (MH "Teaching Materials+") OR (MH "Teaching Methods+")                                                                                                                                                                               | Search modes - Boolean/Phrase | 293,141   |
| S17 | S13 OR S14 OR S15 OR S16                                                                                                                                                                                                                                                                                                                | Search modes - Boolean/Phrase | 1,524,544 |
| S16 | (doctor* or physician* or practitioner* or nurse* or clinician* or hospitalist* or dentist* or therapist* or physiotherapist* or occupational therapist* or psychologist* or psychiatrist* or counselor* or social worker* or midwife* or paramedic* or emergency medical technician* or pharmacist* or dietician* or medic* resident*) | Search modes - Boolean/Phrase | 1,220,148 |
| S15 | ((health* or medical or nurse* or hospital) N2 (personnel or provider* or professional* or worker* or staff or specialist* or employee*))                                                                                                                                                                                               | Search modes - Boolean/Phrase | 375,539   |
| S14 | (MH "Attitude of Health Personnel+")                                                                                                                                                                                                                                                                                                    | Search modes - Boolean/Phrase | 114,454   |
| S13 | (MH "Health Personnel+")                                                                                                                                                                                                                                                                                                                | Search modes - Boolean/Phrase | 627,401   |
| S12 | S7 OR S8 OR S9 OR S10 OR S11                                                                                                                                                                                                                                                                                                            | Search modes - Boolean/Phrase | 51,961    |
| S11 | cultural* competenc* or cultural* safe* or cultural awareness or cultural* sensitiv* or cultural* secur* or cultural humility or cross-cultural or cultural* respect* or anti-racis* or antiracis* or postcolonial* or colonial*                                                                                                        | Search modes - Boolean/Phrase | 31,303    |
| S10 | (MH "Cultural Diversity") OR (MH "Cultural Values")                                                                                                                                                                                                                                                                                     | Search modes - Boolean/Phrase | 24,283    |
| S9  | (MH "Transcultural Care")                                                                                                                                                                                                                                                                                                               | Search modes - Boolean/Phrase | 3,296     |
| S8  | (MH "Cultural Safety")                                                                                                                                                                                                                                                                                                                  | Search modes - Boolean/Phrase | 778       |

|    |                                                                                                                                                                                                                                                                                                                                                                                                               |                               |        |
|----|---------------------------------------------------------------------------------------------------------------------------------------------------------------------------------------------------------------------------------------------------------------------------------------------------------------------------------------------------------------------------------------------------------------|-------------------------------|--------|
| S7 | (MH "Cultural Competence")                                                                                                                                                                                                                                                                                                                                                                                    | Search modes - Boolean/Phrase | 11,142 |
| S6 | S1 OR S2 OR S5                                                                                                                                                                                                                                                                                                                                                                                                | Search modes - Boolean/Phrase | 55,137 |
| S5 | S3 NOT S4                                                                                                                                                                                                                                                                                                                                                                                                     | Search modes - Boolean/Phrase | 12,493 |
| S4 | (MH "India")                                                                                                                                                                                                                                                                                                                                                                                                  | Search modes - Boolean/Phrase | 42,378 |
| S3 | TI ( (indian or indians) ) OR AB ( (indian or indians) )                                                                                                                                                                                                                                                                                                                                                      | Search modes - Boolean/Phrase | 22,181 |
| S2 | (Aborigin* or Indigenous or Eskimo* or Inuit* or Inuk* or Metis or First Nations or First Nation or 1st nation or 1st nations or Native Canadian* or Native American* or Maori* or Pacific Islander* or American Indian* or Amerindian* or Native Alaska* or Alaska Native* or Native Hawaiian* or Torres Strait Islander* or on-reserve or off-reserve or tribal or autochtone* or amerindien* or indigene*) | Search modes - Boolean/Phrase | 47,753 |
| S1 | (MH "Indigenous Peoples+") OR (MH "Health Services, Indigenous") OR (MH "Indigenous Health")                                                                                                                                                                                                                                                                                                                  | Search modes - Boolean/Phrase | 23,870 |

### ProQuest Search Strategy

#### Search Strategy

| Set# | Searched for                                                                                                                                                                                                                                                                                                                                                             | Databases                                                                                                                                                                         | Results |
|------|--------------------------------------------------------------------------------------------------------------------------------------------------------------------------------------------------------------------------------------------------------------------------------------------------------------------------------------------------------------------------|-----------------------------------------------------------------------------------------------------------------------------------------------------------------------------------|---------|
| S1   | noft((Aborigin* OR Indigenous OR Eskimo* OR Inuit* OR Inuk* OR Metis OR First Nations OR First Nation OR 1st nation OR 1st nations OR "Native Canadian*" OR "Native American*" OR Maori* OR "Pacific Islander*" OR "American Indian*" OR Amerindian* OR "Native Alaska*" OR "Alaska Native*" OR "Native Hawaiian*" OR "Torres Strait Islander*" OR "on-reserve" OR "off- | Applied Social Sciences Index & Abstracts (ASSIA), ERIC, International Bibliography of the Social Sciences (IBSS), ProQuest Dissertations & Theses Global, Sociological Abstracts | 7452    |

|    |                                                                                                                                                                                                                                                                                                                                                                                                                                                       |                                                                                                                                                                                   |        |
|----|-------------------------------------------------------------------------------------------------------------------------------------------------------------------------------------------------------------------------------------------------------------------------------------------------------------------------------------------------------------------------------------------------------------------------------------------------------|-----------------------------------------------------------------------------------------------------------------------------------------------------------------------------------|--------|
|    | reserve" OR tribal OR autochtone* OR amerindien* OR indigene*)) AND la.exact("English") AND pd(>20201231)                                                                                                                                                                                                                                                                                                                                             |                                                                                                                                                                                   |        |
| S2 | noft(("cultural* competenc*" OR "cultural* safe*" OR "cultural awareness" OR "cultural* sensitiv*" OR "cultural* secur*" OR "cultural humility" OR "cross-cultural" OR "cultural* respect*" OR "anti-racis*" OR antiracis* OR postcolonial* OR colonial*)) AND la.exact("English") AND pd(>20201231)                                                                                                                                                  | Applied Social Sciences Index & Abstracts (ASSIA), ERIC, International Bibliography of the Social Sciences (IBSS), ProQuest Dissertations & Theses Global, Sociological Abstracts | 10129  |
| S3 | noft((health* OR medical OR nurs* OR hospital) NEAR/2 (personnel OR provider* OR professional* OR worker* OR staff OR specialist* OR employee*)) AND la.exact("English") AND pd(>20201231)                                                                                                                                                                                                                                                            | Applied Social Sciences Index & Abstracts (ASSIA), ERIC, International Bibliography of the Social Sciences (IBSS), ProQuest Dissertations & Theses Global, Sociological Abstracts | 10349  |
| S4 | noft((((doctor* OR physician* OR practitioner* OR nurse* OR clinician* OR hospitalist* OR dentist* OR therapist* OR physiotherapist* OR ("occupational therapist" OR "occupational therapists") OR psychologist* OR psychiatrist* OR counsellor* OR ("social worker" OR "social workers") OR midwi* OR paramedic* OR "emergency medical technician*" OR pharmacist* OR dietician* OR "medic* resident*")))) AND la.exact("English") AND pd(>20201231) | Applied Social Sciences Index & Abstracts (ASSIA), ERIC, International Bibliography of the Social Sciences (IBSS), ProQuest Dissertations & Theses Global, Sociological Abstracts | 31501  |
| S5 | noft(((training OR education* OR learn* OR teach* OR workshop* OR curricul* OR pedagog* OR seminar* OR "professional development" OR "staff development")))) AND la.exact("English") AND pd(>20201231)                                                                                                                                                                                                                                                | Applied Social Sciences Index & Abstracts (ASSIA), ERIC, International Bibliography of the Social Sciences (IBSS), ProQuest Dissertations & Theses Global, Sociological Abstracts | 115033 |
| S6 | (S1 AND S2 AND (S3 OR S4) AND S5)                                                                                                                                                                                                                                                                                                                                                                                                                     | Applied Social Sciences Index & Abstracts (ASSIA), ERIC, International Bibliography of the Social Sciences (IBSS), ProQuest Dissertations & Theses Global, Sociological Abstracts | 77     |

## Bibliography of Indigenous Peoples in North America (EBSCOhost)

### 2 Results

(( ((health\* or medical or nurs\* or hospital) N2 (personnel or provider\* or professional\* or worker\* or staff or specialist\* or employee\*)) ) OR ( (doctor\* or physician\* or practitioner\* or nurse\* or clinician\* or hospitalist\* or dentist\* or therapist\* or physiotherapist\* or occupational therapist\* or psychologist\* or psychiatrist\* or counsel?or\* or social worker\* or midwi\* or paramedic\* or emergency medical technician\* or pharmacist\* or dietician\* or medic\* resident\*) ))

AND

( ("cultural\* competenc\*" or "cultural\* safe\*" or "cultural awareness" or "cultural\* sensitiv\*" or "cultural\* secur\*" or "cultural humility" or "cross-cultural" or "cultural\* respect\*" or "anti-racis\*" or antiracis\*) )

AND

( (training or education\* or learn\* or teach\* or workshop\* or curricul\* or pedagog\* or seminar\* or "professional development" or "staff development") )

Limit to 2021-2022, English Language, Academic Journals

### Web of Science

Science Citation Index Expanded (SCI-EXPANDED)

Social Sciences Citation Index (SSCI)

93 Results

((TS=("cultural\* competenc\*" or "cultural\* safe\*" or "cultural awareness" or "cultural\* sensitiv\*" or "cultural\* secur\*" or "cultural humility" or "cross-cultural" or "cultural\* respect\*" or "anti-racis\*" or antiracis\*) AND TS=(training or education\* or learn\* or teach\* or workshop\* or curricul\* or pedagog\* or seminar\* or "professional development" or "staff development") AND TS=(Aborigin\* or Indigenous or Eskimo\* or Inuit\* or Inuk\* or Metis or First Nations or First Nation or 1st nation or 1st nations or Native Canadian\* or Native American\* or Maori\* or Pacific Islander\* or American Indian\* or Amerindian\* or Native Alaska\* or Alaska Native\* or Native Hawaiian\* or Torres Strait Islander\* or on-reserve or off-reserve or tribal or autochtone\* or amerindien\* or indigene\*) AND TS=("health care" or healthcare or hospital\* or medical or nurses or doctors)))

Timespan: 2021-03-08 to 2022-05-12 (Index Date)
