# Supplementary material for: Systematic review of Indigenous cultural safety training interventions for healthcare professionals in Australia, Canada, New Zealand and the United States
Source: PubMed Central journal article supplement — BMJ Open. 2023 Oct 4;13(10):e073320. doi: 10.1136/bmjopen-2023-073320 (PMC10551980; doi:10.1136/bmjopen-2023-073320), 2023-10-04
Supplement: bmjopen-2023-073320supp005.pdf [file bmjopen-2023-073320supp005.pdf]

## Supplementary Figure 3

## Well Living House Quality Appraisal Tool

Citation (Title, Author, Date) [INSERT FOR EACH STUDY]

Local Community Relevance of Method and Measures (Score out of 4)

|                                                                                                                                                         |                                                                                                                                                                                                                                                                                                                                                                                                                                                                                                             |
|---------------------------------------------------------------------------------------------------------------------------------------------------------|-------------------------------------------------------------------------------------------------------------------------------------------------------------------------------------------------------------------------------------------------------------------------------------------------------------------------------------------------------------------------------------------------------------------------------------------------------------------------------------------------------------|
| Did the measures of success reflect local Indigenous community understandings of success?                                                               | <p>Yes = 2 (look for: outcomes are derived from community members/ are the outcomes reflecting indigenous concepts evidence provided explicitly in the text where did evaluation take place, who collected evaluation data?)</p> <p>Partial = 1 (hints of including local community values/beliefs/knowledge systems in text and therefore assumption made by reviewers that evidence is present)</p> <p>No = 0 (nothing was said or author(s) indicated that success was not defined by the community)</p> |
| Had methods and tools been tested and validated previously in a similar Indigenous context and reviewed for relevance by appropriate community members? | <p>Yes = 2 (evidence is provided explicitly in text)</p> <p>Partial = 1 (hints of using a tool that has been used in Indigenous contexts and therefore assumption made by reviewers that evidence is present)</p> <p>No = 0 (nothing was said or author(s) said that the evaluation method/tool has not been used in Indigenous contexts)</p>                                                                                                                                                               |

Rigour and internal validity of the evaluation method (Score out of 4)

|                                                                                        |                                                                                                                                                                                                                                                                                                                                                                                                                                                                                                                                                                                                                                                                                                                                                                |
|----------------------------------------------------------------------------------------|----------------------------------------------------------------------------------------------------------------------------------------------------------------------------------------------------------------------------------------------------------------------------------------------------------------------------------------------------------------------------------------------------------------------------------------------------------------------------------------------------------------------------------------------------------------------------------------------------------------------------------------------------------------------------------------------------------------------------------------------------------------|
| Do the quantitative or qualitative methods meet relevant rigour and internal validity? | <p>Excellent = 4<br/>Fair = 3<br/>Barely Acceptable = 2<br/>Poor = 1</p> <p>Generally: Is the study design appropriate for evaluation research question(s)? Are the conclusions supported and justified by the results?</p> <p><u>Quantitative</u>: Is the sample size described and justified? Are the instruments/tools already validated?</p> <p>Are threats to validity addressed (such as confounding factors)?</p> <p><u>Qualitative</u>: Are the participants selected using appropriate strategies (such as purposive sample or until saturation is reached)? Is there clearly articulated theoretical approach/methodology/ data collection methods and analytic lens – do these fit together? Is there evidence of truthfulness of the findings?</p> |
|----------------------------------------------------------------------------------------|----------------------------------------------------------------------------------------------------------------------------------------------------------------------------------------------------------------------------------------------------------------------------------------------------------------------------------------------------------------------------------------------------------------------------------------------------------------------------------------------------------------------------------------------------------------------------------------------------------------------------------------------------------------------------------------------------------------------------------------------------------------|

Strength of the Evidence (score out of 4)

|                         |                                                                                                                                                                                                                                                                                                                        |
|-------------------------|------------------------------------------------------------------------------------------------------------------------------------------------------------------------------------------------------------------------------------------------------------------------------------------------------------------------|
| Is the evidence strong? | <p>Excellent = 4<br/>Fair = 3<br/>Barely Acceptable = 2<br/>Poor = 1</p> <p><u>Quantitative</u>: Does the evidence have adequate power and statistical significance? Is the response rate reasonable?</p> <p><u>Qualitative</u>: Are there major and convincing themes from triangulation, and/or member checking?</p> |
|-------------------------|------------------------------------------------------------------------------------------------------------------------------------------------------------------------------------------------------------------------------------------------------------------------------------------------------------------------|

Total Score:
