# Supplementary figures and images for: Systematic review of Indigenous cultural safety training interventions for healthcare professionals in Australia, Canada, New Zealand and the United States
Source: PubMed Central journal article supplement — BMJ Open. 2023 Oct 4;13(10):e073320. doi: 10.1136/bmjopen-2023-073320 (PMC10551980; doi:10.1136/bmjopen-2023-073320), 2023-10-04

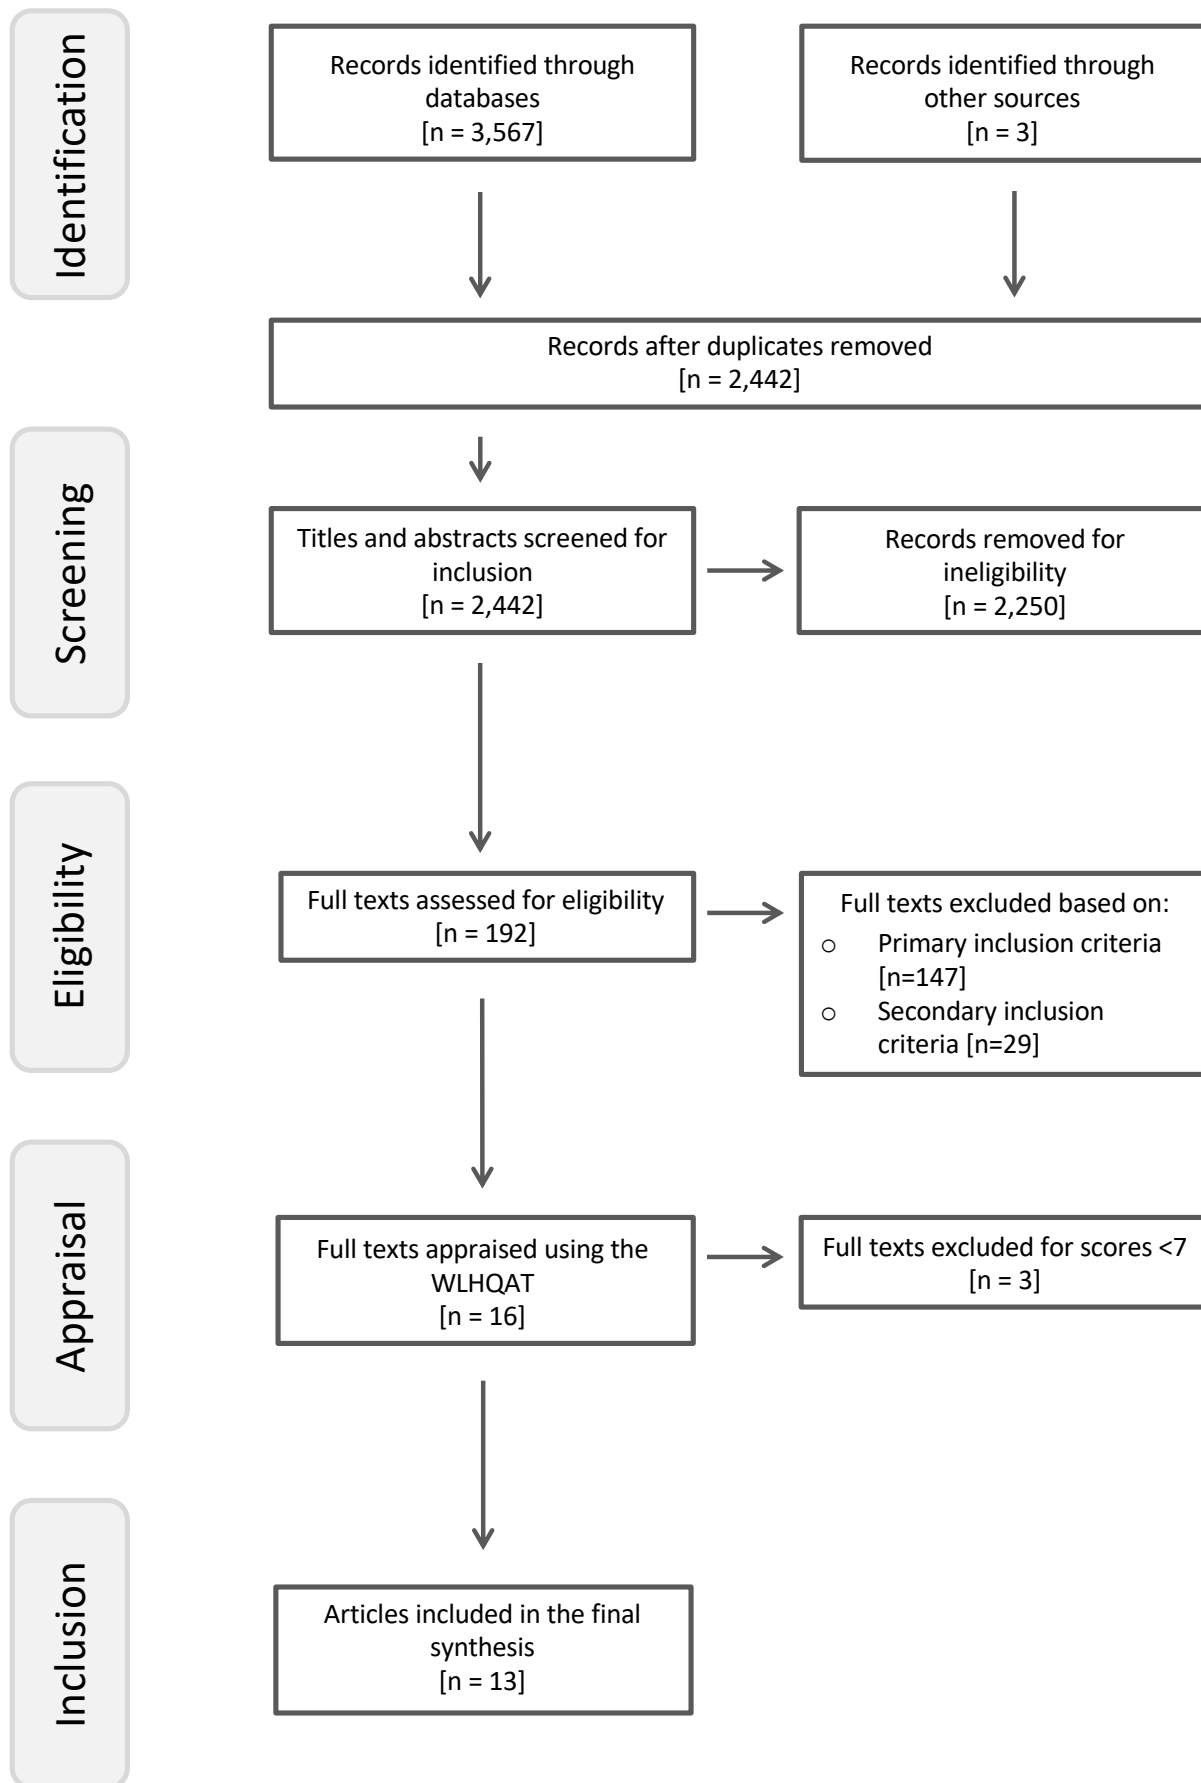

Supplement: bmjopen-2023-073320supp003.pdf [file bmjopen-2023-073320supp003.pdf]
